# Supplementary material
Source: publisher site journal article supplement (https://www.spandidos-publications.com/7943/downloadSupplementary)
Supplement: Supplementary file 1 [file downloadSupplementary]

## Sheet: All genes
Table SI. Detailed RNA-sequencing data.
ID	baseMean	Control 1	Control 2	Control 3	AST-IV 1	AST-IV 2	AST-IV 3	foldChange(AST-IV/Control)	log2FoldChange	pval	padj	Regulation	Chromosome	Start Site	End Site	Direction	Length	Name	GO	KEGG	EC	eggNOG Class	eggNOG	Description	Entrez_geneID	UniProtAC	BP	CC	MF	Pathway	SwissProtName
ENSG00000132470	1269.41	18.2314515775887	16.8853283427585	18.1184894153577	3.98783562697792	2.86873666107394	3.48553752472822	0.1918	-2.382	2.765e-61	4.077e-57	Down Regulation	17	75721328	75757818	+	6761	ITGB4	GO:0001664;GO:0005178;GO:0005515;GO:0005604;GO:0005730;GO:0005886;GO:0005925;GO:0006914;GO:0007154;GO:0007155;GO:0007160;GO:0007229;GO:0008305;GO:0009611;GO:0009925;GO:0009986;GO:0016020;GO:0016021;GO:0016477;GO:0022011;GO:0030054;GO:0030056;GO:0031252;GO:0031581;GO:0031965;GO:0031994;GO:0032290;GO:0033627;GO:0035878;GO:0038132;GO:0043235;GO:0043589;GO:0046847;GO:0048333;GO:0048870;GO:0061450;GO:…	K06525	-	M;T;W	KOG1226;35IBX;39T9G;3BEK4;3D38E;3J1GJ;4853T;48YVP;4M7IV;4N59R	integrin subunit beta 4 [Source:HGNC Symbol;Acc:HGNC:6158]	3691	P16144;A0A024R8T0	GO:0006914//autophagy;GO:0007154//cell communication;GO:0007155//cell adhesion;GO:0007160//cell-matrix adhesion;GO:0007229//integrin-mediated signaling pathway;GO:0009611//response to wounding;GO:0016477//cell migration;GO:0022011//myelination in peripheral nervous system;GO:0031581//hemidesmosome assembly;GO:0032290//peripheral nervous system myelin formation;GO:0033627//cell adhesion mediated b…	GO:0005604//basement membrane;GO:0005730//nucleolus;GO:0005886//plasma membrane;GO:0005925//focal adhesion;GO:0008305//integrin complex;GO:0009925//basal plasma membrane;GO:0009986//cell surface;GO:0016020//membrane;GO:0016021//integral component of membrane;GO:0030054//cell junction;GO:0030056//hemidesmosome;GO:0031252//cell leading edge;GO:0031965//nuclear membrane;GO:0043235//receptor complex;…	GO:0001664//G protein-coupled receptor binding;GO:0005178//integrin binding;GO:0005515//protein binding;GO:0031994//insulin-like growth factor I binding;GO:0038132//neuregulin binding;	ko05414(Dilated cardiomyopathy);ko05412(Arrhythmogenic right ventricular cardiomyopathy);ko05410(Hypertrophic cardiomyopathy);ko05165(Human papillomavirus infection);ko04810(Regulation of actin cytoskeleton);ko04512(ECM-receptor interaction);ko04510(Focal adhesion);ko04151(PI3K-Akt signaling pathway)	ITGB4
ENSG00000116962	12245.7	30.5811143198091	43.9682620832742	38.1278670353433	218.06962031972	204.458712805014	183.541984652072	5.3424	2.4175	8.695e-57	6.409e-53	Up Regulation	1	235975830	236065109	-	5811	NID1	GO:0005201;GO:0005509;GO:0005518;GO:0005576;GO:0005604;GO:0005886;GO:0007155;GO:0007160;GO:0010811;GO:0030198;GO:0031012;GO:0032836;GO:0043236;GO:0043237;GO:0043394;GO:0045785;GO:0050840;GO:0051149;GO:0062023;GO:0070062;GO:0071711;GO:0071944;GO:0098637;GO:0110011;GO:0110165;GO:2001046	K06826	-	M;T;W;I	KOG1214;358YK;38HNZ;3BBTR;3CY69;3J5VG;48A6D;49227;4ME54;4MTIA	nidogen 1 [Source:HGNC Symbol;Acc:HGNC:7821]	4811	P14543	GO:0007155//cell adhesion;GO:0007160//cell-matrix adhesion;GO:0010811//positive regulation of cell-substrate adhesion;GO:0030198//extracellular matrix organization;GO:0032836//glomerular basement membrane development;GO:0045785//positive regulation of cell adhesion;GO:0051149//positive regulation of muscle cell differentiation;GO:0071711//basement membrane organization;GO:0110011//regulation of b…	GO:0005576//extracellular region;GO:0005604//basement membrane;GO:0005886//plasma membrane;GO:0031012//extracellular matrix;GO:0062023//collagen-containing extracellular matrix;GO:0070062//extracellular exosome;GO:0071944//cell periphery;GO:0098637//protein complex involved in cell-matrix adhesion;GO:0110165//cellular anatomical entity;	GO:0005201//extracellular matrix structural constituent;GO:0005509//calcium ion binding;GO:0005518//collagen binding;GO:0043236//laminin binding;GO:0043237//laminin-1 binding;GO:0043394//proteoglycan binding;GO:0050840//extracellular matrix binding;	-	NID1
ENSG00000141753	1064.74	53.8798851642698	37.7415746437611	45.8631194565432	9.56939012386786	8.12366892978472	7.94633183150084	0.184	-2.442	5.579e-41	2.742e-37	Down Regulation	17	40443450	40457725	+	2205	IGFBP4	GO:0000165;GO:0001558;GO:0005102;GO:0005515;GO:0005520;GO:0005576;GO:0005615;GO:0005788;GO:0006954;GO:0007165;GO:0010906;GO:0014070;GO:0019838;GO:0031994;GO:0031995;GO:0040008;GO:0043410;GO:0043567;GO:0043568;GO:0044342;GO:0090090	K23576	-	S;O;T	2QTC8;35F5S;38EUE;3BBAT;3D1RG;3JB87;489WS;494YG;4MAWD;4MT8N	insulin like growth factor binding protein 4 [Source:HGNC Symbol;Acc:HGNC:5473]	3487	P22692;A0A024R1U8	GO:0000165//MAPK cascade;GO:0001558//regulation of cell growth;GO:0006954//inflammatory response;GO:0007165//signal transduction;GO:0010906//regulation of glucose metabolic process;GO:0014070//response to organic cyclic compound;GO:0040008//regulation of growth;GO:0043410//positive regulation of MAPK cascade;GO:0043567//regulation of insulin-like growth factor receptor signaling pathway;GO:004356…	GO:0005576//extracellular region;GO:0005615//extracellular space;GO:0005788//endoplasmic reticulum lumen;	GO:0005102//signaling receptor binding;GO:0005515//protein binding;GO:0005520//insulin-like growth factor binding;GO:0019838//growth factor binding;GO:0031994//insulin-like growth factor I binding;GO:0031995//insulin-like growth factor II binding;	-	IGFBP4
ENSG00000183092	264.422	3.85720597723672	3.24709636898119	3.08585565147004	0.410764229710136	0.233280872041181	0.511211834240729	0.1114	-3.166	1.273e-36	4.694e-33	Down Regulation	14	100537147	100587417	-	7882	BEGAIN	GO:0005515;GO:0005737;GO:0016020;GO:0016301;GO:0016310;GO:0045202;GO:0098962	-	-	-	-	brain enriched guanylate kinase associated [Source:HGNC Symbol;Acc:HGNC:24163]	57596	Q9BUH8	GO:0016310//phosphorylation;GO:0098962//regulation of postsynaptic neurotransmitter receptor activity;	GO:0005737//cytoplasm;GO:0016020//membrane;GO:0045202//synapse;	GO:0005515//protein binding;GO:0016301//kinase activity;	-	BEGAIN
ENSG00000041982	621.042	5.66731027454906	5.7649413400024	5.65176615114359	1.82792083744061	1.65155031647632	1.38159199779788	0.282	-1.826	3.828e-35	1.129e-31	Down Regulation	9	115019575	115118207	-	9589	TNC	GO:0001558;GO:0001649;GO:0002009;GO:0005201;GO:0005515;GO:0005576;GO:0005604;GO:0005614;GO:0005615;GO:0005788;GO:0005925;GO:0007155;GO:0007528;GO:0008284;GO:0009611;GO:0010628;GO:0014012;GO:0016020;GO:0030155;GO:0030334;GO:0031175;GO:0042127;GO:0045545;GO:0050727;GO:0060739;GO:0060740;GO:0062023;GO:0090733;GO:0098966	K06252	-	T;M;D;L	KOG1225;KOG2579;35KJG;38D9J;3BAIS;3D2IC;3JACA;485AW;48WJ6;4M8TX;4N0WP	tenascin C [Source:HGNC Symbol;Acc:HGNC:5318]	3371	P24821;B4E1W8;Q4LE33	GO:0001558//regulation of cell growth;GO:0001649//osteoblast differentiation;GO:0002009//morphogenesis of an epithelium;GO:0007155//cell adhesion;GO:0007528//neuromuscular junction development;GO:0008284//positive regulation of cell population proliferation;GO:0009611//response to wounding;GO:0010628//positive regulation of gene expression;GO:0014012//peripheral nervous system axon regeneration;G…	GO:0005576//extracellular region;GO:0005604//basement membrane;GO:0005614//interstitial matrix;GO:0005615//extracellular space;GO:0005788//endoplasmic reticulum lumen;GO:0005925//focal adhesion;GO:0016020//membrane;GO:0062023//collagen-containing extracellular matrix;GO:0090733//tenascin complex;GO:0098966//perisynaptic extracellular matrix;	GO:0005201//extracellular matrix structural constituent;GO:0005515//protein binding;GO:0045545//syndecan binding;	ko05206(MicroRNAs in cancer);ko05165(Human papillomavirus infection);ko04512(ECM-receptor interaction);ko04510(Focal adhesion);ko04151(PI3K-Akt signaling pathway)	TNC
ENSG00000164045	354.421	7.92683603565654	7.46478476137438	7.52011027515914	1.76419998865839	2.01766213870914	2.26824300300748	0.2607	-1.94	7.365e-35	1.81e-31	Down Regulation	3	48157146	48188417	-	4145	CDC25A	GO:0000079;GO:0000082;GO:0000086;GO:0004721;GO:0004725;GO:0005515;GO:0005634;GO:0005654;GO:0005737;GO:0005829;GO:0006470;GO:0007049;GO:0008283;GO:0009314;GO:0010971;GO:0016787;GO:0019901;GO:0034644;GO:0051087;GO:0051301;GO:0110032;GO:1902751	K06645	EC:3.1.3.48	D	KOG3772;359XJ;38GCJ;3BIJY;3CSHR;3JBHE;48AGW;493AP;4M76K;4N4GT	cell division cycle 25A [Source:HGNC Symbol;Acc:HGNC:1725]	993	P30304	GO:0000079//regulation of cyclin-dependent protein serine/threonine kinase activity;GO:0000082//G1/S transition of mitotic cell cycle;GO:0000086//G2/M transition of mitotic cell cycle;GO:0006470//protein dephosphorylation;GO:0007049//cell cycle;GO:0008283//cell population proliferation;GO:0009314//response to radiation;GO:0010971//positive regulation of G2/M transition of mitotic cell cycle;GO:00…	GO:0005634//nucleus;GO:0005654//nucleoplasm;GO:0005737//cytoplasm;GO:0005829//cytosol;	GO:0004721//phosphoprotein phosphatase activity;GO:0004725//protein tyrosine phosphatase activity;GO:0005515//protein binding;GO:0016787//hydrolase activity;GO:0019901//protein kinase binding;GO:0051087//chaperone binding;	ko05207(Chemical carcinogenesis - receptor activation);ko05206(MicroRNAs in cancer);ko04914(Progesterone-mediated oocyte maturation);ko04218(Cellular senescence);ko04110(Cell cycle)	CDC25A
ENSG00000066248	265.8	6.06814979375277	5.06131495667172	5.31029234560073	0.888914727093385	1.19980052577999	0.801402248197309	0.1741	-2.522	3.063e-32	6.45e-29	Down Regulation	2	232878701	233013256	-	4647	NGEF	GO:0005085;GO:0005515;GO:0005737;GO:0005829;GO:0007399;GO:0016020;GO:0030154;GO:0030426;GO:0042995;GO:0043087;GO:0048013;GO:0050790;GO:0051056;GO:0061002;GO:0090630	K07525	-	T	KOG3523;35NST;38CD2;3BEE7;3CTY1;3J6CA;483PH;48YFV;4MEXM;4N66S	neuronal guanine nucleotide exchange factor [Source:HGNC Symbol;Acc:HGNC:7807]	25791	Q8N5V2	GO:0007399//nervous system development;GO:0030154//cell differentiation;GO:0043087//regulation of GTPase activity;GO:0048013//ephrin receptor signaling pathway;GO:0050790//regulation of catalytic activity;GO:0051056//regulation of small GTPase mediated signal transduction;GO:0061002//negative regulation of dendritic spine morphogenesis;GO:0090630//activation of GTPase activity;	GO:0005737//cytoplasm;GO:0005829//cytosol;GO:0016020//membrane;GO:0030426//growth cone;GO:0042995//cell projection;	GO:0005085//guanyl-nucleotide exchange factor activity;GO:0005515//protein binding;	ko04360(Axon guidance)	NGEF
ENSG00000028137	544.448	15.2725338382764	13.2743212472979	14.1416943723901	1.89125056268431	1.30307677875795	2.89257395395147	0.14	-2.836	1.915e-31	3.529e-28	Down Regulation	1	12166991	12209228	+	3778	TNFRSF1B	GO:0002718;GO:0002724;GO:0002947;GO:0003176;GO:0003177;GO:0003332;GO:0005031;GO:0005515;GO:0005576;GO:0005634;GO:0005886;GO:0006915;GO:0006954;GO:0006955;GO:0007166;GO:0007568;GO:0008630;GO:0010614;GO:0016020;GO:0016021;GO:0030424;GO:0031625;GO:0031641;GO:0031643;GO:0032496;GO:0033209;GO:0035579;GO:0042129;GO:0043025;GO:0043120;GO:0043196;GO:0045121;GO:0048471;GO:0048714;GO:0050728;GO:0050779;GO:…	K05141	-	S;T	2RZ23;359M5;39SNX;3BIN2;3D34M;3J2WP;485R5;4978G;4M936;4MU7Q	TNF receptor superfamily member 1B [Source:HGNC Symbol;Acc:HGNC:11917]	7133	P20333	GO:0002718//regulation of cytokine production involved in immune response;GO:0002724//regulation of T cell cytokine production;GO:0003176//aortic valve development;GO:0003177//pulmonary valve development;GO:0003332//negative regulation of extracellular matrix constituent secretion;GO:0006915//apoptotic process;GO:0006954//inflammatory response;GO:0006955//immune response;GO:0007166//cell surface …	GO:0002947//tumor necrosis factor receptor superfamily complex;GO:0005576//extracellular region;GO:0005634//nucleus;GO:0005886//plasma membrane;GO:0016020//membrane;GO:0016021//integral component of membrane;GO:0030424//axon;GO:0035579//specific granule membrane;GO:0043025//neuronal cell body;GO:0043196//varicosity;GO:0045121//membrane raft;GO:0048471//perinuclear region of cytoplasm;	GO:0005031//tumor necrosis factor-activated receptor activity;GO:0005515//protein binding;GO:0031625//ubiquitin protein ligase binding;GO:0043120//tumor necrosis factor binding;	ko05170(Human immunodeficiency virus 1 infection);ko05022(Pathways of neurodegeneration - multiple diseases);ko05014(Amyotrophic lateral sclerosis);ko04920(Adipocytokine signaling pathway);ko04668(TNF signaling pathway);ko04061(Viral protein interaction with cytokine and cytokine receptor);ko04060(Cytokine-cytokine receptor interaction)	TNFRSF1B
ENSG00000175793	1182.62	78.8058026904379	82.523437305368	80.3391217524321	16.8573927704477	22.3105987483197	25.6246530782539	0.2652	-1.915	1.542e-30	2.526e-27	Down Regulation	1	26863149	26864456	+	1308	SFN	GO:0000079;GO:0001836;GO:0003334;GO:0005515;GO:0005576;GO:0005615;GO:0005634;GO:0005737;GO:0005829;GO:0006469;GO:0007165;GO:0008104;GO:0008426;GO:0008630;GO:0010482;GO:0010839;GO:0019901;GO:0030216;GO:0030307;GO:0031424;GO:0042802;GO:0043154;GO:0043588;GO:0043616;GO:0045296;GO:0045606;GO:0046827;GO:0051219;GO:0051726;GO:0061436;GO:0070062;GO:0072089;GO:2000647	K06644	-	O;T	KOG0841;358X7;39RZM;3BFJ4;3CWIY;3J6I6;489D3;4944M;4MF0A;4N3EY	stratifin [Source:HGNC Symbol;Acc:HGNC:10773]	2810	P31947	GO:0000079//regulation of cyclin-dependent protein serine/threonine kinase activity;GO:0001836//release of cytochrome c from mitochondria;GO:0003334//keratinocyte development;GO:0006469//negative regulation of protein kinase activity;GO:0007165//signal transduction;GO:0008104//protein localization;GO:0008630//intrinsic apoptotic signaling pathway in response to DNA damage;GO:0010482//regulation o…	GO:0005576//extracellular region;GO:0005615//extracellular space;GO:0005634//nucleus;GO:0005737//cytoplasm;GO:0005829//cytosol;GO:0070062//extracellular exosome;	GO:0005515//protein binding;GO:0008426//protein kinase C inhibitor activity;GO:0019901//protein kinase binding;GO:0042802//identical protein binding;GO:0045296//cadherin binding;GO:0051219//phosphoprotein binding;	ko04960(Aldosterone-regulated sodium reabsorption);ko04115(p53 signaling pathway);ko04110(Cell cycle)	SFN
ENSG00000114270	379.674	2.63186875074773	3.0488562015255	3.06499980237722	0.867431018893079	0.958990186157244	0.998050629308918	0.3199	-1.645	1.955e-29	2.882e-26	Down Regulation	3	48564073	48595329	-	11133	COL7A1	GO:0004867;GO:0005515;GO:0005576;GO:0005581;GO:0005590;GO:0005604;GO:0005615;GO:0005788;GO:0007155;GO:0008544;GO:0010466;GO:0010951;GO:0030020;GO:0030134;GO:0030414;GO:0033116;GO:0035987;GO:0062023	K16628	-	W;D	KOG3544;35MWU;38CJN;3BAFZ;3CSDK;3J8PF;485KV;491AC;4M5ND;4N5KW	collagen type VII alpha 1 chain [Source:HGNC Symbol;Acc:HGNC:2214]	1294	Q02388;Q59F16	GO:0007155//cell adhesion;GO:0008544//epidermis development;GO:0010466//negative regulation of peptidase activity;GO:0010951//negative regulation of endopeptidase activity;GO:0035987//endodermal cell differentiation;	GO:0005576//extracellular region;GO:0005581//collagen trimer;GO:0005590//collagen type VII trimer;GO:0005604//basement membrane;GO:0005615//extracellular space;GO:0005788//endoplasmic reticulum lumen;GO:0030134//COPII-coated ER to Golgi transport vesicle;GO:0033116//endoplasmic reticulum-Golgi intermediate compartment membrane;GO:0062023//collagen-containing extracellular matrix;	GO:0004867//serine-type endopeptidase inhibitor activity;GO:0005515//protein binding;GO:0030020//extracellular matrix structural constituent conferring tensile strength;GO:0030414//peptidase inhibitor activity;	ko04974(Protein digestion and absorption)	COL7A1
ENSG00000119681	2030.93	20.2045290606193	16.9218167092429	18.5275115353246	6.25977399782279	6.7559157828041	7.09505350889451	0.357	-1.486	2.153e-29	2.886e-26	Down Regulation	14	74498183	74612378	-	9078	LTBP2	GO:0005201;GO:0005509;GO:0005515;GO:0005576;GO:0005615;GO:0006605;GO:0007179;GO:0008201;GO:0009306;GO:0019838;GO:0031012;GO:0050436;GO:0062023;GO:0070062;GO:0097435	K08023	-	O;T	KOG1217;35JPT;38ETY;3BA47;3D231;3J94F;487ID;493PR;4MGKT;4N3E0	latent transforming growth factor beta binding protein 2 [Source:HGNC Symbol;Acc:HGNC:6715]	4053	Q14767	GO:0006605//protein targeting;GO:0007179//transforming growth factor beta receptor signaling pathway;GO:0009306//protein secretion;GO:0097435//supramolecular fiber organization;	GO:0005576//extracellular region;GO:0005615//extracellular space;GO:0031012//extracellular matrix;GO:0062023//collagen-containing extracellular matrix;GO:0070062//extracellular exosome;	GO:0005201//extracellular matrix structural constituent;GO:0005509//calcium ion binding;GO:0005515//protein binding;GO:0008201//heparin binding;GO:0019838//growth factor binding;GO:0050436//microfibril binding;	-	LTBP2
ENSG00000175063	1216.2	90.9424158429955	83.9776256610188	84.4219894161677	18.2309531908836	16.0506321685935	26.8226000021121	0.232	-2.108	4.175e-29	4.575e-26	Down Regulation	20	45812576	45816957	+	1286	UBE2C	GO:0000151;GO:0000166;GO:0000209;GO:0004842;GO:0005515;GO:0005524;GO:0005634;GO:0005654;GO:0005680;GO:0005829;GO:0005886;GO:0006511;GO:0007049;GO:0010458;GO:0010994;GO:0016567;GO:0016740;GO:0019787;GO:0030071;GO:0031145;GO:0031536;GO:0032446;GO:0044389;GO:0051301;GO:0061630;GO:0061631;GO:0070936;GO:0070979;GO:1904668	K06688	EC:2.3.2.23	O	KOG0421;35C18;38MK7;3BICF;3CSMQ;3JFSS;480G1;490A4;4M9DT;4N4TB	ubiquitin conjugating enzyme E2 C [Source:HGNC Symbol;Acc:HGNC:15937]	11065	O00762;Q5TZN3	GO:0000209//protein polyubiquitination;GO:0006511//ubiquitin-dependent protein catabolic process;GO:0007049//cell cycle;GO:0010458//exit from mitosis;GO:0010994//free ubiquitin chain polymerization;GO:0016567//protein ubiquitination;GO:0030071//regulation of mitotic metaphase/anaphase transition;GO:0031145//anaphase-promoting complex-dependent catabolic process;GO:0031536//positive regulation of …	GO:0000151//ubiquitin ligase complex;GO:0005634//nucleus;GO:0005654//nucleoplasm;GO:0005680//anaphase-promoting complex;GO:0005829//cytosol;GO:0005886//plasma membrane;	GO:0000166//nucleotide binding;GO:0004842//ubiquitin-protein transferase activity;GO:0005515//protein binding;GO:0005524//ATP binding;GO:0016740//transferase activity;GO:0019787//ubiquitin-like protein transferase activity;GO:0044389//ubiquitin-like protein ligase binding;GO:0061630//ubiquitin protein ligase activity;GO:0061631//ubiquitin conjugating enzyme activity;	ko04120(Ubiquitin mediated proteolysis)	UBE2C
ENSG00000184371	3018.34	49.0537757722632	42.6000768249598	48.8470380459727	19.5875928047734	16.747752981567	18.4621840892803	0.3851	-1.377	4.269e-29	4.575e-26	Down Regulation	1	109910242	109930992	+	5238	CSF1	GO:0001503;GO:0001780;GO:0001954;GO:0002158;GO:0002376;GO:0002687;GO:0002931;GO:0003006;GO:0005125;GO:0005157;GO:0005515;GO:0005576;GO:0005615;GO:0005788;GO:0005886;GO:0006954;GO:0007165;GO:0007169;GO:0007265;GO:0008083;GO:0008283;GO:0008284;GO:0009612;GO:0010628;GO:0010743;GO:0010744;GO:0010759;GO:0014070;GO:0016020;GO:0016021;GO:0016604;GO:0030224;GO:0030225;GO:0030278;GO:0030316;GO:0030335;GO:…	K05453	-	S;T	2S271;35DSE;39SXJ;3BNBH;3D3VU;3JF7X;489PX;49804;4MFJG;4MZ8T	colony stimulating factor 1 [Source:HGNC Symbol;Acc:HGNC:2432]	1435	P09603;A0A024R0A1	GO:0001503//ossification;GO:0001780//neutrophil homeostasis;GO:0001954//positive regulation of cell-matrix adhesion;GO:0002158//osteoclast proliferation;GO:0002376//immune system process;GO:0002687//positive regulation of leukocyte migration;GO:0002931//response to ischemia;GO:0003006//developmental process involved in reproduction;GO:0006954//inflammatory response;GO:0007165//signal transduction…	GO:0005576//extracellular region;GO:0005615//extracellular space;GO:0005788//endoplasmic reticulum lumen;GO:0005886//plasma membrane;GO:0016020//membrane;GO:0016021//integral component of membrane;GO:0016604//nuclear body;GO:0048471//perinuclear region of cytoplasm;GO:1990682//CSF1-CSF1R complex;	GO:0005125//cytokine activity;GO:0005157//macrophage colony-stimulating factor receptor binding;GO:0005515//protein binding;GO:0008083//growth factor activity;GO:0042802//identical protein binding;GO:0042803//protein homodimerization activity;	ko05323(Rheumatoid arthritis);ko05022(Pathways of neurodegeneration - multiple diseases);ko05010(Alzheimer disease);ko04668(TNF signaling pathway);ko04640(Hematopoietic cell lineage);ko04380(Osteoclast differentiation);ko04151(PI3K-Akt signaling pathway);ko04061(Viral protein interaction with cytokine and cytokine receptor);ko04060(Cytokine-cytokine receptor interaction);ko04015(Rap1 signaling pa…	CSF1
ENSG00000184363	274.997	6.57261408350308	6.06819371852802	6.5024844611348	1.8386509350866	1.54730981775197	2.02699257940338	0.2791	-1.841	4.344e-29	4.575e-26	Down Regulation	11	392614	404908	+	3795	PKP3	GO:0001533;GO:0002159;GO:0005515;GO:0005634;GO:0005654;GO:0005737;GO:0005886;GO:0005911;GO:0005912;GO:0007043;GO:0007155;GO:0010628;GO:0019899;GO:0030054;GO:0030057;GO:0045294;GO:0045296;GO:0050839;GO:0070161;GO:0072659;GO:0098609;GO:0098641;GO:1902373;GO:1990124	-	-	S;T;W;K	KOG1048;35CU5;38H59;3BG19;3CUNW;3J1Q6;485SH;494VX;4MGXT;4MSWY	plakophilin 3 [Source:HGNC Symbol;Acc:HGNC:9025]	11187	Q9Y446	GO:0002159//desmosome assembly;GO:0007043//cell-cell junction assembly;GO:0007155//cell adhesion;GO:0010628//positive regulation of gene expression;GO:0072659//protein localization to plasma membrane;GO:0098609//cell-cell adhesion;GO:1902373//negative regulation of mRNA catabolic process;	GO:0001533//cornified envelope;GO:0005634//nucleus;GO:0005654//nucleoplasm;GO:0005737//cytoplasm;GO:0005886//plasma membrane;GO:0005911//cell-cell junction;GO:0005912//adherens junction;GO:0030054//cell junction;GO:0030057//desmosome;GO:0070161//anchoring junction;GO:1990124//messenger ribonucleoprotein complex;	GO:0005515//protein binding;GO:0019899//enzyme binding;GO:0045294//alpha-catenin binding;GO:0045296//cadherin binding;GO:0050839//cell adhesion molecule binding;GO:0098641//cadherin binding involved in cell-cell adhesion;	-	PKP3
ENSG00000070669	176.18	0.255752077416018	0.401254445947412	0.265274859498695	4.4921667282182	4.40974870445925	2.41909940530357	12.2293	3.6123	6.842e-29	6.725e-26	Up Regulation	7	97851677	97872542	-	4896	ASNS	GO:0000166;GO:0004066;GO:0005515;GO:0005524;GO:0005829;GO:0006529;GO:0006541;GO:0008652;GO:0016874;GO:0042149;GO:0043066;GO:0045931;GO:0070981	K01953	EC:6.3.5.4	E	KOG0571;35IRG;38H99;3BECT;3CXBR;3J4PC;480MI;48ZD5;4MDSQ;4N5QI	asparagine synthetase (glutamine-hydrolyzing) [Source:HGNC Symbol;Acc:HGNC:753]	440	P08243	GO:0006529//asparagine biosynthetic process;GO:0006541//glutamine metabolic process;GO:0008652//cellular amino acid biosynthetic process;GO:0042149//cellular response to glucose starvation;GO:0043066//negative regulation of apoptotic process;GO:0045931//positive regulation of mitotic cell cycle;GO:0070981//L-asparagine biosynthetic process;	GO:0005829//cytosol;	GO:0000166//nucleotide binding;GO:0004066//asparagine synthase (glutamine-hydrolyzing) activity;GO:0005515//protein binding;GO:0005524//ATP binding;GO:0016874//ligase activity;	ko00250(Alanine, aspartate and glutamate metabolism)	ASNS
ENSG00000204175	196.55	1.79430127740431	2.05904984154636	2.14618441611131	0.408233123991183	0.232602129465982	0.4270664205072	0.1759	-2.508	1.416e-28	1.304e-25	Down Regulation	10	46541736	46556658	-	9435	GPRIN2	GO:0005515;GO:0005886;GO:0031175	-	-	S	2SG81;35KBT;39K5Q;3BI76;3D0NX;3J2M3;4809U;497JZ;4MDHV;4MUCQ	G protein regulated inducer of neurite outgrowth 2 [Source:HGNC Symbol;Acc:HGNC:23730]	9721	O60269	GO:0031175//neuron projection development;	GO:0005886//plasma membrane;	GO:0005515//protein binding;	-	GPRIN2
ENSG00000165474	599.358	20.6905374097245	25.0574805501582	23.0272692765105	3.94856605420983	3.30851614224249	6.19394607584847	0.1928	-2.375	1.942e-28	1.649e-25	Down Regulation	13	20187463	20192938	-	2474	GJB2	GO:0002931;GO:0005243;GO:0005509;GO:0005515;GO:0005737;GO:0005793;GO:0005829;GO:0005886;GO:0005887;GO:0005921;GO:0005922;GO:0007154;GO:0007267;GO:0007565;GO:0007568;GO:0007605;GO:0010644;GO:0016020;GO:0016021;GO:0016264;GO:0016328;GO:0030054;GO:0032355;GO:0032496;GO:0032526;GO:0032570;GO:0034599;GO:0042802;GO:0044297;GO:0044752;GO:0046677;GO:0046697;GO:0046872;GO:0048471;GO:0048839;GO:0055085;GO:…	K07621	-	S;T;U	2QWM8;359A2;38I4N;3BI5Y;3CU3M;3JAAM;48393;48X7W;4MH5Q;4MX4R	gap junction protein beta 2 [Source:HGNC Symbol;Acc:HGNC:4284]	2706	P29033;H9U1J4	GO:0002931//response to ischemia;GO:0007154//cell communication;GO:0007267//cell-cell signaling;GO:0007565//female pregnancy;GO:0007568//aging;GO:0007605//sensory perception of sound;GO:0010644//cell communication by electrical coupling;GO:0016264//gap junction assembly;GO:0032355//response to estradiol;GO:0032496//response to lipopolysaccharide;GO:0032526//response to retinoic acid;GO:0032570//r…	GO:0005737//cytoplasm;GO:0005793//endoplasmic reticulum-Golgi intermediate compartment;GO:0005829//cytosol;GO:0005886//plasma membrane;GO:0005887//integral component of plasma membrane;GO:0005921//gap junction;GO:0005922//connexin complex;GO:0016020//membrane;GO:0016021//integral component of membrane;GO:0016328//lateral plasma membrane;GO:0030054//cell junction;GO:0044297//cell body;GO:0048471//…	GO:0005243//gap junction channel activity;GO:0005509//calcium ion binding;GO:0005515//protein binding;GO:0042802//identical protein binding;GO:0046872//metal ion binding;GO:1903763//gap junction channel activity involved in cell communication by electrical coupling;	-	GJB2
ENSG00000071539	1052.32	30.5740350527797	26.6358480057649	27.3567123889784	6.76113884919257	6.50501044201039	9.56509934670183	0.266	-1.911	2.014e-28	1.649e-25	Down Regulation	5	892884	919357	+	3319	TRIP13	GO:0000166;GO:0001556;GO:0001673;GO:0003712;GO:0005515;GO:0005524;GO:0005634;GO:0005694;GO:0006302;GO:0006354;GO:0006366;GO:0007094;GO:0007130;GO:0007131;GO:0007141;GO:0007144;GO:0007283;GO:0007286;GO:0016887;GO:0030154;GO:0042802;GO:0048477;GO:0051321;GO:0051598	K22399	-	O;L	KOG0744;35JG4;38HYG;3BD53;3CVJN;3J620;4899G;48VEP;4MIPB;4N662	thyroid hormone receptor interactor 13 [Source:HGNC Symbol;Acc:HGNC:12307]	9319	Q15645	GO:0001556//oocyte maturation;GO:0006302//double-strand break repair;GO:0006354//DNA-templated transcription, elongation;GO:0006366//transcription by RNA polymerase II;GO:0007094//mitotic spindle assembly checkpoint signaling;GO:0007130//synaptonemal complex assembly;GO:0007131//reciprocal meiotic recombination;GO:0007141//male meiosis I;GO:0007144//female meiosis I;GO:0007283//spermatogenesis;GO…	GO:0001673//male germ cell nucleus;GO:0005634//nucleus;GO:0005694//chromosome;	GO:0000166//nucleotide binding;GO:0003712//transcription coregulator activity;GO:0005515//protein binding;GO:0005524//ATP binding;GO:0016887//ATP hydrolysis activity;GO:0042802//identical protein binding;	-	TRIP13
ENSG00000071242	320.794	0.254954847573437	0.324077036455406	0.357748843695423	4.59371705033167	5.48493919761833	2.17537502007234	13.0805	3.7093	8.96e-28	6.952e-25	Up Regulation	6	166409364	166906451	-	8251	RPS6KA2	GO:0000166;GO:0000287;GO:0001556;GO:0002035;GO:0004672;GO:0004674;GO:0004711;GO:0004712;GO:0005515;GO:0005524;GO:0005634;GO:0005654;GO:0005737;GO:0005819;GO:0005829;GO:0005840;GO:0006468;GO:0007165;GO:0007268;GO:0007507;GO:0008285;GO:0010628;GO:0010659;GO:0016301;GO:0016310;GO:0016740;GO:0018105;GO:0035556;GO:0043065;GO:0045202;GO:0045786;GO:0045835;GO:0046872;GO:0060047;GO:0070613;GO:0071322;GO:…	K04373	EC:2.7.11.1	T;G	KOG0603;35GTN;3AMZM;3BAGS;3CRGH;3J5UD;4883N;492RQ;4M832;4MUEX	ribosomal protein S6 kinase A2 [Source:HGNC Symbol;Acc:HGNC:10431]	6196	Q15349	GO:0001556//oocyte maturation;GO:0002035//brain renin-angiotensin system;GO:0006468//protein phosphorylation;GO:0007165//signal transduction;GO:0007268//chemical synaptic transmission;GO:0007507//heart development;GO:0008285//negative regulation of cell population proliferation;GO:0010628//positive regulation of gene expression;GO:0010659//cardiac muscle cell apoptotic process;GO:0016310//phospho…	GO:0005634//nucleus;GO:0005654//nucleoplasm;GO:0005737//cytoplasm;GO:0005819//spindle;GO:0005829//cytosol;GO:0005840//ribosome;GO:0045202//synapse;GO:0072687//meiotic spindle;	GO:0000166//nucleotide binding;GO:0000287//magnesium ion binding;GO:0004672//protein kinase activity;GO:0004674//protein serine/threonine kinase activity;GO:0004711//ribosomal protein S6 kinase activity;GO:0004712//protein serine/threonine/tyrosine kinase activity;GO:0005515//protein binding;GO:0005524//ATP binding;GO:0016301//kinase activity;GO:0016740//transferase activity;GO:0046872//metal ion…	ko05207(Chemical carcinogenesis - receptor activation);ko05135(Yersinia infection);ko04931(Insulin resistance);ko04914(Progesterone-mediated oocyte maturation);ko04722(Neurotrophin signaling pathway);ko04720(Long-term potentiation);ko04714(Thermogenesis);ko04150(mTOR signaling pathway);ko04114(Oocyte meiosis);ko04010(MAPK signaling pathway)	RPS6KA2
ENSG00000196154	2554.46	210.246764530886	255.893448437938	209.495658059703	77.4773296586236	70.5994180058853	93.3836379223751	0.3534	-1.501	5.031e-27	3.708e-24	Down Regulation	1	153543613	153550136	-	946	S100A4	GO:0001837;GO:0003723;GO:0003779;GO:0005509;GO:0005515;GO:0005576;GO:0005615;GO:0005634;GO:0005737;GO:0042802;GO:0043005;GO:0043123;GO:0046872;GO:0046914;GO:0048306;GO:0048471;GO:0050786;GO:0062023;GO:0070062	K23761	-	S	2S4AU;35QCW;3A4P5;3BRN5;3D8AS;3JH4M;48FGC;49C24;4MJK0;4N71S	S100 calcium binding protein A4 [Source:HGNC Symbol;Acc:HGNC:10494]	6275	P26447	GO:0001837//epithelial to mesenchymal transition;GO:0043123//positive regulation of I-kappaB kinase/NF-kappaB signaling;	GO:0005576//extracellular region;GO:0005615//extracellular space;GO:0005634//nucleus;GO:0005737//cytoplasm;GO:0043005//neuron projection;GO:0048471//perinuclear region of cytoplasm;GO:0062023//collagen-containing extracellular matrix;GO:0070062//extracellular exosome;	GO:0003723//RNA binding;GO:0003779//actin binding;GO:0005509//calcium ion binding;GO:0005515//protein binding;GO:0042802//identical protein binding;GO:0046872//metal ion binding;GO:0046914//transition metal ion binding;GO:0048306//calcium-dependent protein binding;GO:0050786//RAGE receptor binding;	-	S100A4
ENSG00000156475	190.414	1.15923904151089	1.27505160017147	1.3186522492823	0.3240186589823	0.291991725343594	0.376803176038982	0.2615	-1.935	8.019e-27	5.63e-24	Down Regulation	5	146580742	147084784	-	13610	PPP2R2B	GO:0000159;GO:0005515;GO:0005737;GO:0005739;GO:0005741;GO:0005829;GO:0005856;GO:0006915;GO:0016020;GO:0019888;GO:0050790	K04354	-	T	KOG1354;35MW4;38CMI;3BCYE;3CS6J;3J4IV;4831A;48VPR;4MHZC;4N1BH	protein phosphatase 2 regulatory subunit Bbeta [Source:HGNC Symbol;Acc:HGNC:9305]	5521	Q00005	GO:0006915//apoptotic process;GO:0050790//regulation of catalytic activity;	GO:0000159//protein phosphatase type 2A complex;GO:0005737//cytoplasm;GO:0005739//mitochondrion;GO:0005741//mitochondrial outer membrane;GO:0005829//cytosol;GO:0005856//cytoskeleton;GO:0016020//membrane;	GO:0005515//protein binding;GO:0019888//protein phosphatase regulator activity;	ko05165(Human papillomavirus infection);ko05160(Hepatitis C);ko05142(Chagas disease);ko04728(Dopaminergic synapse);ko04530(Tight junction);ko04390(Hippo signaling pathway);ko04261(Adrenergic signaling in cardiomyocytes);ko04152(AMPK signaling pathway);ko04151(PI3K-Akt signaling pathway);ko04071(Sphingolipid signaling pathway);ko03015(mRNA surveillance pathway)	PPP2R2B
ENSG00000101210	1628.44	24.6384831663691	26.7877667660839	24.8082114319234	12.7697622042497	12.4256096118893	13.1185197275879	0.4974	-1.007	2.088e-26	1.399e-23	Down Regulation	20	63488013	63499239	-	4826	EEF1A2	GO:0000166;GO:0003746;GO:0003924;GO:0005515;GO:0005525;GO:0005737;GO:0005853;GO:0006412;GO:0006414;GO:0008135;GO:0019901;GO:0043065;GO:0045202;GO:0090218;GO:0098574;GO:1904714	K03231	-	J	KOG0052;35ERK;38G33;3BB5I;3CZIS;3J48S;487AZ;490DH;4MQZK;4N817	eukaryotic translation elongation factor 1 alpha 2 [Source:HGNC Symbol;Acc:HGNC:3192]	1917	Q05639	GO:0006412//translation;GO:0006414//translational elongation;GO:0043065//positive regulation of apoptotic process;GO:0090218//positive regulation of lipid kinase activity;GO:1904714//regulation of chaperone-mediated autophagy;	GO:0005737//cytoplasm;GO:0005853//eukaryotic translation elongation factor 1 complex;GO:0045202//synapse;GO:0098574//cytoplasmic side of lysosomal membrane;	GO:0000166//nucleotide binding;GO:0003746//translation elongation factor activity;GO:0003924//GTPase activity;GO:0005515//protein binding;GO:0005525//GTP binding;GO:0008135//translation factor activity, RNA binding;GO:0019901//protein kinase binding;	ko05140(Leishmaniasis);ko05134(Legionellosis);ko03013(Nucleocytoplasmic transport)	EEF1A2
ENSG00000070814	2158.09	15.1279667834761	14.2401656505648	15.9317466294337	5.82174847192503	5.84372436197057	7.01828639912545	0.4074	-1.295	7.11e-26	4.557e-23	Down Regulation	5	150357629	150400308	+	11439	TCOF1	GO:0001501;GO:0001650;GO:0003723;GO:0005515;GO:0005634;GO:0005654;GO:0005730;GO:0005829;GO:0006417;GO:0014029;GO:0014032;GO:0030674;GO:0042790;GO:0046982;GO:0097110	K14562	-	S;K	2S41N;3597W;398MY;3BHQH;3D1VR;3J51Q;483JB;48XEZ;4MBU1;4N3NW	treacle ribosome biogenesis factor 1 [Source:HGNC Symbol;Acc:HGNC:11654]	6949	Q13428	GO:0001501//skeletal system development;GO:0006417//regulation of translation;GO:0014029//neural crest formation;GO:0014032//neural crest cell development;GO:0042790//nucleolar large rRNA transcription by RNA polymerase I;	GO:0001650//fibrillar center;GO:0005634//nucleus;GO:0005654//nucleoplasm;GO:0005730//nucleolus;GO:0005829//cytosol;	GO:0003723//RNA binding;GO:0005515//protein binding;GO:0030674//protein-macromolecule adaptor activity;GO:0046982//protein heterodimerization activity;GO:0097110//scaffold protein binding;	ko03008(Ribosome biogenesis in eukaryotes)	TCOF1
ENSG00000075461	437.613	9.5755633508763	10.5699133760258	10.1990251413667	3.50539339591866	4.02266004810483	3.54413226142376	0.3617	-1.467	1.08e-25	6.633e-23	Down Regulation	17	66964707	67033398	+	3583	CACNG4	GO:0005244;GO:0005245;GO:0005246;GO:0005262;GO:0005886;GO:0005887;GO:0005891;GO:0006811;GO:0006816;GO:0009986;GO:0014069;GO:0016020;GO:0016021;GO:0016247;GO:0019226;GO:0030666;GO:0032281;GO:0034765;GO:0035255;GO:0036477;GO:0042220;GO:0044297;GO:0051968;GO:0070588;GO:0098839;GO:0098943;GO:0098962;GO:0098970;GO:0098978;GO:0099061;GO:0099590;GO:1990454;GO:2000311;GO:2000969	K04869	-	P	2QPQH;35BP5;38W1P;3BJ3R;3CYC5;3J9MZ;489EA;48X05;4MIGS;4MUNU	calcium voltage-gated channel auxiliary subunit gamma 4 [Source:HGNC Symbol;Acc:HGNC:1408]	27092	Q9UBN1;A0A024R8J8	GO:0006811//ion transport;GO:0006816//calcium ion transport;GO:0019226//transmission of nerve impulse;GO:0034765//regulation of ion transmembrane transport;GO:0042220//response to cocaine;GO:0051968//positive regulation of synaptic transmission, glutamatergic;GO:0070588//calcium ion transmembrane transport;GO:0098943//neurotransmitter receptor transport, postsynaptic endosome to lysosome;GO:00989…	GO:0005886//plasma membrane;GO:0005887//integral component of plasma membrane;GO:0005891//voltage-gated calcium channel complex;GO:0009986//cell surface;GO:0014069//postsynaptic density;GO:0016020//membrane;GO:0016021//integral component of membrane;GO:0030666//endocytic vesicle membrane;GO:0032281//AMPA glutamate receptor complex;GO:0036477//somatodendritic compartment;GO:0044297//cell body;GO:0…	GO:0005244//voltage-gated ion channel activity;GO:0005245//voltage-gated calcium channel activity;GO:0005246//calcium channel regulator activity;GO:0005262//calcium channel activity;GO:0016247//channel regulator activity;GO:0035255//ionotropic glutamate receptor binding;	ko05414(Dilated cardiomyopathy);ko05412(Arrhythmogenic right ventricular cardiomyopathy);ko05410(Hypertrophic cardiomyopathy);ko04921(Oxytocin signaling pathway);ko04261(Adrenergic signaling in cardiomyocytes);ko04260(Cardiac muscle contraction);ko04010(MAPK signaling pathway)	CACNG4
ENSG00000111981	422.18	1.99659617429697	2.37928516064737	1.94885883020292	13.8727844990984	15.7935469563441	8.68898982008267	6.0358	2.5935	1.99e-25	1.174e-22	Up Regulation	6	149963943	149973715	+	3211	ULBP1	GO:0002376;GO:0005515;GO:0005615;GO:0005783;GO:0005829;GO:0005886;GO:0009897;GO:0016020;GO:0030101;GO:0031225;GO:0042267;GO:0046658;GO:0046703	K07986	-	S;T	2TM6M;35Q80;3A2IJ;3BQV5;3D78K;3JH0M;48EUM;49BNJ;4MM9G;4MUHV	UL16 binding protein 1 [Source:HGNC Symbol;Acc:HGNC:14893]	80329	Q9BZM6	GO:0002376//immune system process;GO:0030101//natural killer cell activation;GO:0042267//natural killer cell mediated cytotoxicity;	GO:0005615//extracellular space;GO:0005783//endoplasmic reticulum;GO:0005829//cytosol;GO:0005886//plasma membrane;GO:0009897//external side of plasma membrane;GO:0016020//membrane;GO:0031225//anchored component of membrane;GO:0046658//anchored component of plasma membrane;	GO:0005515//protein binding;GO:0046703//natural killer cell lectin-like receptor binding;	ko04650(Natural killer cell mediated cytotoxicity)	ULBP1
ENSG00000119922	1027.81	20.7941124287357	19.9436259708342	19.7468049995463	5.56149830553809	6.54012020748839	7.94539099183337	0.3274	-1.611	2.076e-25	1.177e-22	Down Regulation	10	89283694	89309271	+	4326	IFIT2	GO:0002376;GO:0003723;GO:0005515;GO:0005737;GO:0005783;GO:0005829;GO:0006915;GO:0008637;GO:0009615;GO:0032091;GO:0035457;GO:0043065;GO:0045087;GO:0051607	K24848	-	S;O	KOG1124;35BBX;38BI4;3BH0D;3D3EN;3JFI1;489T6;496VK;4MCF0;4N0ES	interferon induced protein with tetratricopeptide repeats 2 [Source:HGNC Symbol;Acc:HGNC:5409]	3433	P09913;Q05DN2	GO:0002376//immune system process;GO:0006915//apoptotic process;GO:0008637//apoptotic mitochondrial changes;GO:0009615//response to virus;GO:0032091//negative regulation of protein binding;GO:0035457//cellular response to interferon-alpha;GO:0043065//positive regulation of apoptotic process;GO:0045087//innate immune response;GO:0051607//defense response to virus;	GO:0005737//cytoplasm;GO:0005783//endoplasmic reticulum;GO:0005829//cytosol;	GO:0003723//RNA binding;GO:0005515//protein binding;	-	IFIT2
ENSG00000166825	4167.71	85.7505271146889	64.1631782365468	77.2986451904458	15.8083315842664	13.4354696125253	23.0242205114605	0.2261	-2.145	1.144e-24	6.248e-22	Down Regulation	15	89784895	89815401	-	5046	ANPEP	GO:0001525;GO:0001618;GO:0004177;GO:0005615;GO:0005737;GO:0005765;GO:0005793;GO:0005886;GO:0006508;GO:0007165;GO:0008217;GO:0008233;GO:0008237;GO:0008270;GO:0009897;GO:0016020;GO:0016021;GO:0016787;GO:0030154;GO:0030667;GO:0038023;GO:0042277;GO:0043171;GO:0046718;GO:0046872;GO:0070006;GO:0070062	K11140	EC:3.4.11.2	O;E	KOG1046;35FRE;38CFG;3BD0T;3CUKR;3J227;489DU;493AI;4M864;4N5M8	alanyl aminopeptidase, membrane [Source:HGNC Symbol;Acc:HGNC:500]	290	P15144;A0A024RC61;Q59E93	GO:0001525//angiogenesis;GO:0006508//proteolysis;GO:0007165//signal transduction;GO:0008217//regulation of blood pressure;GO:0030154//cell differentiation;GO:0043171//peptide catabolic process;GO:0046718//viral entry into host cell;	GO:0005615//extracellular space;GO:0005737//cytoplasm;GO:0005765//lysosomal membrane;GO:0005793//endoplasmic reticulum-Golgi intermediate compartment;GO:0005886//plasma membrane;GO:0009897//external side of plasma membrane;GO:0016020//membrane;GO:0016021//integral component of membrane;GO:0030667//secretory granule membrane;GO:0070062//extracellular exosome;	GO:0001618//virus receptor activity;GO:0004177//aminopeptidase activity;GO:0008233//peptidase activity;GO:0008237//metallopeptidase activity;GO:0008270//zinc ion binding;GO:0016787//hydrolase activity;GO:0038023//signaling receptor activity;GO:0042277//peptide binding;GO:0046872//metal ion binding;GO:0070006//metalloaminopeptidase activity;	ko04640(Hematopoietic cell lineage);ko04614(Renin-angiotensin system);ko00480(Glutathione metabolism)	ANPEP
ENSG00000005001	105.929	5.06327320835481	4.28049625391551	4.11070828648435	0.585375863981011	0.273678260550369	0.717042956640177	0.1151	-3.119	1.926e-24	1.014e-21	Down Regulation	16	2852730	2858170	-	2384	PRSS22	GO:0004252;GO:0005576;GO:0005615;GO:0006508;GO:0008233;GO:0008236;GO:0010952;GO:0016504;GO:0016787	K09626	EC:3.4.21.-	O;E	KOG3627;35MA8;38EW9;3BK4B;3CV7V;3J45H;487PA;496YS;4M8HN;4N2P5	serine protease 22 [Source:HGNC Symbol;Acc:HGNC:14368]	64063	Q9GZN4	GO:0006508//proteolysis;GO:0010952//positive regulation of peptidase activity;	GO:0005576//extracellular region;GO:0005615//extracellular space;	GO:0004252//serine-type endopeptidase activity;GO:0008233//peptidase activity;GO:0008236//serine-type peptidase activity;GO:0016504//peptidase activator activity;GO:0016787//hydrolase activity;	-	PRSS22
ENSG00000154127	1490.84	13.4603242749149	13.2225963071506	13.962038607277	4.50233186606567	5.55154647351624	5.6801211225759	0.3831	-1.384	2.251e-24	1.144e-21	Down Regulation	11	122655722	122814473	+	8964	UBASH3B	GO:0004721;GO:0004725;GO:0005515;GO:0005634;GO:0005737;GO:0006469;GO:0007165;GO:0009968;GO:0016787;GO:0030168;GO:0031625;GO:0035335;GO:0038063;GO:0038065;GO:0042802;GO:0043393;GO:0045670;GO:0045671;GO:0045779;GO:0051219;GO:0051279;GO:0070527;GO:0090331	K18993	EC:3.1.3.48	T;G	KOG3734;35H54;38QFA;3BD6T;3CRB2;3J7QU;482WJ;48X5E;4MFHR;4N566	ubiquitin associated and SH3 domain containing B [Source:HGNC Symbol;Acc:HGNC:29884]	84959	Q8TF42	GO:0006469//negative regulation of protein kinase activity;GO:0007165//signal transduction;GO:0009968//negative regulation of signal transduction;GO:0030168//platelet activation;GO:0035335//peptidyl-tyrosine dephosphorylation;GO:0038063//collagen-activated tyrosine kinase receptor signaling pathway;GO:0038065//collagen-activated signaling pathway;GO:0043393//regulation of protein binding;GO:00456…	GO:0005634//nucleus;GO:0005737//cytoplasm;	GO:0004721//phosphoprotein phosphatase activity;GO:0004725//protein tyrosine phosphatase activity;GO:0005515//protein binding;GO:0016787//hydrolase activity;GO:0031625//ubiquitin protein ligase binding;GO:0042802//identical protein binding;GO:0051219//phosphoprotein binding;	-	UBASH3B
ENSG00000078081	649.938	1.1512613884228	1.34083652109455	1.45054727063554	17.4469660096323	28.4422934134989	8.2261701113549	13.7504	3.7814	2.709e-24	1.331e-21	Up Regulation	3	183122215	183163839	-	3785	LAMP3	GO:0002250;GO:0002376;GO:0005764;GO:0005765;GO:0005768;GO:0005769;GO:0005886;GO:0009986;GO:0010008;GO:0010506;GO:0010628;GO:0016020;GO:0016021;GO:0030659;GO:0031410;GO:0031901;GO:0031902;GO:0031982;GO:0035455;GO:0043154;GO:0043231;GO:0048471;GO:0072594;GO:0097233;GO:1901799;GO:1903900	K06562	-	S;J	KOG4818;35BK4;39Y61;3BEP8;3CZNV;3J7Q7;487M0;493AF;4M9A0;4MXS4	lysosomal associated membrane protein 3 [Source:HGNC Symbol;Acc:HGNC:14582]	27074	Q9UQV4	GO:0002250//adaptive immune response;GO:0002376//immune system process;GO:0010506//regulation of autophagy;GO:0010628//positive regulation of gene expression;GO:0035455//response to interferon-alpha;GO:0043154//negative regulation of cysteine-type endopeptidase activity involved in apoptotic process;GO:0072594//establishment of protein localization to organelle;GO:1901799//negative regulation of …	GO:0005764//lysosome;GO:0005765//lysosomal membrane;GO:0005768//endosome;GO:0005769//early endosome;GO:0005886//plasma membrane;GO:0009986//cell surface;GO:0010008//endosome membrane;GO:0016020//membrane;GO:0016021//integral component of membrane;GO:0030659//cytoplasmic vesicle membrane;GO:0031410//cytoplasmic vesicle;GO:0031901//early endosome membrane;GO:0031902//late endosome membrane;GO:00319…	-	ko04142(Lysosome)	LAMP3
ENSG00000128965	423.601	1.90480057221352	2.5276486794932	3.10865779237192	23.6513083550659	26.4033470363836	12.5614618729877	8.295	3.0522	3.414e-24	1.624e-21	Up Regulation	15	40952962	40956512	+	2051	CHAC1	GO:0003839;GO:0005112;GO:0005515;GO:0005737;GO:0005794;GO:0005802;GO:0005829;GO:0006750;GO:0006751;GO:0006915;GO:0006986;GO:0007219;GO:0007399;GO:0010955;GO:0016829;GO:0022008;GO:0045746;GO:0061928;GO:0070059	K07232	EC:4.3.2.7	-	-	ChaC glutathione specific gamma- glutamylcyclotransferase 1 [Source:HGNC Symbol;Acc:HGNC:28680]	79094	Q9BUX1	GO:0006750//glutathione biosynthetic process;GO:0006751//glutathione catabolic process;GO:0006915//apoptotic process;GO:0006986//response to unfolded protein;GO:0007219//Notch signaling pathway;GO:0007399//nervous system development;GO:0010955//negative regulation of protein processing;GO:0022008//neurogenesis;GO:0045746//negative regulation of Notch signaling pathway;GO:0070059//intrinsic apopto…	GO:0005737//cytoplasm;GO:0005794//Golgi apparatus;GO:0005802//trans-Golgi network;GO:0005829//cytosol;	GO:0003839//gamma-glutamylcyclotransferase activity;GO:0005112//Notch binding;GO:0005515//protein binding;GO:0016829//lyase activity;GO:0061928//glutathione specific gamma-glutamylcyclotransferase activity;	ko00480(Glutathione metabolism)	CHAC1
ENSG00000104356	396.053	7.75479475078176	6.40420931641823	7.2077781578474	1.95380794856269	1.78294776199681	2.51394218746166	0.2881	-1.795	6.373e-24	2.936e-21	Down Regulation	8	98117293	98159835	+	4857	POP1	GO:0000172;GO:0001682;GO:0003723;GO:0004526;GO:0005515;GO:0005615;GO:0005634;GO:0005654;GO:0005655;GO:0005730;GO:0008033;GO:0016078;GO:0030681;GO:0033204;GO:0090502	K01164	EC:3.1.26.5	A;D	KOG3322;35C0E;38HEX;3BAKK;3CZRN;3J4PD;48792;48ZHA;4MEJ3;4N1BQ	POP1 homolog, ribonuclease P/MRP subunit [Source:HGNC Symbol;Acc:HGNC:30129]	10940	Q99575	GO:0001682//tRNA 5'-leader removal;GO:0008033//tRNA processing;GO:0016078//tRNA catabolic process;GO:0090502//RNA phosphodiester bond hydrolysis, endonucleolytic;	GO:0000172//ribonuclease MRP complex;GO:0005615//extracellular space;GO:0005634//nucleus;GO:0005654//nucleoplasm;GO:0005655//nucleolar ribonuclease P complex;GO:0005730//nucleolus;GO:0030681//multimeric ribonuclease P complex;	GO:0003723//RNA binding;GO:0004526//ribonuclease P activity;GO:0005515//protein binding;GO:0033204//ribonuclease P RNA binding;	ko03008(Ribosome biogenesis in eukaryotes)	POP1
ENSG00000188064	754.304	15.7161141781098	12.1172523708466	14.4800196607336	2.41746404047843	1.79808772128526	3.71354046869183	0.1839	-2.443	7.381e-24	3.297e-21	Down Regulation	22	45920366	45977162	-	5080	WNT7B	GO:0001701;GO:0003338;GO:0005102;GO:0005109;GO:0005125;GO:0005515;GO:0005576;GO:0005615;GO:0005737;GO:0005788;GO:0005796;GO:0005886;GO:0007275;GO:0009888;GO:0016055;GO:0016332;GO:0021871;GO:0022009;GO:0030154;GO:0030182;GO:0030324;GO:0030666;GO:0031175;GO:0032364;GO:0032536;GO:0042592;GO:0045165;GO:0045669;GO:0046330;GO:0048018;GO:0048144;GO:0048568;GO:0048731;GO:0048812;GO:0050808;GO:0051384;GO:…	K00572	-	M;T	KOG3913;35GCW;38K2G;3B9HW;3CS9G;3JB35;47ZM9;493RX;4MF0M;4MW29	Wnt family member 7B [Source:HGNC Symbol;Acc:HGNC:12787]	7477	P56706	GO:0001701//in utero embryonic development;GO:0003338//metanephros morphogenesis;GO:0007275//multicellular organism development;GO:0009888//tissue development;GO:0016055//Wnt signaling pathway;GO:0016332//establishment or maintenance of polarity of embryonic epithelium;GO:0021871//forebrain regionalization;GO:0022009//central nervous system vasculogenesis;GO:0030154//cell differentiation;GO:00301…	GO:0005576//extracellular region;GO:0005615//extracellular space;GO:0005737//cytoplasm;GO:0005788//endoplasmic reticulum lumen;GO:0005796//Golgi lumen;GO:0005886//plasma membrane;GO:0030666//endocytic vesicle membrane;GO:0070062//extracellular exosome;	GO:0005102//signaling receptor binding;GO:0005109//frizzled binding;GO:0005125//cytokine activity;GO:0005515//protein binding;GO:0048018//receptor ligand activity;	ko05226(Gastric cancer);ko05225(Hepatocellular carcinoma);ko05224(Breast cancer);ko05217(Basal cell carcinoma);ko05205(Proteoglycans in cancer);ko05200(Pathways in cancer);ko05165(Human papillomavirus infection);ko05022(Pathways of neurodegeneration - multiple diseases);ko05010(Alzheimer disease);ko04934(Cushing syndrome);ko04916(Melanogenesis);ko04550(Signaling pathways regulating pluripotency o…	WNT7B
ENSG00000132688	2748.65	41.8556794669333	39.9184757066735	41.573102608788	14.8476214400949	11.7604438734309	17.5105216196018	0.3526	-1.504	1.196e-23	5.184e-21	Down Regulation	1	156668763	156677407	-	5568	NES	GO:0000086;GO:0003674;GO:0005515;GO:0005737;GO:0005882;GO:0007399;GO:0007417;GO:0007420;GO:0019215;GO:0030844;GO:0031076;GO:0031730;GO:0032091;GO:0043086;GO:0043524;GO:0045111;GO:0048858;GO:0051402;GO:0072089;GO:2000179	K07609	-	S;Z	2RYFK;35IZ4;38H97;3BKTN;3CTCT;3JC7N;48A8D;4974P;4M7WJ;4N2PY	nestin [Source:HGNC Symbol;Acc:HGNC:7756]	10763	P48681;Q9H6U9	GO:0000086//G2/M transition of mitotic cell cycle;GO:0007399//nervous system development;GO:0007417//central nervous system development;GO:0007420//brain development;GO:0030844//positive regulation of intermediate filament depolymerization;GO:0031076//embryonic camera-type eye development;GO:0032091//negative regulation of protein binding;GO:0043086//negative regulation of catalytic activity;GO:0…	GO:0005737//cytoplasm;GO:0005882//intermediate filament;GO:0045111//intermediate filament cytoskeleton;	GO:0003674//molecular_function;GO:0005515//protein binding;GO:0019215//intermediate filament binding;GO:0031730//CCR5 chemokine receptor binding;	-	NES
ENSG00000143321	5171.08	116.464032956987	109.141209297696	109.298020657969	45.6872828700088	42.1684742384628	54.6867512520601	0.42	-1.251	1.25e-23	5.264e-21	Down Regulation	1	156742109	156766925	-	3674	HDGF	GO:0000122;GO:0000166;GO:0000978;GO:0001222;GO:0001227;GO:0003677;GO:0003690;GO:0003712;GO:0003714;GO:0003723;GO:0003779;GO:0005576;GO:0005615;GO:0005634;GO:0005654;GO:0005737;GO:0006354;GO:0006357;GO:0007165;GO:0008083;GO:0008201;GO:0015631;GO:0017053;GO:0034504;GO:0043524;GO:0045944;GO:0051781;GO:0062023;GO:0098761	K16641	-	J;K	KOG1904;35NN7;38GK1;3BMF9;3CRVW;3JC85;485N5;494YY;4MN2B;4MZH5	heparin binding growth factor [Source:HGNC Symbol;Acc:HGNC:4856]	3068	P51858;A0A384NPW1	GO:0000122//negative regulation of transcription by RNA polymerase II;GO:0006354//DNA-templated transcription, elongation;GO:0006357//regulation of transcription by RNA polymerase II;GO:0007165//signal transduction;GO:0034504//protein localization to nucleus;GO:0043524//negative regulation of neuron apoptotic process;GO:0045944//positive regulation of transcription by RNA polymerase II;GO:0051781…	GO:0005576//extracellular region;GO:0005615//extracellular space;GO:0005634//nucleus;GO:0005654//nucleoplasm;GO:0005737//cytoplasm;GO:0017053//transcription repressor complex;GO:0062023//collagen-containing extracellular matrix;	GO:0000166//nucleotide binding;GO:0000978//RNA polymerase II cis-regulatory region sequence-specific DNA binding;GO:0001222//transcription corepressor binding;GO:0001227//DNA-binding transcription repressor activity, RNA polymerase II-specific;GO:0003677//DNA binding;GO:0003690//double-stranded DNA binding;GO:0003712//transcription coregulator activity;GO:0003714//transcription corepressor activi…	-	HDGF
ENSG00000185561	858.164	2.29832621466881	2.89361465847053	2.44811595199438	14.6004758390591	17.9331735250842	9.35895302384447	5.466	2.4505	1.633e-23	6.686e-21	Up Regulation	17	1702816	1710377	-	5884	TLCD2	GO:0005886;GO:0007009;GO:0016020;GO:0016021;GO:0055088;GO:0055091;GO:0071709;GO:0097035	-	-	S	KOG4474;35ACU;39WXG;3BI2I;3CZTM;3J38V;47ZGX;499TA;4M9VW;4N4YK	TLC domain containing 2 [Source:HGNC Symbol;Acc:HGNC:33522]	727910	A6NGC4	GO:0007009//plasma membrane organization;GO:0055088//lipid homeostasis;GO:0055091//phospholipid homeostasis;GO:0071709//membrane assembly;GO:0097035//regulation of membrane lipid distribution;	GO:0005886//plasma membrane;GO:0016020//membrane;GO:0016021//integral component of membrane;	-	-	TLCD2
ENSG00000152527	3444.12	5.93530972213906	7.14826157565129	6.85193149018126	37.9662897159887	39.4138734242967	21.5674988091288	4.9407	2.3047	2.302e-23	9.172e-21	Up Regulation	2	43637260	43767987	+	9848	PLEKHH2	GO:0003779;GO:0005515;GO:0005654;GO:0005737;GO:0005829;GO:0005856;GO:0005886;GO:0016020;GO:0016604;GO:0030027;GO:0030835;GO:0030864;GO:0042995	K24020	-	S;Z	KOG0248;3594V;38E29;3BEHK;3CWNZ;3J2VN;4899F;492SU;4MA1P;4N1NC	pleckstrin homology, MyTH4 and FERM domain containing H2 [Source:HGNC Symbol;Acc:HGNC:30506]	130271	Q8IVE3	GO:0030835//negative regulation of actin filament depolymerization;	GO:0005654//nucleoplasm;GO:0005737//cytoplasm;GO:0005829//cytosol;GO:0005856//cytoskeleton;GO:0005886//plasma membrane;GO:0016020//membrane;GO:0016604//nuclear body;GO:0030027//lamellipodium;GO:0030864//cortical actin cytoskeleton;GO:0042995//cell projection;	GO:0003779//actin binding;GO:0005515//protein binding;	-	PLEKHH2
ENSG00000186951	691.729	1.15969014629183	1.77965576601494	1.3847662982636	4.40962362699419	4.59123445090372	4.52247376029312	3.107	1.6355	5.312e-23	2.061e-20	Up Regulation	22	46150521	46243755	+	13216	PPARA	GO:0000122;GO:0000785;GO:0000978;GO:0000981;GO:0001223;GO:0001227;GO:0001228;GO:0001666;GO:0003677;GO:0003700;GO:0003707;GO:0004879;GO:0005515;GO:0005634;GO:0005654;GO:0006094;GO:0006355;GO:0006357;GO:0006631;GO:0007154;GO:0007507;GO:0008270;GO:0008289;GO:0008544;GO:0009267;GO:0009755;GO:0010468;GO:0010565;GO:0010745;GO:0010876;GO:0010883;GO:0010887;GO:0010891;GO:0014070;GO:0019216;GO:0019217;GO:…	K07294	-	K	KOG3575;35BIF;38F47;3BI3H;3CVZ8;3J76M;484XR;48XHV;4ME7Y;4MYDN	peroxisome proliferator activated receptor alpha [Source:HGNC Symbol;Acc:HGNC:9232]	5465	Q07869;F1D8S4	GO:0000122//negative regulation of transcription by RNA polymerase II;GO:0001666//response to hypoxia;GO:0006094//gluconeogenesis;GO:0006355//regulation of transcription, DNA-templated;GO:0006357//regulation of transcription by RNA polymerase II;GO:0006631//fatty acid metabolic process;GO:0007154//cell communication;GO:0007507//heart development;GO:0008544//epidermis development;GO:0009267//cellu…	GO:0000785//chromatin;GO:0005634//nucleus;GO:0005654//nucleoplasm;	GO:0000978//RNA polymerase II cis-regulatory region sequence-specific DNA binding;GO:0000981//DNA-binding transcription factor activity, RNA polymerase II-specific;GO:0001223//transcription coactivator binding;GO:0001227//DNA-binding transcription repressor activity, RNA polymerase II-specific;GO:0001228//DNA-binding transcription activator activity, RNA polymerase II-specific;GO:0003677//DNA bin…	ko05415(Diabetic cardiomyopathy);ko05207(Chemical carcinogenesis - receptor activation);ko05160(Hepatitis C);ko04936(Alcoholic liver disease);ko04932(Non-alcoholic fatty liver disease);ko04931(Insulin resistance);ko04922(Glucagon signaling pathway);ko04920(Adipocytokine signaling pathway);ko04024(cAMP signaling pathway);ko03320(PPAR signaling pathway)	PPARA
ENSG00000081059	393.186	3.44893573314191	3.78474420431919	3.97158921358506	0.62497007727959	0.411369068757335	0.973865535482368	0.1764	-2.503	9.474e-23	3.581e-20	Down Regulation	5	134114681	134151865	+	10093	TCF7	GO:0000976;GO:0000978;GO:0000981;GO:0001217;GO:0003677;GO:0005515;GO:0005634;GO:0005654;GO:0006355;GO:0006357;GO:0006955;GO:0008013;GO:0016055;GO:0016604;GO:0033153;GO:0042492;GO:0045586;GO:0045892;GO:0060070;GO:0071353;GO:1990837;GO:1990907	K02620	-	K;B	KOG3248;35AKJ;38DSF;3BGB8;3CWEU;3J7JF;484VZ;4934C;4M6F0;4N1QF	transcription factor 7 [Source:HGNC Symbol;Acc:HGNC:11639]	6932	P36402;B3KQ75	GO:0006355//regulation of transcription, DNA-templated;GO:0006357//regulation of transcription by RNA polymerase II;GO:0006955//immune response;GO:0016055//Wnt signaling pathway;GO:0033153//T cell receptor V(D)J recombination;GO:0042492//gamma-delta T cell differentiation;GO:0045586//regulation of gamma-delta T cell differentiation;GO:0045892//negative regulation of transcription, DNA-templated;G…	GO:0005634//nucleus;GO:0005654//nucleoplasm;GO:0016604//nuclear body;GO:1990907//beta-catenin-TCF complex;	GO:0000976//transcription cis-regulatory region binding;GO:0000978//RNA polymerase II cis-regulatory region sequence-specific DNA binding;GO:0000981//DNA-binding transcription factor activity, RNA polymerase II-specific;GO:0001217//DNA-binding transcription repressor activity;GO:0003677//DNA binding;GO:0005515//protein binding;GO:0008013//beta-catenin binding;GO:1990837//sequence-specific double-…	ko05412(Arrhythmogenic right ventricular cardiomyopathy);ko05226(Gastric cancer);ko05225(Hepatocellular carcinoma);ko05224(Breast cancer);ko05221(Acute myeloid leukemia);ko05217(Basal cell carcinoma);ko05216(Thyroid cancer);ko05215(Prostate cancer);ko05213(Endometrial cancer);ko05210(Colorectal cancer);ko05200(Pathways in cancer);ko05167(Kaposi sarcoma-associated herpesvirus infection);ko05165(Hu…	TCF7
ENSG00000166897	99.3432	1.19077189737242	1.06769923781161	1.06104457302761	0.196845036294631	0.10120613641308	0.208341779169059	0.1504	-2.734	1.253e-22	4.613e-20	Down Regulation	22	37367960	37427479	-	8791	ELFN2	GO:0004864;GO:0005515;GO:0005615;GO:0016020;GO:0016021;GO:0031012;GO:0043086	K17568	-	S;T	2QVFI;359AV;38C9F;3BIVW;3CYDE;3JEMF;4895W;493V1;4MARN;4N567	extracellular leucine rich repeat and fibronectin type III domain containing 2 [Source:HGNC Symbol;Acc:HGNC:29396]	114794	Q5R3F8	GO:0043086//negative regulation of catalytic activity;	GO:0005615//extracellular space;GO:0016020//membrane;GO:0016021//integral component of membrane;GO:0031012//extracellular matrix;	GO:0004864//protein phosphatase inhibitor activity;GO:0005515//protein binding;	-	ELFN2
ENSG00000203668	829.422	10.3676065587884	7.92108673804955	8.53885040626716	3.02862544204869	3.14183334040835	3.08473602556506	0.3406	-1.554	1.283e-22	4.613e-20	Down Regulation	1	241628851	241640369	-	7778	CHML	GO:0004930;GO:0005092;GO:0005096;GO:0005634;GO:0005654;GO:0005737;GO:0005829;GO:0005968;GO:0006886;GO:0007165;GO:0007186;GO:0007264;GO:0016020;GO:0016021;GO:0016192;GO:0018344;GO:0031267;GO:0050790	K23460	-	O;T;U	KOG4405;35MV6;3985T;3BGRA;3CV49;3JE9U;4805M;48VXB;4MI9D;4N8J6	CHM like Rab escort protein [Source:HGNC Symbol;Acc:HGNC:1941]	1122	P26374	GO:0006886//intracellular protein transport;GO:0007165//signal transduction;GO:0007186//G protein-coupled receptor signaling pathway;GO:0007264//small GTPase mediated signal transduction;GO:0016192//vesicle-mediated transport;GO:0018344//protein geranylgeranylation;GO:0050790//regulation of catalytic activity;	GO:0005634//nucleus;GO:0005654//nucleoplasm;GO:0005737//cytoplasm;GO:0005829//cytosol;GO:0005968//Rab-protein geranylgeranyltransferase complex;GO:0016020//membrane;GO:0016021//integral component of membrane;	GO:0004930//G protein-coupled receptor activity;GO:0005092//GDP-dissociation inhibitor activity;GO:0005096//GTPase activator activity;GO:0031267//small GTPase binding;	-	CHML
ENSG00000058085	1049.61	13.3095405948647	12.0506726661784	13.4203787493657	3.79288973398012	4.88000641930588	5.06805174957882	0.3504	-1.513	3.399e-22	1.193e-19	Down Regulation	1	183186238	183245127	+	6770	LAMC2	GO:0005102;GO:0005201;GO:0005576;GO:0005604;GO:0005607;GO:0005615;GO:0005938;GO:0007155;GO:0008045;GO:0008201;GO:0008284;GO:0008544;GO:0009887;GO:0009888;GO:0016020;GO:0016358;GO:0030335;GO:0031012;GO:0048471;GO:0062023	K06246	-	O;W	KOG1836;35I28;39VN0;3BJYD;3CXV3;3JDEU;481N2;48ZUB;4MAWS;4N1J0	laminin subunit gamma 2 [Source:HGNC Symbol;Acc:HGNC:6493]	3918	Q13753	GO:0007155//cell adhesion;GO:0008045//motor neuron axon guidance;GO:0008284//positive regulation of cell population proliferation;GO:0008544//epidermis development;GO:0009887//animal organ morphogenesis;GO:0009888//tissue development;GO:0016358//dendrite development;GO:0030335//positive regulation of cell migration;	GO:0005576//extracellular region;GO:0005604//basement membrane;GO:0005607//laminin-2 complex;GO:0005615//extracellular space;GO:0005938//cell cortex;GO:0016020//membrane;GO:0031012//extracellular matrix;GO:0048471//perinuclear region of cytoplasm;GO:0062023//collagen-containing extracellular matrix;	GO:0005102//signaling receptor binding;GO:0005201//extracellular matrix structural constituent;GO:0008201//heparin binding;	ko05222(Small cell lung cancer);ko05200(Pathways in cancer);ko05165(Human papillomavirus infection);ko05146(Amoebiasis);ko05145(Toxoplasmosis);ko04512(ECM-receptor interaction);ko04510(Focal adhesion);ko04151(PI3K-Akt signaling pathway)	LAMC2
ENSG00000132382	1294.62	17.1578582817713	15.7538502846624	17.1023233779966	7.78577016204254	7.46645808331137	8.43320641096389	0.4679	-1.096	4.284e-22	1.469e-19	Down Regulation	17	4538897	4555386	-	5958	MYBBP1A	GO:0001649;GO:0003677;GO:0003714;GO:0003723;GO:0005634;GO:0005654;GO:0005730;GO:0005737;GO:0006338;GO:0006355;GO:0008134;GO:0016020;GO:0022904;GO:0032922;GO:0035066;GO:0042149;GO:0042254;GO:0042564;GO:0043231;GO:0043565;GO:0045892;GO:0045943;GO:0045944;GO:0045945;GO:0048511;GO:0070888;GO:0072332;GO:0110016;GO:1903450;GO:2000210	K02331	EC:2.7.7.7	S;K	KOG1926;35BWI;390BU;3BBZ4;3CWM7;3JATF;481CU;497MZ;4M716;4MX5F	MYB binding protein 1a [Source:HGNC Symbol;Acc:HGNC:7546]	10514	Q9BQG0	GO:0001649//osteoblast differentiation;GO:0006338//chromatin remodeling;GO:0006355//regulation of transcription, DNA-templated;GO:0022904//respiratory electron transport chain;GO:0032922//circadian regulation of gene expression;GO:0035066//positive regulation of histone acetylation;GO:0042149//cellular response to glucose starvation;GO:0042254//ribosome biogenesis;GO:0045892//negative regulation …	GO:0005634//nucleus;GO:0005654//nucleoplasm;GO:0005730//nucleolus;GO:0005737//cytoplasm;GO:0016020//membrane;GO:0042564//NLS-dependent protein nuclear import complex;GO:0043231//intracellular membrane-bounded organelle;GO:0110016//B-WICH complex;	GO:0003677//DNA binding;GO:0003714//transcription corepressor activity;GO:0003723//RNA binding;GO:0008134//transcription factor binding;GO:0043565//sequence-specific DNA binding;GO:0070888//E-box binding;	-	MYBBP1A
ENSG00000161243	3182.38	88.4143181694188	93.7284363717848	93.1029184305097	32.1523505087782	35.8007191524309	43.8736299193998	0.4017	-1.316	5.789e-22	1.94e-19	Down Regulation	19	38990714	39032785	-	2790	FBXO27	GO:0005515;GO:0005737;GO:0005829;GO:0006516;GO:0016567;GO:0019005;GO:0030433;GO:0031146;GO:0061630	K10102	-	S;O	2RZA6;35NCA;39JYU;3BB1G;3CWP2;3J2K4;47ZGG;492T5;4MCW4;4MXDW	F-box protein 27 [Source:HGNC Symbol;Acc:HGNC:18753]	126433	Q8NI29;A0A384MR61	GO:0006516//glycoprotein catabolic process;GO:0016567//protein ubiquitination;GO:0030433//ubiquitin-dependent ERAD pathway;GO:0031146//SCF-dependent proteasomal ubiquitin-dependent protein catabolic process;	GO:0005737//cytoplasm;GO:0005829//cytosol;GO:0019005//SCF ubiquitin ligase complex;	GO:0005515//protein binding;GO:0061630//ubiquitin protein ligase activity;	-	FBXO27
ENSG00000173546	193.4	1.9575418258786	2.38952104795317	2.09366706524317	0.606022896867386	0.336277023118191	0.53760304941411	0.2273	-2.137	6.907e-22	2.263e-19	Down Regulation	15	75674322	75712848	-	8290	CSPG4	GO:0001525;GO:0001726;GO:0005576;GO:0005654;GO:0005796;GO:0005886;GO:0005887;GO:0005925;GO:0006929;GO:0007165;GO:0008347;GO:0009986;GO:0015026;GO:0016020;GO:0016021;GO:0016324;GO:0019901;GO:0030154;GO:0031258;GO:0035556;GO:0042995;GO:0043202;GO:0043410;GO:0048008;GO:0048771;GO:0050731;GO:0062023;GO:0070062;GO:0097178	K08115	-	S;T;C	KOG3597;35IK9;38YSW;3BATE;3CU5B;3J6XW;480I2;495RM;4M7WS;4N4Y2	chondroitin sulfate proteoglycan 4 [Source:HGNC Symbol;Acc:HGNC:2466]	1464	Q6UVK1	GO:0001525//angiogenesis;GO:0006929//substrate-dependent cell migration;GO:0007165//signal transduction;GO:0008347//glial cell migration;GO:0030154//cell differentiation;GO:0035556//intracellular signal transduction;GO:0043410//positive regulation of MAPK cascade;GO:0048008//platelet-derived growth factor receptor signaling pathway;GO:0048771//tissue remodeling;GO:0050731//positive regulation of …	GO:0001726//ruffle;GO:0005576//extracellular region;GO:0005654//nucleoplasm;GO:0005796//Golgi lumen;GO:0005886//plasma membrane;GO:0005887//integral component of plasma membrane;GO:0005925//focal adhesion;GO:0009986//cell surface;GO:0016020//membrane;GO:0016021//integral component of membrane;GO:0016324//apical plasma membrane;GO:0031258//lamellipodium membrane;GO:0042995//cell projection;GO:0043…	GO:0015026//coreceptor activity;GO:0019901//protein kinase binding;	-	CSPG4
ENSG00000144821	65.8249	1.05750028771066	0.692677022688657	0.860643816218143	0.0420923280552187	0.074542595216571	0.061381008945589	0.06696	-3.901	7.11e-22	2.279e-19	Down Regulation	3	108380368	108529322	-	7957	MYH15	GO:0000146;GO:0000166;GO:0002074;GO:0003774;GO:0003779;GO:0005516;GO:0005524;GO:0005737;GO:0005829;GO:0016459;GO:0016460;GO:0030016;GO:0032982;GO:0043231;GO:0051015	K24220	-	Z	KOG0161;35MW8;3AICJ;3BZHI;3D156;3JDY0;48C4K;497V7;4MG2M;4N5YI	myosin heavy chain 15 [Source:HGNC Symbol;Acc:HGNC:31073]	22989	Q9Y2K3	GO:0002074//extraocular skeletal muscle development;	GO:0005737//cytoplasm;GO:0005829//cytosol;GO:0016459//myosin complex;GO:0016460//myosin II complex;GO:0030016//myofibril;GO:0032982//myosin filament;GO:0043231//intracellular membrane-bounded organelle;	GO:0000146//microfilament motor activity;GO:0000166//nucleotide binding;GO:0003774//cytoskeletal motor activity;GO:0003779//actin binding;GO:0005516//calmodulin binding;GO:0005524//ATP binding;GO:0051015//actin filament binding;	-	MYH15
ENSG00000125285	120.174	4.48791366360536	3.7139364996993	4.01782049354894	0.400906391988308	0.405701388603458	0.87693078418101	0.1349	-2.89	1.194e-21	3.745e-19	Down Regulation	13	94709622	94712545	-	2924	SOX21	GO:0000785;GO:0000978;GO:0000981;GO:0001228;GO:0001942;GO:0003677;GO:0003700;GO:0005575;GO:0005634;GO:0006355;GO:0006357;GO:0009653;GO:0030154;GO:0042633;GO:0043588;GO:0045944;GO:0048863	K09267	-	K;B	KOG0527;35F8N;3931A;3BJ6K;3CUUC;3JNAS;48QF4;49M16;4MD9B;4MVDY	SRY-box transcription factor 21 [Source:HGNC Symbol;Acc:HGNC:11197]	11166	Q9Y651	GO:0001942//hair follicle development;GO:0006355//regulation of transcription, DNA-templated;GO:0006357//regulation of transcription by RNA polymerase II;GO:0009653//anatomical structure morphogenesis;GO:0030154//cell differentiation;GO:0042633//hair cycle;GO:0043588//skin development;GO:0045944//positive regulation of transcription by RNA polymerase II;GO:0048863//stem cell differentiation;	GO:0000785//chromatin;GO:0005575//cellular_component;GO:0005634//nucleus;	GO:0000978//RNA polymerase II cis-regulatory region sequence-specific DNA binding;GO:0000981//DNA-binding transcription factor activity, RNA polymerase II-specific;GO:0001228//DNA-binding transcription activator activity, RNA polymerase II-specific;GO:0003677//DNA binding;GO:0003700//DNA-binding transcription factor activity;	-	SOX21
ENSG00000197457	401.787	14.8986215397421	10.1610501888248	11.5576687067233	3.20664607980386	1.99735271951476	3.02332878949355	0.2209	-2.179	2.128e-21	6.447e-19	Down Regulation	20	63639705	63657682	-	3029	STMN3	GO:0001835;GO:0005515;GO:0005737;GO:0005794;GO:0005829;GO:0007019;GO:0007399;GO:0015631;GO:0019904;GO:0030424;GO:0030426;GO:0031110;GO:0031122;GO:0031175;GO:0035021;GO:0042995;GO:0043005;GO:0043087;GO:0051493	K26158	-	S;Z	KOG1280;35J8B;38BEB;3BBGC;3CXHB;3J74W;48DC5;494AQ;4M6XN;4MYZC	stathmin 3 [Source:HGNC Symbol;Acc:HGNC:15926]	50861	Q9NZ72	GO:0001835//blastocyst hatching;GO:0007019//microtubule depolymerization;GO:0007399//nervous system development;GO:0031110//regulation of microtubule polymerization or depolymerization;GO:0031122//cytoplasmic microtubule organization;GO:0031175//neuron projection development;GO:0035021//negative regulation of Rac protein signal transduction;GO:0043087//regulation of GTPase activity;GO:0051493//re…	GO:0005737//cytoplasm;GO:0005794//Golgi apparatus;GO:0005829//cytosol;GO:0030424//axon;GO:0030426//growth cone;GO:0042995//cell projection;GO:0043005//neuron projection;	GO:0005515//protein binding;GO:0015631//tubulin binding;GO:0019904//protein domain specific binding;	-	STMN3
ENSG00000101255	1785.43	6.37685748600519	6.54979909945152	6.26054823796108	55.9571371747393	81.4457310481548	27.0657959607526	8.5609	3.0978	2.143e-21	6.447e-19	Up Regulation	20	362835	397559	+	3291	TRIB3	GO:0000122;GO:0003714;GO:0004672;GO:0004860;GO:0005515;GO:0005524;GO:0005634;GO:0005654;GO:0005829;GO:0005886;GO:0006468;GO:0006469;GO:0006915;GO:0010506;GO:0010827;GO:0019899;GO:0019901;GO:0031434;GO:0031625;GO:0032092;GO:0032436;GO:0032869;GO:0034976;GO:0043405;GO:0045599;GO:0045717;GO:0045892;GO:0051443;GO:0055106;GO:0070059	K19518	-	T;G	KOG0583;35BH3;39REI;3BMSD;3D3XC;3JFRV;485UY;48ZRD;4MB5Y;4N1MC	tribbles pseudokinase 3 [Source:HGNC Symbol;Acc:HGNC:16228]	57761	Q96RU7	GO:0000122//negative regulation of transcription by RNA polymerase II;GO:0006468//protein phosphorylation;GO:0006469//negative regulation of protein kinase activity;GO:0006915//apoptotic process;GO:0010506//regulation of autophagy;GO:0010827//regulation of glucose transmembrane transport;GO:0032092//positive regulation of protein binding;GO:0032436//positive regulation of proteasomal ubiquitin-de…	GO:0005634//nucleus;GO:0005654//nucleoplasm;GO:0005829//cytosol;GO:0005886//plasma membrane;	GO:0003714//transcription corepressor activity;GO:0004672//protein kinase activity;GO:0004860//protein kinase inhibitor activity;GO:0005515//protein binding;GO:0005524//ATP binding;GO:0019899//enzyme binding;GO:0019901//protein kinase binding;GO:0031434//mitogen-activated protein kinase kinase binding;GO:0031625//ubiquitin protein ligase binding;GO:0055106//ubiquitin-protein transferase regulator…	ko04931(Insulin resistance)	TRIB3
ENSG00000053372	1461.2	46.6376520664883	40.5436534538976	47.4872567948701	19.153131836993	18.6573116522362	21.3296634656097	0.4337	-1.205	3.707e-21	1.093e-18	Down Regulation	1	19251805	19260128	+	2556	MRTO4	GO:0000027;GO:0000956;GO:0003723;GO:0005515;GO:0005634;GO:0005730;GO:0005737;GO:0006364;GO:0030687;GO:0042254;GO:0042273	K14815	-	A;J	KOG0816;35CBR;394J2;3BHV3;3CTPH;3JA4Q;48068;491RR;4MEYA;4MYNU	MRT4 homolog, ribosome maturation factor [Source:HGNC Symbol;Acc:HGNC:18477]	51154	Q9UKD2;A0A024RAE1	GO:0000027//ribosomal large subunit assembly;GO:0000956//nuclear-transcribed mRNA catabolic process;GO:0006364//rRNA processing;GO:0042254//ribosome biogenesis;GO:0042273//ribosomal large subunit biogenesis;	GO:0005634//nucleus;GO:0005730//nucleolus;GO:0005737//cytoplasm;GO:0030687//preribosome, large subunit precursor;	GO:0003723//RNA binding;GO:0005515//protein binding;	-	MRTO4
ENSG00000026508	28213.2	234.291672833816	215.437013769326	225.177055552483	83.3634470908805	89.0534199653133	110.151018696332	0.4134	-1.274	3.891e-21	1.125e-18	Down Regulation	11	35138882	35232402	+	9992	CD44	GO:0004888;GO:0004896;GO:0005515;GO:0005518;GO:0005540;GO:0005794;GO:0005829;GO:0005886;GO:0005887;GO:0005902;GO:0005925;GO:0006954;GO:0007155;GO:0007160;GO:0009986;GO:0016020;GO:0016021;GO:0016323;GO:0016324;GO:0016477;GO:0019221;GO:0030214;GO:0030667;GO:0031258;GO:0033138;GO:0033674;GO:0034116;GO:0035692;GO:0042110;GO:0042995;GO:0043066;GO:0043154;GO:0043518;GO:0044319;GO:0044344;GO:0050731;GO:…	K06256	-	S;T	2RX7Q;35MNC;38KHJ;3BEXM;3CZDW;3J66Y;47ZMG;4993T;4ME35;4N62Q	CD44 molecule (Indian blood group) [Source:HGNC Symbol;Acc:HGNC:1681]	960	P16070	GO:0006954//inflammatory response;GO:0007155//cell adhesion;GO:0007160//cell-matrix adhesion;GO:0016477//cell migration;GO:0019221//cytokine-mediated signaling pathway;GO:0030214//hyaluronan catabolic process;GO:0033138//positive regulation of peptidyl-serine phosphorylation;GO:0033674//positive regulation of kinase activity;GO:0034116//positive regulation of heterotypic cell-cell adhesion;GO:004…	GO:0005794//Golgi apparatus;GO:0005829//cytosol;GO:0005886//plasma membrane;GO:0005887//integral component of plasma membrane;GO:0005902//microvillus;GO:0005925//focal adhesion;GO:0009986//cell surface;GO:0016020//membrane;GO:0016021//integral component of membrane;GO:0016323//basolateral plasma membrane;GO:0016324//apical plasma membrane;GO:0030667//secretory granule membrane;GO:0031258//lamelli…	GO:0004888//transmembrane signaling receptor activity;GO:0004896//cytokine receptor activity;GO:0005515//protein binding;GO:0005518//collagen binding;GO:0005540//hyaluronic acid binding;	ko05206(MicroRNAs in cancer);ko05205(Proteoglycans in cancer);ko05169(Epstein-Barr virus infection);ko05131(Shigellosis);ko04640(Hematopoietic cell lineage);ko04512(ECM-receptor interaction)	CD44
ENSG00000138134	501.371	7.17671312321439	5.83421299108354	6.59168341226518	2.33067543741207	2.27010555264048	2.65523464434434	0.3651	-1.454	5.556e-21	1.575e-18	Down Regulation	10	88879734	88975153	+	6323	STAMBPL1	GO:0005515;GO:0005768;GO:0005829;GO:0006508;GO:0008233;GO:0008237;GO:0016020;GO:0016579;GO:0016787;GO:0046872;GO:0061578;GO:0070536;GO:0140492	K11867	EC:3.4.19.12	O;T;I	KOG2880;35C6X;38CKJ;3BFSU;3CRQ0;3J9CR;47ZTW;48UUD;4M82G;4MTCM	STAM binding protein like 1 [Source:HGNC Symbol;Acc:HGNC:24105]	57559	Q96FJ0	GO:0006508//proteolysis;GO:0016579//protein deubiquitination;GO:0070536//protein K63-linked deubiquitination;	GO:0005768//endosome;GO:0005829//cytosol;GO:0016020//membrane;	GO:0005515//protein binding;GO:0008233//peptidase activity;GO:0008237//metallopeptidase activity;GO:0016787//hydrolase activity;GO:0046872//metal ion binding;GO:0061578//Lys63-specific deubiquitinase activity;GO:0140492//metal-dependent deubiquitinase activity;	-	STAMBPL1
ENSG00000135069	5605.51	49.7686215574829	60.0375600556455	51.2481381085107	247.679183184848	295.519107554377	158.826918714037	4.3424	2.1185	1.079e-20	3.001e-18	Up Regulation	9	78297125	78330093	+	2206	PSAT1	GO:0003824;GO:0004648;GO:0005515;GO:0005737;GO:0005829;GO:0006564;GO:0008483;GO:0008615;GO:0008652;GO:0016740;GO:0030170;GO:0042802;GO:0070062	K00831	EC:2.6.1.52	H;E	KOG2790;35KKS;38B9C;3BGD1;3CWFZ;3J1Y4;485VP;496QZ;4MCD2;4N2TI	phosphoserine aminotransferase 1 [Source:HGNC Symbol;Acc:HGNC:19129]	29968	Q9Y617;A0A024R222	GO:0006564//L-serine biosynthetic process;GO:0008615//pyridoxine biosynthetic process;GO:0008652//cellular amino acid biosynthetic process;	GO:0005737//cytoplasm;GO:0005829//cytosol;GO:0070062//extracellular exosome;	GO:0003824//catalytic activity;GO:0004648//O-phospho-L-serine:2-oxoglutarate aminotransferase activity;GO:0005515//protein binding;GO:0008483//transaminase activity;GO:0016740//transferase activity;GO:0030170//pyridoxal phosphate binding;GO:0042802//identical protein binding;	ko00750(Vitamin B6 metabolism);ko00270(Cysteine and methionine metabolism);ko00260(Glycine, serine and threonine metabolism)	PSAT1
ENSG00000181104	1103.39	24.4631884370183	21.693601394897	22.130961335316	10.2030128838319	7.78004932281045	7.86962639565038	0.374	-1.419	1.433e-20	3.912e-18	Down Regulation	5	76716126	76735770	+	3972	F2R	GO:0001965;GO:0002248;GO:0003105;GO:0004930;GO:0005102;GO:0005515;GO:0005576;GO:0005769;GO:0005770;GO:0005794;GO:0005886;GO:0005887;GO:0005901;GO:0006919;GO:0006954;GO:0007165;GO:0007186;GO:0007200;GO:0007204;GO:0007205;GO:0007529;GO:0007596;GO:0007599;GO:0008284;GO:0008285;GO:0009611;GO:0009653;GO:0009986;GO:0014068;GO:0015057;GO:0016020;GO:0016021;GO:0030168;GO:0030193;GO:0030194;GO:0030335;GO:…	K03914	-	S;T	2QTR0;35B83;39SJH;3BIZH;3D0WD;3JFG5;488WM;492XD;4MMBQ;4N27A	coagulation factor II thrombin receptor [Source:HGNC Symbol;Acc:HGNC:3537]	2149	P25116;A0A024RAP7	GO:0002248//connective tissue replacement involved in inflammatory response wound healing;GO:0003105//negative regulation of glomerular filtration;GO:0006919//activation of cysteine-type endopeptidase activity involved in apoptotic process;GO:0006954//inflammatory response;GO:0007165//signal transduction;GO:0007186//G protein-coupled receptor signaling pathway;GO:0007200//phospholipase C-activati…	GO:0005576//extracellular region;GO:0005769//early endosome;GO:0005770//late endosome;GO:0005794//Golgi apparatus;GO:0005886//plasma membrane;GO:0005887//integral component of plasma membrane;GO:0005901//caveola;GO:0009986//cell surface;GO:0016020//membrane;GO:0016021//integral component of membrane;GO:0031094//platelet dense tubular network;GO:0031594//neuromuscular junction;GO:0045202//synapse;…	GO:0001965//G-protein alpha-subunit binding;GO:0004930//G protein-coupled receptor activity;GO:0005102//signaling receptor binding;GO:0005515//protein binding;GO:0015057//thrombin-activated receptor activity;GO:0031681//G-protein beta-subunit binding;	ko05200(Pathways in cancer);ko05130(Pathogenic Escherichia coli infection);ko04810(Regulation of actin cytoskeleton);ko04611(Platelet activation);ko04610(Complement and coagulation cascades);ko04151(PI3K-Akt signaling pathway);ko04080(Neuroactive ligand-receptor interaction);ko04072(Phospholipase D signaling pathway);ko04024(cAMP signaling pathway);ko04020(Calcium signaling pathway);ko04015(Rap1 …	F2R
ENSG00000163516	671.842	2.97088452179213	3.77335657247482	3.55974812726129	9.36607520999028	9.66043941598272	8.15281584603355	2.6202	1.3897	1.688e-20	4.524e-18	Up Regulation	2	219229783	219236679	+	6103	ANKZF1	GO:0005515;GO:0005737;GO:0016020;GO:0030433;GO:0046872;GO:0070301	K26089	-	A	KOG2505;35ICP;39G6A;3BBNT;3CSI9;3J4EQ;489Q0;48X3I;4MIXX;4MUJV	ankyrin repeat and zinc finger peptidyl tRNA hydrolase 1 [Source:HGNC Symbol;Acc:HGNC:25527]	55139	Q9H8Y5	GO:0030433//ubiquitin-dependent ERAD pathway;GO:0070301//cellular response to hydrogen peroxide;	GO:0005737//cytoplasm;GO:0016020//membrane;	GO:0005515//protein binding;GO:0046872//metal ion binding;	-	ANKZF1
ENSG00000260916	805.667	1.76641762465955	2.06114229162884	1.88726230789987	8.92253999509295	10.6750881738193	5.82034244446649	4.4293	2.1471	2.434e-20	6.408e-18	Up Regulation	15	55340032	55408510	-	8790	CCPG1	GO:0003674;GO:0005515;GO:0007049;GO:0008284;GO:0016020;GO:0016021;GO:0045787;GO:0045944;GO:2001106	-	-	S	2QWDZ;35JS2;38E4Z;3BHAB;3D1IE;3JCPE;4841Y;48ZG6;4MG1M;4MTAW	cell cycle progression 1 [Source:HGNC Symbol;Acc:HGNC:24227]	9236	Q9ULG6;A0A024R5S7	GO:0007049//cell cycle;GO:0008284//positive regulation of cell population proliferation;GO:0045787//positive regulation of cell cycle;GO:0045944//positive regulation of transcription by RNA polymerase II;GO:2001106//regulation of Rho guanyl-nucleotide exchange factor activity;	GO:0016020//membrane;GO:0016021//integral component of membrane;	GO:0003674//molecular_function;GO:0005515//protein binding;	-	CCPG1
ENSG00000130204	979.033	21.5052782835975	20.1956586733687	21.161278159968	9.75715516554117	8.6259307707087	10.772726259373	0.4579	-1.127	5.989e-20	1.549e-17	Down Regulation	19	44890569	44903689	+	3610	TOMM40	GO:0005515;GO:0005739;GO:0005741;GO:0005742;GO:0005743;GO:0005829;GO:0006626;GO:0006811;GO:0008320;GO:0015031;GO:0015288;GO:0016020;GO:0016021;GO:0030150;GO:0031307;GO:0044233;GO:0045040;GO:0046930;GO:0055085	K11518	-	S;U	KOG3296;35J1C;38FFD;3B974;3CT7X;3JD80;47ZUM;48W8D;4MHZE;4MT0Q	translocase of outer mitochondrial membrane 40 [Source:HGNC Symbol;Acc:HGNC:18001]	10452	O96008	GO:0006626//protein targeting to mitochondrion;GO:0006811//ion transport;GO:0015031//protein transport;GO:0030150//protein import into mitochondrial matrix;GO:0045040//protein insertion into mitochondrial outer membrane;GO:0055085//transmembrane transport;	GO:0005739//mitochondrion;GO:0005741//mitochondrial outer membrane;GO:0005742//mitochondrial outer membrane translocase complex;GO:0005743//mitochondrial inner membrane;GO:0005829//cytosol;GO:0016020//membrane;GO:0016021//integral component of membrane;GO:0031307//integral component of mitochondrial outer membrane;GO:0044233//mitochondria-associated endoplasmic reticulum membrane;GO:0046930//pore…	GO:0005515//protein binding;GO:0008320//protein transmembrane transporter activity;GO:0015288//porin activity;	ko05022(Pathways of neurodegeneration - multiple diseases);ko05014(Amyotrophic lateral sclerosis)	TOMM40
ENSG00000166508	3302.31	67.4899993687218	61.7869636767394	65.4023108145873	17.9326065495723	16.0387282294567	26.6419923955945	0.3066	-1.706	6.458e-20	1.642e-17	Down Regulation	7	100092728	100101940	-	4386	MCM7	GO:0000166;GO:0000727;GO:0000781;GO:0000785;GO:0003677;GO:0003678;GO:0003697;GO:0004386;GO:0005515;GO:0005524;GO:0005634;GO:0005654;GO:0005694;GO:0005829;GO:0006259;GO:0006260;GO:0006268;GO:0006270;GO:0006271;GO:0006974;GO:0007049;GO:0008283;GO:0009410;GO:0016020;GO:0016787;GO:0016887;GO:0017116;GO:0030174;GO:0032508;GO:0042325;GO:0042555;GO:0071162;GO:0071310;GO:0071364;GO:0071466	K02210	EC:5.6.2.3	L	KOG0482;35KUZ;38CBW;3BDRW;3CUYV;3JB2A;484UH;4967C;4MGFZ;4MSIJ	minichromosome maintenance complex component 7 [Source:HGNC Symbol;Acc:HGNC:6950]	4176	P33993;C6EMX8;A0A0S2Z4A5	GO:0000727//double-strand break repair via break-induced replication;GO:0006259//DNA metabolic process;GO:0006260//DNA replication;GO:0006268//DNA unwinding involved in DNA replication;GO:0006270//DNA replication initiation;GO:0006271//DNA strand elongation involved in DNA replication;GO:0006974//cellular response to DNA damage stimulus;GO:0007049//cell cycle;GO:0008283//cell population prolifera…	GO:0000781//chromosome, telomeric region;GO:0000785//chromatin;GO:0005634//nucleus;GO:0005654//nucleoplasm;GO:0005694//chromosome;GO:0005829//cytosol;GO:0016020//membrane;GO:0042555//MCM complex;GO:0071162//CMG complex;	GO:0000166//nucleotide binding;GO:0003677//DNA binding;GO:0003678//DNA helicase activity;GO:0003697//single-stranded DNA binding;GO:0004386//helicase activity;GO:0005515//protein binding;GO:0005524//ATP binding;GO:0016787//hydrolase activity;GO:0016887//ATP hydrolysis activity;GO:0017116//single-stranded DNA helicase activity;	ko04110(Cell cycle);ko03030(DNA replication)	MCM7
ENSG00000171241	910.11	13.7241029530738	11.1615665864769	11.7115384418798	3.99564008680798	4.11112492468297	5.22023861050744	0.359	-1.478	9.618e-20	2.403e-17	Down Regulation	16	46578591	46621379	-	6175	SHCBP1	GO:0005515;GO:0005737;GO:0005819;GO:0005856;GO:0008543;GO:0030496;GO:0042169;GO:2000177	-	-	S;Z	2QUQ2;35AWB;38YK9;3BIBX;3CSZZ;3JBW2;4845B;4932D;4MIT6;4MWQZ	SHC binding and spindle associated 1 [Source:HGNC Symbol;Acc:HGNC:29547]	79801	Q8NEM2;A0A024R6R1	GO:0008543//fibroblast growth factor receptor signaling pathway;GO:2000177//regulation of neural precursor cell proliferation;	GO:0005737//cytoplasm;GO:0005819//spindle;GO:0005856//cytoskeleton;GO:0030496//midbody;	GO:0005515//protein binding;GO:0042169//SH2 domain binding;	-	SHCBP1
ENSG00000204394	2551.38	33.7828242877573	30.6542018971335	34.3270589802805	15.7021540326165	15.1511805453684	17.567761488109	0.4842	-1.046	1.057e-19	2.596e-17	Down Regulation	6	31777518	31795752	-	5880	VARS1	GO:0000166;GO:0002161;GO:0003824;GO:0004812;GO:0004832;GO:0005515;GO:0005524;GO:0005829;GO:0006399;GO:0006412;GO:0006418;GO:0006438;GO:0016874;GO:0106074	K01873	EC:6.1.1.9	O;J	KOG0432;KOG0867;35KFQ;38BX5;3BDDJ;3CUM1;3J22W;481XS;48Z1G;4MAVC;4MXTI	valyl-tRNA synthetase 1 [Source:HGNC Symbol;Acc:HGNC:12651]	7407	P26640;A0A024RCN6	GO:0006399//tRNA metabolic process;GO:0006412//translation;GO:0006418//tRNA aminoacylation for protein translation;GO:0006438//valyl-tRNA aminoacylation;GO:0106074//aminoacyl-tRNA metabolism involved in translational fidelity;	GO:0005829//cytosol;	GO:0000166//nucleotide binding;GO:0002161//aminoacyl-tRNA editing activity;GO:0003824//catalytic activity;GO:0004812//aminoacyl-tRNA ligase activity;GO:0004832//valine-tRNA ligase activity;GO:0005515//protein binding;GO:0005524//ATP binding;GO:0016874//ligase activity;	ko00970(Aminoacyl-tRNA biosynthesis)	VARS1
ENSG00000092621	1383.59	2.04445766468187	3.1660098266938	2.78888646533063	15.5731312554255	18.4842357296813	9.09752223411466	5.389	2.43	1.437e-19	3.472e-17	Up Regulation	1	119648411	119744218	+	9187	PHGDH	GO:0004617;GO:0005829;GO:0006541;GO:0006544;GO:0006563;GO:0006564;GO:0006566;GO:0007420;GO:0008652;GO:0009055;GO:0009448;GO:0010468;GO:0016491;GO:0016616;GO:0019530;GO:0021510;GO:0021782;GO:0021915;GO:0022008;GO:0022900;GO:0030060;GO:0031175;GO:0051287;GO:0070062;GO:0070314	K00058	-	H;E	KOG0068;35GH2;38GJA;3BEWZ;3CTJ7;3J3US;484RB;494HT;4MBF9;4N5W9	phosphoglycerate dehydrogenase [Source:HGNC Symbol;Acc:HGNC:8923]	26227	O43175	GO:0006541//glutamine metabolic process;GO:0006544//glycine metabolic process;GO:0006563//L-serine metabolic process;GO:0006564//L-serine biosynthetic process;GO:0006566//threonine metabolic process;GO:0007420//brain development;GO:0008652//cellular amino acid biosynthetic process;GO:0009448//gamma-aminobutyric acid metabolic process;GO:0010468//regulation of gene expression;GO:0019530//taurine m…	GO:0005829//cytosol;GO:0070062//extracellular exosome;	GO:0004617//phosphoglycerate dehydrogenase activity;GO:0009055//electron transfer activity;GO:0016491//oxidoreductase activity;GO:0016616//oxidoreductase activity, acting on the CH-OH group of donors, NAD or NADP as acceptor;GO:0030060//L-malate dehydrogenase activity;GO:0051287//NAD binding;	ko00270(Cysteine and methionine metabolism);ko00260(Glycine, serine and threonine metabolism)	PHGDH
ENSG00000127564	236.02	4.98448150107976	3.75214048852151	4.28465878998177	0.897811699062793	0.787031330702148	1.35014464464731	0.229	-2.127	1.518e-19	3.556e-17	Down Regulation	16	2968024	2980479	-	4974	PKMYT1	GO:0000079;GO:0000086;GO:0000139;GO:0000166;GO:0000278;GO:0004672;GO:0004674;GO:0005515;GO:0005524;GO:0005634;GO:0005654;GO:0005730;GO:0005737;GO:0005783;GO:0005789;GO:0005794;GO:0005829;GO:0006468;GO:0007049;GO:0007088;GO:0016020;GO:0016301;GO:0016310;GO:0016740;GO:0046872;GO:0051321;GO:0106310	K06633	EC:2.7.11.1	T;D	KOG0601;35D7B;38E4K;3BDJN;3CYBE;3J39V;47Z4X;48W26;4M8JA;4N3DI	protein kinase, membrane associated tyrosine/threonine 1 [Source:HGNC Symbol;Acc:HGNC:29650]	9088	Q99640;Q0IJ49	GO:0000079//regulation of cyclin-dependent protein serine/threonine kinase activity;GO:0000086//G2/M transition of mitotic cell cycle;GO:0000278//mitotic cell cycle;GO:0006468//protein phosphorylation;GO:0007049//cell cycle;GO:0007088//regulation of mitotic nuclear division;GO:0016310//phosphorylation;GO:0051321//meiotic cell cycle;	GO:0000139//Golgi membrane;GO:0005634//nucleus;GO:0005654//nucleoplasm;GO:0005730//nucleolus;GO:0005737//cytoplasm;GO:0005783//endoplasmic reticulum;GO:0005789//endoplasmic reticulum membrane;GO:0005794//Golgi apparatus;GO:0005829//cytosol;GO:0016020//membrane;	GO:0000166//nucleotide binding;GO:0004672//protein kinase activity;GO:0004674//protein serine/threonine kinase activity;GO:0005515//protein binding;GO:0005524//ATP binding;GO:0016301//kinase activity;GO:0016740//transferase activity;GO:0046872//metal ion binding;GO:0106310//protein serine kinase activity;	ko04914(Progesterone-mediated oocyte maturation);ko04114(Oocyte meiosis);ko04110(Cell cycle)	PKMYT1
ENSG00000154920	149.528	4.36394102107192	3.74406698562224	4.03249413843023	0.999837614136163	0.918333543929903	1.31591594037582	0.2623	-1.931	1.52e-19	3.556e-17	Down Regulation	17	50373220	50381483	+	3294	EME1	GO:0000712;GO:0000785;GO:0000792;GO:0003677;GO:0004518;GO:0004519;GO:0005515;GO:0005634;GO:0005654;GO:0005730;GO:0006281;GO:0006302;GO:0006310;GO:0006974;GO:0016787;GO:0031297;GO:0031573;GO:0043596;GO:0046872;GO:0048476;GO:0072429;GO:0090305;GO:1905347	K10882	EC:3.1.22.-	S;L	2R8ER;35KZE;38FRF;3BEJ0;3D167;3J7DH;483CI;496ES;4MCSG;4MTNW	essential meiotic structure-specific endonuclease 1 [Source:HGNC Symbol;Acc:HGNC:24965]	146956	Q96AY2	GO:0000712//resolution of meiotic recombination intermediates;GO:0006281//DNA repair;GO:0006302//double-strand break repair;GO:0006310//DNA recombination;GO:0006974//cellular response to DNA damage stimulus;GO:0031297//replication fork processing;GO:0031573//mitotic intra-S DNA damage checkpoint signaling;GO:0072429//response to intra-S DNA damage checkpoint signaling;GO:0090305//nucleic acid pho…	GO:0000785//chromatin;GO:0000792//heterochromatin;GO:0005634//nucleus;GO:0005654//nucleoplasm;GO:0005730//nucleolus;GO:0043596//nuclear replication fork;GO:0048476//Holliday junction resolvase complex;GO:1905347//endodeoxyribonuclease complex;	GO:0003677//DNA binding;GO:0004518//nuclease activity;GO:0004519//endonuclease activity;GO:0005515//protein binding;GO:0016787//hydrolase activity;GO:0046872//metal ion binding;	ko03460(Fanconi anemia pathway);ko03440(Homologous recombination)	EME1
ENSG00000129003	3296.89	6.69073914459294	6.47823398841067	6.63376497026715	12.9078054877596	12.2793453765109	11.9604726207621	1.856	0.8922	2.051e-19	4.724e-17	Nodiff	15	61852389	62060473	-	19703	VPS13C	GO:0005737;GO:0005739;GO:0005741;GO:0005764;GO:0005765;GO:0005768;GO:0005770;GO:0005783;GO:0005789;GO:0005811;GO:0005829;GO:0006623;GO:0006869;GO:0006895;GO:0007005;GO:0016020;GO:0019898;GO:0031902;GO:0032127;GO:0032868;GO:0045053;GO:0070062;GO:1905090	K19525	-	-	-	vacuolar protein sorting 13 homolog C [Source:HGNC Symbol;Acc:HGNC:23594]	54832	Q709C8	GO:0006623//protein targeting to vacuole;GO:0006869//lipid transport;GO:0006895//Golgi to endosome transport;GO:0007005//mitochondrion organization;GO:0032868//response to insulin;GO:0045053//protein retention in Golgi apparatus;GO:1905090//negative regulation of parkin-mediated stimulation of mitophagy in response to mitochondrial depolarization;	GO:0005737//cytoplasm;GO:0005739//mitochondrion;GO:0005741//mitochondrial outer membrane;GO:0005764//lysosome;GO:0005765//lysosomal membrane;GO:0005768//endosome;GO:0005770//late endosome;GO:0005783//endoplasmic reticulum;GO:0005789//endoplasmic reticulum membrane;GO:0005811//lipid droplet;GO:0005829//cytosol;GO:0016020//membrane;GO:0019898//extrinsic component of membrane;GO:0031902//late endoso…	-	-	VPS13C
ENSG00000103044	221.302	6.0296424543388	2.50814894443744	4.18926510285813	0.429395710686378	0.604541880717837	0.551807892895732	0.1225	-3.029	2.649e-19	6.008e-17	Down Regulation	16	69105653	69118719	+	5200	HAS3	GO:0000139;GO:0005515;GO:0005634;GO:0005737;GO:0005768;GO:0005769;GO:0005794;GO:0005886;GO:0005887;GO:0005975;GO:0016020;GO:0016021;GO:0016740;GO:0016757;GO:0030213;GO:0036117;GO:0042802;GO:0045226;GO:0045893;GO:0050501;GO:0085029;GO:1900106	K00752	EC:2.4.1.212	M	KOG2571;35BJ2;38FM0;3BDH3;3CUCU;3JES5;487HJ;48VBE;4MKR7;4N25G	hyaluronan synthase 3 [Source:HGNC Symbol;Acc:HGNC:4820]	3038	O00219	GO:0005975//carbohydrate metabolic process;GO:0030213//hyaluronan biosynthetic process;GO:0045226//extracellular polysaccharide biosynthetic process;GO:0045893//positive regulation of transcription, DNA-templated;GO:0085029//extracellular matrix assembly;GO:1900106//positive regulation of hyaluranon cable assembly;	GO:0000139//Golgi membrane;GO:0005634//nucleus;GO:0005737//cytoplasm;GO:0005768//endosome;GO:0005769//early endosome;GO:0005794//Golgi apparatus;GO:0005886//plasma membrane;GO:0005887//integral component of plasma membrane;GO:0016020//membrane;GO:0016021//integral component of membrane;GO:0036117//hyaluranon cable;	GO:0005515//protein binding;GO:0016740//transferase activity;GO:0016757//glycosyltransferase activity;GO:0042802//identical protein binding;GO:0050501//hyaluronan synthase activity;	-	HAS3
ENSG00000179041	499.035	23.8202013000367	21.733060572361	22.412977537129	9.89856972599704	9.65569304876229	10.8614141412134	0.442	-1.178	4.136e-19	9.24e-17	Down Regulation	8	66429014	66430733	+	1720	RRS1	GO:0000027;GO:0000055;GO:0000447;GO:0000794;GO:0002244;GO:0003723;GO:0005515;GO:0005634;GO:0005654;GO:0005730;GO:0005783;GO:0007080;GO:0008097;GO:0030687;GO:0042254;GO:0042273;GO:1901796;GO:1902570	K14852	-	J	KOG1765;35G8B;39R4U;3BDD5;3CVXR;3J896;4840R;48YKY;4M8CD;4N48P	ribosome biogenesis regulator 1 homolog [Source:HGNC Symbol;Acc:HGNC:17083]	23212	Q15050	GO:0000027//ribosomal large subunit assembly;GO:0000055//ribosomal large subunit export from nucleus;GO:0000447//endonucleolytic cleavage in ITS1 to separate SSU-rRNA from 5.8S rRNA and LSU-rRNA from tricistronic rRNA transcript (SSU-rRNA, 5.8S rRNA, LSU-rRNA);GO:0002244//hematopoietic progenitor cell differentiation;GO:0007080//mitotic metaphase plate congression;GO:0042254//ribosome biogenesis;…	GO:0000794//condensed nuclear chromosome;GO:0005634//nucleus;GO:0005654//nucleoplasm;GO:0005730//nucleolus;GO:0005783//endoplasmic reticulum;GO:0030687//preribosome, large subunit precursor;	GO:0003723//RNA binding;GO:0005515//protein binding;GO:0008097//5S rRNA binding;	-	RRS1
ENSG00000100889	764.882	2.31426668909325	3.17468444569549	2.82670405490154	22.7188058562819	21.5982520766169	9.60272049719578	6.466	2.6929	5.204e-19	1.134e-16	Up Regulation	14	24094053	24110598	+	4177	PCK2	GO:0000166;GO:0004611;GO:0004613;GO:0005515;GO:0005525;GO:0005739;GO:0005759;GO:0005829;GO:0006090;GO:0006094;GO:0006107;GO:0006116;GO:0016301;GO:0016310;GO:0016829;GO:0016831;GO:0017076;GO:0019543;GO:0030145;GO:0032024;GO:0032496;GO:0032869;GO:0033993;GO:0042594;GO:0046327;GO:0046872;GO:0070365;GO:0071333;GO:0071356;GO:0071548;GO:0071549	K01596	EC:4.1.1.32	C	KOG3749;35FTZ;38G8I;3B9P0;3CV3P;3JAI4;4835Z;48WG7;4M7HT;4N5FA	phosphoenolpyruvate carboxykinase 2, mitochondrial [Source:HGNC Symbol;Acc:HGNC:8725]	5106	Q16822;A0A384MTT2	GO:0006090//pyruvate metabolic process;GO:0006094//gluconeogenesis;GO:0006107//oxaloacetate metabolic process;GO:0006116//NADH oxidation;GO:0016310//phosphorylation;GO:0019543//propionate catabolic process;GO:0032024//positive regulation of insulin secretion;GO:0032496//response to lipopolysaccharide;GO:0032869//cellular response to insulin stimulus;GO:0033993//response to lipid;GO:0042594//respo…	GO:0005739//mitochondrion;GO:0005759//mitochondrial matrix;GO:0005829//cytosol;	GO:0000166//nucleotide binding;GO:0004611//phosphoenolpyruvate carboxykinase activity;GO:0004613//phosphoenolpyruvate carboxykinase (GTP) activity;GO:0005515//protein binding;GO:0005525//GTP binding;GO:0016301//kinase activity;GO:0016829//lyase activity;GO:0016831//carboxy-lyase activity;GO:0017076//purine nucleotide binding;GO:0030145//manganese ion binding;GO:0046872//metal ion binding;	ko04964(Proximal tubule bicarbonate reclamation);ko04931(Insulin resistance);ko04922(Glucagon signaling pathway);ko04920(Adipocytokine signaling pathway);ko04910(Insulin signaling pathway);ko04152(AMPK signaling pathway);ko04151(PI3K-Akt signaling pathway);ko04068(FoxO signaling pathway);ko03320(PPAR signaling pathway);ko00620(Pyruvate metabolism);ko00020(Citrate cycle (TCA cycle));ko00010(Glycol…	PCK2
ENSG00000128050	4406.84	48.9802658704729	43.2150397644948	46.0990695265121	20.0306586114624	17.3142513800337	23.2312541277765	0.4319	-1.211	5.232e-19	1.134e-16	Down Regulation	4	56435741	56464578	+	7516	PAICS	GO:0000166;GO:0003824;GO:0004638;GO:0004639;GO:0005515;GO:0005524;GO:0005737;GO:0005829;GO:0006164;GO:0006177;GO:0006189;GO:0008152;GO:0009113;GO:0016020;GO:0016829;GO:0016831;GO:0016874;GO:0042802;GO:0043727;GO:0044208;GO:0045296;GO:0070062;GO:0097294	K01587	-	F	KOG2835;35KCT;38BXP;3BDBW;3CVID;3J6AI;482J4;48X3K;4M828;4MY3U	phosphoribosylaminoimidazole carboxylase and phosphoribosylaminoimidazolesuccinocarboxamide synthase [Source:HGNC Symbol;Acc:HGNC:8587]	10606	P22234	GO:0006164//purine nucleotide biosynthetic process;GO:0006177//GMP biosynthetic process;GO:0006189//'de novo' IMP biosynthetic process;GO:0008152//metabolic process;GO:0009113//purine nucleobase biosynthetic process;GO:0044208//'de novo' AMP biosynthetic process;GO:0097294//'de novo' XMP biosynthetic process;	GO:0005737//cytoplasm;GO:0005829//cytosol;GO:0016020//membrane;GO:0070062//extracellular exosome;	GO:0000166//nucleotide binding;GO:0003824//catalytic activity;GO:0004638//phosphoribosylaminoimidazole carboxylase activity;GO:0004639//phosphoribosylaminoimidazolesuccinocarboxamide synthase activity;GO:0005515//protein binding;GO:0005524//ATP binding;GO:0016829//lyase activity;GO:0016831//carboxy-lyase activity;GO:0016874//ligase activity;GO:0042802//identical protein binding;GO:0043727//5-amin…	ko00230(Purine metabolism)	PAICS
ENSG00000174371	559.211	13.2087	10.6977907590563	12.1724593186332	2.90104184522221	2.4373464617719	4.36817052517813	0.2644	-1.919	9.035e-19	1.931e-16	Down Regulation	1	241847967	241895148	+	4137	EXO1	GO:0002376;GO:0002455;GO:0003677;GO:0003682;GO:0003824;GO:0004518;GO:0004519;GO:0004523;GO:0004527;GO:0005515;GO:0005634;GO:0005654;GO:0005886;GO:0006259;GO:0006281;GO:0006298;GO:0006310;GO:0006974;GO:0008409;GO:0016446;GO:0016604;GO:0016787;GO:0016788;GO:0017108;GO:0035312;GO:0044238;GO:0045145;GO:0045190;GO:0046872;GO:0048256;GO:0051321;GO:0051908;GO:0071704;GO:0090305;GO:0090502;GO:0090656	K10746	EC:3.1.-.-	L	KOG2518;35HX8;38FBD;3BEAT;3CUFW;3JBEF;486V5;493JT;4MC3K;4N5BJ	exonuclease 1 [Source:HGNC Symbol;Acc:HGNC:3511]	9156	Q9UQ84	GO:0002376//immune system process;GO:0002455//humoral immune response mediated by circulating immunoglobulin;GO:0006259//DNA metabolic process;GO:0006281//DNA repair;GO:0006298//mismatch repair;GO:0006310//DNA recombination;GO:0006974//cellular response to DNA damage stimulus;GO:0016446//somatic hypermutation of immunoglobulin genes;GO:0044238//primary metabolic process;GO:0045190//isotype switch…	GO:0005634//nucleus;GO:0005654//nucleoplasm;GO:0005886//plasma membrane;GO:0016604//nuclear body;	GO:0003677//DNA binding;GO:0003682//chromatin binding;GO:0003824//catalytic activity;GO:0004518//nuclease activity;GO:0004519//endonuclease activity;GO:0004523//RNA-DNA hybrid ribonuclease activity;GO:0004527//exonuclease activity;GO:0005515//protein binding;GO:0008409//5'-3' exonuclease activity;GO:0016787//hydrolase activity;GO:0016788//hydrolase activity, acting on ester bonds;GO:0017108//5'-f…	ko03430(Mismatch repair)	EXO1
ENSG00000171951	164.886	5.1894	6.39515816994648	5.93335272577968	1.23470012269541	1.81830419017936	1.11346567445006	0.2366	-2.08	1.022e-18	2.152e-16	Down Regulation	2	223596940	223602361	-	2577	SCG2	GO:0000165;GO:0001525;GO:0001937;GO:0001938;GO:0005125;GO:0005515;GO:0005576;GO:0005615;GO:0005788;GO:0006954;GO:0009306;GO:0030141;GO:0031045;GO:0035556;GO:0042056;GO:0043542;GO:0048245;GO:0050918;GO:0050930;GO:0098992;GO:2000352;GO:2001237	K25732	-	S;T	2QV5W;35F70;39PVC;3BH95;3CYCB;3J5E9;488JQ;4932W;4MARW;4MYFY	secretogranin II [Source:HGNC Symbol;Acc:HGNC:10575]	7857	P13521	GO:0000165//MAPK cascade;GO:0001525//angiogenesis;GO:0001937//negative regulation of endothelial cell proliferation;GO:0001938//positive regulation of endothelial cell proliferation;GO:0006954//inflammatory response;GO:0009306//protein secretion;GO:0035556//intracellular signal transduction;GO:0043542//endothelial cell migration;GO:0048245//eosinophil chemotaxis;GO:0050918//positive chemotaxis;GO…	GO:0005576//extracellular region;GO:0005615//extracellular space;GO:0005788//endoplasmic reticulum lumen;GO:0030141//secretory granule;GO:0031045//dense core granule;GO:0098992//neuronal dense core vesicle;	GO:0005125//cytokine activity;GO:0005515//protein binding;GO:0042056//chemoattractant activity;	-	SCG2
ENSG00000108799	633.231	3.1967047983907	3.55318046869288	3.34546977932183	6.83788704710649	7.05345653183872	6.86693669343018	2.0371	1.0265	1.297e-18	2.692e-16	Up Regulation	17	42700275	42745049	-	6988	EZH1	GO:0000122;GO:0000781;GO:0000792;GO:0003682;GO:0003714;GO:0005515;GO:0005634;GO:0005654;GO:0006325;GO:0006338;GO:0008168;GO:0009653;GO:0016740;GO:0018024;GO:0021766;GO:0031507;GO:0031509;GO:0032259;GO:0035098;GO:0042393;GO:0045944;GO:0046976;GO:0070734;GO:0098532	K17451	EC:2.1.1.356	K;G	KOG1079;35DZH;38DMC;3BB21;3CR6U;3J7MJ;480I1;48ZUW;4M9QE;4N1P8	enhancer of zeste 1 polycomb repressive complex 2 subunit [Source:HGNC Symbol;Acc:HGNC:3526]	2145	Q92800	GO:0000122//negative regulation of transcription by RNA polymerase II;GO:0006325//chromatin organization;GO:0006338//chromatin remodeling;GO:0009653//anatomical structure morphogenesis;GO:0021766//hippocampus development;GO:0031507//heterochromatin assembly;GO:0031509//subtelomeric heterochromatin assembly;GO:0032259//methylation;GO:0045944//positive regulation of transcription by RNA polymerase …	GO:0000781//chromosome, telomeric region;GO:0000792//heterochromatin;GO:0005634//nucleus;GO:0005654//nucleoplasm;GO:0035098//ESC/E(Z) complex;	GO:0003682//chromatin binding;GO:0003714//transcription corepressor activity;GO:0005515//protein binding;GO:0008168//methyltransferase activity;GO:0016740//transferase activity;GO:0018024//histone-lysine N-methyltransferase activity;GO:0042393//histone binding;GO:0046976//histone methyltransferase activity (H3-K27 specific);	ko00310(Lysine degradation)	EZH1
ENSG00000167670	457.291	9.8528895750858	8.42652887319243	9.15694965770252	2.56784	2.19375101299401	3.62693691811932	0.3008	-1.733	1.318e-18	2.699e-16	Down Regulation	19	4402640	4445018	+	4326	CHAF1A	GO:0000785;GO:0003682;GO:0005515;GO:0005634;GO:0006260;GO:0006281;GO:0006334;GO:0006335;GO:0006974;GO:0007049;GO:0032991;GO:0033186;GO:0042802;GO:0051082;GO:0070087	K10750	-	S;B	KOG4364;35KZM;38HXQ;3BEZ3;3CVU3;3JFR7;4856B;4922U;4MHZW;4N08S	chromatin assembly factor 1 subunit A [Source:HGNC Symbol;Acc:HGNC:1910]	10036	Q13111	GO:0006260//DNA replication;GO:0006281//DNA repair;GO:0006334//nucleosome assembly;GO:0006335//DNA replication-dependent chromatin assembly;GO:0006974//cellular response to DNA damage stimulus;GO:0007049//cell cycle;	GO:0000785//chromatin;GO:0005634//nucleus;GO:0032991//protein-containing complex;GO:0033186//CAF-1 complex;	GO:0003682//chromatin binding;GO:0005515//protein binding;GO:0042802//identical protein binding;GO:0051082//unfolded protein binding;GO:0070087//chromo shadow domain binding;	-	CHAF1A
ENSG00000183684	904.154	44.3912451283244	43.091128118168	42.0298483185844	20.417318473382	20.4206449415887	23.4485535702362	0.4904	-1.028	1.379e-18	2.785e-16	Down Regulation	17	81887835	81891586	-	1583	ALYREF	GO:0003676;GO:0003723;GO:0008380;GO:0016607	K12881	-	A;S	KOG0533;35DEC;38CX0;3BCRA;3CT6I;3JFKX;481A3;48XNT;4MBAZ;4N23I	Aly/REF export factor [Source:HGNC Symbol;Acc:HGNC:19071]	10189	Q86V81;E9PB61	GO:0008380//RNA splicing;	GO:0016607//nuclear speck;	GO:0003676//nucleic acid binding;GO:0003723//RNA binding;	ko05168(Herpes simplex virus 1 infection);ko05014(Amyotrophic lateral sclerosis);ko03040(Spliceosome);ko03015(mRNA surveillance pathway);ko03013(Nucleocytoplasmic transport)	ALYREF
ENSG00000065534	304.799	0.755974497776859	0.84788014960001	0.83676203321237	0.313295345241893	0.21252593336596	0.315544503968943	0.3406	-1.554	1.728e-18	3.442e-16	Down Regulation	3	123610049	123884332	-	31537	MYLK	GO:0000166;GO:0001725;GO:0003779;GO:0004672;GO:0004674;GO:0004687;GO:0005515;GO:0005516;GO:0005524;GO:0005737;GO:0005829;GO:0005856;GO:0005886;GO:0006468;GO:0006939;GO:0014820;GO:0015629;GO:0016301;GO:0016310;GO:0016740;GO:0030027;GO:0030335;GO:0032060;GO:0032154;GO:0042995;GO:0046872;GO:0051928;GO:0060414;GO:0071476;GO:0090303	K00907	EC:2.7.11.18	S;Z;T	KOG0613;35ADG;38BAS;3B9IR;3CRJW;3J1NA;488H9;4900H;4MGK6;4MSQ1	myosin light chain kinase [Source:HGNC Symbol;Acc:HGNC:7590]	4638	Q15746	GO:0006468//protein phosphorylation;GO:0006939//smooth muscle contraction;GO:0014820//tonic smooth muscle contraction;GO:0016310//phosphorylation;GO:0030335//positive regulation of cell migration;GO:0032060//bleb assembly;GO:0051928//positive regulation of calcium ion transport;GO:0060414//aorta smooth muscle tissue morphogenesis;GO:0071476//cellular hypotonic response;GO:0090303//positive regula…	GO:0001725//stress fiber;GO:0005737//cytoplasm;GO:0005829//cytosol;GO:0005856//cytoskeleton;GO:0005886//plasma membrane;GO:0015629//actin cytoskeleton;GO:0030027//lamellipodium;GO:0032154//cleavage furrow;GO:0042995//cell projection;	GO:0000166//nucleotide binding;GO:0003779//actin binding;GO:0004672//protein kinase activity;GO:0004674//protein serine/threonine kinase activity;GO:0004687//myosin light chain kinase activity;GO:0005515//protein binding;GO:0005516//calmodulin binding;GO:0005524//ATP binding;GO:0016301//kinase activity;GO:0016740//transferase activity;GO:0046872//metal ion binding;	ko04971(Gastric acid secretion);ko04921(Oxytocin signaling pathway);ko04810(Regulation of actin cytoskeleton);ko04611(Platelet activation);ko04510(Focal adhesion);ko04371(Apelin signaling pathway);ko04270(Vascular smooth muscle contraction);ko04022(cGMP-PKG signaling pathway);ko04020(Calcium signaling pathway)	MYLK
ENSG00000205208	653.299	14.7085936563827	14.1462641803212	14.7995867520173	5.76667793277161	4.73854751350121	6.91239569015156	0.3935	-1.346	1.906e-18	3.747e-16	Down Regulation	4	158666675	158672255	-	3630	C4orf46	GO:0005515;GO:0005737	-	-	S	2SUFC;35Q93;3A2MU;3BQQG;3D82E;3JH30;48EUF;49BPC;4MK1U;4N6ZD	chromosome 4 open reading frame 46 [Source:HGNC Symbol;Acc:HGNC:27320]	201725	Q504U0	-	GO:0005737//cytoplasm;	GO:0005515//protein binding;	-	C4orf46
ENSG00000138413	4461.49	20.1454479952711	29.8111815564147	25.6294651927436	82.5264014211482	97.7367021826029	67.1185167891612	3.2608	1.7052	2.078e-18	4.031e-16	Up Regulation	2	208236229	208266074	-	4699	IDH1	GO:0000287;GO:0004450;GO:0005515;GO:0005576;GO:0005737;GO:0005739;GO:0005777;GO:0005782;GO:0005829;GO:0006097;GO:0006099;GO:0006102;GO:0006103;GO:0006739;GO:0006749;GO:0006979;GO:0008585;GO:0014070;GO:0016491;GO:0016616;GO:0034774;GO:0042802;GO:0042803;GO:0045296;GO:0046872;GO:0048545;GO:0050661;GO:0051287;GO:0060696;GO:0070062;GO:0071071;GO:1904724;GO:1904813	K00031	EC:1.1.1.42	C	KOG1526;35FB0;38CG3;3BATQ;3CVJV;3JEKN;488I0;48VFI;4M9FY;4MX3M	isocitrate dehydrogenase (NADP(+)) 1 [Source:HGNC Symbol;Acc:HGNC:5382]	3417	O75874;A0A024R3Y6	GO:0006097//glyoxylate cycle;GO:0006099//tricarboxylic acid cycle;GO:0006102//isocitrate metabolic process;GO:0006103//2-oxoglutarate metabolic process;GO:0006739//NADP metabolic process;GO:0006749//glutathione metabolic process;GO:0006979//response to oxidative stress;GO:0008585//female gonad development;GO:0014070//response to organic cyclic compound;GO:0048545//response to steroid hormone;GO:0…	GO:0005576//extracellular region;GO:0005737//cytoplasm;GO:0005739//mitochondrion;GO:0005777//peroxisome;GO:0005782//peroxisomal matrix;GO:0005829//cytosol;GO:0034774//secretory granule lumen;GO:0070062//extracellular exosome;GO:1904724//tertiary granule lumen;GO:1904813//ficolin-1-rich granule lumen;	GO:0000287//magnesium ion binding;GO:0004450//isocitrate dehydrogenase (NADP+) activity;GO:0005515//protein binding;GO:0016491//oxidoreductase activity;GO:0016616//oxidoreductase activity, acting on the CH-OH group of donors, NAD or NADP as acceptor;GO:0042802//identical protein binding;GO:0042803//protein homodimerization activity;GO:0045296//cadherin binding;GO:0046872//metal ion binding;GO:005…	ko05230(Central carbon metabolism in cancer);ko04146(Peroxisome);ko00480(Glutathione metabolism);ko00020(Citrate cycle (TCA cycle))	IDH1
ENSG00000117399	1838.36	94.0739730480701	76.6754966910006	76.6114561338276	16.8962516973363	15.860181978846	29.281460244393	0.2465	-2.021	2.674e-18	5.121e-16	Down Regulation	1	43358981	43363203	+	2012	CDC20	GO:0000922;GO:0005515;GO:0005654;GO:0005680;GO:0005737;GO:0005813;GO:0005815;GO:0005819;GO:0005829;GO:0005856;GO:0007049;GO:0007064;GO:0007094;GO:0007346;GO:0007399;GO:0008022;GO:0008284;GO:0010997;GO:0016567;GO:0019899;GO:0030154;GO:0031145;GO:0031915;GO:0032991;GO:0033597;GO:0040020;GO:0042826;GO:0048471;GO:0050773;GO:0051301;GO:0051444;GO:0051445;GO:0090129;GO:0090307;GO:0097027;GO:1904668;GO:…	K03363	-	O;C;D	KOG0305;35KS3;38D8U;3BCPV;3CRM8;3J7X1;4826T;493HW;4MC6U;4N2DV	cell division cycle 20 [Source:HGNC Symbol;Acc:HGNC:1723]	991	Q12834	GO:0007049//cell cycle;GO:0007064//mitotic sister chromatid cohesion;GO:0007094//mitotic spindle assembly checkpoint signaling;GO:0007346//regulation of mitotic cell cycle;GO:0007399//nervous system development;GO:0008284//positive regulation of cell population proliferation;GO:0016567//protein ubiquitination;GO:0030154//cell differentiation;GO:0031145//anaphase-promoting complex-dependent catabo…	GO:0000922//spindle pole;GO:0005654//nucleoplasm;GO:0005680//anaphase-promoting complex;GO:0005737//cytoplasm;GO:0005813//centrosome;GO:0005815//microtubule organizing center;GO:0005819//spindle;GO:0005829//cytosol;GO:0005856//cytoskeleton;GO:0032991//protein-containing complex;GO:0033597//mitotic checkpoint complex;GO:0048471//perinuclear region of cytoplasm;	GO:0005515//protein binding;GO:0008022//protein C-terminus binding;GO:0010997//anaphase-promoting complex binding;GO:0019899//enzyme binding;GO:0042826//histone deacetylase binding;GO:0097027//ubiquitin-protein transferase activator activity;GO:1990757//ubiquitin ligase activator activity;	ko05203(Viral carcinogenesis);ko05166(Human T-cell leukemia virus 1 infection);ko04120(Ubiquitin mediated proteolysis);ko04114(Oocyte meiosis);ko04110(Cell cycle)	CDC20
ENSG00000179750	131.147	7.5288231802366	5.87152075335706	6.53876581180902	0.942134048763362	0.782087856194957	1.73879675380556	0.1702	-2.555	2.846e-18	5.38e-16	Down Regulation	22	38982347	38992804	+	1896	APOBEC3B	GO:0000932;GO:0002376;GO:0003723;GO:0003824;GO:0004126;GO:0005515;GO:0005634;GO:0005654;GO:0005737;GO:0008270;GO:0009972;GO:0010529;GO:0016554;GO:0016787;GO:0045087;GO:0045869;GO:0046872;GO:0047844;GO:0051607;GO:0070383;GO:0080111	K18750	EC:3.5.4.-	S;L	KOG4075;35PAG;39HZR;3BJ1S;3D643;3J3VE;482BV;48WPP;4MKF7;4MZW5	apolipoprotein B mRNA editing enzyme catalytic subunit 3B [Source:HGNC Symbol;Acc:HGNC:17352]	9582	Q9UH17	GO:0002376//immune system process;GO:0009972//cytidine deamination;GO:0010529//negative regulation of transposition;GO:0016554//cytidine to uridine editing;GO:0045087//innate immune response;GO:0045869//negative regulation of single stranded viral RNA replication via double stranded DNA intermediate;GO:0051607//defense response to virus;GO:0070383//DNA cytosine deamination;GO:0080111//DNA demethy…	GO:0000932//P-body;GO:0005634//nucleus;GO:0005654//nucleoplasm;GO:0005737//cytoplasm;	GO:0003723//RNA binding;GO:0003824//catalytic activity;GO:0004126//cytidine deaminase activity;GO:0005515//protein binding;GO:0008270//zinc ion binding;GO:0016787//hydrolase activity;GO:0046872//metal ion binding;GO:0047844//deoxycytidine deaminase activity;	ko05170(Human immunodeficiency virus 1 infection)	APOBEC3B
ENSG00000100297	1002.17	13.7620685500526	12.5989921024721	13.6055065028324	1.95851235680427	1.23229843080458	3.56159335079014	0.1656	-2.594	3.367e-18	6.215e-16	Down Regulation	22	35400134	35425431	+	7268	MCM5	GO:0000166;GO:0000727;GO:0000781;GO:0003677;GO:0003678;GO:0003688;GO:0003697;GO:0004386;GO:0005515;GO:0005524;GO:0005634;GO:0005654;GO:0005694;GO:0005737;GO:0005829;GO:0006259;GO:0006260;GO:0006268;GO:0006270;GO:0007049;GO:0016020;GO:0016787;GO:0016887;GO:0017116;GO:0030174;GO:0032508;GO:0042555;GO:0043138;GO:0051301;GO:0071162	K02209	EC:5.6.2.3	L	KOG0481;35FRR;38CHZ;3BDQX;3D1W6;3J274;48BF1;48V3K;4MEA3;4MS39	minichromosome maintenance complex component 5 [Source:HGNC Symbol;Acc:HGNC:6948]	4174	P33992;B1AHB0	GO:0000727//double-strand break repair via break-induced replication;GO:0006259//DNA metabolic process;GO:0006260//DNA replication;GO:0006268//DNA unwinding involved in DNA replication;GO:0006270//DNA replication initiation;GO:0007049//cell cycle;GO:0030174//regulation of DNA-dependent DNA replication initiation;GO:0032508//DNA duplex unwinding;GO:0051301//cell division;	GO:0000781//chromosome, telomeric region;GO:0005634//nucleus;GO:0005654//nucleoplasm;GO:0005694//chromosome;GO:0005737//cytoplasm;GO:0005829//cytosol;GO:0016020//membrane;GO:0042555//MCM complex;GO:0071162//CMG complex;	GO:0000166//nucleotide binding;GO:0003677//DNA binding;GO:0003678//DNA helicase activity;GO:0003688//DNA replication origin binding;GO:0003697//single-stranded DNA binding;GO:0004386//helicase activity;GO:0005515//protein binding;GO:0005524//ATP binding;GO:0016787//hydrolase activity;GO:0016887//ATP hydrolysis activity;GO:0017116//single-stranded DNA helicase activity;GO:0043138//3'-5' DNA helica…	ko04110(Cell cycle);ko03030(DNA replication)	MCM5
ENSG00000040275	1608.06	29.7686805560612	25.6110418886007	27.2491547784937	9.62116169347343	9.01814287498164	12.9006378631851	0.3761	-1.411	3.373e-18	6.215e-16	Down Regulation	5	169583636	169604778	+	4775	SPDL1	GO:0000132;GO:0000775;GO:0000776;GO:0000922;GO:0000940;GO:0005515;GO:0005634;GO:0005694;GO:0005737;GO:0005815;GO:0005829;GO:0005856;GO:0007049;GO:0007080;GO:0007094;GO:0016477;GO:0019899;GO:0034501;GO:0043515;GO:0051301	K26098	-	D;B	2S27G;3599N;39HIC;3BAQD;3D3TX;3JFYS;487IK;494JK;4MBSV;4N247	spindle apparatus coiled-coil protein 1 [Source:HGNC Symbol;Acc:HGNC:26010]	54908	Q96EA4	GO:0000132//establishment of mitotic spindle orientation;GO:0007049//cell cycle;GO:0007080//mitotic metaphase plate congression;GO:0007094//mitotic spindle assembly checkpoint signaling;GO:0016477//cell migration;GO:0034501//protein localization to kinetochore;GO:0051301//cell division;	GO:0000775//chromosome, centromeric region;GO:0000776//kinetochore;GO:0000922//spindle pole;GO:0000940//outer kinetochore;GO:0005634//nucleus;GO:0005694//chromosome;GO:0005737//cytoplasm;GO:0005815//microtubule organizing center;GO:0005829//cytosol;GO:0005856//cytoskeleton;	GO:0005515//protein binding;GO:0019899//enzyme binding;GO:0043515//kinetochore binding;	-	SPDL1
ENSG00000184900	873.749	31.3315541769877	23.8696458841044	28.7399	7.31481565715375	6.3829361808436	10.6593587235489	0.2853	-1.81	4.244e-18	7.725e-16	Down Regulation	21	44805617	44818779	-	2732	SUMO3	GO:0000776;GO:0005515;GO:0005634;GO:0005654;GO:0005737;GO:0016605;GO:0016925;GO:0031386;GO:0043392;GO:0044389;GO:1900180	K12160	-	O	KOG1769;35QDD;3A3FU;3BRHB;3D850;3JHF3;48F77;49C4C;4MJSW;4N7EY	small ubiquitin like modifier 3 [Source:HGNC Symbol;Acc:HGNC:11124]	6612	P55854	GO:0016925//protein sumoylation;GO:0043392//negative regulation of DNA binding;GO:1900180//regulation of protein localization to nucleus;	GO:0000776//kinetochore;GO:0005634//nucleus;GO:0005654//nucleoplasm;GO:0005737//cytoplasm;GO:0016605//PML body;	GO:0005515//protein binding;GO:0031386//protein tag;GO:0044389//ubiquitin-like protein ligase binding;	ko05418(Fluid shear stress and atherosclerosis);ko03013(Nucleocytoplasmic transport)	SUMO3
ENSG00000188643	386.506	20.7589495726119	16.682371791535	19.7826908209128	6.85871925887648	5.33508058854515	7.57306240490821	0.3403	-1.555	7.42e-18	1.334e-15	Down Regulation	1	153606886	153613145	-	1701	S100A16	GO:0003723;GO:0005509;GO:0005515;GO:0005615;GO:0005634;GO:0005730;GO:0005737;GO:0005829;GO:0005886;GO:0042802;GO:0042803;GO:0046872;GO:0048306;GO:0051592;GO:0070062	K23768	-	S	2S6F9;35Q71;3A2AN;3BQZ4;3D77G;3JGY8;48EXN;49BRR;4MJYT;4N77N	S100 calcium binding protein A16 [Source:HGNC Symbol;Acc:HGNC:20441]	140576	Q96FQ6	GO:0051592//response to calcium ion;	GO:0005615//extracellular space;GO:0005634//nucleus;GO:0005730//nucleolus;GO:0005737//cytoplasm;GO:0005829//cytosol;GO:0005886//plasma membrane;GO:0070062//extracellular exosome;	GO:0003723//RNA binding;GO:0005509//calcium ion binding;GO:0005515//protein binding;GO:0042802//identical protein binding;GO:0042803//protein homodimerization activity;GO:0046872//metal ion binding;GO:0048306//calcium-dependent protein binding;	-	S100A16
ENSG00000099901	1921.96	35.9712041859189	34.1715929110643	32.8657698891738	11.7200863890806	10.3220970959125	16.0820717942403	0.3647	-1.455	7.751e-18	1.377e-15	Down Regulation	22	20115938	20127355	+	4620	RANBP1	GO:0005092;GO:0005096;GO:0005515;GO:0005634;GO:0005635;GO:0005643;GO:0005737;GO:0005813;GO:0005829;GO:0006913;GO:0007051;GO:0007165;GO:0031267;GO:0045296;GO:0046604;GO:0046907;GO:0050790	K15306	-	U	KOG0864;35JGT;38EUB;3BACZ;3CZPW;3J773;480Q4;48YYV;4MCHW;4MX0R	RAN binding protein 1 [Source:HGNC Symbol;Acc:HGNC:9847]	5902	P43487;A0A140VK94	GO:0006913//nucleocytoplasmic transport;GO:0007051//spindle organization;GO:0007165//signal transduction;GO:0046604//positive regulation of mitotic centrosome separation;GO:0046907//intracellular transport;GO:0050790//regulation of catalytic activity;	GO:0005634//nucleus;GO:0005635//nuclear envelope;GO:0005643//nuclear pore;GO:0005737//cytoplasm;GO:0005813//centrosome;GO:0005829//cytosol;	GO:0005092//GDP-dissociation inhibitor activity;GO:0005096//GTPase activator activity;GO:0005515//protein binding;GO:0031267//small GTPase binding;GO:0045296//cadherin binding;	ko05203(Viral carcinogenesis);ko05166(Human T-cell leukemia virus 1 infection)	RANBP1
ENSG00000132749	268.499	4.40387317363048	3.40300367563208	4.18114403463701	1.08962221281446	1.13729543522795	1.48699311265735	0.3051	-1.712	8.686e-18	1.524e-15	Down Regulation	11	68707440	68751520	-	5789	TESMIN	GO:0001673;GO:0005515;GO:0005634;GO:0005737;GO:0006355;GO:0006875;GO:0007140;GO:0007283;GO:0010038;GO:0030154;GO:0043231;GO:0046872;GO:0051321	-	-	S;P	KOG1171;35I99;39UBY;3BA99;3D0VP;3JEMB;48947;498D4;4MAKB;4N55X	testis expressed metallothionein like protein [Source:HGNC Symbol;Acc:HGNC:7446]	9633	Q9Y4I5	GO:0006355//regulation of transcription, DNA-templated;GO:0006875//cellular metal ion homeostasis;GO:0007140//male meiotic nuclear division;GO:0007283//spermatogenesis;GO:0010038//response to metal ion;GO:0030154//cell differentiation;GO:0051321//meiotic cell cycle;	GO:0001673//male germ cell nucleus;GO:0005634//nucleus;GO:0005737//cytoplasm;GO:0043231//intracellular membrane-bounded organelle;	GO:0005515//protein binding;GO:0046872//metal ion binding;	-	TESMIN
ENSG00000132773	236.157	8.98498046387095	7.49825102045239	8.8879043834816	2.88813230342916	2.4148007333873	3.26227	0.3329	-1.587	9.674e-18	1.672e-15	Down Regulation	1	45340052	45343973	+	2358	TOE1	GO:0000175;GO:0003676;GO:0003723;GO:0004535;GO:0005515;GO:0005634;GO:0005654;GO:0005730;GO:0005737;GO:0015030;GO:0016604;GO:0016607;GO:0017069;GO:0034472;GO:0046872;GO:0090503	K13202	-	S;K;L	KOG1990;35A49;38CXW;3BH5I;3CW3M;3JAEP;487EI;494NQ;4MITR;4MUGB	target of EGR1, exonuclease [Source:HGNC Symbol;Acc:HGNC:15954]	114034	Q96GM8	GO:0034472//snRNA 3'-end processing;GO:0090503//RNA phosphodiester bond hydrolysis, exonucleolytic;	GO:0005634//nucleus;GO:0005654//nucleoplasm;GO:0005730//nucleolus;GO:0005737//cytoplasm;GO:0015030//Cajal body;GO:0016604//nuclear body;GO:0016607//nuclear speck;	GO:0000175//3'-5'-exoribonuclease activity;GO:0003676//nucleic acid binding;GO:0003723//RNA binding;GO:0004535//poly(A)-specific ribonuclease activity;GO:0005515//protein binding;GO:0017069//snRNA binding;GO:0046872//metal ion binding;	-	TOE1
ENSG00000138092	482.706	7.13446514265064	7.09081615317579	7.93847407148804	2.35708518968655	1.96708560556906	3.19749254449155	0.3345	-1.58	9.754e-18	1.672e-15	Down Regulation	2	24793136	24822376	+	5518	CENPO	GO:0000775;GO:0000776;GO:0005515;GO:0005634;GO:0005654;GO:0005694;GO:0005829;GO:0016604;GO:0031511;GO:0034508	K11507	-	S	2RY72;35GCA;39WC8;3BDXE;3D1BI;3J7AF;487VQ;49360;4MF2Z;4N4WH	centromere protein O [Source:HGNC Symbol;Acc:HGNC:28152]	79172	Q9BU64	GO:0034508//centromere complex assembly;	GO:0000775//chromosome, centromeric region;GO:0000776//kinetochore;GO:0005634//nucleus;GO:0005654//nucleoplasm;GO:0005694//chromosome;GO:0005829//cytosol;GO:0016604//nuclear body;GO:0031511//Mis6-Sim4 complex;	GO:0005515//protein binding;	-	CENPO
ENSG00000221978	5160.15	31.5145170785097	31.5842727871146	31.1917724034824	56.9962871282016	51.1906564596082	54.3142298478511	1.7043	0.7691	1.027e-17	1.725e-15	Nodiff	1	1385711	1399335	-	6842	CCNL2	GO:0000307;GO:0005515;GO:0005634;GO:0005654;GO:0006357;GO:0016538;GO:0016607;GO:0042981;GO:0043231;GO:0043484;GO:0046605;GO:0050790;GO:0051726	K23966	-	D;K;L	KOG0835;35FBS;38BYW;3BF28;3CV11;3J2C4;481KZ;494ZM;4MAN3;4MUSN	cyclin L2 [Source:HGNC Symbol;Acc:HGNC:20570]	81669	Q96S94	GO:0006357//regulation of transcription by RNA polymerase II;GO:0042981//regulation of apoptotic process;GO:0043484//regulation of RNA splicing;GO:0046605//regulation of centrosome cycle;GO:0050790//regulation of catalytic activity;GO:0051726//regulation of cell cycle;	GO:0000307//cyclin-dependent protein kinase holoenzyme complex;GO:0005634//nucleus;GO:0005654//nucleoplasm;GO:0016607//nuclear speck;GO:0043231//intracellular membrane-bounded organelle;	GO:0005515//protein binding;GO:0016538//cyclin-dependent protein serine/threonine kinase regulator activity;	-	CCNL2
ENSG00000010278	1084.48	13.2240698659349	14.305006674119	13.6524520026697	6.98127148769053	7.0618629012858	7.94952381044475	0.5283	-0.9206	1.03e-17	1.725e-15	Nodiff	12	6199715	6238271	+	5829	CD9	GO:0005178;GO:0005515;GO:0005576;GO:0005615;GO:0005886;GO:0005887;GO:0005925;GO:0007155;GO:0007338;GO:0007342;GO:0008283;GO:0008285;GO:0008347;GO:0009897;GO:0014905;GO:0016020;GO:0016021;GO:0030168;GO:0030666;GO:0030669;GO:0030913;GO:0031092;GO:0031623;GO:0032991;GO:0035036;GO:0070062;GO:0071404;GO:0090331;GO:1903561;GO:1905521	K06460	-	S	KOG3882;35J21;39RT3;3BDRA;3CSI2;3JCPD;47ZJK;4949V;4MDY5;4N5FC	CD9 molecule [Source:HGNC Symbol;Acc:HGNC:1709]	928	P21926	GO:0007155//cell adhesion;GO:0007338//single fertilization;GO:0007342//fusion of sperm to egg plasma membrane involved in single fertilization;GO:0008283//cell population proliferation;GO:0008285//negative regulation of cell population proliferation;GO:0008347//glial cell migration;GO:0014905//myoblast fusion involved in skeletal muscle regeneration;GO:0030168//platelet activation;GO:0030913//par…	GO:0005576//extracellular region;GO:0005615//extracellular space;GO:0005886//plasma membrane;GO:0005887//integral component of plasma membrane;GO:0005925//focal adhesion;GO:0009897//external side of plasma membrane;GO:0016020//membrane;GO:0016021//integral component of membrane;GO:0030666//endocytic vesicle membrane;GO:0030669//clathrin-coated endocytic vesicle membrane;GO:0031092//platelet alpha…	GO:0005178//integrin binding;GO:0005515//protein binding;	ko04640(Hematopoietic cell lineage)	CD9
ENSG00000177169	2082.62	5.65280560149495	5.31383053142326	4.52452192716342	27.7129286822118	34.0235559728912	15.4871062049219	4.9599	2.3103	1.073e-17	1.778e-15	Up Regulation	12	131894622	131923150	+	7620	ULK1	GO:0000045;GO:0000166;GO:0000407;GO:0000422;GO:0004672;GO:0004674;GO:0005515;GO:0005524;GO:0005737;GO:0005741;GO:0005776;GO:0005789;GO:0005829;GO:0006468;GO:0006914;GO:0007165;GO:0007409;GO:0008104;GO:0008285;GO:0010508;GO:0016236;GO:0016241;GO:0016301;GO:0016310;GO:0016740;GO:0018105;GO:0018107;GO:0030424;GO:0031102;GO:0031175;GO:0031267;GO:0031333;GO:0031669;GO:0034045;GO:0034727;GO:0042594;GO:…	K21357	EC:2.7.11.1	T	KOG0595;35AQQ;38DJF;3BG3W;3CXCA;3J2Q0;485ZE;495I8;4MC3H;4MUB3	unc-51 like autophagy activating kinase 1 [Source:HGNC Symbol;Acc:HGNC:12558]	8408	O75385	GO:0000045//autophagosome assembly;GO:0000422//autophagy of mitochondrion;GO:0006468//protein phosphorylation;GO:0006914//autophagy;GO:0007165//signal transduction;GO:0007409//axonogenesis;GO:0008104//protein localization;GO:0008285//negative regulation of cell population proliferation;GO:0010508//positive regulation of autophagy;GO:0016236//macroautophagy;GO:0016241//regulation of macroautophagy…	GO:0000407//phagophore assembly site;GO:0005737//cytoplasm;GO:0005741//mitochondrial outer membrane;GO:0005776//autophagosome;GO:0005789//endoplasmic reticulum membrane;GO:0005829//cytosol;GO:0030424//axon;GO:0034045//phagophore assembly site membrane;GO:0055037//recycling endosome;GO:0097629//extrinsic component of omegasome membrane;GO:0097632//extrinsic component of phagophore assembly site me…	GO:0000166//nucleotide binding;GO:0004672//protein kinase activity;GO:0004674//protein serine/threonine kinase activity;GO:0005515//protein binding;GO:0005524//ATP binding;GO:0016301//kinase activity;GO:0016740//transferase activity;GO:0031267//small GTPase binding;GO:0042802//identical protein binding;GO:0044877//protein-containing complex binding;GO:0051020//GTPase binding;GO:0106310//protein s…	ko05022(Pathways of neurodegeneration - multiple diseases);ko05017(Spinocerebellar ataxia);ko05016(Huntington disease);ko05014(Amyotrophic lateral sclerosis);ko05010(Alzheimer disease);ko04211(Longevity regulating pathway);ko04152(AMPK signaling pathway);ko04150(mTOR signaling pathway);ko04140(Autophagy - animal);ko04137(Mitophagy - animal)	ULK1
ENSG00000166833	645.178	3.66349517918735	3.05569472014721	3.47314714776836	1.3732619714538	1.25965973159556	1.59855435634712	0.4094	-1.288	1.327e-17	2.154e-15	Down Regulation	11	19350724	20121601	+	15162	NAV2	GO:0000166;GO:0003025;GO:0004386;GO:0005515;GO:0005524;GO:0005614;GO:0005634;GO:0005654;GO:0007399;GO:0007605;GO:0007608;GO:0007626;GO:0008201;GO:0016787;GO:0016887;GO:0021554;GO:0021563;GO:0021564;GO:0022008;GO:0031012;GO:0032508;GO:0043138	K19483	EC:5.6.2.4	Z	2QPT3;359CX;38FX8;3BF0Q;3CR89;3JCK3;483QK;4905Q;4MM4F;4MYBN	neuron navigator 2 [Source:HGNC Symbol;Acc:HGNC:15997]	89797	Q8IVL1;A7E2D6	GO:0003025//regulation of systemic arterial blood pressure by baroreceptor feedback;GO:0007399//nervous system development;GO:0007605//sensory perception of sound;GO:0007608//sensory perception of smell;GO:0007626//locomotory behavior;GO:0021554//optic nerve development;GO:0021563//glossopharyngeal nerve development;GO:0021564//vagus nerve development;GO:0022008//neurogenesis;GO:0032508//DNA dupl…	GO:0005614//interstitial matrix;GO:0005634//nucleus;GO:0005654//nucleoplasm;GO:0031012//extracellular matrix;	GO:0000166//nucleotide binding;GO:0004386//helicase activity;GO:0005515//protein binding;GO:0005524//ATP binding;GO:0008201//heparin binding;GO:0016787//hydrolase activity;GO:0016887//ATP hydrolysis activity;GO:0043138//3'-5' DNA helicase activity;	-	NAV2
ENSG00000105974	7452.56	152.603218051445	146.542107158114	148.184526638542	69.6469185549173	57.3660714619238	79.6599873721795	0.4557	-1.134	1.329e-17	2.154e-15	Down Regulation	7	116524994	116561179	+	3868	CAV1	GO:0000122;GO:0000139;GO:0000165;GO:0001525;GO:0001570;GO:0001666;GO:0001935;GO:0001937;GO:0001960;GO:0002026;GO:0002067;GO:0002080;GO:0002095;GO:0002931;GO:0003057;GO:0005102;GO:0005113;GO:0005515;GO:0005768;GO:0005783;GO:0005789;GO:0005794;GO:0005811;GO:0005886;GO:0005887;GO:0005901;GO:0005925;GO:0005929;GO:0005938;GO:0006641;GO:0006809;GO:0006816;GO:0006874;GO:0006940;GO:0007260;GO:0007519;GO:…	K06278	-	T;K;U	2QUK5;35UBM;39KZD;3BGQB;3E49I;3JNGW;48QYI;49MIG;4MD41;4N0AU	caveolin 1 [Source:HGNC Symbol;Acc:HGNC:1527]	857	Q03135;Q2TNI1;Q59E85	GO:0000122//negative regulation of transcription by RNA polymerase II;GO:0000165//MAPK cascade;GO:0001525//angiogenesis;GO:0001570//vasculogenesis;GO:0001666//response to hypoxia;GO:0001935//endothelial cell proliferation;GO:0001937//negative regulation of endothelial cell proliferation;GO:0001960//negative regulation of cytokine-mediated signaling pathway;GO:0002026//regulation of the force of h…	GO:0000139//Golgi membrane;GO:0002080//acrosomal membrane;GO:0002095//caveolar macromolecular signaling complex;GO:0005768//endosome;GO:0005783//endoplasmic reticulum;GO:0005789//endoplasmic reticulum membrane;GO:0005794//Golgi apparatus;GO:0005811//lipid droplet;GO:0005886//plasma membrane;GO:0005887//integral component of plasma membrane;GO:0005901//caveola;GO:0005925//focal adhesion;GO:0005929…	GO:0005102//signaling receptor binding;GO:0005113//patched binding;GO:0005515//protein binding;GO:0015485//cholesterol binding;GO:0016504//peptidase activator activity;GO:0019899//enzyme binding;GO:0019901//protein kinase binding;GO:0030674//protein-macromolecule adaptor activity;GO:0031267//small GTPase binding;GO:0042802//identical protein binding;GO:0044325//transmembrane transporter binding;G…	ko05418(Fluid shear stress and atherosclerosis);ko05416(Viral myocarditis);ko05205(Proteoglycans in cancer);ko05100(Bacterial invasion of epithelial cells);ko05020(Prion disease);ko04510(Focal adhesion);ko04144(Endocytosis)	CAV1
ENSG00000150627	421.08	1.99036161014709	1.72784762828682	1.73300583883293	4.60110081480251	4.09058917336728	4.24172396156884	2.3422	1.2279	1.403e-17	2.248e-15	Up Regulation	4	176065841	176182818	+	7801	WDR17	GO:0005515;GO:0016020;GO:0016021	K24740	-	O;B	KOG0273;35E58;39SW7;3BF1F;3CR5E;3JAA5;481TX;491MT;4MDAE;4N0T7	WD repeat domain 17 [Source:HGNC Symbol;Acc:HGNC:16661]	116966	Q8IZU2	-	GO:0016020//membrane;GO:0016021//integral component of membrane;	GO:0005515//protein binding;	-	WDR17
ENSG00000099875	3413.12	15.8289031388436	19.9531285720457	17.5942484723958	62.7817486515138	64.3349155501425	41.8622654588342	3.1489	1.6548	1.646e-17	2.609e-15	Up Regulation	19	2037465	2051244	-	5221	MKNK2	GO:0000166;GO:0004672;GO:0004674;GO:0004683;GO:0005515;GO:0005516;GO:0005524;GO:0005634;GO:0005654;GO:0005737;GO:0006417;GO:0006468;GO:0006915;GO:0007166;GO:0009931;GO:0016301;GO:0016310;GO:0016604;GO:0016605;GO:0016740;GO:0018105;GO:0030097;GO:0035556;GO:0046777;GO:0046872;GO:0071243;GO:0097192;GO:0106310	K04372	EC:2.7.11.1	T	KOG0607;35H2U;38BRN;3BFTK;3D1KZ;3J9XF;480XR;48Y4T;4M8QN;4MY6N	MAPK interacting serine/threonine kinase 2 [Source:HGNC Symbol;Acc:HGNC:7111]	2872	Q9HBH9;B3KS07	GO:0006417//regulation of translation;GO:0006468//protein phosphorylation;GO:0006915//apoptotic process;GO:0007166//cell surface receptor signaling pathway;GO:0016310//phosphorylation;GO:0018105//peptidyl-serine phosphorylation;GO:0030097//hemopoiesis;GO:0035556//intracellular signal transduction;GO:0046777//protein autophosphorylation;GO:0071243//cellular response to arsenic-containing substance…	GO:0005634//nucleus;GO:0005654//nucleoplasm;GO:0005737//cytoplasm;GO:0016604//nuclear body;GO:0016605//PML body;	GO:0000166//nucleotide binding;GO:0004672//protein kinase activity;GO:0004674//protein serine/threonine kinase activity;GO:0004683//calmodulin-dependent protein kinase activity;GO:0005515//protein binding;GO:0005516//calmodulin binding;GO:0005524//ATP binding;GO:0009931//calcium-dependent protein serine/threonine kinase activity;GO:0016301//kinase activity;GO:0016740//transferase activity;GO:0046…	ko04910(Insulin signaling pathway);ko04066(HIF-1 signaling pathway);ko04010(MAPK signaling pathway)	MKNK2
ENSG00000167513	190.545	6.64190368980507	6.66314991545716	5.56133539439161	1.43598638030263	1.03153987850131	2.07927611815783	0.237	-2.077	1.925e-17	3.019e-15	Down Regulation	16	88803789	88809258	+	2760	CDT1	GO:0000076;GO:0000278;GO:0000775;GO:0000776;GO:0003677;GO:0003682;GO:0005515;GO:0005634;GO:0005654;GO:0005694;GO:0006260;GO:0007049;GO:0007059;GO:0016604;GO:0030174;GO:0031334;GO:0033044;GO:0033262;GO:0035563;GO:0045740;GO:0045786;GO:0051301;GO:0051315;GO:0051383;GO:0070182;GO:0071163;GO:0072708;GO:1902426;GO:1902595;GO:1905341;GO:1905342;GO:2000104;GO:2000105	K10727	-	L	KOG4762;35FPB;38HTF;3BDTD;3CTBB;3JCBD;484FR;48WEV;4M87V;4N4UW	chromatin licensing and DNA replication factor 1 [Source:HGNC Symbol;Acc:HGNC:24576]	81620	Q9H211	GO:0000076//DNA replication checkpoint signaling;GO:0000278//mitotic cell cycle;GO:0006260//DNA replication;GO:0007049//cell cycle;GO:0007059//chromosome segregation;GO:0030174//regulation of DNA-dependent DNA replication initiation;GO:0031334//positive regulation of protein-containing complex assembly;GO:0033044//regulation of chromosome organization;GO:0033262//regulation of nuclear cell cycle …	GO:0000775//chromosome, centromeric region;GO:0000776//kinetochore;GO:0005634//nucleus;GO:0005654//nucleoplasm;GO:0005694//chromosome;GO:0016604//nuclear body;	GO:0003677//DNA binding;GO:0003682//chromatin binding;GO:0005515//protein binding;GO:0070182//DNA polymerase binding;	-	CDT1
ENSG00000149636	813.82	24.2661	22.9120830033498	22.8469722664534	9.74174861703233	8.96525	12.0809377963485	0.4337	-1.205	2.158e-17	3.35e-15	Down Regulation	20	36751791	36773818	-	2739	DSN1	GO:0000070;GO:0000444;GO:0000775;GO:0000776;GO:0001650;GO:0005515;GO:0005576;GO:0005634;GO:0005654;GO:0005694;GO:0005730;GO:0005829;GO:0007049;GO:0007059;GO:0016604;GO:0031617;GO:0035578;GO:0051301	K11544	-	S	2S0JV;35JTD;3955Q;3BMAY;3D36Q;3JD3X;487CF;48UU0;4MC1S;4MZUN	DSN1 component of MIS12 kinetochore complex [Source:HGNC Symbol;Acc:HGNC:16165]	79980	Q9H410	GO:0000070//mitotic sister chromatid segregation;GO:0007049//cell cycle;GO:0007059//chromosome segregation;GO:0051301//cell division;	GO:0000444//MIS12/MIND type complex;GO:0000775//chromosome, centromeric region;GO:0000776//kinetochore;GO:0001650//fibrillar center;GO:0005576//extracellular region;GO:0005634//nucleus;GO:0005654//nucleoplasm;GO:0005694//chromosome;GO:0005730//nucleolus;GO:0005829//cytosol;GO:0016604//nuclear body;GO:0031617//NMS complex;GO:0035578//azurophil granule lumen;	GO:0005515//protein binding;	-	DSN1
ENSG00000187741	394.922	2.61494081185948	2.41482458051495	2.62199867327707	1.0469919772582	0.948746993644335	1.22934957239214	0.4159	-1.266	2.31e-17	3.547e-15	Down Regulation	16	89726683	89816977	-	12316	FANCA	GO:0000785;GO:0005515;GO:0005634;GO:0005654;GO:0005737;GO:0006281;GO:0006513;GO:0006974;GO:0007140;GO:0008584;GO:0008585;GO:0036297;GO:0043240;GO:0045589;GO:0050727;GO:0051090;GO:0065003;GO:1905936;GO:2000348	K10888	-	S;K	2QT8N;35G9N;39HFH;3BCSD;3D02X;3JF52;483I8;4936T;4M5QY;4MT40	FA complementation group A [Source:HGNC Symbol;Acc:HGNC:3582]	2175	O15360	GO:0006281//DNA repair;GO:0006513//protein monoubiquitination;GO:0006974//cellular response to DNA damage stimulus;GO:0007140//male meiotic nuclear division;GO:0008584//male gonad development;GO:0008585//female gonad development;GO:0036297//interstrand cross-link repair;GO:0045589//regulation of regulatory T cell differentiation;GO:0050727//regulation of inflammatory response;GO:0051090//regulati…	GO:0000785//chromatin;GO:0005634//nucleus;GO:0005654//nucleoplasm;GO:0005737//cytoplasm;GO:0043240//Fanconi anaemia nuclear complex;	GO:0005515//protein binding;	ko03460(Fanconi anemia pathway)	FANCA
ENSG00000185291	65.6627	0.263613088637647	0.382951611570863	0.448809523056165	3.06854712548979	5.54980519427607	3.32032222227667	10.941	3.4517	2.576e-17	3.915e-15	Up Regulation	X	1336616	1382689	+	1710	IL3RA	GO:0004896;GO:0004912;GO:0005515;GO:0005886;GO:0009897;GO:0016020;GO:0016021;GO:0019221;GO:0019955;GO:0036016;GO:0038156;GO:0043235	K04737	-	S;T	2RZVR;35EPN;3AFQX;3BWYD;3D0X1;3J85E;48DDP;495HE;4MGUR;4N7Q1	interleukin 3 receptor subunit alpha [Source:HGNC Symbol;Acc:HGNC:6012]	3563	P26951	GO:0019221//cytokine-mediated signaling pathway;GO:0036016//cellular response to interleukin-3;GO:0038156//interleukin-3-mediated signaling pathway;	GO:0005886//plasma membrane;GO:0009897//external side of plasma membrane;GO:0016020//membrane;GO:0016021//integral component of membrane;GO:0043235//receptor complex;	GO:0004896//cytokine receptor activity;GO:0004912//interleukin-3 receptor activity;GO:0005515//protein binding;GO:0019955//cytokine binding;	ko05200(Pathways in cancer);ko04640(Hematopoietic cell lineage);ko04630(JAK-STAT signaling pathway);ko04210(Apoptosis);ko04151(PI3K-Akt signaling pathway);ko04060(Cytokine-cytokine receptor interaction)	IL3RA
ENSG00000065328	544.381	10.9242887355154	8.49165017354691	9.30548280800807	1.28913155077765	1.05451130358158	2.69672135839884	0.1719	-2.54	3.17e-17	4.769e-15	Down Regulation	10	13161558	13211110	+	5456	MCM10	GO:0003677;GO:0003688;GO:0003690;GO:0003697;GO:0005515;GO:0005634;GO:0005654;GO:0005730;GO:0006260;GO:0006270;GO:0006974;GO:0008283;GO:0019899;GO:0031298;GO:0042802;GO:0046872	K10736	-	T;D	KOG3056;359SV;38HKH;3BE8H;3CRHW;3J1SQ;488SP;48X9H;4MCR2;4MSA7	minichromosome maintenance 10 replication initiation factor [Source:HGNC Symbol;Acc:HGNC:18043]	55388	Q7L590	GO:0006260//DNA replication;GO:0006270//DNA replication initiation;GO:0006974//cellular response to DNA damage stimulus;GO:0008283//cell population proliferation;	GO:0005634//nucleus;GO:0005654//nucleoplasm;GO:0005730//nucleolus;GO:0031298//replication fork protection complex;	GO:0003677//DNA binding;GO:0003688//DNA replication origin binding;GO:0003690//double-stranded DNA binding;GO:0003697//single-stranded DNA binding;GO:0005515//protein binding;GO:0019899//enzyme binding;GO:0042802//identical protein binding;GO:0046872//metal ion binding;	-	MCM10
ENSG00000033867	4962.97	40.9504949610175	35.888571526551	39.439000409197	20.0042315384031	17.6349229904874	21.1609057521853	0.499	-1.003	3.334e-17	4.915e-15	Down Regulation	3	27372721	27484420	-	9616	SLC4A7	GO:0005452;GO:0005515;GO:0005886;GO:0006164;GO:0006221;GO:0006811;GO:0006814;GO:0006820;GO:0008509;GO:0008510;GO:0015293;GO:0015698;GO:0015701;GO:0016020;GO:0016021;GO:0016323;GO:0016324;GO:0022857;GO:0032420;GO:0035725;GO:0042995;GO:0050801;GO:0051453;GO:0055085;GO:0060117;GO:0071363;GO:0090383;GO:0098656	K13858	-	P;U	KOG1172;359SI;38BCI;3BA46;3CS9E;3J5JT;4814T;48Y0T;4MEK0;4N5E2	solute carrier family 4 member 7 [Source:HGNC Symbol;Acc:HGNC:11033]	9497	Q9Y6M7	GO:0006164//purine nucleotide biosynthetic process;GO:0006221//pyrimidine nucleotide biosynthetic process;GO:0006811//ion transport;GO:0006814//sodium ion transport;GO:0006820//anion transport;GO:0015698//inorganic anion transport;GO:0015701//bicarbonate transport;GO:0035725//sodium ion transmembrane transport;GO:0050801//ion homeostasis;GO:0051453//regulation of intracellular pH;GO:0055085//tran…	GO:0005886//plasma membrane;GO:0016020//membrane;GO:0016021//integral component of membrane;GO:0016323//basolateral plasma membrane;GO:0016324//apical plasma membrane;GO:0032420//stereocilium;GO:0042995//cell projection;	GO:0005452//inorganic anion exchanger activity;GO:0005515//protein binding;GO:0008509//anion transmembrane transporter activity;GO:0008510//sodium:bicarbonate symporter activity;GO:0015293//symporter activity;GO:0022857//transmembrane transporter activity;	-	SLC4A7
ENSG00000099250	3273.24	26.1343481070137	20.6830264278354	23.5845679917554	7.72256371883625	7.46438442718686	10.6608909110643	0.3616	-1.468	3.334e-17	4.915e-15	Down Regulation	10	33177492	33336262	-	11522	NRP1	GO:0001525;GO:0001569;GO:0001570;GO:0001755;GO:0001764;GO:0001938;GO:0002040;GO:0002042;GO:0002116;GO:0003148;GO:0005021;GO:0005096;GO:0005515;GO:0005576;GO:0005615;GO:0005737;GO:0005739;GO:0005769;GO:0005829;GO:0005883;GO:0005886;GO:0005887;GO:0005925;GO:0006930;GO:0007165;GO:0007229;GO:0007267;GO:0007399;GO:0007411;GO:0007413;GO:0007507;GO:0008045;GO:0008201;GO:0009611;GO:0009887;GO:0010595;GO:…	K06724	-	M;T	2QUEH;35HSY;38W8B;3BGME;3CTD4;3JC8Y;47ZVP;492DR;4MGK0;4N65J	neuropilin 1 [Source:HGNC Symbol;Acc:HGNC:8004]	8829	O14786;Q68DN3;Q59F20;Q6AWA9	GO:0001525//angiogenesis;GO:0001569//branching involved in blood vessel morphogenesis;GO:0001570//vasculogenesis;GO:0001755//neural crest cell migration;GO:0001764//neuron migration;GO:0001938//positive regulation of endothelial cell proliferation;GO:0002040//sprouting angiogenesis;GO:0002042//cell migration involved in sprouting angiogenesis;GO:0003148//outflow tract septum morphogenesis;GO:0006…	GO:0002116//semaphorin receptor complex;GO:0005576//extracellular region;GO:0005615//extracellular space;GO:0005737//cytoplasm;GO:0005739//mitochondrion;GO:0005769//early endosome;GO:0005829//cytosol;GO:0005883//neurofilament;GO:0005886//plasma membrane;GO:0005887//integral component of plasma membrane;GO:0005925//focal adhesion;GO:0016020//membrane;GO:0016021//integral component of membrane;GO:0…	GO:0005021//vascular endothelial growth factor-activated receptor activity;GO:0005096//GTPase activator activity;GO:0005515//protein binding;GO:0008201//heparin binding;GO:0015026//coreceptor activity;GO:0017154//semaphorin receptor activity;GO:0019838//growth factor binding;GO:0019901//protein kinase binding;GO:0019955//cytokine binding;GO:0038023//signaling receptor activity;GO:0038085//vascula…	ko05171(Coronavirus disease - COVID-19);ko05166(Human T-cell leukemia virus 1 infection);ko04360(Axon guidance)	NRP1
ENSG00000107731	129.629	0.131787277173038	0.183470823991157	0.198482886462831	1.91756160816677	2.99992484765146	0.98167219156201	11.5299	3.5273	3.585e-17	5.233e-15	Up Regulation	10	71212570	71302864	+	6841	UNC5B	GO:0001525;GO:0005042;GO:0005515;GO:0005886;GO:0006915;GO:0007165;GO:0007411;GO:0014068;GO:0016020;GO:0016021;GO:0033564;GO:0038007;GO:0043524;GO:0045121;GO:2001240	K07521	-	O;T	KOG1480;35P9P;38FF2;3BB3I;3CW83;3J56V;480RC;4948H;4MH26;4N48Q	unc-5 netrin receptor B [Source:HGNC Symbol;Acc:HGNC:12568]	219699	Q8IZJ1	GO:0001525//angiogenesis;GO:0006915//apoptotic process;GO:0007165//signal transduction;GO:0007411//axon guidance;GO:0014068//positive regulation of phosphatidylinositol 3-kinase signaling;GO:0033564//anterior/posterior axon guidance;GO:0038007//netrin-activated signaling pathway;GO:0043524//negative regulation of neuron apoptotic process;GO:2001240//negative regulation of extrinsic apoptotic sign…	GO:0005886//plasma membrane;GO:0016020//membrane;GO:0016021//integral component of membrane;GO:0045121//membrane raft;	GO:0005042//netrin receptor activity;GO:0005515//protein binding;	ko04360(Axon guidance)	UNC5B
ENSG00000118257	184.521	1.13177582528224	1.2684445381101	1.32125123143627	0.19683726806795	0.192077535666533	0.395408588228669	0.2074	-2.27	3.651e-17	5.278e-15	Down Regulation	2	205681990	205798133	+	13896	NRP2	GO:0001525;GO:0001764;GO:0001938;GO:0002116;GO:0003148;GO:0005021;GO:0005515;GO:0005576;GO:0005886;GO:0005887;GO:0007155;GO:0007399;GO:0007411;GO:0007507;GO:0008201;GO:0010595;GO:0016020;GO:0016021;GO:0017154;GO:0019838;GO:0019955;GO:0021612;GO:0021649;GO:0021675;GO:0021828;GO:0030154;GO:0030424;GO:0036484;GO:0036486;GO:0038023;GO:0038084;GO:0042802;GO:0046872;GO:0048846;GO:0050919;GO:0061549;GO:…	K06819	-	T;W;P;G	2QVB7;35IT0;38MV2;3BAT1;3D040;3J2N6;481Z1;48V3N;4MIP2;4N198	neuropilin 2 [Source:HGNC Symbol;Acc:HGNC:8005]	8828	O60462;Q7Z3T9	GO:0001525//angiogenesis;GO:0001764//neuron migration;GO:0001938//positive regulation of endothelial cell proliferation;GO:0003148//outflow tract septum morphogenesis;GO:0007155//cell adhesion;GO:0007399//nervous system development;GO:0007411//axon guidance;GO:0007507//heart development;GO:0010595//positive regulation of endothelial cell migration;GO:0021612//facial nerve structural organization;…	GO:0002116//semaphorin receptor complex;GO:0005576//extracellular region;GO:0005886//plasma membrane;GO:0005887//integral component of plasma membrane;GO:0016020//membrane;GO:0016021//integral component of membrane;GO:0030424//axon;GO:0098978//glutamatergic synapse;GO:0099055//integral component of postsynaptic membrane;	GO:0005021//vascular endothelial growth factor-activated receptor activity;GO:0005515//protein binding;GO:0008201//heparin binding;GO:0017154//semaphorin receptor activity;GO:0019838//growth factor binding;GO:0019955//cytokine binding;GO:0038023//signaling receptor activity;GO:0042802//identical protein binding;GO:0046872//metal ion binding;	-	NRP2
ENSG00000055609	2742.29	2.1144120978102	2.03148138156789	2.11355872589653	3.8692481728103	3.71307540190071	3.66040887464749	1.7769	0.8294	3.941e-17	5.642e-15	Nodiff	7	152134922	152436644	-	53322	KMT2C	GO:0003677;GO:0003713;GO:0003723;GO:0005515;GO:0005634;GO:0005654;GO:0006325;GO:0006355;GO:0008168;GO:0016570;GO:0016571;GO:0016740;GO:0016746;GO:0032259;GO:0035097;GO:0042054;GO:0042393;GO:0042800;GO:0043231;GO:0044666;GO:0045944;GO:0046872;GO:0051568;GO:0097692	K09188	EC:2.1.1.354	D;K	KOG4443;35AW1;38F1W;3B98N;3CXIX;3J69W;481CA;48XK3;4MIMG;4MTIV	lysine methyltransferase 2C [Source:HGNC Symbol;Acc:HGNC:13726]	58508	Q8NEZ4	GO:0006325//chromatin organization;GO:0006355//regulation of transcription, DNA-templated;GO:0016570//histone modification;GO:0016571//histone methylation;GO:0032259//methylation;GO:0045944//positive regulation of transcription by RNA polymerase II;GO:0051568//histone H3-K4 methylation;GO:0097692//histone H3-K4 monomethylation;	GO:0005634//nucleus;GO:0005654//nucleoplasm;GO:0035097//histone methyltransferase complex;GO:0043231//intracellular membrane-bounded organelle;GO:0044666//MLL3/4 complex;	GO:0003677//DNA binding;GO:0003713//transcription coactivator activity;GO:0003723//RNA binding;GO:0005515//protein binding;GO:0008168//methyltransferase activity;GO:0016740//transferase activity;GO:0016746//acyltransferase activity;GO:0042054//histone methyltransferase activity;GO:0042393//histone binding;GO:0042800//histone methyltransferase activity (H3-K4 specific);GO:0046872//metal ion bindin…	ko00310(Lysine degradation)	KMT2C
ENSG00000221963	1328.55	9.65402726992913	9.35263716038378	9.79529485262326	5.30761255504146	5.05034340415782	5.64108395438957	0.5491	-0.865	4.751e-17	6.735e-15	Nodiff	22	35648446	35668404	+	10065	APOL6	GO:0005515;GO:0005576;GO:0005737;GO:0006869;GO:0008289;GO:0016020;GO:0016021;GO:0042157	K14480	-	S;U	2QPNS;35CIJ;3A1BI;3BQ6E;3D1JY;3JF2D;4896G;492TP;4MH02;4MS5T	apolipoprotein L6 [Source:HGNC Symbol;Acc:HGNC:14870]	80830	Q9BWW8;B3KTP4	GO:0006869//lipid transport;GO:0042157//lipoprotein metabolic process;	GO:0005576//extracellular region;GO:0005737//cytoplasm;GO:0016020//membrane;GO:0016021//integral component of membrane;	GO:0005515//protein binding;GO:0008289//lipid binding;	-	APOL6
ENSG00000215915	528.039	3.76183360098084	3.49547957434218	3.44041338640932	11.5260551730586	8.52231765986139	14.6148417431421	3.1885	1.6729	6.137e-17	8.617e-15	Up Regulation	1	1449689	1470163	+	3981	ATAD3C	GO:0000166;GO:0005524;GO:0005739;GO:0007005;GO:0016887	-	-	O	KOG0742;35D42;38FE1;3B9BW;3CSRI;3J6VX;48101;492BE;4MIKJ;4N8BA	ATPase family AAA domain containing 3C [Source:HGNC Symbol;Acc:HGNC:32151]	219293	Q5T2N8	GO:0007005//mitochondrion organization;	GO:0005739//mitochondrion;	GO:0000166//nucleotide binding;GO:0005524//ATP binding;GO:0016887//ATP hydrolysis activity;	-	ATAD3C
ENSG00000167553	2197.33	43.2381099919697	39.1207769743538	38.2393433831151	15.540769771586	12.2116117969641	18.9979356145474	0.3818	-1.389	7.618e-17	1.06e-14	Down Regulation	12	49188736	49274600	+	4454	TUBA1C	GO:0000166;GO:0000226;GO:0000278;GO:0005198;GO:0005200;GO:0005515;GO:0005525;GO:0005634;GO:0005737;GO:0005856;GO:0005874;GO:0005881;GO:0007010;GO:0007017;GO:0015630;GO:0030705;GO:0031982;GO:0045121;GO:0051301	K07374	-	Z	KOG1376;35K6S;38E06;3BAUV;3CRFN;3J54Q;47ZHV;4901E;4MM0N;4N5JQ	tubulin alpha 1c [Source:HGNC Symbol;Acc:HGNC:20768]	84790	Q9BQE3	GO:0000226//microtubule cytoskeleton organization;GO:0000278//mitotic cell cycle;GO:0007010//cytoskeleton organization;GO:0007017//microtubule-based process;GO:0030705//cytoskeleton-dependent intracellular transport;GO:0051301//cell division;	GO:0005634//nucleus;GO:0005737//cytoplasm;GO:0005856//cytoskeleton;GO:0005874//microtubule;GO:0005881//cytoplasmic microtubule;GO:0015630//microtubule cytoskeleton;GO:0031982//vesicle;GO:0045121//membrane raft;	GO:0000166//nucleotide binding;GO:0005198//structural molecule activity;GO:0005200//structural constituent of cytoskeleton;GO:0005515//protein binding;GO:0005525//GTP binding;	ko05132(Salmonella infection);ko05130(Pathogenic Escherichia coli infection);ko05022(Pathways of neurodegeneration - multiple diseases);ko05020(Prion disease);ko05016(Huntington disease);ko05014(Amyotrophic lateral sclerosis);ko05012(Parkinson disease);ko05010(Alzheimer disease);ko04540(Gap junction);ko04530(Tight junction);ko04210(Apoptosis);ko04145(Phagosome)	TUBA1C
ENSG00000181472	598.531	14.6563100392417	13.9460165925029	15.6388517761523	6.80003391012847	7.32100772616667	7.04359935419185	0.4735	-1.079	7.995e-17	1.102e-14	Down Regulation	6	151364115	151391559	-	3103	ZBTB2	GO:0000122;GO:0000978;GO:0001227;GO:0003677;GO:0005515;GO:0005634;GO:0005654;GO:0006357;GO:0042802;GO:0046872;GO:1990837	K10489	-	S;K	35BBN;39RHM;3BEHW;3CVDB;3JA2I;48A37;493PQ;4M881;4MVKU	zinc finger and BTB domain containing 2 [Source:HGNC Symbol;Acc:HGNC:20868]	57621	Q8N680	GO:0000122//negative regulation of transcription by RNA polymerase II;GO:0006357//regulation of transcription by RNA polymerase II;	GO:0005634//nucleus;GO:0005654//nucleoplasm;	GO:0000978//RNA polymerase II cis-regulatory region sequence-specific DNA binding;GO:0001227//DNA-binding transcription repressor activity, RNA polymerase II-specific;GO:0003677//DNA binding;GO:0005515//protein binding;GO:0042802//identical protein binding;GO:0046872//metal ion binding;GO:1990837//sequence-specific double-stranded DNA binding;	-	ZBTB2
ENSG00000105676	448.569	8.44251493398506	8.26908964817193	8.55231101370808	4.03644684601287	3.86445591205576	4.39953532047678	0.4812	-1.055	8.693e-17	1.187e-14	Down Regulation	19	19033575	19060311	+	4052	ARMC6	GO:0002244;GO:0005515;GO:0005829	K24166	-	S;U	KOG4199;35K9J;39241;3BD3P;3CRIE;3J4RU;4834H;4959R;4MCCH;4N1ES	armadillo repeat containing 6 [Source:HGNC Symbol;Acc:HGNC:25049]	93436	Q6NXE6	GO:0002244//hematopoietic progenitor cell differentiation;	GO:0005829//cytosol;	GO:0005515//protein binding;	-	ARMC6
ENSG00000122861	2773.83	99.9691629525352	64.5261778265625	82.0774595337865	21.8629250456289	28.741625285438	20.4124689108821	0.285	-1.811	8.863e-17	1.199e-14	Down Regulation	10	73909177	73917496	+	2949	PLAU	GO:0001666;GO:0004252;GO:0005515;GO:0005576;GO:0005615;GO:0005886;GO:0005925;GO:0006508;GO:0006935;GO:0007165;GO:0007596;GO:0007599;GO:0008233;GO:0008236;GO:0009986;GO:0010469;GO:0010755;GO:0010757;GO:0014909;GO:0014910;GO:0016787;GO:0030155;GO:0030335;GO:0031639;GO:0033628;GO:0035579;GO:0038195;GO:0042127;GO:0042730;GO:0051917;GO:0051918;GO:0061041;GO:0070062;GO:0070821;GO:0097180;GO:0098637;GO:…	K01348	EC:3.4.21.73	O	2QRMI;35IQS;38HFU;3BDFW;3CX7A;3JCDF;484IT;4954C;4MHHF;4N46U	plasminogen activator, urokinase [Source:HGNC Symbol;Acc:HGNC:9052]	5328	P00749;A0A024QZM9;Q59GZ8	GO:0001666//response to hypoxia;GO:0006508//proteolysis;GO:0006935//chemotaxis;GO:0007165//signal transduction;GO:0007596//blood coagulation;GO:0007599//hemostasis;GO:0010469//regulation of signaling receptor activity;GO:0010755//regulation of plasminogen activation;GO:0010757//negative regulation of plasminogen activation;GO:0014909//smooth muscle cell migration;GO:0014910//regulation of smooth …	GO:0005576//extracellular region;GO:0005615//extracellular space;GO:0005886//plasma membrane;GO:0005925//focal adhesion;GO:0009986//cell surface;GO:0035579//specific granule membrane;GO:0070062//extracellular exosome;GO:0070821//tertiary granule membrane;GO:0097180//serine protease inhibitor complex;GO:0098637//protein complex involved in cell-matrix adhesion;GO:1905370//serine-type endopeptidase…	GO:0004252//serine-type endopeptidase activity;GO:0005515//protein binding;GO:0008233//peptidase activity;GO:0008236//serine-type peptidase activity;GO:0016787//hydrolase activity;	ko05215(Prostate cancer);ko05206(MicroRNAs in cancer);ko05205(Proteoglycans in cancer);ko05202(Transcriptional misregulation in cancer);ko04610(Complement and coagulation cascades);ko04064(NF-kappa B signaling pathway)	PLAU
ENSG00000146670	1514.9	33.5878619780713	32.0485145476828	35.1853461891536	8.05626046273674	8.6818849169173	14.1320509301008	0.3017	-1.729	9.217e-17	1.235e-14	Down Regulation	11	65066300	65084164	-	3901	CDCA5	GO:0000278;GO:0000775;GO:0000785;GO:0003682;GO:0005515;GO:0005634;GO:0005654;GO:0005694;GO:0005737;GO:0005829;GO:0006302;GO:0007049;GO:0007064;GO:0007076;GO:0007080;GO:0031536;GO:0044877;GO:0051301;GO:0071922	K17390	-	S;L	2S4XG;35GBS;3A3GI;3BRZX;3D39R;3JDEA;483MP;48UVB;4MH1Q;4MZ8R	cell division cycle associated 5 [Source:HGNC Symbol;Acc:HGNC:14626]	113130	Q96FF9;A0A024R5D6	GO:0000278//mitotic cell cycle;GO:0006302//double-strand break repair;GO:0007049//cell cycle;GO:0007064//mitotic sister chromatid cohesion;GO:0007076//mitotic chromosome condensation;GO:0007080//mitotic metaphase plate congression;GO:0031536//positive regulation of exit from mitosis;GO:0051301//cell division;GO:0071922//regulation of cohesin loading;	GO:0000775//chromosome, centromeric region;GO:0000785//chromatin;GO:0005634//nucleus;GO:0005654//nucleoplasm;GO:0005694//chromosome;GO:0005737//cytoplasm;GO:0005829//cytosol;	GO:0003682//chromatin binding;GO:0005515//protein binding;GO:0044877//protein-containing complex binding;	ko05206(MicroRNAs in cancer)	CDCA5
ENSG00000049541	723.252	27.5237817783812	25.4218556256506	29.3176002609259	9.59391592397426	7.1626937967849	11.9561828348011	0.3437	-1.541	9.542e-17	1.267e-14	Down Regulation	7	74231499	74254458	-	2211	RFC2	GO:0000166;GO:0003677;GO:0003689;GO:0005515;GO:0005524;GO:0005634;GO:0005654;GO:0005663;GO:0006260;GO:0006261;GO:0006281;GO:0016887;GO:0017116;GO:0019899;GO:0031390;GO:0032508;GO:1900264	K10755	-	L	KOG0991;35DHF;38G2T;3BDV4;3CR6N;3J8SB;487RQ;48Y4R;4MGMW;4MTHE	replication factor C subunit 2 [Source:HGNC Symbol;Acc:HGNC:9970]	5982	P35250	GO:0006260//DNA replication;GO:0006261//DNA-dependent DNA replication;GO:0006281//DNA repair;GO:0032508//DNA duplex unwinding;GO:1900264//positive regulation of DNA-directed DNA polymerase activity;	GO:0005634//nucleus;GO:0005654//nucleoplasm;GO:0005663//DNA replication factor C complex;GO:0031390//Ctf18 RFC-like complex;	GO:0000166//nucleotide binding;GO:0003677//DNA binding;GO:0003689//DNA clamp loader activity;GO:0005515//protein binding;GO:0005524//ATP binding;GO:0016887//ATP hydrolysis activity;GO:0017116//single-stranded DNA helicase activity;GO:0019899//enzyme binding;	ko03430(Mismatch repair);ko03420(Nucleotide excision repair);ko03030(DNA replication)	RFC2
ENSG00000111252	1460.76	18.0880058488902	18.3400069592589	18.4648238694786	10.837595613679	10.0709344980545	11.1040874875349	0.5767	-0.7941	9.626e-17	1.267e-14	Nodiff	12	111405923	111451623	+	5707	SH2B3	GO:0001780;GO:0005068;GO:0005173;GO:0005515;GO:0005829;GO:0005886;GO:0007165;GO:0007169;GO:0008285;GO:0030097;GO:0030159;GO:0035162;GO:0035556;GO:0035591;GO:0035702;GO:0035855;GO:0036016;GO:0038163;GO:0042532;GO:0043407;GO:0046426;GO:0048821;GO:0051898;GO:0060218;GO:0060761;GO:0070100;GO:0090331;GO:1900235;GO:1990782;GO:1990869	K12459	-	S;T	2QS89;35CYN;39RXF;3BE4A;3D0WT;3JCPS;48AM5;491ZV;4MHCS;4MXE2	SH2B adaptor protein 3 [Source:HGNC Symbol;Acc:HGNC:29605]	10019	Q9UQQ2;Q59H48	GO:0001780//neutrophil homeostasis;GO:0007165//signal transduction;GO:0007169//transmembrane receptor protein tyrosine kinase signaling pathway;GO:0008285//negative regulation of cell population proliferation;GO:0030097//hemopoiesis;GO:0035162//embryonic hemopoiesis;GO:0035556//intracellular signal transduction;GO:0035702//monocyte homeostasis;GO:0035855//megakaryocyte development;GO:0036016//cel…	GO:0005829//cytosol;GO:0005886//plasma membrane;	GO:0005068//transmembrane receptor protein tyrosine kinase adaptor activity;GO:0005173//stem cell factor receptor binding;GO:0005515//protein binding;GO:0030159//signaling receptor complex adaptor activity;GO:0035591//signaling adaptor activity;GO:1990782//protein tyrosine kinase binding;	ko04722(Neurotrophin signaling pathway)	SH2B3
ENSG00000134690	1419.2	54.2707694076832	49.0591096656102	51.6746525673395	12.7837135313655	11.2168171534874	20.9847249129729	0.2855	-1.809	1.04e-16	1.357e-14	Down Regulation	1	37692481	37709719	+	2406	CDCA8	GO:0000070;GO:0000278;GO:0000281;GO:0000775;GO:0001934;GO:0005515;GO:0005634;GO:0005654;GO:0005694;GO:0005730;GO:0005737;GO:0005819;GO:0005829;GO:0005856;GO:0006468;GO:0007049;GO:0007052;GO:0007080;GO:0010369;GO:0015630;GO:0030496;GO:0032133;GO:0032991;GO:0045171;GO:0051233;GO:0051256;GO:0051276;GO:0051301;GO:0090267;GO:1901970;GO:1902425;GO:1903490	K11514	-	S	2QS4S;35P2M;39WTT;3BN0J;3CWBX;3J65B;48BMA;492KH;4MBU7;4N38Q	cell division cycle associated 8 [Source:HGNC Symbol;Acc:HGNC:14629]	55143	Q53HL2	GO:0000070//mitotic sister chromatid segregation;GO:0000278//mitotic cell cycle;GO:0000281//mitotic cytokinesis;GO:0001934//positive regulation of protein phosphorylation;GO:0006468//protein phosphorylation;GO:0007049//cell cycle;GO:0007052//mitotic spindle organization;GO:0007080//mitotic metaphase plate congression;GO:0051256//mitotic spindle midzone assembly;GO:0051276//chromosome organization…	GO:0000775//chromosome, centromeric region;GO:0005634//nucleus;GO:0005654//nucleoplasm;GO:0005694//chromosome;GO:0005730//nucleolus;GO:0005737//cytoplasm;GO:0005819//spindle;GO:0005829//cytosol;GO:0005856//cytoskeleton;GO:0010369//chromocenter;GO:0015630//microtubule cytoskeleton;GO:0030496//midbody;GO:0032133//chromosome passenger complex;GO:0032991//protein-containing complex;GO:0045171//interc…	GO:0005515//protein binding;	-	CDCA8
ENSG00000244754	2321.43	4.03992518374027	4.0846105374721	4.2304899462366	8.92526442924634	8.77474422169107	7.55217224485629	2.0252	1.0181	1.07e-16	1.384e-14	Up Regulation	13	32432417	32538885	-	21002	N4BP2L2	GO:0000122;GO:0001701;GO:0001824;GO:0003674;GO:0003714;GO:0005515;GO:0005634;GO:0016020;GO:0016021;GO:0017053;GO:0019899;GO:0070062;GO:1902035;GO:1902037	-	-	O;L	KOG2401;35UMR;39V2Q;3CQK7;3E6TA;3JNWC;48SEE;49NXM;4MIK1;4MVTQ	NEDD4 binding protein 2 like 2 [Source:HGNC Symbol;Acc:HGNC:26916]	10443	Q92802;A0A024RDV2	GO:0000122//negative regulation of transcription by RNA polymerase II;GO:0001701//in utero embryonic development;GO:0001824//blastocyst development;GO:1902035//positive regulation of hematopoietic stem cell proliferation;GO:1902037//negative regulation of hematopoietic stem cell differentiation;	GO:0005634//nucleus;GO:0016020//membrane;GO:0016021//integral component of membrane;GO:0017053//transcription repressor complex;GO:0070062//extracellular exosome;	GO:0003674//molecular_function;GO:0003714//transcription corepressor activity;GO:0005515//protein binding;GO:0019899//enzyme binding;	-	N4BP2L2
ENSG00000111615	2032.86	16.9129860190327	13.6794648668462	14.2604181658567	6.4874831621985	5.55771264677792	7.21456027250239	0.4231	-1.241	1.273e-16	1.632e-14	Down Regulation	12	75490863	75511636	-	10747	KRR1	GO:0003676;GO:0003723;GO:0005515;GO:0005634;GO:0005654;GO:0005694;GO:0005730;GO:0005737;GO:0006364;GO:0016020;GO:0032040;GO:0042254;GO:0045171;GO:1990904	K06961	-	A;J;D	KOG2874;35B7Y;38C7I;3BECW;3CRZJ;3JAMG;488WY;496US;4MEHP;4N4JK	KRR1 small subunit processome component homolog [Source:HGNC Symbol;Acc:HGNC:5176]	11103	Q13601	GO:0006364//rRNA processing;GO:0042254//ribosome biogenesis;	GO:0005634//nucleus;GO:0005654//nucleoplasm;GO:0005694//chromosome;GO:0005730//nucleolus;GO:0005737//cytoplasm;GO:0016020//membrane;GO:0032040//small-subunit processome;GO:0045171//intercellular bridge;GO:1990904//ribonucleoprotein complex;	GO:0003676//nucleic acid binding;GO:0003723//RNA binding;GO:0005515//protein binding;	-	KRR1
ENSG00000144136	2050.85	28.2756591469899	26.2968123985983	28.1798002179709	13.6886005640436	14.6853119422543	15.5156228085598	0.5244	-0.9313	1.401e-16	1.781e-14	Nodiff	2	112645939	112663825	+	5493	SLC20A1	GO:0005315;GO:0005316;GO:0005436;GO:0005886;GO:0005887;GO:0006796;GO:0006811;GO:0006814;GO:0006817;GO:0015293;GO:0016020;GO:0016021;GO:0031214;GO:0035435;GO:0035725;GO:0038023;GO:0043123;GO:0055085;GO:0110165	K14640	-	P;U	KOG2493;35A29;38HXZ;3BAM9;3CRGE;3JPK6;4822U;493JM;4MCAG;4N54R	solute carrier family 20 member 1 [Source:HGNC Symbol;Acc:HGNC:10946]	6574	Q8WUM9;A7LNJ1	GO:0006796//phosphate-containing compound metabolic process;GO:0006811//ion transport;GO:0006814//sodium ion transport;GO:0006817//phosphate ion transport;GO:0031214//biomineral tissue development;GO:0035435//phosphate ion transmembrane transport;GO:0035725//sodium ion transmembrane transport;GO:0043123//positive regulation of I-kappaB kinase/NF-kappaB signaling;GO:0055085//transmembrane transpor…	GO:0005886//plasma membrane;GO:0005887//integral component of plasma membrane;GO:0016020//membrane;GO:0016021//integral component of membrane;GO:0110165//cellular anatomical entity;	GO:0005315//inorganic phosphate transmembrane transporter activity;GO:0005316//high-affinity inorganic phosphate:sodium symporter activity;GO:0005436//sodium:phosphate symporter activity;GO:0015293//symporter activity;GO:0038023//signaling receptor activity;	-	SLC20A1
ENSG00000051180	271.803	7.60067310040843	7.11328893282649	8.28874	2.20824123589039	1.6732419721799	3.00900294274351	0.2949	-1.762	1.522e-16	1.917e-14	Down Regulation	15	40694774	40732340	+	3084	RAD51	GO:0000150;GO:0000152;GO:0000166;GO:0000228;GO:0000722;GO:0000724;GO:0000730;GO:0000781;GO:0000785;GO:0000793;GO:0000794;GO:0000800;GO:0001673;GO:0001932;GO:0003676;GO:0003677;GO:0003682;GO:0003690;GO:0003697;GO:0005515;GO:0005524;GO:0005634;GO:0005654;GO:0005694;GO:0005737;GO:0005739;GO:0005759;GO:0005815;GO:0005856;GO:0006259;GO:0006268;GO:0006281;GO:0006310;GO:0006312;GO:0006974;GO:0007127;GO:…	K04482	-	L	KOG1433;35I5C;38CS4;3BA4U;3CU4D;3JCJ9;48505;48V0W;4MGQ3;4N1MF	RAD51 recombinase [Source:HGNC Symbol;Acc:HGNC:9817]	5888	Q06609	GO:0000722//telomere maintenance via recombination;GO:0000724//double-strand break repair via homologous recombination;GO:0000730//DNA recombinase assembly;GO:0001932//regulation of protein phosphorylation;GO:0006259//DNA metabolic process;GO:0006268//DNA unwinding involved in DNA replication;GO:0006281//DNA repair;GO:0006310//DNA recombination;GO:0006312//mitotic recombination;GO:0006974//cellul…	GO:0000152//nuclear ubiquitin ligase complex;GO:0000228//nuclear chromosome;GO:0000781//chromosome, telomeric region;GO:0000785//chromatin;GO:0000793//condensed chromosome;GO:0000794//condensed nuclear chromosome;GO:0000800//lateral element;GO:0001673//male germ cell nucleus;GO:0005634//nucleus;GO:0005654//nucleoplasm;GO:0005694//chromosome;GO:0005737//cytoplasm;GO:0005739//mitochondrion;GO:00057…	GO:0000150//DNA strand exchange activity;GO:0000166//nucleotide binding;GO:0003676//nucleic acid binding;GO:0003677//DNA binding;GO:0003682//chromatin binding;GO:0003690//double-stranded DNA binding;GO:0003697//single-stranded DNA binding;GO:0005515//protein binding;GO:0005524//ATP binding;GO:0008022//protein C-terminus binding;GO:0008094//ATP-dependent activity, acting on DNA;GO:0017116//single-…	ko05212(Pancreatic cancer);ko05200(Pathways in cancer);ko03460(Fanconi anemia pathway);ko03440(Homologous recombination)	RAD51
ENSG00000183207	1350.57	32.2845777543087	26.5512032814276	32.619280197704	12.046428519001	11.3554106704463	14.8002632781834	0.4119	-1.28	1.639e-16	2.047e-14	Down Regulation	19	48993562	49015970	+	3531	RUVBL2	GO:0000166;GO:0000492;GO:0000723;GO:0000786;GO:0000791;GO:0000812;GO:0000978;GO:0000979;GO:0001094;GO:0003678;GO:0003714;GO:0004386;GO:0005515;GO:0005524;GO:0005634;GO:0005654;GO:0005737;GO:0005813;GO:0005829;GO:0006275;GO:0006281;GO:0006282;GO:0006310;GO:0006325;GO:0006338;GO:0006355;GO:0006357;GO:0006457;GO:0006974;GO:0008013;GO:0008094;GO:0016020;GO:0016363;GO:0016573;GO:0016787;GO:0016887;GO:…	K11338	EC:5.6.2.3	K;L	KOG2680;35MI1;38DYY;3BCRH;3CVB4;3J3BT;48618;48W5C;4MA4F;4N30V	RuvB like AAA ATPase 2 [Source:HGNC Symbol;Acc:HGNC:10475]	10856	Q9Y230	GO:0000492//box C/D snoRNP assembly;GO:0000723//telomere maintenance;GO:0006275//regulation of DNA replication;GO:0006281//DNA repair;GO:0006282//regulation of DNA repair;GO:0006310//DNA recombination;GO:0006325//chromatin organization;GO:0006338//chromatin remodeling;GO:0006355//regulation of transcription, DNA-templated;GO:0006357//regulation of transcription by RNA polymerase II;GO:0006457//pr…	GO:0000786//nucleosome;GO:0000791//euchromatin;GO:0000812//Swr1 complex;GO:0005634//nucleus;GO:0005654//nucleoplasm;GO:0005737//cytoplasm;GO:0005813//centrosome;GO:0005829//cytosol;GO:0016020//membrane;GO:0016363//nuclear matrix;GO:0031011//Ino80 complex;GO:0035267//NuA4 histone acetyltransferase complex;GO:0070062//extracellular exosome;GO:0071339//MLL1 complex;GO:0097255//R2TP complex;GO:010103…	GO:0000166//nucleotide binding;GO:0000978//RNA polymerase II cis-regulatory region sequence-specific DNA binding;GO:0000979//RNA polymerase II core promoter sequence-specific DNA binding;GO:0001094//TFIID-class transcription factor complex binding;GO:0003678//DNA helicase activity;GO:0003714//transcription corepressor activity;GO:0004386//helicase activity;GO:0005515//protein binding;GO:0005524//…	-	RUVBL2
ENSG00000113441	5842.64	15.6122852541747	16.4885924243011	15.8969616578961	30.5999674837122	27.2035386373713	27.1193117651759	1.7512	0.8083	1.895e-16	2.347e-14	Nodiff	5	96935394	97037513	+	14966	LNPEP	GO:0000209;GO:0002480;GO:0004177;GO:0005515;GO:0005576;GO:0005737;GO:0005765;GO:0005829;GO:0005886;GO:0005887;GO:0006508;GO:0007165;GO:0007267;GO:0007565;GO:0008217;GO:0008233;GO:0008237;GO:0008270;GO:0016020;GO:0016021;GO:0016787;GO:0030163;GO:0030659;GO:0031905;GO:0042277;GO:0043171;GO:0046872;GO:0048471;GO:0060395;GO:0070006;GO:0120163	K01257	EC:3.4.11.3	O;E	KOG1046;35HQB;38CFG;3BD0T;3CUKR;3J5KE;484SG;494ZW;4MI1M;4N1ZY	leucyl and cystinyl aminopeptidase [Source:HGNC Symbol;Acc:HGNC:6656]	4012	Q9UIQ6	GO:0000209//protein polyubiquitination;GO:0002480//antigen processing and presentation of exogenous peptide antigen via MHC class I, TAP-independent;GO:0006508//proteolysis;GO:0007165//signal transduction;GO:0007267//cell-cell signaling;GO:0007565//female pregnancy;GO:0008217//regulation of blood pressure;GO:0030163//protein catabolic process;GO:0043171//peptide catabolic process;GO:0060395//SMAD…	GO:0005576//extracellular region;GO:0005737//cytoplasm;GO:0005765//lysosomal membrane;GO:0005829//cytosol;GO:0005886//plasma membrane;GO:0005887//integral component of plasma membrane;GO:0016020//membrane;GO:0016021//integral component of membrane;GO:0030659//cytoplasmic vesicle membrane;GO:0031905//early endosome lumen;GO:0048471//perinuclear region of cytoplasm;	GO:0004177//aminopeptidase activity;GO:0005515//protein binding;GO:0008233//peptidase activity;GO:0008237//metallopeptidase activity;GO:0008270//zinc ion binding;GO:0016787//hydrolase activity;GO:0042277//peptide binding;GO:0046872//metal ion binding;GO:0070006//metalloaminopeptidase activity;	ko04614(Renin-angiotensin system)	LNPEP
ENSG00000143476	902.151	16.6242777774617	15.5076733503429	15.6133454948157	4.24075146324837	3.54218599351304	6.62223845947968	0.2968	-1.752	2.027e-16	2.49e-14	Down Regulation	1	212035553	212107400	+	4923	DTL	GO:0000209;GO:0004842;GO:0005515;GO:0005634;GO:0005654;GO:0005694;GO:0005730;GO:0005737;GO:0005813;GO:0005815;GO:0005829;GO:0005856;GO:0006260;GO:0006511;GO:0006513;GO:0006974;GO:0007095;GO:0009411;GO:0010971;GO:0016020;GO:0016567;GO:0019985;GO:0030674;GO:0031464;GO:0031465;GO:0031965;GO:0043161;GO:0045732;GO:0048511;GO:0051726;GO:0080008	K11790	-	S	KOG0321;35DC0;38BTD;3BG6F;3CTNC;3J3PA;48513;494QP;4M6NN;4MWGR	denticleless E3 ubiquitin protein ligase homolog [Source:HGNC Symbol;Acc:HGNC:30288]	51514	Q9NZJ0	GO:0000209//protein polyubiquitination;GO:0006260//DNA replication;GO:0006511//ubiquitin-dependent protein catabolic process;GO:0006513//protein monoubiquitination;GO:0006974//cellular response to DNA damage stimulus;GO:0007095//mitotic G2 DNA damage checkpoint signaling;GO:0009411//response to UV;GO:0010971//positive regulation of G2/M transition of mitotic cell cycle;GO:0016567//protein ubiquit…	GO:0005634//nucleus;GO:0005654//nucleoplasm;GO:0005694//chromosome;GO:0005730//nucleolus;GO:0005737//cytoplasm;GO:0005813//centrosome;GO:0005815//microtubule organizing center;GO:0005829//cytosol;GO:0005856//cytoskeleton;GO:0016020//membrane;GO:0031464//Cul4A-RING E3 ubiquitin ligase complex;GO:0031465//Cul4B-RING E3 ubiquitin ligase complex;GO:0031965//nuclear membrane;GO:0080008//Cul4-RING E3 u…	GO:0004842//ubiquitin-protein transferase activity;GO:0005515//protein binding;GO:0030674//protein-macromolecule adaptor activity;	-	DTL
ENSG00000100162	153.13	7.26969580437306	7.92053347474708	7.48910202824533	2.29665362972829	1.79635301699014	2.93045212908031	0.3055	-1.711	2.663e-16	3.245e-14	Down Regulation	22	41938737	41947152	-	1750	CENPM	GO:0000775;GO:0000776;GO:0005634;GO:0005654;GO:0005694;GO:0005737;GO:0005829	K11505	-	S	2S17M;35PAJ;39Y8V;3BKPU;3D3YP;3J5NP;48AX4;49113;4MAAD;4N64E	centromere protein M [Source:HGNC Symbol;Acc:HGNC:18352]	79019	Q9NSP4;A0A024R1Q3	-	GO:0000775//chromosome, centromeric region;GO:0000776//kinetochore;GO:0005634//nucleus;GO:0005654//nucleoplasm;GO:0005694//chromosome;GO:0005737//cytoplasm;GO:0005829//cytosol;	-	-	CENPM
ENSG00000070950	511.313	7.04968736610157	5.32110277289025	5.95936118292757	1.92625538599717	1.94484555414749	2.58750307311883	0.3469	-1.527	2.817e-16	3.404e-14	Down Regulation	3	8775402	8963773	-	6984	RAD18	GO:0000403;GO:0003677;GO:0003684;GO:0003697;GO:0005515;GO:0005634;GO:0005654;GO:0005657;GO:0005737;GO:0005813;GO:0005815;GO:0005856;GO:0006281;GO:0006301;GO:0006513;GO:0006974;GO:0016567;GO:0016604;GO:0016740;GO:0031593;GO:0031625;GO:0035861;GO:0042405;GO:0042802;GO:0044877;GO:0046872;GO:0051865;GO:0051984;GO:0060548;GO:0061630;GO:0097505;GO:0140678	K10627	EC:2.3.2.27	T;L	KOG0287;35D0J;38DW0;3BA4P;3CWPX;3JBBJ;488VP;493MI;4MDUM;4N2GJ	RAD18 E3 ubiquitin protein ligase [Source:HGNC Symbol;Acc:HGNC:18278]	56852	Q9NS91	GO:0006281//DNA repair;GO:0006301//postreplication repair;GO:0006513//protein monoubiquitination;GO:0006974//cellular response to DNA damage stimulus;GO:0016567//protein ubiquitination;GO:0051865//protein autoubiquitination;GO:0051984//positive regulation of chromosome segregation;GO:0060548//negative regulation of cell death;	GO:0005634//nucleus;GO:0005654//nucleoplasm;GO:0005657//replication fork;GO:0005737//cytoplasm;GO:0005813//centrosome;GO:0005815//microtubule organizing center;GO:0005856//cytoskeleton;GO:0016604//nuclear body;GO:0035861//site of double-strand break;GO:0042405//nuclear inclusion body;GO:0097505//Rad6-Rad18 complex;	GO:0000403//Y-form DNA binding;GO:0003677//DNA binding;GO:0003684//damaged DNA binding;GO:0003697//single-stranded DNA binding;GO:0005515//protein binding;GO:0016740//transferase activity;GO:0031593//polyubiquitin modification-dependent protein binding;GO:0031625//ubiquitin protein ligase binding;GO:0042802//identical protein binding;GO:0044877//protein-containing complex binding;GO:0046872//meta…	-	RAD18
ENSG00000156504	4473.32	74.9363900536687	80.9637444994488	77.2933533151778	36.4157593061434	31.5423064801043	43.8891322314386	0.4736	-1.078	2.85e-16	3.416e-14	Down Regulation	X	134769566	134797232	-	4404	PABIR2	GO:0004865;GO:0005581;GO:0043086	-	-	S	2QTCH;35A21;38E8X;3BAWS;3CZS7;3J1I1;47ZHR;48ZQZ;4MF5C;4N4E6	PABIR family member 2 [Source:HGNC Symbol;Acc:HGNC:30490]	159090	Q7Z309	GO:0043086//negative regulation of catalytic activity;	GO:0005581//collagen trimer;	GO:0004865//protein serine/threonine phosphatase inhibitor activity;	-	PABIR2
ENSG00000164251	2610.25	79.1640001915971	67.0678318568265	73.7039735476624	25.5864154022986	32.7135445427788	23.2119146174308	0.3675	-1.444	2.975e-16	3.538e-14	Down Regulation	5	76818933	76835315	+	2930	F2RL1	GO:0001965;GO:0002020;GO:0002286;GO:0002376;GO:0002690;GO:0002720;GO:0003104;GO:0004930;GO:0005102;GO:0005515;GO:0005769;GO:0005794;GO:0005886;GO:0005887;GO:0006954;GO:0007165;GO:0007186;GO:0007204;GO:0007596;GO:0010804;GO:0014068;GO:0015057;GO:0016020;GO:0016021;GO:0030193;GO:0030335;GO:0030836;GO:0031143;GO:0031274;GO:0031681;GO:0032682;GO:0032722;GO:0032729;GO:0032731;GO:0032733;GO:0032755;GO:…	K04234	-	S;T	2QR8S;35EI0;39UEN;3BJ4X;3CV2B;3JAGI;482RU;494CD;4MDQ2;4MY92	F2R like trypsin receptor 1 [Source:HGNC Symbol;Acc:HGNC:3538]	2150	P55085	GO:0002286//T cell activation involved in immune response;GO:0002376//immune system process;GO:0002690//positive regulation of leukocyte chemotaxis;GO:0002720//positive regulation of cytokine production involved in immune response;GO:0003104//positive regulation of glomerular filtration;GO:0006954//inflammatory response;GO:0007165//signal transduction;GO:0007186//G protein-coupled receptor signal…	GO:0005769//early endosome;GO:0005794//Golgi apparatus;GO:0005886//plasma membrane;GO:0005887//integral component of plasma membrane;GO:0016020//membrane;GO:0016021//integral component of membrane;GO:0031143//pseudopodium;	GO:0001965//G-protein alpha-subunit binding;GO:0002020//protease binding;GO:0004930//G protein-coupled receptor activity;GO:0005102//signaling receptor binding;GO:0005515//protein binding;GO:0015057//thrombin-activated receptor activity;GO:0031681//G-protein beta-subunit binding;GO:0038023//signaling receptor activity;	ko05143(African trypanosomiasis);ko04750(Inflammatory mediator regulation of TRP channels);ko04080(Neuroactive ligand-receptor interaction)	F2RL1
ENSG00000026025	17043.8	263.10888276873	227.718409932471	240.625282495188	125.598245375766	130.843	128.341744012924	0.5201	-0.9431	3.251e-16	3.835e-14	Nodiff	10	17228241	17237593	+	5176	VIM	GO:0003723;GO:0003725;GO:0005200;GO:0005212;GO:0005515;GO:0005634;GO:0005737;GO:0005777;GO:0005815;GO:0005829;GO:0005844;GO:0005856;GO:0005882;GO:0005886;GO:0005925;GO:0010628;GO:0010977;GO:0014002;GO:0016020;GO:0016363;GO:0019904;GO:0030424;GO:0031175;GO:0031252;GO:0032967;GO:0042802;GO:0042995;GO:0043005;GO:0043488;GO:0045103;GO:0045109;GO:0045111;GO:0045335;GO:0045727;GO:0060020;GO:0060090;GO:…	K07606	-	S;Z	KOG0977;35HYI;39RT4;3BFG1;3D1BS;3J270;47YVK;493J8;4MA94;4N7TD	vimentin [Source:HGNC Symbol;Acc:HGNC:12692]	7431	P08670;V9HWE1	GO:0010628//positive regulation of gene expression;GO:0010977//negative regulation of neuron projection development;GO:0014002//astrocyte development;GO:0031175//neuron projection development;GO:0032967//positive regulation of collagen biosynthetic process;GO:0043488//regulation of mRNA stability;GO:0045103//intermediate filament-based process;GO:0045109//intermediate filament organization;GO:004…	GO:0005634//nucleus;GO:0005737//cytoplasm;GO:0005777//peroxisome;GO:0005815//microtubule organizing center;GO:0005829//cytosol;GO:0005844//polysome;GO:0005856//cytoskeleton;GO:0005882//intermediate filament;GO:0005886//plasma membrane;GO:0005925//focal adhesion;GO:0016020//membrane;GO:0016363//nuclear matrix;GO:0030424//axon;GO:0031252//cell leading edge;GO:0042995//cell projection;GO:0043005//ne…	GO:0003723//RNA binding;GO:0003725//double-stranded RNA binding;GO:0005200//structural constituent of cytoskeleton;GO:0005212//structural constituent of eye lens;GO:0005515//protein binding;GO:0019904//protein domain specific binding;GO:0042802//identical protein binding;GO:0060090//molecular adaptor activity;GO:0097110//scaffold protein binding;GO:1990254//keratin filament binding;	ko05206(MicroRNAs in cancer);ko05169(Epstein-Barr virus infection)	VIM
ENSG00000119917	402.309	7.17639420696212	6.26802682171492	6.71098704785718	2.22536636325721	1.68564243023305	2.85555701348609	0.3304	-1.598	3.485e-16	4.078e-14	Down Regulation	10	89327307	89377473	+	5067	IFIT3	GO:0002376;GO:0003674;GO:0003723;GO:0005515;GO:0005737;GO:0005739;GO:0005829;GO:0008285;GO:0009615;GO:0035457;GO:0042802;GO:0043066;GO:0045087;GO:0051607	K24849	-	S;O;T	KOG1124;35GB3;39VM4;3BNX8;3D16V;3J87T;485HI;496TB;4M876;4N2WP	interferon induced protein with tetratricopeptide repeats 3 [Source:HGNC Symbol;Acc:HGNC:5411]	3437	O14879;Q5T765	GO:0002376//immune system process;GO:0008285//negative regulation of cell population proliferation;GO:0009615//response to virus;GO:0035457//cellular response to interferon-alpha;GO:0043066//negative regulation of apoptotic process;GO:0045087//innate immune response;GO:0051607//defense response to virus;	GO:0005737//cytoplasm;GO:0005739//mitochondrion;GO:0005829//cytosol;	GO:0003674//molecular_function;GO:0003723//RNA binding;GO:0005515//protein binding;GO:0042802//identical protein binding;	-	IFIT3
ENSG00000134308	17847.5	541.920581801501	454.101780854316	494.689122245738	245.750748408117	232.335166636903	271.734970811763	0.4964	-1.011	3.693e-16	4.287e-14	Down Regulation	2	9583967	9630997	-	2701	YWHAQ	GO:0005515;GO:0005737;GO:0005829;GO:0005925;GO:0006605;GO:0007165;GO:0007264;GO:0008104;GO:0016020;GO:0019904;GO:0021762;GO:0032991;GO:0042802;GO:0045892;GO:0047485;GO:0070062	K16197	-	O;T;K	KOG0841;35UAI;38CKG;3BCFK;3E478;3JPVV;48QVV;49MFU;4MRTM;4N9NG	tyrosine 3-monooxygenase/tryptophan 5-monooxygenase activation protein theta [Source:HGNC Symbol;Acc:HGNC:12854]	10971	P27348	GO:0006605//protein targeting;GO:0007165//signal transduction;GO:0007264//small GTPase mediated signal transduction;GO:0008104//protein localization;GO:0021762//substantia nigra development;GO:0045892//negative regulation of transcription, DNA-templated;	GO:0005737//cytoplasm;GO:0005829//cytosol;GO:0005925//focal adhesion;GO:0016020//membrane;GO:0032991//protein-containing complex;GO:0070062//extracellular exosome;	GO:0005515//protein binding;GO:0019904//protein domain specific binding;GO:0042802//identical protein binding;GO:0047485//protein N-terminus binding;	ko05203(Viral carcinogenesis);ko05161(Hepatitis B);ko05160(Hepatitis C);ko04390(Hippo signaling pathway);ko04151(PI3K-Akt signaling pathway);ko04114(Oocyte meiosis);ko04110(Cell cycle)	YWHAQ
ENSG00000149527	796.437	8.60028860923119	5.68475352341593	7.14938938572336	1.17230709800676	0.559717030938126	1.73963682995023	0.1583	-2.659	3.821e-16	4.401e-14	Down Regulation	1	2425980	2505532	+	10809	PLCH2	GO:0004435;GO:0004629;GO:0005509;GO:0005575;GO:0005737;GO:0005886;GO:0006629;GO:0007165;GO:0008081;GO:0016020;GO:0016042;GO:0016787;GO:0035556;GO:0046488;GO:0046872;GO:0048015	K19006	EC:3.1.4.11	S;I	KOG0169;35BJ1;38BAR;3BDE8;3CSQY;3JBF2;4821N;492GQ;4M92A;4MUKP	phospholipase C eta 2 [Source:HGNC Symbol;Acc:HGNC:29037]	9651	O75038	GO:0006629//lipid metabolic process;GO:0007165//signal transduction;GO:0016042//lipid catabolic process;GO:0035556//intracellular signal transduction;GO:0046488//phosphatidylinositol metabolic process;GO:0048015//phosphatidylinositol-mediated signaling;	GO:0005575//cellular_component;GO:0005737//cytoplasm;GO:0005886//plasma membrane;GO:0016020//membrane;	GO:0004435//phosphatidylinositol phospholipase C activity;GO:0004629//phospholipase C activity;GO:0005509//calcium ion binding;GO:0008081//phosphoric diester hydrolase activity;GO:0016787//hydrolase activity;GO:0046872//metal ion binding;	ko00562(Inositol phosphate metabolism)	PLCH2
ENSG00000163762	1310.46	26.9457712085523	25.112247491609	24.9855076796247	8.75052677343207	5.69039728707346	10.5511746098112	0.3191	-1.648	3.96e-16	4.526e-14	Down Regulation	3	149318498	149334414	-	4357	TM4SF18	GO:0005515;GO:0016020;GO:0016021	K24921	-	S	2QS18;35F3U;38F6J;3BIPN;3CV6T;3JE7J;4851R;490V5;4MBS8;4N4EJ	transmembrane 4 L six family member 18 [Source:HGNC Symbol;Acc:HGNC:25181]	116441	Q96CE8	-	GO:0016020//membrane;GO:0016021//integral component of membrane;	GO:0005515//protein binding;	-	TM4SF18
ENSG00000171848	5288.71	54.2617287792934	49.2047634837695	50.4896286084181	12.4779494295163	9.49353660168845	19.9901786091393	0.2678	-1.901	4.201e-16	4.764e-14	Down Regulation	2	10120698	10211725	+	9153	RRM2	GO:0001824;GO:0004748;GO:0005515;GO:0005634;GO:0005737;GO:0005829;GO:0005971;GO:0006260;GO:0008199;GO:0009185;GO:0009262;GO:0009263;GO:0009265;GO:0016491;GO:0042802;GO:0042803;GO:0046872;GO:0051290;GO:0055086;GO:1900087	K10808	EC:1.17.4.1	F;K	KOG1567;35JRQ;38B80;3B9U0;3CT3A;3JCGW;484EH;48X4B;4MCZT;4N5BE	ribonucleotide reductase regulatory subunit M2 [Source:HGNC Symbol;Acc:HGNC:10452]	6241	P31350	GO:0001824//blastocyst development;GO:0006260//DNA replication;GO:0009185//ribonucleoside diphosphate metabolic process;GO:0009262//deoxyribonucleotide metabolic process;GO:0009263//deoxyribonucleotide biosynthetic process;GO:0009265//2'-deoxyribonucleotide biosynthetic process;GO:0051290//protein heterotetramerization;GO:0055086//nucleobase-containing small molecule metabolic process;GO:1900087/…	GO:0005634//nucleus;GO:0005737//cytoplasm;GO:0005829//cytosol;GO:0005971//ribonucleoside-diphosphate reductase complex;	GO:0004748//ribonucleoside-diphosphate reductase activity, thioredoxin disulfide as acceptor;GO:0005515//protein binding;GO:0008199//ferric iron binding;GO:0016491//oxidoreductase activity;GO:0042802//identical protein binding;GO:0042803//protein homodimerization activity;GO:0046872//metal ion binding;	ko04115(p53 signaling pathway);ko00983(Drug metabolism - other enzymes);ko00480(Glutathione metabolism);ko00240(Pyrimidine metabolism);ko00230(Purine metabolism)	RRM2
ENSG00000166851	999.702	20.6238475228277	17.8730194637718	17.7727265608035	3.7409748155807	3.9625434198312	7.18248070853017	0.2602	-1.943	4.911e-16	5.527e-14	Down Regulation	16	23677656	23690367	+	4760	PLK1	GO:0000070;GO:0000086;GO:0000122;GO:0000132;GO:0000166;GO:0000278;GO:0000281;GO:0000287;GO:0000775;GO:0000776;GO:0000779;GO:0000785;GO:0000795;GO:0000922;GO:0000940;GO:0001578;GO:0004672;GO:0004674;GO:0005515;GO:0005524;GO:0005634;GO:0005654;GO:0005694;GO:0005737;GO:0005813;GO:0005814;GO:0005815;GO:0005819;GO:0005829;GO:0005856;GO:0005876;GO:0006468;GO:0007049;GO:0007052;GO:0007062;GO:0007076;GO:…	K06631	EC:2.7.11.21	T;D	KOG0575;35A9C;38G8G;3BBT5;3D04F;3J83W;483MI;4927Q;4MA8I;4N1QA	polo like kinase 1 [Source:HGNC Symbol;Acc:HGNC:9077]	5347	P53350	GO:0000070//mitotic sister chromatid segregation;GO:0000086//G2/M transition of mitotic cell cycle;GO:0000122//negative regulation of transcription by RNA polymerase II;GO:0000132//establishment of mitotic spindle orientation;GO:0000278//mitotic cell cycle;GO:0000281//mitotic cytokinesis;GO:0001578//microtubule bundle formation;GO:0006468//protein phosphorylation;GO:0007049//cell cycle;GO:0007052…	GO:0000775//chromosome, centromeric region;GO:0000776//kinetochore;GO:0000779//condensed chromosome, centromeric region;GO:0000785//chromatin;GO:0000795//synaptonemal complex;GO:0000922//spindle pole;GO:0000940//outer kinetochore;GO:0005634//nucleus;GO:0005654//nucleoplasm;GO:0005694//chromosome;GO:0005737//cytoplasm;GO:0005813//centrosome;GO:0005814//centriole;GO:0005815//microtubule organizing …	GO:0000166//nucleotide binding;GO:0000287//magnesium ion binding;GO:0004672//protein kinase activity;GO:0004674//protein serine/threonine kinase activity;GO:0005515//protein binding;GO:0005524//ATP binding;GO:0008017//microtubule binding;GO:0010997//anaphase-promoting complex binding;GO:0016301//kinase activity;GO:0016740//transferase activity;GO:0019901//protein kinase binding;GO:0042802//identi…	ko04914(Progesterone-mediated oocyte maturation);ko04114(Oocyte meiosis);ko04110(Cell cycle);ko04068(FoxO signaling pathway)	PLK1
ENSG00000110104	522.42	11.3901047274914	12.0342715817477	11.5351051358055	6.04648777525463	6.10528390088449	5.93704457130898	0.5123	-0.9649	4.991e-16	5.574e-14	Nodiff	11	60842113	60851081	+	3342	CCDC86	GO:0003723;GO:0005515;GO:0005634;GO:0005654;GO:0005694;GO:0005730	K14822	-	S	KOG4538;35GMD;39WHV;3BJU0;3CUH2;3J252;48BRD;495IU;4M748;4MXPE	coiled-coil domain containing 86 [Source:HGNC Symbol;Acc:HGNC:28359]	79080	Q9H6F5	-	GO:0005634//nucleus;GO:0005654//nucleoplasm;GO:0005694//chromosome;GO:0005730//nucleolus;	GO:0003723//RNA binding;GO:0005515//protein binding;	-	CCDC86
ENSG00000168300	1359.98	5.98466147562595	7.57117770356815	6.24780533860842	15.5732905641397	14.7170159300998	13.1556211584754	2.1766	1.1221	5.825e-16	6.457e-14	Up Regulation	8	51817575	51899186	-	7323	PCMTD1	GO:0004719;GO:0005515;GO:0005737;GO:0006479;GO:0016020;GO:0036211	-	-	O	KOG1661;35M98;38G5V;3BBA7;3CUDC;3J3I4;480Q0;49168;4MAHI;4MS2E	protein-L-isoaspartate (D-aspartate) O- methyltransferase domain containing 1 [Source:HGNC Symbol;Acc:HGNC:30483]	115294	Q96MG8	GO:0006479//protein methylation;GO:0036211//protein modification process;	GO:0005737//cytoplasm;GO:0016020//membrane;	GO:0004719//protein-L-isoaspartate (D-aspartate) O-methyltransferase activity;GO:0005515//protein binding;	-	PCMTD1
ENSG00000101493	981.699	3.41823010343519	3.55016694251933	3.5514249846798	10.0233101521505	10.1773038371677	7.31750512654401	2.596	1.3763	6.047e-16	6.653e-14	Up Regulation	18	76357682	76495242	-	8777	ZNF516	GO:0000978;GO:0000981;GO:0000987;GO:0003677;GO:0005515;GO:0005634;GO:0006355;GO:0006357;GO:0009409;GO:0045893;GO:0046872;GO:0050873;GO:0060612;GO:0120162;GO:0140297	K22411	-	S;K	35DAI;39SEA;3BB12;3D2CT;3J2UY;48527;493RV;4MGAP;4MSXC	zinc finger protein 516 [Source:HGNC Symbol;Acc:HGNC:28990]	9658	Q92618;Q2YDX2	GO:0006355//regulation of transcription, DNA-templated;GO:0006357//regulation of transcription by RNA polymerase II;GO:0009409//response to cold;GO:0045893//positive regulation of transcription, DNA-templated;GO:0050873//brown fat cell differentiation;GO:0060612//adipose tissue development;GO:0120162//positive regulation of cold-induced thermogenesis;	GO:0005634//nucleus;	GO:0000978//RNA polymerase II cis-regulatory region sequence-specific DNA binding;GO:0000981//DNA-binding transcription factor activity, RNA polymerase II-specific;GO:0000987//cis-regulatory region sequence-specific DNA binding;GO:0003677//DNA binding;GO:0005515//protein binding;GO:0046872//metal ion binding;GO:0140297//DNA-binding transcription factor binding;	ko04714(Thermogenesis)	ZNF516
ENSG00000168411	1438.16	17.6031968157646	16.5841893310161	18.0234499166396	6.64911542709375	7.59794	9.09714138067708	0.4417	-1.179	6.298e-16	6.878e-14	Down Regulation	16	74621399	74666877	-	6456	RFWD3	GO:0000724;GO:0002039;GO:0004842;GO:0005515;GO:0005634;GO:0005654;GO:0005737;GO:0006281;GO:0006974;GO:0010212;GO:0016567;GO:0016605;GO:0016740;GO:0031297;GO:0031571;GO:0035861;GO:0036297;GO:0046872;GO:0061630;GO:0090734;GO:0097371;GO:2000001	K15691	EC:2.3.2.27	S;O	KOG1645;35PB4;39MKS;3BE0K;3CV8T;3J1QC;47Z5A;4905B;4M5QJ;4MUJQ	ring finger and WD repeat domain 3 [Source:HGNC Symbol;Acc:HGNC:25539]	55159	Q6PCD5	GO:0000724//double-strand break repair via homologous recombination;GO:0006281//DNA repair;GO:0006974//cellular response to DNA damage stimulus;GO:0010212//response to ionizing radiation;GO:0016567//protein ubiquitination;GO:0031297//replication fork processing;GO:0031571//mitotic G1 DNA damage checkpoint signaling;GO:0036297//interstrand cross-link repair;GO:2000001//regulation of DNA damage che…	GO:0005634//nucleus;GO:0005654//nucleoplasm;GO:0005737//cytoplasm;GO:0016605//PML body;GO:0035861//site of double-strand break;GO:0090734//site of DNA damage;	GO:0002039//p53 binding;GO:0004842//ubiquitin-protein transferase activity;GO:0005515//protein binding;GO:0016740//transferase activity;GO:0046872//metal ion binding;GO:0061630//ubiquitin protein ligase activity;GO:0097371//MDM2/MDM4 family protein binding;	-	RFWD3
ENSG00000112139	285.108	1.30245	2.16202123251392	1.79237090042423	0.421795786603434	0.339165256171637	0.585990682721131	0.2535	-1.98	6.972e-16	7.557e-14	Down Regulation	6	37630679	37699306	-	14690	MDGA1	GO:0001764;GO:0003674;GO:0005515;GO:0005576;GO:0005615;GO:0005794;GO:0005886;GO:0007399;GO:0007420;GO:0016020;GO:0021527;GO:0021799;GO:0030154;GO:0031225;GO:0046658;GO:0098982;GO:0099179;GO:1905606	-	-	S;T	2QUWH;35PE9;3AIWQ;3BYIW;3DBV2;3JEIV;48HYC;49EY7;4MENS;4MZ35	MAM domain containing glycosylphosphatidylinositol anchor 1 [Source:HGNC Symbol;Acc:HGNC:19267]	266727	Q8NFP4	GO:0001764//neuron migration;GO:0007399//nervous system development;GO:0007420//brain development;GO:0021527//spinal cord association neuron differentiation;GO:0021799//cerebral cortex radially oriented cell migration;GO:0030154//cell differentiation;GO:0099179//regulation of synaptic membrane adhesion;GO:1905606//regulation of presynapse assembly;	GO:0005576//extracellular region;GO:0005615//extracellular space;GO:0005794//Golgi apparatus;GO:0005886//plasma membrane;GO:0016020//membrane;GO:0031225//anchored component of membrane;GO:0046658//anchored component of plasma membrane;GO:0098982//GABA-ergic synapse;	GO:0003674//molecular_function;GO:0005515//protein binding;	-	MDGA1
ENSG00000076248	1267.81	19.4796619283558	17.910670848512	19.9025733465417	7.81563735216299	6.69541986211842	9.81033387612654	0.4185	-1.257	7.096e-16	7.59e-14	Down Regulation	12	109097597	109126725	+	5271	UNG	GO:0003684;GO:0004844;GO:0005515;GO:0005634;GO:0005654;GO:0005739;GO:0006281;GO:0006284;GO:0006974;GO:0016446;GO:0016447;GO:0016787;GO:0016799;GO:0019104;GO:0043024;GO:0043066;GO:0045008;GO:0045190;GO:0090304;GO:0097510	K03648	EC:3.2.2.27	L	KOG2994;35CGB;38HPB;3BGKX;3CW1J;3JEM1;485JP;490RY;4M75Z;4MX3B	uracil DNA glycosylase [Source:HGNC Symbol;Acc:HGNC:12572]	7374	P13051;E5KTA5	GO:0006281//DNA repair;GO:0006284//base-excision repair;GO:0006974//cellular response to DNA damage stimulus;GO:0016446//somatic hypermutation of immunoglobulin genes;GO:0016447//somatic recombination of immunoglobulin gene segments;GO:0043066//negative regulation of apoptotic process;GO:0045008//depyrimidination;GO:0045190//isotype switching;GO:0090304//nucleic acid metabolic process;GO:0097510/…	GO:0005634//nucleus;GO:0005654//nucleoplasm;GO:0005739//mitochondrion;	GO:0003684//damaged DNA binding;GO:0004844//uracil DNA N-glycosylase activity;GO:0005515//protein binding;GO:0016787//hydrolase activity;GO:0016799//hydrolase activity, hydrolyzing N-glycosyl compounds;GO:0019104//DNA N-glycosylase activity;GO:0043024//ribosomal small subunit binding;	ko05340(Primary immunodeficiency);ko03410(Base excision repair)	UNG
ENSG00000001561	939.048	6.66525600082526	8.04928169346702	8.11041896017715	14.6044471367169	15.352041064302	16.1041301415957	2.0006	1.0004	7.104e-16	7.59e-14	Up Regulation	6	46129989	46146688	+	4644	ENPP4	GO:0005515;GO:0005886;GO:0007596;GO:0007599;GO:0016020;GO:0016021;GO:0016787;GO:0030194;GO:0046130;GO:0046872;GO:0047710;GO:0070062;GO:0101003	K18424	EC:3.6.1.29	S;Z;K;B	KOG2645;359W0;38EE7;3BA91;3CRDS;3JAU8;486E7;48XKI;4M5Q8;4MV4P	ectonucleotide pyrophosphatase/phosphodiesterase 4 [Source:HGNC Symbol;Acc:HGNC:3359]	22875	Q9Y6X5	GO:0007596//blood coagulation;GO:0007599//hemostasis;GO:0030194//positive regulation of blood coagulation;GO:0046130//purine ribonucleoside catabolic process;	GO:0005886//plasma membrane;GO:0016020//membrane;GO:0016021//integral component of membrane;GO:0070062//extracellular exosome;GO:0101003//ficolin-1-rich granule membrane;	GO:0005515//protein binding;GO:0016787//hydrolase activity;GO:0046872//metal ion binding;GO:0047710//bis(5'-adenosyl)-triphosphatase activity;	ko00230(Purine metabolism)	ENPP4
ENSG00000070444	653.894	2.38315200002728	2.80347779313125	2.59184493958031	5.2158180280937	6.46238809069148	6.12545662540491	2.2703	1.1829	7.196e-16	7.632e-14	Up Regulation	17	2384073	2401104	-	8701	MNT	GO:0000122;GO:0000785;GO:0000977;GO:0000978;GO:0000981;GO:0001227;GO:0003677;GO:0003682;GO:0003700;GO:0005515;GO:0005634;GO:0005654;GO:0006355;GO:0006357;GO:0006366;GO:0046983;GO:0051726;GO:0090398;GO:2001234	K09115	-	S;K	KOG2483;35DU4;38EEK;3BDAJ;3CY2Z;3J8X8;483KF;494N1;4M6GJ;4N226	MAX network transcriptional repressor [Source:HGNC Symbol;Acc:HGNC:7188]	4335	Q99583	GO:0000122//negative regulation of transcription by RNA polymerase II;GO:0006355//regulation of transcription, DNA-templated;GO:0006357//regulation of transcription by RNA polymerase II;GO:0006366//transcription by RNA polymerase II;GO:0051726//regulation of cell cycle;GO:0090398//cellular senescence;GO:2001234//negative regulation of apoptotic signaling pathway;	GO:0000785//chromatin;GO:0005634//nucleus;GO:0005654//nucleoplasm;	GO:0000977//RNA polymerase II transcription regulatory region sequence-specific DNA binding;GO:0000978//RNA polymerase II cis-regulatory region sequence-specific DNA binding;GO:0000981//DNA-binding transcription factor activity, RNA polymerase II-specific;GO:0001227//DNA-binding transcription repressor activity, RNA polymerase II-specific;GO:0003677//DNA binding;GO:0003682//chromatin binding;GO:0…	-	MNT
ENSG00000171503	905.629	1.50479828473106	1.39484889318237	1.54361138288079	2.90510083584423	2.71900339648544	2.85237632160464	1.8862	0.9155	7.899e-16	8.274e-14	Nodiff	4	158671968	158710742	+	23865	ETFDH	GO:0004174;GO:0005515;GO:0005739;GO:0005743;GO:0005759;GO:0006979;GO:0009055;GO:0016020;GO:0016021;GO:0016491;GO:0022900;GO:0022904;GO:0031305;GO:0031966;GO:0033539;GO:0046872;GO:0048038;GO:0048039;GO:0050660;GO:0051536;GO:0051539	K00311	EC:1.5.5.1	C	KOG2415;35HUW;38H8R;3BH2N;3CWV6;3J1P9;484PU;48WYX;4MEYC;4MXKJ	electron transfer flavoprotein dehydrogenase [Source:HGNC Symbol;Acc:HGNC:3483]	2110	Q16134;B4DEQ0	GO:0006979//response to oxidative stress;GO:0022900//electron transport chain;GO:0022904//respiratory electron transport chain;GO:0033539//fatty acid beta-oxidation using acyl-CoA dehydrogenase;	GO:0005739//mitochondrion;GO:0005743//mitochondrial inner membrane;GO:0005759//mitochondrial matrix;GO:0016020//membrane;GO:0016021//integral component of membrane;GO:0031305//integral component of mitochondrial inner membrane;GO:0031966//mitochondrial membrane;	GO:0004174//electron-transferring-flavoprotein dehydrogenase activity;GO:0005515//protein binding;GO:0009055//electron transfer activity;GO:0016491//oxidoreductase activity;GO:0046872//metal ion binding;GO:0048038//quinone binding;GO:0048039//ubiquinone binding;GO:0050660//flavin adenine dinucleotide binding;GO:0051536//iron-sulfur cluster binding;GO:0051539//4 iron, 4 sulfur cluster binding;	-	ETFDH
ENSG00000143162	1200.14	9.37406859625961	13.2357796424625	11.120848168447	33.0919567176563	32.3643282482621	25.1747478881608	2.6716	1.4177	7.949e-16	8.274e-14	Up Regulation	1	167529117	167553805	-	3286	CREG1	GO:0003714;GO:0005576;GO:0005615;GO:0005667;GO:0006355;GO:0006357;GO:0035578;GO:0045892;GO:0070062	K25476	-	S;K	KOG3374;35GGJ;39RDV;3BJRK;3D14I;3J6QW;489YD;497TP;4MCT2;4N1IB	cellular repressor of E1A stimulated genes 1 [Source:HGNC Symbol;Acc:HGNC:2351]	8804	O75629	GO:0006355//regulation of transcription, DNA-templated;GO:0006357//regulation of transcription by RNA polymerase II;GO:0045892//negative regulation of transcription, DNA-templated;	GO:0005576//extracellular region;GO:0005615//extracellular space;GO:0005667//transcription regulator complex;GO:0035578//azurophil granule lumen;GO:0070062//extracellular exosome;	GO:0003714//transcription corepressor activity;	-	CREG1
ENSG00000102384	1566.88	19.6873399071943	17.1583551359721	18.5792098650625	5.98115440583633	5.84554040875404	8.85026486961418	0.3675	-1.444	7.969e-16	8.274e-14	Down Regulation	X	101098188	101166126	+	6981	CENPI	GO:0000775;GO:0000776;GO:0005515;GO:0005634;GO:0005654;GO:0005694;GO:0005829;GO:0007548;GO:0016604;GO:0034508	K11501	-	S	2QU9H;359GC;39TER;3BHMC;3CWQ8;3JCG4;486SA;496F4;4MHM0;4N02C	centromere protein I [Source:HGNC Symbol;Acc:HGNC:3968]	2491	Q92674;A0A024RCG4	GO:0007548//sex differentiation;GO:0034508//centromere complex assembly;	GO:0000775//chromosome, centromeric region;GO:0000776//kinetochore;GO:0005634//nucleus;GO:0005654//nucleoplasm;GO:0005694//chromosome;GO:0005829//cytosol;GO:0016604//nuclear body;	GO:0005515//protein binding;	-	CENPI
ENSG00000185418	733.966	6.14978862000239	6.70036380312454	6.37400191330271	13.169098978918	11.8227668229578	11.8950264124659	1.8998	0.9259	8.067e-16	8.317e-14	Nodiff	15	101653596	101724473	-	4455	TARS3	GO:0000166;GO:0003674;GO:0004812;GO:0004829;GO:0005515;GO:0005524;GO:0005575;GO:0005634;GO:0005737;GO:0006399;GO:0006412;GO:0006418;GO:0006435;GO:0008150;GO:0016874;GO:0042802;GO:0043039;GO:0140101	K01868	EC:6.1.1.3	J	KOG1637;35NZ4;38C5Y;3B9Y5;3CVGA;3JDX2;4843X;497ZS;4M5RX;4N5HW	threonyl-tRNA synthetase 3 [Source:HGNC Symbol;Acc:HGNC:24728]	123283	A2RTX5	GO:0006399//tRNA metabolic process;GO:0006412//translation;GO:0006418//tRNA aminoacylation for protein translation;GO:0006435//threonyl-tRNA aminoacylation;GO:0008150//biological_process;GO:0043039//tRNA aminoacylation;	GO:0005575//cellular_component;GO:0005634//nucleus;GO:0005737//cytoplasm;	GO:0000166//nucleotide binding;GO:0003674//molecular_function;GO:0004812//aminoacyl-tRNA ligase activity;GO:0004829//threonine-tRNA ligase activity;GO:0005515//protein binding;GO:0005524//ATP binding;GO:0016874//ligase activity;GO:0042802//identical protein binding;GO:0140101//catalytic activity, acting on a tRNA;	ko00970(Aminoacyl-tRNA biosynthesis)	TARS3
ENSG00000156966	2357.75	71.4616761965557	51.6763681285876	59.6684135142576	13.4376431802596	6.27527179453774	16.7097778726069	0.195	-2.358	8.362e-16	8.561e-14	Down Regulation	2	231395710	231401164	+	3639	B3GNT7	GO:0000139;GO:0005515;GO:0005794;GO:0006486;GO:0008194;GO:0008375;GO:0008499;GO:0008532;GO:0016020;GO:0016021;GO:0016266;GO:0016740;GO:0016757;GO:0016758;GO:0018146;GO:0030311	K09664	EC:2.4.1.-	M;G	KOG2287;35EET;38RD5;3BFA5;3D0DP;3JEWQ;485SY;495EE;4M7T6;4N20B	UDP-GlcNAc:betaGal beta-1,3-N- acetylglucosaminyltransferase 7 [Source:HGNC Symbol;Acc:HGNC:18811]	93010	Q8NFL0	GO:0006486//protein glycosylation;GO:0016266//O-glycan processing;GO:0018146//keratan sulfate biosynthetic process;GO:0030311//poly-N-acetyllactosamine biosynthetic process;	GO:0000139//Golgi membrane;GO:0005794//Golgi apparatus;GO:0016020//membrane;GO:0016021//integral component of membrane;	GO:0005515//protein binding;GO:0008194//UDP-glycosyltransferase activity;GO:0008375//acetylglucosaminyltransferase activity;GO:0008499//UDP-galactose:beta-N-acetylglucosamine beta-1,3-galactosyltransferase activity;GO:0008532//N-acetyllactosaminide beta-1,3-N-acetylglucosaminyltransferase activity;GO:0016740//transferase activity;GO:0016757//glycosyltransferase activity;GO:0016758//hexosyltransfe…	ko00533(Glycosaminoglycan biosynthesis - keratan sulfate)	B3GNT7
ENSG00000060762	390.945	8.65012418278644	8.89507915362852	9.16466455678426	20.1477133591138	20.8326350947654	18.3627134543761	2.2021	1.1388	8.529e-16	8.645e-14	Up Regulation	6	166364919	166383013	-	1546	MPC1	GO:0003674;GO:0005515;GO:0005739;GO:0005743;GO:0006850;GO:0008150;GO:0016020;GO:0016021;GO:0031305;GO:0050833;GO:0098800	K22138	-	C;U	KOG1590;35Q8A;3A5JS;3BSV6;3D9BE;3JGY4;48EJ0;49BH8;4MN4D;4N75E	mitochondrial pyruvate carrier 1 [Source:HGNC Symbol;Acc:HGNC:21606]	51660	Q9Y5U8	GO:0006850//mitochondrial pyruvate transmembrane transport;GO:0008150//biological_process;	GO:0005739//mitochondrion;GO:0005743//mitochondrial inner membrane;GO:0016020//membrane;GO:0016021//integral component of membrane;GO:0031305//integral component of mitochondrial inner membrane;GO:0098800//inner mitochondrial membrane protein complex;	GO:0003674//molecular_function;GO:0005515//protein binding;GO:0050833//pyruvate transmembrane transporter activity;	ko05415(Diabetic cardiomyopathy)	MPC1
ENSG00000166257	108.458	0.0599838165762311	0.059907849414903	0.0530260905867832	0.95821238432609	2.07774986006515	0.438690438485077	20.1268	4.331	8.561e-16	8.645e-14	Up Regulation	11	123629187	123655244	-	10020	SCN3B	GO:0001518;GO:0005244;GO:0005272;GO:0005515;GO:0005886;GO:0006811;GO:0006814;GO:0007399;GO:0010460;GO:0010765;GO:0016020;GO:0016021;GO:0017080;GO:0019233;GO:0019871;GO:0030018;GO:0034220;GO:0034765;GO:0035725;GO:0044325;GO:0051899;GO:0060048;GO:0060371;GO:0060373;GO:0061337;GO:0072659;GO:0086002;GO:0086005;GO:0086006;GO:0086010;GO:0086012;GO:0086014;GO:0086015;GO:0086091;GO:2000649	K04847	-	T;P	2QWH0;35ACP;38HHI;3BH30;3D153;3JD1Z;487BX;48XFC;4MB4B;4MWQT	sodium voltage-gated channel beta subunit 3 [Source:HGNC Symbol;Acc:HGNC:20665]	55800	Q9NY72;A0A024R3H7	GO:0006811//ion transport;GO:0006814//sodium ion transport;GO:0007399//nervous system development;GO:0010460//positive regulation of heart rate;GO:0010765//positive regulation of sodium ion transport;GO:0019233//sensory perception of pain;GO:0034220//ion transmembrane transport;GO:0034765//regulation of ion transmembrane transport;GO:0035725//sodium ion transmembrane transport;GO:0051899//membran…	GO:0001518//voltage-gated sodium channel complex;GO:0005886//plasma membrane;GO:0016020//membrane;GO:0016021//integral component of membrane;GO:0030018//Z disc;	GO:0005244//voltage-gated ion channel activity;GO:0005272//sodium channel activity;GO:0005515//protein binding;GO:0017080//sodium channel regulator activity;GO:0019871//sodium channel inhibitor activity;GO:0044325//transmembrane transporter binding;GO:0086006//voltage-gated sodium channel activity involved in cardiac muscle cell action potential;	-	SCN3B
ENSG00000163083	995.559	20.6063868195511	23.8980439572622	24.6933539376967	11.7876221140075	11.7480036848968	12.7396059104981	0.5192	-0.9456	9.038e-16	9.064e-14	Nodiff	2	120346136	120351803	+	3206	INHBB	GO:0001541;GO:0005125;GO:0005179;GO:0005515;GO:0005576;GO:0005615;GO:0006952;GO:0007283;GO:0008083;GO:0008584;GO:0008585;GO:0009267;GO:0009611;GO:0010259;GO:0010862;GO:0014070;GO:0017085;GO:0021983;GO:0030154;GO:0032686;GO:0032869;GO:0032924;GO:0034698;GO:0042803;GO:0044320;GO:0044650;GO:0045444;GO:0046676;GO:0046789;GO:0046881;GO:0046882;GO:0048471;GO:0048599;GO:0060279;GO:0060395;GO:0071277;GO:…	K22687	-	M;T	KOG3900;35KSX;39RUX;3BCF3;3CVBF;3J9AM;489ZQ;48UZ4;4MATS;4MYHW	inhibin subunit beta B [Source:HGNC Symbol;Acc:HGNC:6067]	3625	P09529	GO:0001541//ovarian follicle development;GO:0006952//defense response;GO:0007283//spermatogenesis;GO:0008584//male gonad development;GO:0008585//female gonad development;GO:0009267//cellular response to starvation;GO:0009611//response to wounding;GO:0010259//multicellular organism aging;GO:0010862//positive regulation of pathway-restricted SMAD protein phosphorylation;GO:0014070//response to orga…	GO:0005576//extracellular region;GO:0005615//extracellular space;GO:0048471//perinuclear region of cytoplasm;GO:0071944//cell periphery;	GO:0005125//cytokine activity;GO:0005179//hormone activity;GO:0005515//protein binding;GO:0008083//growth factor activity;GO:0042803//protein homodimerization activity;GO:0046789//host cell surface receptor binding;	ko04550(Signaling pathways regulating pluripotency of stem cells);ko04350(TGF-beta signaling pathway);ko04060(Cytokine-cytokine receptor interaction)	INHBB
ENSG00000167889	561.449	7.19633431625761	6.5776311288453	6.34555983490837	3.27749382154841	2.7915507196628	3.3948879770204	0.4642	-1.107	1.036e-15	1.032e-13	Down Regulation	17	76868404	76950393	+	6438	MGAT5B	GO:0000139;GO:0005515;GO:0005794;GO:0006486;GO:0006487;GO:0016020;GO:0016021;GO:0016740;GO:0016757;GO:0018242;GO:0030144;GO:0030145;GO:0046872	K09661	EC:2.4.1.-	S;G	2QWJG;35GX8;39E40;3BCXN;3DFKB;3JF8K;48J16;490VZ;4M6EK;4N4HS	alpha-1,6-mannosylglycoprotein 6-beta-N- acetylglucosaminyltransferase B [Source:HGNC Symbol;Acc:HGNC:24140]	146664	Q3V5L5	GO:0006486//protein glycosylation;GO:0006487//protein N-linked glycosylation;GO:0018242//protein O-linked glycosylation via serine;	GO:0000139//Golgi membrane;GO:0005794//Golgi apparatus;GO:0016020//membrane;GO:0016021//integral component of membrane;	GO:0005515//protein binding;GO:0016740//transferase activity;GO:0016757//glycosyltransferase activity;GO:0030144//alpha-1,6-mannosylglycoprotein 6-beta-N-acetylglucosaminyltransferase activity;GO:0030145//manganese ion binding;GO:0046872//metal ion binding;	ko00515(Mannose type O-glycan biosynthesis);ko00510(N-Glycan biosynthesis)	MGAT5B
ENSG00000092470	935.859	21.0402780193595	17.6068946424995	19.586343261224	6.32018797648155	5.07691155051738	8.62907555276177	0.3383	-1.564	1.204e-15	1.191e-13	Down Regulation	15	43826980	43868412	+	4054	WDR76	GO:0000792;GO:0003677;GO:0005515;GO:0005634;GO:0006974;GO:0019899;GO:0090734;GO:2000001	K24755	-	H;S;L	KOG4328;3592N;38E0S;3BGHI;3D2B4;3J7TD;481SI;48WWT;4MAHR;4MUSX	WD repeat domain 76 [Source:HGNC Symbol;Acc:HGNC:25773]	79968	Q9H967	GO:0006974//cellular response to DNA damage stimulus;GO:2000001//regulation of DNA damage checkpoint;	GO:0000792//heterochromatin;GO:0005634//nucleus;GO:0090734//site of DNA damage;	GO:0003677//DNA binding;GO:0005515//protein binding;GO:0019899//enzyme binding;	-	WDR76
ENSG00000138834	1270.76	3.82968851897038	3.96205230049496	4.21033037915881	7.76121888867905	9.19242977618691	8.09583662582012	2.0695	1.0493	1.262e-15	1.24e-13	Up Regulation	16	1706166	1770351	+	11666	MAPK8IP3	GO:0000139;GO:0005078;GO:0005515;GO:0005737;GO:0005794;GO:0008432;GO:0016192;GO:0019894;GO:0030159;GO:0030424;GO:0030425;GO:0030426;GO:0031103;GO:0031410;GO:0042995;GO:0043066;GO:0043410;GO:0044297;GO:0046328;GO:0046330;GO:0048471;GO:0050821;GO:0061564;GO:0099641;GO:1904115	K04436	-	S;T	KOG2077;35I7U;38BAW;3BB0Y;3CT9C;3JE7S;48AR7;48XB8;4MBGU;4N1GV	mitogen-activated protein kinase 8 interacting protein 3 [Source:HGNC Symbol;Acc:HGNC:6884]	23162	Q9UPT6	GO:0016192//vesicle-mediated transport;GO:0031103//axon regeneration;GO:0043066//negative regulation of apoptotic process;GO:0043410//positive regulation of MAPK cascade;GO:0046328//regulation of JNK cascade;GO:0046330//positive regulation of JNK cascade;GO:0050821//protein stabilization;GO:0061564//axon development;GO:0099641//anterograde axonal protein transport;	GO:0000139//Golgi membrane;GO:0005737//cytoplasm;GO:0005794//Golgi apparatus;GO:0030424//axon;GO:0030425//dendrite;GO:0030426//growth cone;GO:0031410//cytoplasmic vesicle;GO:0042995//cell projection;GO:0044297//cell body;GO:0048471//perinuclear region of cytoplasm;GO:1904115//axon cytoplasm;	GO:0005078//MAP-kinase scaffold activity;GO:0005515//protein binding;GO:0008432//JUN kinase binding;GO:0019894//kinesin binding;GO:0030159//signaling receptor complex adaptor activity;	ko04010(MAPK signaling pathway)	MAPK8IP3
ENSG00000114554	2247.23	13.5971326093028	15.4458854279783	14.2190158067637	8.72473990525024	7.48612407597726	8.48792134999156	0.5649	-0.824	1.281e-15	1.251e-13	Nodiff	3	126982693	127037389	+	11235	PLXNA1	GO:0002116;GO:0005515;GO:0005654;GO:0005829;GO:0005886;GO:0005887;GO:0007162;GO:0007165;GO:0008360;GO:0014910;GO:0016020;GO:0016021;GO:0017154;GO:0021628;GO:0021828;GO:0030334;GO:0043087;GO:0050772;GO:0060666;GO:0070062;GO:0071526;GO:0097485;GO:1902287;GO:1990138	K06820	-	Q;T;B	KOG3610;35NCV;38DZI;3B9A7;3CS6M;3J5B7;4806H;48XPD;4MC50;4MZ75	plexin A1 [Source:HGNC Symbol;Acc:HGNC:9099]	5361	Q9UIW2	GO:0007162//negative regulation of cell adhesion;GO:0007165//signal transduction;GO:0008360//regulation of cell shape;GO:0014910//regulation of smooth muscle cell migration;GO:0021628//olfactory nerve formation;GO:0021828//gonadotrophin-releasing hormone neuronal migration to the hypothalamus;GO:0030334//regulation of cell migration;GO:0043087//regulation of GTPase activity;GO:0050772//positive r…	GO:0002116//semaphorin receptor complex;GO:0005654//nucleoplasm;GO:0005829//cytosol;GO:0005886//plasma membrane;GO:0005887//integral component of plasma membrane;GO:0016020//membrane;GO:0016021//integral component of membrane;GO:0070062//extracellular exosome;	GO:0005515//protein binding;GO:0017154//semaphorin receptor activity;	ko04360(Axon guidance)	PLXNA1
ENSG00000108561	2180.72	70.2926841021234	67.2608994344259	65.836830724606	37.246170125233	35.0546849503551	41.3107991073063	0.5517	-0.8579	1.83e-15	1.766e-13	Nodiff	17	5432777	5448830	-	2335	C1QBP	GO:0000122;GO:0001849;GO:0002250;GO:0002376;GO:0003714;GO:0003729;GO:0005080;GO:0005515;GO:0005540;GO:0005576;GO:0005615;GO:0005634;GO:0005730;GO:0005737;GO:0005739;GO:0005759;GO:0005829;GO:0005886;GO:0006397;GO:0006915;GO:0006955;GO:0006958;GO:0008134;GO:0008380;GO:0009986;GO:0014065;GO:0016020;GO:0030449;GO:0030984;GO:0031690;GO:0032689;GO:0032695;GO:0039534;GO:0039536;GO:0042254;GO:0042256;GO:…	K15414	-	K;L;V	KOG4024;35EGQ;39UTR;3BB5X;3CWEQ;3JBGE;4885H;48ZJ5;4M8ZI;4N3CM	complement C1q binding protein [Source:HGNC Symbol;Acc:HGNC:1243]	708	Q07021	GO:0000122//negative regulation of transcription by RNA polymerase II;GO:0002250//adaptive immune response;GO:0002376//immune system process;GO:0006397//mRNA processing;GO:0006915//apoptotic process;GO:0006955//immune response;GO:0006958//complement activation, classical pathway;GO:0008380//RNA splicing;GO:0014065//phosphatidylinositol 3-kinase signaling;GO:0030449//regulation of complement activ…	GO:0005576//extracellular region;GO:0005615//extracellular space;GO:0005634//nucleus;GO:0005730//nucleolus;GO:0005737//cytoplasm;GO:0005739//mitochondrion;GO:0005759//mitochondrial matrix;GO:0005829//cytosol;GO:0005886//plasma membrane;GO:0009986//cell surface;GO:0016020//membrane;GO:0048786//presynaptic active zone;GO:0098793//presynapse;GO:0098978//glutamatergic synapse;GO:0098982//GABA-ergic s…	GO:0001849//complement component C1q complex binding;GO:0003714//transcription corepressor activity;GO:0003729//mRNA binding;GO:0005080//protein kinase C binding;GO:0005515//protein binding;GO:0005540//hyaluronic acid binding;GO:0008134//transcription factor binding;GO:0030984//kininogen binding;GO:0031690//adrenergic receptor binding;GO:0097177//mitochondrial ribosome binding;	-	C1QBP
ENSG00000170515	1931.19	43.6368023624458	36.9647252160493	42.0505785407479	18.8982089876385	20.8757162562626	20.3787843008087	0.4849	-1.044	1.833e-15	1.766e-13	Down Regulation	12	56104537	56113910	+	3580	PA2G4	GO:0003676;GO:0003714;GO:0003723;GO:0005515;GO:0005576;GO:0005634;GO:0005730;GO:0005737;GO:0006364;GO:0006417;GO:0016020;GO:0031625;GO:0035578;GO:0043066;GO:0045597;GO:0045892;GO:0070062;GO:1990904	-	-	F;J;T;K	KOG2776;35A1B;38EEE;3BHZ9;3CXWQ;3J2TS;482SI;4923J;4M74F;4N4BV	proliferation-associated 2G4 [Source:HGNC Symbol;Acc:HGNC:8550]	5036	Q9UQ80;A0A024RB85	GO:0006364//rRNA processing;GO:0006417//regulation of translation;GO:0043066//negative regulation of apoptotic process;GO:0045597//positive regulation of cell differentiation;GO:0045892//negative regulation of transcription, DNA-templated;	GO:0005576//extracellular region;GO:0005634//nucleus;GO:0005730//nucleolus;GO:0005737//cytoplasm;GO:0016020//membrane;GO:0035578//azurophil granule lumen;GO:0070062//extracellular exosome;GO:1990904//ribonucleoprotein complex;	GO:0003676//nucleic acid binding;GO:0003714//transcription corepressor activity;GO:0003723//RNA binding;GO:0005515//protein binding;GO:0031625//ubiquitin protein ligase binding;	-	PA2G4
ENSG00000160193	257.813	7.93920207781607	6.85620452856235	9.16368828681991	2.63000952089502	2.14464600378697	3.18857023419227	0.3277	-1.61	1.86e-15	1.781e-13	Down Regulation	21	42843094	42879568	-	2738	WDR4	GO:0005515;GO:0005634;GO:0005654;GO:0005694;GO:0005829;GO:0006400;GO:0006974;GO:0008033;GO:0008176;GO:0030488;GO:0036265;GO:0043527;GO:0106004	K15443	-	Q;J;I	KOG3914;35K5E;38GWF;3BDQ2;3D1ZJ;3J2DY;48201;498NA;4M5X4;4MYRF	WD repeat domain 4 [Source:HGNC Symbol;Acc:HGNC:12756]	10785	P57081	GO:0006400//tRNA modification;GO:0006974//cellular response to DNA damage stimulus;GO:0008033//tRNA processing;GO:0030488//tRNA methylation;GO:0036265//RNA (guanine-N7)-methylation;GO:0106004//tRNA (guanine-N7)-methylation;	GO:0005634//nucleus;GO:0005654//nucleoplasm;GO:0005694//chromosome;GO:0005829//cytosol;GO:0043527//tRNA methyltransferase complex;	GO:0005515//protein binding;GO:0008176//tRNA (guanine-N7-)-methyltransferase activity;	-	WDR4
ENSG00000144596	56.3161	0.463412696822847	0.436050756299147	0.451867271509992	0.0798186996902091	0.0898009735258524	0.0821614413626128	0.1842	-2.441	1.93e-15	1.835e-13	Down Regulation	3	14489107	14556075	-	11889	GRIP2	GO:0005515;GO:0005737;GO:0005829;GO:0005886;GO:0007219;GO:0014069;GO:0014824;GO:0015031;GO:0016020;GO:0030159;GO:0030425;GO:0035254;GO:0043025;GO:0044309;GO:0045211;GO:0045777;GO:0098887;GO:0098978;GO:0099003	K20251	-	S;O;T	KOG3528;35HE9;38EC1;3BGHJ;3CWPV;3J9X1;480JC;48W17;4MM4H;4MV4T	glutamate receptor interacting protein 2 [Source:HGNC Symbol;Acc:HGNC:23841]	80852	Q9C0E4	GO:0007219//Notch signaling pathway;GO:0014824//artery smooth muscle contraction;GO:0015031//protein transport;GO:0045777//positive regulation of blood pressure;GO:0098887//neurotransmitter receptor transport, endosome to postsynaptic membrane;GO:0099003//vesicle-mediated transport in synapse;	GO:0005737//cytoplasm;GO:0005829//cytosol;GO:0005886//plasma membrane;GO:0014069//postsynaptic density;GO:0016020//membrane;GO:0030425//dendrite;GO:0043025//neuronal cell body;GO:0044309//neuron spine;GO:0045211//postsynaptic membrane;GO:0098978//glutamatergic synapse;	GO:0005515//protein binding;GO:0030159//signaling receptor complex adaptor activity;GO:0035254//glutamate receptor binding;	-	GRIP2
ENSG00000136603	4379.99	13.0011184038973	20.9250429545313	18.1158166894944	52.8589320182768	43.3685504688598	43.7760292990987	2.671	1.4174	2.041e-15	1.929e-13	Up Regulation	3	170357678	170396835	+	7782	SKIL	GO:0000122;GO:0000978;GO:0000981;GO:0001227;GO:0001669;GO:0001825;GO:0002260;GO:0003682;GO:0005515;GO:0005634;GO:0005654;GO:0005667;GO:0007179;GO:0007283;GO:0008625;GO:0008630;GO:0030154;GO:0030512;GO:0030514;GO:0032991;GO:0034097;GO:0045596;GO:0046332;GO:0050772;GO:0051726;GO:0070306;GO:0110165;GO:1902043;GO:1902231	K18499	-	S;K	2QT5P;35HT4;39UDQ;3BIYT;3CWZS;3J88T;48ARS;491P2;4M6C5;4MVC5	SKI like proto-oncogene [Source:HGNC Symbol;Acc:HGNC:10897]	6498	P12757	GO:0000122//negative regulation of transcription by RNA polymerase II;GO:0001825//blastocyst formation;GO:0002260//lymphocyte homeostasis;GO:0007179//transforming growth factor beta receptor signaling pathway;GO:0007283//spermatogenesis;GO:0008625//extrinsic apoptotic signaling pathway via death domain receptors;GO:0008630//intrinsic apoptotic signaling pathway in response to DNA damage;GO:003015…	GO:0001669//acrosomal vesicle;GO:0005634//nucleus;GO:0005654//nucleoplasm;GO:0005667//transcription regulator complex;GO:0032991//protein-containing complex;GO:0110165//cellular anatomical entity;	GO:0000978//RNA polymerase II cis-regulatory region sequence-specific DNA binding;GO:0000981//DNA-binding transcription factor activity, RNA polymerase II-specific;GO:0001227//DNA-binding transcription repressor activity, RNA polymerase II-specific;GO:0003682//chromatin binding;GO:0005515//protein binding;GO:0046332//SMAD binding;	ko04550(Signaling pathways regulating pluripotency of stem cells)	SKIL
ENSG00000077152	813.274	35.0864923363932	32.431338617735	34.0143596764352	12.6682858893691	11.5553845456986	17.2081817597117	0.4022	-1.314	2.061e-15	1.936e-13	Down Regulation	1	202331544	202341984	-	1930	UBE2T	GO:0000166;GO:0000209;GO:0003682;GO:0004842;GO:0005515;GO:0005524;GO:0005634;GO:0005654;GO:0005730;GO:0006281;GO:0006513;GO:0006974;GO:0016567;GO:0016740;GO:0019787;GO:0031625;GO:0032446;GO:0035519;GO:0044314;GO:0051865;GO:0061631;GO:0070534;GO:0070936;GO:0070979;GO:0085020	K13960	EC:2.3.2.23	-	-	ubiquitin conjugating enzyme E2 T [Source:HGNC Symbol;Acc:HGNC:25009]	29089	Q9NPD8;A0A024R9A9	GO:0000209//protein polyubiquitination;GO:0006281//DNA repair;GO:0006513//protein monoubiquitination;GO:0006974//cellular response to DNA damage stimulus;GO:0016567//protein ubiquitination;GO:0032446//protein modification by small protein conjugation;GO:0035519//protein K29-linked ubiquitination;GO:0044314//protein K27-linked ubiquitination;GO:0051865//protein autoubiquitination;GO:0070534//prote…	GO:0005634//nucleus;GO:0005654//nucleoplasm;GO:0005730//nucleolus;	GO:0000166//nucleotide binding;GO:0003682//chromatin binding;GO:0004842//ubiquitin-protein transferase activity;GO:0005515//protein binding;GO:0005524//ATP binding;GO:0016740//transferase activity;GO:0019787//ubiquitin-like protein transferase activity;GO:0031625//ubiquitin protein ligase binding;GO:0061631//ubiquitin conjugating enzyme activity;	ko03460(Fanconi anemia pathway)	UBE2T
ENSG00000104321	75.7721	1.34984858153462	0.98906533248503	1.11651468910863	0.211144935751222	0.112176913501325	0.259791855414921	0.1657	-2.593	2.171e-15	2.026e-13	Down Regulation	8	72019917	72075584	-	6345	TRPA1	GO:0005216;GO:0005262;GO:0005515;GO:0005886;GO:0005887;GO:0006811;GO:0006816;GO:0006874;GO:0007166;GO:0009409;GO:0009410;GO:0010033;GO:0014070;GO:0015267;GO:0015278;GO:0016020;GO:0016021;GO:0019233;GO:0032421;GO:0034220;GO:0042542;GO:0042802;GO:0048265;GO:0050896;GO:0050955;GO:0050966;GO:0050968;GO:0051209;GO:0051289;GO:0055085;GO:0070301;GO:0070588;GO:0071310;GO:0097604	K04984	-	S;Z;D	KOG0510;35KDU;38G7Q;3BCDU;3D0P6;3J72R;4896E;491BV;4M8KS;4MU9B	transient receptor potential cation channel subfamily A member 1 [Source:HGNC Symbol;Acc:HGNC:497]	8989	O75762	GO:0006811//ion transport;GO:0006816//calcium ion transport;GO:0006874//cellular calcium ion homeostasis;GO:0007166//cell surface receptor signaling pathway;GO:0009409//response to cold;GO:0009410//response to xenobiotic stimulus;GO:0010033//response to organic substance;GO:0014070//response to organic cyclic compound;GO:0019233//sensory perception of pain;GO:0034220//ion transmembrane transport;…	GO:0005886//plasma membrane;GO:0005887//integral component of plasma membrane;GO:0016020//membrane;GO:0016021//integral component of membrane;GO:0032421//stereocilium bundle;	GO:0005216//ion channel activity;GO:0005262//calcium channel activity;GO:0005515//protein binding;GO:0015267//channel activity;GO:0015278//calcium-release channel activity;GO:0042802//identical protein binding;GO:0097604//temperature-gated cation channel activity;	ko04750(Inflammatory mediator regulation of TRP channels)	TRPA1
ENSG00000177000	888.667	2.11865882842365	2.91978567390692	2.88179200667764	6.16251657054723	6.35226253244566	5.8595891648458	2.3049	1.2047	2.749e-15	2.549e-13	Up Regulation	1	11785723	11806455	-	11513	MTHFR	GO:0001666;GO:0001843;GO:0003824;GO:0004489;GO:0005829;GO:0006555;GO:0008152;GO:0009086;GO:0009410;GO:0016491;GO:0031060;GO:0033274;GO:0035999;GO:0043200;GO:0044877;GO:0045202;GO:0046500;GO:0046653;GO:0050660;GO:0050661;GO:0050667;GO:0051593;GO:0070555;GO:0070828;GO:0071949;GO:0072341;GO:0106312;GO:0106313	K25004	EC:1.5.1.53	E	KOG0564;35JT8;38D0F;3BH35;3CT0Y;3J6GM;482MM;495HX;4M6Z3;4N4HC	methylenetetrahydrofolate reductase [Source:HGNC Symbol;Acc:HGNC:7436]	4524	P42898;Q8IU67;Q59GJ6	GO:0001666//response to hypoxia;GO:0001843//neural tube closure;GO:0006555//methionine metabolic process;GO:0008152//metabolic process;GO:0009086//methionine biosynthetic process;GO:0009410//response to xenobiotic stimulus;GO:0031060//regulation of histone methylation;GO:0033274//response to vitamin B2;GO:0035999//tetrahydrofolate interconversion;GO:0043200//response to amino acid;GO:0046500//S-a…	GO:0005829//cytosol;GO:0045202//synapse;	GO:0003824//catalytic activity;GO:0004489//methylenetetrahydrofolate reductase (NAD(P)H) activity;GO:0016491//oxidoreductase activity;GO:0044877//protein-containing complex binding;GO:0050660//flavin adenine dinucleotide binding;GO:0050661//NADP binding;GO:0071949//FAD binding;GO:0072341//modified amino acid binding;GO:0106312//methylenetetrahydrofolate reductase NADH activity;GO:0106313//methyle…	ko01523(Antifolate resistance);ko00670(One carbon pool by folate)	MTHFR
ENSG00000099840	51.1413	0.198899406228405	0.256107530842969	0.298375450762693	2.31749670569002	1.64878801879587	1.58688743452002	7.35	2.8777	3.096e-15	2.852e-13	Up Regulation	19	2096429	2099593	+	2770	IZUMO4	GO:0005576;GO:0005634	-	-	S	2SNMJ;35B3H;3A4M0;3BS4J;3D54W;3J3ZC;4841A;493IC;4M9D0;4N34S	IZUMO family member 4 [Source:HGNC Symbol;Acc:HGNC:26950]	113177	Q1ZYL8	-	GO:0005576//extracellular region;GO:0005634//nucleus;	-	-	IZUMO4
ENSG00000138180	3649.9	107.813027281291	85.4956054601824	96.1685	23.2377320186095	22.7269455303658	40.2369509519345	0.2928	-1.772	3.275e-15	2.999e-13	Down Regulation	10	93496612	93529092	+	3291	CEP55	GO:0000281;GO:0005515;GO:0005737;GO:0005813;GO:0005814;GO:0005815;GO:0005856;GO:0007049;GO:0014066;GO:0016020;GO:0030496;GO:0032154;GO:0042802;GO:0045171;GO:0045184;GO:0051301;GO:0061952;GO:0090543;GO:1904888	K16456	-	S;Z	2QTDI;35NBM;38DC3;3BEHY;3D11I;3JBGY;480DM;491TW;4M68N;4MXTC	centrosomal protein 55 [Source:HGNC Symbol;Acc:HGNC:1161]	55165	Q53EZ4	GO:0000281//mitotic cytokinesis;GO:0007049//cell cycle;GO:0014066//regulation of phosphatidylinositol 3-kinase signaling;GO:0045184//establishment of protein localization;GO:0051301//cell division;GO:0061952//midbody abscission;GO:1904888//cranial skeletal system development;	GO:0005737//cytoplasm;GO:0005813//centrosome;GO:0005814//centriole;GO:0005815//microtubule organizing center;GO:0005856//cytoskeleton;GO:0016020//membrane;GO:0030496//midbody;GO:0032154//cleavage furrow;GO:0045171//intercellular bridge;GO:0090543//Flemming body;	GO:0005515//protein binding;GO:0042802//identical protein binding;	-	CEP55
ENSG00000147162	9333.96	40.5882945492318	40.5981250335661	40.186200221086	65.8719214075899	64.0632248730373	72.915037759003	1.6522	0.7244	3.352e-15	3.034e-13	Nodiff	X	71533087	71575892	+	9803	OGT	GO:0000122;GO:0000123;GO:0000423;GO:0005515;GO:0005547;GO:0005634;GO:0005654;GO:0005737;GO:0005739;GO:0005829;GO:0005886;GO:0006110;GO:0006111;GO:0006325;GO:0006357;GO:0006486;GO:0006493;GO:0006915;GO:0007165;GO:0007584;GO:0008289;GO:0008375;GO:0016020;GO:0016262;GO:0016485;GO:0016580;GO:0016740;GO:0016757;GO:0017122;GO:0030097;GO:0030336;GO:0030512;GO:0031397;GO:0031490;GO:0031966;GO:0032435;GO:…	K09667	EC:2.4.1.255	O;T;G;B	KOG1124;KOG4626;35DQM;38EM5;3BC3N;3CWN6;3J5EJ;4870C;48X60;4MB6D;4MYV7	O-linked N-acetylglucosamine (GlcNAc) transferase [Source:HGNC Symbol;Acc:HGNC:8127]	8473	O15294	GO:0000122//negative regulation of transcription by RNA polymerase II;GO:0000423//mitophagy;GO:0006110//regulation of glycolytic process;GO:0006111//regulation of gluconeogenesis;GO:0006325//chromatin organization;GO:0006357//regulation of transcription by RNA polymerase II;GO:0006486//protein glycosylation;GO:0006493//protein O-linked glycosylation;GO:0006915//apoptotic process;GO:0007165//signa…	GO:0000123//histone acetyltransferase complex;GO:0005634//nucleus;GO:0005654//nucleoplasm;GO:0005737//cytoplasm;GO:0005739//mitochondrion;GO:0005829//cytosol;GO:0005886//plasma membrane;GO:0016020//membrane;GO:0016580//Sin3 complex;GO:0017122//protein N-acetylglucosaminyltransferase complex;GO:0031966//mitochondrial membrane;GO:0032991//protein-containing complex;GO:0042995//cell projection;GO:00…	GO:0005515//protein binding;GO:0005547//phosphatidylinositol-3,4,5-trisphosphate binding;GO:0008289//lipid binding;GO:0008375//acetylglucosaminyltransferase activity;GO:0016262//protein N-acetylglucosaminyltransferase activity;GO:0016740//transferase activity;GO:0016757//glycosyltransferase activity;GO:0031490//chromatin DNA binding;GO:0097363//protein O-GlcNAc transferase activity;	ko04931(Insulin resistance);ko00514(Other types of O-glycan biosynthesis)	OGT
ENSG00000134504	468.449	3.99785864441537	3.89305274544071	3.98466041485713	2.06372093400542	2.02517693501134	2.00167495155759	0.5074	-0.9787	3.354e-15	3.034e-13	Nodiff	18	26454910	26657401	-	8845	KCTD1	GO:0003714;GO:0005515;GO:0005634;GO:0005654;GO:0005730;GO:0005829;GO:0008134;GO:0034451;GO:0042802;GO:0045171;GO:0045892;GO:0051260	K21754	-	S;K;P	KOG2723;35CKR;38EBT;3BA0Z;3CX3D;3J8PX;486HC;492JB;4MCUB;4N42T	potassium channel tetramerization domain containing 1 [Source:HGNC Symbol;Acc:HGNC:18249]	284252	Q719H9;A0A024RC45	GO:0045892//negative regulation of transcription, DNA-templated;GO:0051260//protein homooligomerization;	GO:0005634//nucleus;GO:0005654//nucleoplasm;GO:0005730//nucleolus;GO:0005829//cytosol;GO:0034451//centriolar satellite;GO:0045171//intercellular bridge;	GO:0003714//transcription corepressor activity;GO:0005515//protein binding;GO:0008134//transcription factor binding;GO:0042802//identical protein binding;	-	KCTD1
ENSG00000087586	2602.8	87.3605492820246	70.2633809857093	82.6661298378198	17.1964	13.6737163710151	29.9834227118731	0.2485	-2.008	3.388e-15	3.045e-13	Down Regulation	20	56369389	56392337	-	2928	AURKA	GO:0000086;GO:0000166;GO:0000212;GO:0000226;GO:0000278;GO:0000922;GO:0004672;GO:0004674;GO:0004712;GO:0005515;GO:0005524;GO:0005634;GO:0005654;GO:0005737;GO:0005813;GO:0005814;GO:0005815;GO:0005819;GO:0005829;GO:0005856;GO:0005874;GO:0005876;GO:0005929;GO:0006468;GO:0006915;GO:0007049;GO:0007051;GO:0007052;GO:0007057;GO:0007098;GO:0007100;GO:0009611;GO:0009948;GO:0010389;GO:0010629;GO:0015630;GO:…	K11481	EC:2.7.11.1	H;T;D	KOG0580;35EAV;38BIB;3B9KX;3CZ1M;3JG27;484YB;4916S;4MHIR;4MU39	aurora kinase A [Source:HGNC Symbol;Acc:HGNC:11393]	6790	O14965	GO:0000086//G2/M transition of mitotic cell cycle;GO:0000212//meiotic spindle organization;GO:0000226//microtubule cytoskeleton organization;GO:0000278//mitotic cell cycle;GO:0006468//protein phosphorylation;GO:0006915//apoptotic process;GO:0007049//cell cycle;GO:0007051//spindle organization;GO:0007052//mitotic spindle organization;GO:0007057//spindle assembly involved in female meiosis I;GO:000…	GO:0000922//spindle pole;GO:0005634//nucleus;GO:0005654//nucleoplasm;GO:0005737//cytoplasm;GO:0005813//centrosome;GO:0005814//centriole;GO:0005815//microtubule organizing center;GO:0005819//spindle;GO:0005829//cytosol;GO:0005856//cytoskeleton;GO:0005874//microtubule;GO:0005876//spindle microtubule;GO:0005929//cilium;GO:0015630//microtubule cytoskeleton;GO:0016323//basolateral plasma membrane;GO:0…	GO:0000166//nucleotide binding;GO:0004672//protein kinase activity;GO:0004674//protein serine/threonine kinase activity;GO:0004712//protein serine/threonine/tyrosine kinase activity;GO:0005515//protein binding;GO:0005524//ATP binding;GO:0016301//kinase activity;GO:0016740//transferase activity;GO:0019901//protein kinase binding;GO:0031625//ubiquitin protein ligase binding;GO:0035174//histone seri…	ko04914(Progesterone-mediated oocyte maturation);ko04114(Oocyte meiosis)	AURKA
ENSG00000084731	1072.68	12.4179432302624	12.5322275947206	11.6116175849012	6.70624733593458	6.32887828127524	7.29637256791399	0.5495	-0.8637	4.018e-15	3.591e-13	Nodiff	2	25926598	25982749	-	6401	KIF3C	GO:0000166;GO:0003774;GO:0003777;GO:0005515;GO:0005524;GO:0005737;GO:0005829;GO:0005856;GO:0005871;GO:0005874;GO:0005929;GO:0007018;GO:0008017;GO:0016887;GO:0097542	K20197	-	Z	KOG4280;35MZB;39M8E;3BA0S;3CRJG;3JBE2;481JR;48W9I;4MFXR;4N049	kinesin family member 3C [Source:HGNC Symbol;Acc:HGNC:6321]	3797	O14782;A2RU78	GO:0007018//microtubule-based movement;	GO:0005737//cytoplasm;GO:0005829//cytosol;GO:0005856//cytoskeleton;GO:0005871//kinesin complex;GO:0005874//microtubule;GO:0005929//cilium;GO:0097542//ciliary tip;	GO:0000166//nucleotide binding;GO:0003774//cytoskeletal motor activity;GO:0003777//microtubule motor activity;GO:0005515//protein binding;GO:0005524//ATP binding;GO:0008017//microtubule binding;GO:0016887//ATP hydrolysis activity;	-	KIF3C
ENSG00000119138	120.459	0.674111532182409	0.619047428241113	0.646997829001588	2.10363443727916	1.77906416269117	2.07768548855675	3.0331	1.6008	4.32e-15	3.837e-13	Up Regulation	9	70384604	70414657	-	5201	KLF9	GO:0000785;GO:0000978;GO:0000981;GO:0003677;GO:0003700;GO:0005634;GO:0005654;GO:0005829;GO:0005886;GO:0006357;GO:0007623;GO:0010839;GO:0046872;GO:0048511;GO:0071387;GO:0097067	K09208	-	K	358WU;38DFS;3BGBZ;3D4AC;3JA99;489HE;4941E;4MM5B;4N4FC	Kruppel like factor 9 [Source:HGNC Symbol;Acc:HGNC:1123]	687	Q13886;A0A024R260	GO:0006357//regulation of transcription by RNA polymerase II;GO:0007623//circadian rhythm;GO:0010839//negative regulation of keratinocyte proliferation;GO:0048511//rhythmic process;GO:0071387//cellular response to cortisol stimulus;GO:0097067//cellular response to thyroid hormone stimulus;	GO:0000785//chromatin;GO:0005634//nucleus;GO:0005654//nucleoplasm;GO:0005829//cytosol;GO:0005886//plasma membrane;	GO:0000978//RNA polymerase II cis-regulatory region sequence-specific DNA binding;GO:0000981//DNA-binding transcription factor activity, RNA polymerase II-specific;GO:0003677//DNA binding;GO:0003700//DNA-binding transcription factor activity;GO:0046872//metal ion binding;	-	KLF9
ENSG00000123485	1866.59	50.7025729132635	38.7464146590747	46.7990521516011	7.58213258309603	6.28683196037669	15.2587770613697	0.2095	-2.255	4.364e-15	3.853e-13	Down Regulation	2	233833416	233854566	-	3821	HJURP	GO:0000775;GO:0000776;GO:0003677;GO:0005515;GO:0005634;GO:0005654;GO:0005694;GO:0005730;GO:0005739;GO:0007049;GO:0007059;GO:0034080;GO:0042393;GO:0042802;GO:0043229;GO:0043254;GO:0051101	K26092	-	S;B	2SJZT;3598T;39WP0;3BI38;3CYS9;3J1N7;488B8;491W5;4M7AV;4MZ4I	Holliday junction recognition protein [Source:HGNC Symbol;Acc:HGNC:25444]	55355	Q8NCD3	GO:0007049//cell cycle;GO:0007059//chromosome segregation;GO:0034080//CENP-A containing chromatin assembly;GO:0043254//regulation of protein-containing complex assembly;GO:0051101//regulation of DNA binding;	GO:0000775//chromosome, centromeric region;GO:0000776//kinetochore;GO:0005634//nucleus;GO:0005654//nucleoplasm;GO:0005694//chromosome;GO:0005730//nucleolus;GO:0005739//mitochondrion;GO:0043229//intracellular organelle;	GO:0003677//DNA binding;GO:0005515//protein binding;GO:0042393//histone binding;GO:0042802//identical protein binding;	-	HJURP
ENSG00000088832	8721.73	98.0179046854574	108.857986671861	106.428355995565	56.6905858920248	60.3661523490784	65.5586247695223	0.5771	-0.7931	4.531e-15	3.976e-13	Nodiff	20	1368977	1393164	-	5973	FKBP1A	GO:0000413;GO:0003007;GO:0003755;GO:0005160;GO:0005515;GO:0005527;GO:0005528;GO:0005737;GO:0005829;GO:0006457;GO:0006458;GO:0007183;GO:0014802;GO:0016020;GO:0016021;GO:0016529;GO:0016853;GO:0022417;GO:0030018;GO:0030512;GO:0031312;GO:0031398;GO:0032092;GO:0032515;GO:0032880;GO:0032925;GO:0033017;GO:0034713;GO:0042026;GO:0042110;GO:0043123;GO:0044325;GO:0046332;GO:0048185;GO:0050776;GO:0055010;GO:…	K09568	EC:5.2.1.8	O	KOG0544;35Q2S;3A3EV;3BRJS;3D8CB;3JH48;48EPX;49BH2;4MJKC;4N768	FKBP prolyl isomerase 1A [Source:HGNC Symbol;Acc:HGNC:3711]	2280	P62942;Q0VDC6	GO:0000413//protein peptidyl-prolyl isomerization;GO:0003007//heart morphogenesis;GO:0006457//protein folding;GO:0006458//'de novo' protein folding;GO:0007183//SMAD protein complex assembly;GO:0022417//protein maturation by protein folding;GO:0030512//negative regulation of transforming growth factor beta receptor signaling pathway;GO:0031398//positive regulation of protein ubiquitination;GO:0032…	GO:0005737//cytoplasm;GO:0005829//cytosol;GO:0014802//terminal cisterna;GO:0016020//membrane;GO:0016021//integral component of membrane;GO:0016529//sarcoplasmic reticulum;GO:0030018//Z disc;GO:0031312//extrinsic component of organelle membrane;GO:0033017//sarcoplasmic reticulum membrane;GO:0098562//cytoplasmic side of membrane;GO:1990425//ryanodine receptor complex;	GO:0003755//peptidyl-prolyl cis-trans isomerase activity;GO:0005160//transforming growth factor beta receptor binding;GO:0005515//protein binding;GO:0005527//macrolide binding;GO:0005528//FK506 binding;GO:0016853//isomerase activity;GO:0034713//type I transforming growth factor beta receptor binding;GO:0044325//transmembrane transporter binding;GO:0046332//SMAD binding;GO:0048185//activin binding;	-	FKBP1A
ENSG00000076685	3319.14	10.585203687235	12.1898439409323	12.1212	28.433073533925	35.444012789262	24.6890404786212	2.5238	1.3356	4.791e-15	4.18e-13	Up Regulation	10	103087185	103277605	-	9137	NT5C2	GO:0000166;GO:0000255;GO:0003824;GO:0005515;GO:0005524;GO:0005737;GO:0005829;GO:0006204;GO:0008152;GO:0008253;GO:0009117;GO:0016740;GO:0016787;GO:0042802;GO:0046037;GO:0046040;GO:0046054;GO:0046085;GO:0046872;GO:0046939;GO:0050146;GO:0050483;GO:0050484;GO:0106411	K01081	EC:3.1.3.5	F;O	KOG2469;35ADZ;38DSH;3B9SY;3CXWG;3JAD8;47YUS;48Y6P;4MCUX;4MV24	5'-nucleotidase, cytosolic II [Source:HGNC Symbol;Acc:HGNC:8022]	22978	P49902;A0A384MED8;A8K6K2	GO:0000255//allantoin metabolic process;GO:0006204//IMP catabolic process;GO:0008152//metabolic process;GO:0009117//nucleotide metabolic process;GO:0046037//GMP metabolic process;GO:0046040//IMP metabolic process;GO:0046054//dGMP metabolic process;GO:0046085//adenosine metabolic process;GO:0046939//nucleotide phosphorylation;	GO:0005737//cytoplasm;GO:0005829//cytosol;	GO:0000166//nucleotide binding;GO:0003824//catalytic activity;GO:0005515//protein binding;GO:0005524//ATP binding;GO:0008253//5'-nucleotidase activity;GO:0016740//transferase activity;GO:0016787//hydrolase activity;GO:0042802//identical protein binding;GO:0046872//metal ion binding;GO:0050146//nucleoside phosphotransferase activity;GO:0050483//IMP 5'-nucleotidase activity;GO:0050484//GMP 5'-nucle…	ko00760(Nicotinate and nicotinamide metabolism);ko00240(Pyrimidine metabolism);ko00230(Purine metabolism)	NT5C2
ENSG00000055732	726.928	2.9867394779975	4.24273269839322	3.33323627804882	9.52267963463602	9.45578221959537	7.83415204093154	2.5229	1.3351	4.973e-15	4.313e-13	Up Regulation	1	85018082	85048500	-	6624	MCOLN3	GO:0000421;GO:0005261;GO:0005262;GO:0005737;GO:0005764;GO:0005765;GO:0005768;GO:0005886;GO:0006811;GO:0007626;GO:0008289;GO:0016020;GO:0016021;GO:0031410;GO:0031901;GO:0031902;GO:0034220;GO:0042491;GO:0051209;GO:0070588;GO:0072345;GO:0098655	K04994	-	O;P	KOG3733;35BZ5;38P58;3BA25;3CSPQ;3JCCT;480BW;490SG;4M7GP;4N5MH	mucolipin TRP cation channel 3 [Source:HGNC Symbol;Acc:HGNC:13358]	55283	Q8TDD5	GO:0006811//ion transport;GO:0007626//locomotory behavior;GO:0034220//ion transmembrane transport;GO:0042491//inner ear auditory receptor cell differentiation;GO:0051209//release of sequestered calcium ion into cytosol;GO:0070588//calcium ion transmembrane transport;GO:0098655//cation transmembrane transport;	GO:0000421//autophagosome membrane;GO:0005737//cytoplasm;GO:0005764//lysosome;GO:0005765//lysosomal membrane;GO:0005768//endosome;GO:0005886//plasma membrane;GO:0016020//membrane;GO:0016021//integral component of membrane;GO:0031410//cytoplasmic vesicle;GO:0031901//early endosome membrane;GO:0031902//late endosome membrane;	GO:0005261//cation channel activity;GO:0005262//calcium channel activity;GO:0008289//lipid binding;GO:0072345//NAADP-sensitive calcium-release channel activity;	ko04020(Calcium signaling pathway)	MCOLN3
ENSG00000146072	2626.68	59.0031354025821	49.7738560900063	55.9977149864727	29.8905	26.4807333900389	26.5432120871148	0.4971	-1.008	5.116e-15	4.411e-13	Down Regulation	6	47231532	47309905	-	3595	TNFRSF21	GO:0001783;GO:0002250;GO:0002376;GO:0005515;GO:0005737;GO:0005886;GO:0005887;GO:0006915;GO:0006959;GO:0007165;GO:0007413;GO:0016020;GO:0016021;GO:0030424;GO:0030889;GO:0031226;GO:0031642;GO:0032693;GO:0032696;GO:0032714;GO:0042130;GO:0042552;GO:0048713;GO:0050852;GO:0051402;GO:0071356;GO:0097252;GO:0110165	K05157	-	S;T	2QVMX;35KFK;38GPI;3BJEG;3CZ9S;3J5TF;486A3;495IC;4MB7V;4N63I	TNF receptor superfamily member 21 [Source:HGNC Symbol;Acc:HGNC:13469]	27242	O75509;A0A024RD71	GO:0001783//B cell apoptotic process;GO:0002250//adaptive immune response;GO:0002376//immune system process;GO:0006915//apoptotic process;GO:0006959//humoral immune response;GO:0007165//signal transduction;GO:0007413//axonal fasciculation;GO:0030889//negative regulation of B cell proliferation;GO:0031642//negative regulation of myelination;GO:0032693//negative regulation of interleukin-10 product…	GO:0005737//cytoplasm;GO:0005886//plasma membrane;GO:0005887//integral component of plasma membrane;GO:0016020//membrane;GO:0016021//integral component of membrane;GO:0030424//axon;GO:0031226//intrinsic component of plasma membrane;GO:0110165//cellular anatomical entity;	GO:0005515//protein binding;	ko04060(Cytokine-cytokine receptor interaction)	TNFRSF21
ENSG00000101911	463.707	12.7123063048612	14.0482702322995	12.6719154454236	5.86954977986819	4.92487358599204	6.88429577701215	0.4427	-1.175	5.309e-15	4.551e-13	Down Regulation	X	12791355	12824222	+	2758	PRPS2	GO:0000166;GO:0000287;GO:0002189;GO:0004749;GO:0005515;GO:0005524;GO:0005737;GO:0005829;GO:0006015;GO:0006098;GO:0006139;GO:0006164;GO:0006167;GO:0009156;GO:0009165;GO:0016208;GO:0016301;GO:0016310;GO:0016740;GO:0019003;GO:0019693;GO:0030246;GO:0031100;GO:0032991;GO:0042802;GO:0042803;GO:0043531;GO:0044249;GO:0046872	K00948	EC:2.7.6.1	F;E	KOG1448;35AJR;38CQV;3BD0G;3CU7N;3J2MW;47ZXS;48VRC;4MFXJ;4MX1P	phosphoribosyl pyrophosphate synthetase 2 [Source:HGNC Symbol;Acc:HGNC:9465]	5634	P11908	GO:0006015//5-phosphoribose 1-diphosphate biosynthetic process;GO:0006098//pentose-phosphate shunt;GO:0006139//nucleobase-containing compound metabolic process;GO:0006164//purine nucleotide biosynthetic process;GO:0006167//AMP biosynthetic process;GO:0009156//ribonucleoside monophosphate biosynthetic process;GO:0009165//nucleotide biosynthetic process;GO:0016310//phosphorylation;GO:0019693//ribos…	GO:0002189//ribose phosphate diphosphokinase complex;GO:0005737//cytoplasm;GO:0005829//cytosol;GO:0032991//protein-containing complex;	GO:0000166//nucleotide binding;GO:0000287//magnesium ion binding;GO:0004749//ribose phosphate diphosphokinase activity;GO:0005515//protein binding;GO:0005524//ATP binding;GO:0016208//AMP binding;GO:0016301//kinase activity;GO:0016740//transferase activity;GO:0019003//GDP binding;GO:0030246//carbohydrate binding;GO:0042802//identical protein binding;GO:0042803//protein homodimerization activity;GO…	ko00230(Purine metabolism);ko00030(Pentose phosphate pathway)	PRPS2
ENSG00000023445	2435.41	30.806054157155	22.6397600292308	25.6936494837212	9.40752427602466	11.6055096798799	9.40371875685854	0.3802	-1.395	5.465e-15	4.657e-13	Down Regulation	11	102317450	102339403	+	7518	BIRC3	GO:0004842;GO:0005515;GO:0005634;GO:0005654;GO:0005737;GO:0005829;GO:0006915;GO:0007166;GO:0007249;GO:0007283;GO:0016567;GO:0016740;GO:0031398;GO:0032991;GO:0033209;GO:0034121;GO:0038061;GO:0039535;GO:0042981;GO:0043027;GO:0043066;GO:0043067;GO:0043123;GO:0043154;GO:0044877;GO:0045088;GO:0045121;GO:0046872;GO:0050727;GO:0051726;GO:0052548;GO:0060544;GO:0060546;GO:0061630;GO:0070424;GO:2000116	K16060	-	O;D;K	KOG1101;35KRI;38BNS;3BC7N;3CSGM;3J2MG;4821R;494NE;4MDSK;4N5UD	baculoviral IAP repeat containing 3 [Source:HGNC Symbol;Acc:HGNC:591]	330	Q13489	GO:0006915//apoptotic process;GO:0007166//cell surface receptor signaling pathway;GO:0007249//I-kappaB kinase/NF-kappaB signaling;GO:0007283//spermatogenesis;GO:0016567//protein ubiquitination;GO:0031398//positive regulation of protein ubiquitination;GO:0033209//tumor necrosis factor-mediated signaling pathway;GO:0034121//regulation of toll-like receptor signaling pathway;GO:0038061//NIK/NF-kappa…	GO:0005634//nucleus;GO:0005654//nucleoplasm;GO:0005737//cytoplasm;GO:0005829//cytosol;GO:0032991//protein-containing complex;GO:0045121//membrane raft;	GO:0004842//ubiquitin-protein transferase activity;GO:0005515//protein binding;GO:0016740//transferase activity;GO:0043027//cysteine-type endopeptidase inhibitor activity involved in apoptotic process;GO:0044877//protein-containing complex binding;GO:0046872//metal ion binding;GO:0061630//ubiquitin protein ligase activity;	ko05222(Small cell lung cancer);ko05202(Transcriptional misregulation in cancer);ko05200(Pathways in cancer);ko05168(Herpes simplex virus 1 infection);ko05145(Toxoplasmosis);ko05132(Salmonella infection);ko04668(TNF signaling pathway);ko04621(NOD-like receptor signaling pathway);ko04510(Focal adhesion);ko04390(Hippo signaling pathway);ko04217(Necroptosis);ko04215(Apoptosis - multiple species);ko0…	BIRC3
ENSG00000196584	610.336	8.31149828164294	7.16831608833347	7.72737946239239	2.44132238737014	2.75042638975401	3.68313778888881	0.377	-1.407	5.731e-15	4.856e-13	Down Regulation	7	152644776	152676193	-	6448	XRCC2	GO:0000278;GO:0000400;GO:0000724;GO:0001701;GO:0001756;GO:0003677;GO:0005515;GO:0005524;GO:0005634;GO:0005654;GO:0005657;GO:0005737;GO:0005813;GO:0005815;GO:0005856;GO:0006259;GO:0006281;GO:0006310;GO:0006974;GO:0007098;GO:0010165;GO:0010332;GO:0022008;GO:0033063;GO:0035264;GO:0042148;GO:0043231;GO:0043524;GO:0050769;GO:0051321;GO:0140664;GO:2000269	K10879	-	S;L	KOG2859;35AC2;38DE8;3BGAK;3CYCF;3J4SR;483BW;48YFX;4MF0D;4N2EX	X-ray repair cross complementing 2 [Source:HGNC Symbol;Acc:HGNC:12829]	7516	O43543;A0A384MEK2	GO:0000278//mitotic cell cycle;GO:0000724//double-strand break repair via homologous recombination;GO:0001701//in utero embryonic development;GO:0001756//somitogenesis;GO:0006259//DNA metabolic process;GO:0006281//DNA repair;GO:0006310//DNA recombination;GO:0006974//cellular response to DNA damage stimulus;GO:0007098//centrosome cycle;GO:0010165//response to X-ray;GO:0010332//response to gamma ra…	GO:0005634//nucleus;GO:0005654//nucleoplasm;GO:0005657//replication fork;GO:0005737//cytoplasm;GO:0005813//centrosome;GO:0005815//microtubule organizing center;GO:0005856//cytoskeleton;GO:0033063//Rad51B-Rad51C-Rad51D-XRCC2 complex;GO:0043231//intracellular membrane-bounded organelle;	GO:0000400//four-way junction DNA binding;GO:0003677//DNA binding;GO:0005515//protein binding;GO:0005524//ATP binding;GO:0140664//ATP-dependent DNA damage sensor activity;	ko03440(Homologous recombination)	XRCC2
ENSG00000100401	1974.99	24.0473908464858	23.2476467653339	24.6014213127744	11.1169821707363	13.1270846500611	13.0240990227283	0.5131	-0.9628	6.002e-15	5.057e-13	Nodiff	22	41244779	41286187	-	6136	RANGAP1	GO:0000775;GO:0000776;GO:0003723;GO:0005096;GO:0005515;GO:0005634;GO:0005635;GO:0005643;GO:0005654;GO:0005694;GO:0005737;GO:0005819;GO:0005829;GO:0005856;GO:0006913;GO:0007165;GO:0016235;GO:0016925;GO:0030425;GO:0031267;GO:0031625;GO:0031965;GO:0043231;GO:0044614;GO:0045296;GO:0046826;GO:0048471;GO:0048678;GO:0050790;GO:0051168;GO:0071375;GO:0072686;GO:0090630;GO:0106068;GO:1904115;GO:1904117;GO:…	K14319	-	A;T;Y	KOG1909;35M31;38P1F;3BGDD;3CS61;3JB17;47YUA;49484;4M84A;4N32D	Ran GTPase activating protein 1 [Source:HGNC Symbol;Acc:HGNC:9854]	5905	P46060;A0A024R1U0;Q9BSK3	GO:0006913//nucleocytoplasmic transport;GO:0007165//signal transduction;GO:0016925//protein sumoylation;GO:0046826//negative regulation of protein export from nucleus;GO:0048678//response to axon injury;GO:0050790//regulation of catalytic activity;GO:0051168//nuclear export;GO:0071375//cellular response to peptide hormone stimulus;GO:0090630//activation of GTPase activity;GO:1904117//cellular res…	GO:0000775//chromosome, centromeric region;GO:0000776//kinetochore;GO:0005634//nucleus;GO:0005635//nuclear envelope;GO:0005643//nuclear pore;GO:0005654//nucleoplasm;GO:0005694//chromosome;GO:0005737//cytoplasm;GO:0005819//spindle;GO:0005829//cytosol;GO:0005856//cytoskeleton;GO:0016235//aggresome;GO:0030425//dendrite;GO:0031965//nuclear membrane;GO:0043231//intracellular membrane-bounded organelle…	GO:0003723//RNA binding;GO:0005096//GTPase activator activity;GO:0005515//protein binding;GO:0031267//small GTPase binding;GO:0031625//ubiquitin protein ligase binding;GO:0045296//cadherin binding;	ko03013(Nucleocytoplasmic transport)	RANGAP1
ENSG00000157557	3543.25	70.233793784289	55.0749743120682	62.0723110987694	14.3114648359768	13.8720040321665	25.5636856079774	0.2819	-1.827	6.732e-15	5.639e-13	Down Regulation	21	38805183	38824955	+	4977	ETS2	GO:0000122;GO:0000785;GO:0000977;GO:0000978;GO:0000981;GO:0001227;GO:0001501;GO:0001712;GO:0003677;GO:0003700;GO:0005515;GO:0005634;GO:0005654;GO:0005829;GO:0005886;GO:0006355;GO:0006357;GO:0007498;GO:0019904;GO:0030154;GO:0043565;GO:0045944;GO:0061629;GO:0090009;GO:1990837	K21932	-	K	KOG3806;35FXD;38EII;3BBGE;3CSSW;3JE9D;485JT;48WC3;4M73I;4MS6Q	ETS proto-oncogene 2, transcription factor [Source:HGNC Symbol;Acc:HGNC:3489]	2114	P15036	GO:0000122//negative regulation of transcription by RNA polymerase II;GO:0001501//skeletal system development;GO:0001712//ectodermal cell fate commitment;GO:0006355//regulation of transcription, DNA-templated;GO:0006357//regulation of transcription by RNA polymerase II;GO:0007498//mesoderm development;GO:0030154//cell differentiation;GO:0045944//positive regulation of transcription by RNA polymer…	GO:0000785//chromatin;GO:0005634//nucleus;GO:0005654//nucleoplasm;GO:0005829//cytosol;GO:0005886//plasma membrane;	GO:0000977//RNA polymerase II transcription regulatory region sequence-specific DNA binding;GO:0000978//RNA polymerase II cis-regulatory region sequence-specific DNA binding;GO:0000981//DNA-binding transcription factor activity, RNA polymerase II-specific;GO:0001227//DNA-binding transcription repressor activity, RNA polymerase II-specific;GO:0003677//DNA binding;GO:0003700//DNA-binding transcript…	ko05166(Human T-cell leukemia virus 1 infection);ko04014(Ras signaling pathway)	ETS2
ENSG00000180537	723.805	14.8866132192592	12.2377710278895	13.3975632487934	6.34767988125447	6.35398862446789	6.62951031723167	0.4711	-1.086	7.695e-15	6.409e-13	Down Regulation	6	13924446	13980310	+	4098	RNF182	GO:0004842;GO:0005515;GO:0005737;GO:0016020;GO:0016021;GO:0016567;GO:0016740;GO:0046872	K11983	EC:2.3.2.27	O	KOG2177;35G7M;38GCP;3BI9T;3CTX8;3J5I3;47Z3E;498KY;4MEGP;4N523	ring finger protein 182 [Source:HGNC Symbol;Acc:HGNC:28522]	221687	Q8N6D2;A0A024QZW5	GO:0016567//protein ubiquitination;	GO:0005737//cytoplasm;GO:0016020//membrane;GO:0016021//integral component of membrane;	GO:0004842//ubiquitin-protein transferase activity;GO:0005515//protein binding;GO:0016740//transferase activity;GO:0046872//metal ion binding;	-	RNF182
ENSG00000175550	3370.51	176.786101637937	138.106094692032	142.652501004948	63.4717678270097	71.0935846576863	70.6590095486965	0.443	-1.174	7.911e-15	6.552e-13	Down Regulation	11	65919274	65921563	+	1722	DRAP1	GO:0000122;GO:0001046;GO:0001091;GO:0003677;GO:0003713;GO:0003714;GO:0005515;GO:0005634;GO:0006355;GO:0006366;GO:0016251;GO:0017025;GO:0017054;GO:0042802;GO:0045944;GO:0046982;GO:0090575	K21752	-	K	KOG1659;35NBJ;3A5QH;3BIZR;3D2PC;3J7K9;48AIB;48X1S;4MEVT;4MTJC	DR1 associated protein 1 [Source:HGNC Symbol;Acc:HGNC:3019]	10589	Q14919	GO:0000122//negative regulation of transcription by RNA polymerase II;GO:0006355//regulation of transcription, DNA-templated;GO:0006366//transcription by RNA polymerase II;GO:0045944//positive regulation of transcription by RNA polymerase II;	GO:0005634//nucleus;GO:0017054//negative cofactor 2 complex;GO:0090575//RNA polymerase II transcription regulator complex;	GO:0001046//core promoter sequence-specific DNA binding;GO:0001091//RNA polymerase II general transcription initiation factor binding;GO:0003677//DNA binding;GO:0003713//transcription coactivator activity;GO:0003714//transcription corepressor activity;GO:0005515//protein binding;GO:0016251//RNA polymerase II general transcription initiation factor activity;GO:0017025//TBP-class protein binding;GO…	-	DRAP1
ENSG00000197451	4046.28	143.685313525423	136.323450990111	139.784752901743	72.3991984151145	70.2072957203308	86.0422529637308	0.5379	-0.8946	7.983e-15	6.575e-13	Nodiff	5	178204533	178211163	+	2118	HNRNPAB	GO:0001837;GO:0003676;GO:0003723;GO:0003729;GO:0005515;GO:0005634;GO:0005654;GO:0005737;GO:0010468;GO:0010604;GO:0016556;GO:0030425;GO:0044877;GO:0045293;GO:0045893;GO:0051173;GO:0060341;GO:0071230;GO:0071598;GO:0090575;GO:0110165;GO:1901537;GO:1904580;GO:1990124;GO:1990837;GO:1990904;GO:2000623	K13044	-	H;A	KOG0118;35J90;38H08;3BAHX;3D02D;3J7DM;48997;48XB7;4MCHB;4N05B	heterogeneous nuclear ribonucleoprotein A/B [Source:HGNC Symbol;Acc:HGNC:5034]	3182	Q99729	GO:0001837//epithelial to mesenchymal transition;GO:0010468//regulation of gene expression;GO:0010604//positive regulation of macromolecule metabolic process;GO:0016556//mRNA modification;GO:0045893//positive regulation of transcription, DNA-templated;GO:0051173//positive regulation of nitrogen compound metabolic process;GO:0060341//regulation of cellular localization;GO:0071230//cellular respons…	GO:0005634//nucleus;GO:0005654//nucleoplasm;GO:0005737//cytoplasm;GO:0030425//dendrite;GO:0045293//mRNA editing complex;GO:0071598//neuronal ribonucleoprotein granule;GO:0090575//RNA polymerase II transcription regulator complex;GO:0110165//cellular anatomical entity;GO:1990124//messenger ribonucleoprotein complex;GO:1990904//ribonucleoprotein complex;	GO:0003676//nucleic acid binding;GO:0003723//RNA binding;GO:0003729//mRNA binding;GO:0005515//protein binding;GO:0044877//protein-containing complex binding;GO:1990837//sequence-specific double-stranded DNA binding;	-	HNRNPAB
ENSG00000107984	5287.32	184.24430323828	169.387549954596	169.638	90.6564352534668	99.9330382520194	93.2946357318267	0.5369	-0.8972	8.107e-15	6.64e-13	Nodiff	10	52314281	52318042	+	2221	DKK1	GO:0000122;GO:0000904;GO:0001706;GO:0001707;GO:0001942;GO:0002090;GO:0005515;GO:0005576;GO:0005615;GO:0005886;GO:0007275;GO:0007492;GO:0007611;GO:0008083;GO:0010628;GO:0010942;GO:0010977;GO:0016055;GO:0030111;GO:0030178;GO:0030279;GO:0030326;GO:0030514;GO:0030900;GO:0031901;GO:0032091;GO:0032526;GO:0033137;GO:0039706;GO:0042662;GO:0042663;GO:0043066;GO:0043507;GO:0045813;GO:0048019;GO:0050750;GO:…	K02165	-	S;T	KOG1218;35BBV;39U61;3BJ7E;3CY0M;3J7F0;480WE;4982I;4MBZ7;4MWB8	dickkopf WNT signaling pathway inhibitor 1 [Source:HGNC Symbol;Acc:HGNC:2891]	22943	O94907;I1W660	GO:0000122//negative regulation of transcription by RNA polymerase II;GO:0000904//cell morphogenesis involved in differentiation;GO:0001706//endoderm formation;GO:0001707//mesoderm formation;GO:0001942//hair follicle development;GO:0002090//regulation of receptor internalization;GO:0007275//multicellular organism development;GO:0007492//endoderm development;GO:0007611//learning or memory;GO:00106…	GO:0005576//extracellular region;GO:0005615//extracellular space;GO:0005886//plasma membrane;GO:0031901//early endosome membrane;	GO:0005515//protein binding;GO:0008083//growth factor activity;GO:0039706//co-receptor binding;GO:0048019//receptor antagonist activity;GO:0050750//low-density lipoprotein particle receptor binding;	ko05022(Pathways of neurodegeneration - multiple diseases);ko05010(Alzheimer disease);ko04310(Wnt signaling pathway)	DKK1
ENSG00000112118	2451.09	63.1680603590618	55.2143730987521	60.0722809103343	14.7785162978343	10.9677168700462	23.7839621816075	0.2726	-1.875	8.561e-15	6.973e-13	Down Regulation	6	52264014	52284881	-	3645	MCM3	GO:0000166;GO:0000727;GO:0000781;GO:0003677;GO:0003678;GO:0003697;GO:0004386;GO:0005515;GO:0005524;GO:0005634;GO:0005654;GO:0005658;GO:0005694;GO:0005737;GO:0005813;GO:0006259;GO:0006260;GO:0006268;GO:0006270;GO:0006271;GO:0007049;GO:0016020;GO:0016787;GO:0016887;GO:0017116;GO:0030174;GO:0032508;GO:0042555;GO:0048471;GO:0071162;GO:1902975	K02541	EC:5.6.2.3	L	KOG0479;35PEH;38CI6;3BD1Z;3CU0S;3J8VU;48BI0;495U3;4MH8R;4MVP4	minichromosome maintenance complex component 3 [Source:HGNC Symbol;Acc:HGNC:6945]	4172	P25205;A0A0S2Z4T1	GO:0000727//double-strand break repair via break-induced replication;GO:0006259//DNA metabolic process;GO:0006260//DNA replication;GO:0006268//DNA unwinding involved in DNA replication;GO:0006270//DNA replication initiation;GO:0006271//DNA strand elongation involved in DNA replication;GO:0007049//cell cycle;GO:0030174//regulation of DNA-dependent DNA replication initiation;GO:0032508//DNA duplex …	GO:0000781//chromosome, telomeric region;GO:0005634//nucleus;GO:0005654//nucleoplasm;GO:0005658//alpha DNA polymerase:primase complex;GO:0005694//chromosome;GO:0005737//cytoplasm;GO:0005813//centrosome;GO:0016020//membrane;GO:0042555//MCM complex;GO:0048471//perinuclear region of cytoplasm;GO:0071162//CMG complex;	GO:0000166//nucleotide binding;GO:0003677//DNA binding;GO:0003678//DNA helicase activity;GO:0003697//single-stranded DNA binding;GO:0004386//helicase activity;GO:0005515//protein binding;GO:0005524//ATP binding;GO:0016787//hydrolase activity;GO:0016887//ATP hydrolysis activity;GO:0017116//single-stranded DNA helicase activity;	ko04110(Cell cycle);ko03030(DNA replication)	MCM3
ENSG00000265972	86.7815	2.5154423191589	2.04412642275096	1.99843427601761	0.433684902025088	0.559561726545524	0.592893454713576	0.2381	-2.07	9.295e-15	7.529e-13	Down Regulation	1	145992435	145996579	-	3604	TXNIP	GO:0000122;GO:0004857;GO:0005515;GO:0005634;GO:0005737;GO:0005758;GO:0005829;GO:0006606;GO:0006979;GO:0007049;GO:0009410;GO:0009612;GO:0009749;GO:0015031;GO:0030216;GO:0031625;GO:0032355;GO:0032570;GO:0042127;GO:0042542;GO:0043065;GO:0043086;GO:0048008;GO:0051592;GO:0051782;GO:0071228	K20910	-	S;K;E	KOG3780;35IPS;39VGC;3BJFJ;3CRBQ;3JFGI;4831N;48ZCD;4M9ER;4MUBD	thioredoxin interacting protein [Source:HGNC Symbol;Acc:HGNC:16952]	10628	Q9H3M7	GO:0000122//negative regulation of transcription by RNA polymerase II;GO:0006606//protein import into nucleus;GO:0006979//response to oxidative stress;GO:0007049//cell cycle;GO:0009410//response to xenobiotic stimulus;GO:0009612//response to mechanical stimulus;GO:0009749//response to glucose;GO:0015031//protein transport;GO:0030216//keratinocyte differentiation;GO:0032355//response to estradiol;…	GO:0005634//nucleus;GO:0005737//cytoplasm;GO:0005758//mitochondrial intermembrane space;GO:0005829//cytosol;	GO:0004857//enzyme inhibitor activity;GO:0005515//protein binding;GO:0031625//ubiquitin protein ligase binding;	ko04621(NOD-like receptor signaling pathway)	TXNIP
ENSG00000204264	319.126	6.77894692591467	7.22903699514911	7.04017855961113	3.54498240460335	3.01680951535837	3.52622652026546	0.4741	-1.077	9.863e-15	7.946e-13	Down Regulation	6	32840717	32844679	-	3480	PSMB8	GO:0000502;GO:0002376;GO:0004175;GO:0004298;GO:0005515;GO:0005634;GO:0005654;GO:0005737;GO:0005829;GO:0005839;GO:0006508;GO:0008233;GO:0010498;GO:0016787;GO:0019774;GO:0019882;GO:0030154;GO:0045444;GO:0051603;GO:0052548;GO:0070062;GO:1990111	K02740	EC:3.4.25.1	O	KOG0175;35NGY;38EKC;3BGPE;3CTI6;3J5X9;48277;493HI;4MI4K;4N1DF	proteasome 20S subunit beta 8 [Source:HGNC Symbol;Acc:HGNC:9545]	5696	P28062;X5CMJ9	GO:0002376//immune system process;GO:0006508//proteolysis;GO:0010498//proteasomal protein catabolic process;GO:0019882//antigen processing and presentation;GO:0030154//cell differentiation;GO:0045444//fat cell differentiation;GO:0051603//proteolysis involved in cellular protein catabolic process;GO:0052548//regulation of endopeptidase activity;	GO:0000502//proteasome complex;GO:0005634//nucleus;GO:0005654//nucleoplasm;GO:0005737//cytoplasm;GO:0005829//cytosol;GO:0005839//proteasome core complex;GO:0019774//proteasome core complex, beta-subunit complex;GO:0070062//extracellular exosome;GO:1990111//spermatoproteasome complex;	GO:0004175//endopeptidase activity;GO:0004298//threonine-type endopeptidase activity;GO:0005515//protein binding;GO:0008233//peptidase activity;GO:0016787//hydrolase activity;	ko03050(Proteasome)	PSMB8
ENSG00000137801	1136.82	7.65681170316817	12.9782460062449	10.4430942326187	4.11437798784993	3.57513384403054	3.45320621966132	0.3564	-1.489	1.036e-14	8.298e-13	Down Regulation	15	39581079	39599466	+	9158	THBS1	GO:0001666;GO:0001786;GO:0001937;GO:0001953;GO:0001968;GO:0002040;GO:0002544;GO:0002581;GO:0002605;GO:0005178;GO:0005201;GO:0005509;GO:0005515;GO:0005576;GO:0005577;GO:0005615;GO:0005737;GO:0005783;GO:0005788;GO:0006954;GO:0006955;GO:0006986;GO:0007155;GO:0008201;GO:0008284;GO:0008285;GO:0009410;GO:0009612;GO:0009749;GO:0009897;GO:0009986;GO:0010595;GO:0010596;GO:0010748;GO:0010751;GO:0010754;GO:…	K16857	-	O;T;W	2QRK8;35IZP;38BZ6;3BC6D;3CRA6;3J4MU;4834K;48UZ9;4M6UA;4N2BZ	thrombospondin 1 [Source:HGNC Symbol;Acc:HGNC:11785]	7057	P07996	GO:0001666//response to hypoxia;GO:0001937//negative regulation of endothelial cell proliferation;GO:0001953//negative regulation of cell-matrix adhesion;GO:0002040//sprouting angiogenesis;GO:0002544//chronic inflammatory response;GO:0002581//negative regulation of antigen processing and presentation of peptide or polysaccharide antigen via MHC class II;GO:0002605//negative regulation of dendriti…	GO:0005576//extracellular region;GO:0005577//fibrinogen complex;GO:0005615//extracellular space;GO:0005737//cytoplasm;GO:0005783//endoplasmic reticulum;GO:0005788//endoplasmic reticulum lumen;GO:0009897//external side of plasma membrane;GO:0009986//cell surface;GO:0016529//sarcoplasmic reticulum;GO:0030141//secretory granule;GO:0031012//extracellular matrix;GO:0031091//platelet alpha granule;GO:0…	GO:0001786//phosphatidylserine binding;GO:0001968//fibronectin binding;GO:0005178//integrin binding;GO:0005201//extracellular matrix structural constituent;GO:0005509//calcium ion binding;GO:0005515//protein binding;GO:0008201//heparin binding;GO:0017134//fibroblast growth factor binding;GO:0030169//low-density lipoprotein particle binding;GO:0042802//identical protein binding;GO:0043236//laminin…	ko05219(Bladder cancer);ko05206(MicroRNAs in cancer);ko05205(Proteoglycans in cancer);ko05165(Human papillomavirus infection);ko05144(Malaria);ko04512(ECM-receptor interaction);ko04510(Focal adhesion);ko04350(TGF-beta signaling pathway);ko04151(PI3K-Akt signaling pathway);ko04145(Phagosome);ko04115(p53 signaling pathway);ko04015(Rap1 signaling pathway)	THBS1
ENSG00000128272	4604.06	51.2940829647628	53.1504741030685	50.8570197604587	158.748235129875	176.124676710399	108.480747188097	2.8368	1.5043	1.078e-14	8.591e-13	Up Regulation	22	39519695	39522683	+	2613	ATF4	GO:0000122;GO:0000785;GO:0000976;GO:0000977;GO:0000978;GO:0000981;GO:0001228;GO:0003677;GO:0003700;GO:0005515;GO:0005634;GO:0005654;GO:0005667;GO:0005737;GO:0005813;GO:0005815;GO:0005856;GO:0005886;GO:0006094;GO:0006355;GO:0006357;GO:0006366;GO:0006874;GO:0007214;GO:0007623;GO:0008022;GO:0008140;GO:0009636;GO:0010575;GO:0010628;GO:0016020;GO:0016607;GO:0019901;GO:0030182;GO:0030282;GO:0030968;GO:…	K04374	-	S;K	KOG4571;35GF3;38BSX;3BJ5H;3D1EH;3JAA7;489PP;490RQ;4MDVQ;4MV30	activating transcription factor 4 [Source:HGNC Symbol;Acc:HGNC:786]	468	P18848	GO:0000122//negative regulation of transcription by RNA polymerase II;GO:0006094//gluconeogenesis;GO:0006355//regulation of transcription, DNA-templated;GO:0006357//regulation of transcription by RNA polymerase II;GO:0006366//transcription by RNA polymerase II;GO:0006874//cellular calcium ion homeostasis;GO:0007214//gamma-aminobutyric acid signaling pathway;GO:0007623//circadian rhythm;GO:0009636…	GO:0000785//chromatin;GO:0005634//nucleus;GO:0005654//nucleoplasm;GO:0005667//transcription regulator complex;GO:0005737//cytoplasm;GO:0005813//centrosome;GO:0005815//microtubule organizing center;GO:0005856//cytoskeleton;GO:0005886//plasma membrane;GO:0016020//membrane;GO:0016607//nuclear speck;GO:0032590//dendrite membrane;GO:0032991//protein-containing complex;GO:0034399//nuclear periphery;GO:…	GO:0000976//transcription cis-regulatory region binding;GO:0000977//RNA polymerase II transcription regulatory region sequence-specific DNA binding;GO:0000978//RNA polymerase II cis-regulatory region sequence-specific DNA binding;GO:0000981//DNA-binding transcription factor activity, RNA polymerase II-specific;GO:0001228//DNA-binding transcription activator activity, RNA polymerase II-specific;GO…	ko05417(Lipid and atherosclerosis);ko05215(Prostate cancer);ko05207(Chemical carcinogenesis - receptor activation);ko05203(Viral carcinogenesis);ko05166(Human T-cell leukemia virus 1 infection);ko05163(Human cytomegalovirus infection);ko05161(Hepatitis B);ko05034(Alcoholism);ko05031(Amphetamine addiction);ko05030(Cocaine addiction);ko05022(Pathways of neurodegeneration - multiple diseases);ko0502…	ATF4
ENSG00000182919	659.879	3.5952973486232	4.27407351771963	4.00226168915504	8.06735154006088	8.36388132464855	7.52791346233809	2.0023	1.0017	1.227e-14	9.726e-13	Up Regulation	11	93741591	93764749	+	6269	C11orf54	GO:0005515;GO:0005634;GO:0005654;GO:0008270;GO:0016604;GO:0016787;GO:0016788;GO:0046872;GO:0070062	-	-	S	KOG4048;35JM9;38G3D;3BA2A;3CVMM;3J657;4825H;491NG;4M8GA;4N0CW	chromosome 11 open reading frame 54 [Source:HGNC Symbol;Acc:HGNC:30204]	28970	Q9H0W9;A0A024R396	-	GO:0005634//nucleus;GO:0005654//nucleoplasm;GO:0016604//nuclear body;GO:0070062//extracellular exosome;	GO:0005515//protein binding;GO:0008270//zinc ion binding;GO:0016787//hydrolase activity;GO:0016788//hydrolase activity, acting on ester bonds;GO:0046872//metal ion binding;	-	C11orf54
ENSG00000227057	1190.08	30.2992327804506	29.0465758077995	32.089606900028	17.1697699341827	15.7751010343649	18.1107454479464	0.5518	-0.8577	1.696e-14	1.337e-12	Nodiff	6	33279108	33289247	-	2835	WDR46	GO:0000462;GO:0003723;GO:0005515;GO:0005634;GO:0005654;GO:0005730;GO:0032040	K14768	-	A;S	KOG1272;35FFX;38EQ1;3BGZ2;3CXD5;3J1N3;484H9;48WMZ;4MHDC;4N05D	WD repeat domain 46 [Source:HGNC Symbol;Acc:HGNC:13923]	9277	O15213;A8K806	GO:0000462//maturation of SSU-rRNA from tricistronic rRNA transcript (SSU-rRNA, 5.8S rRNA, LSU-rRNA);	GO:0005634//nucleus;GO:0005654//nucleoplasm;GO:0005730//nucleolus;GO:0032040//small-subunit processome;	GO:0003723//RNA binding;GO:0005515//protein binding;	-	WDR46
ENSG00000105355	1061.67	29.6422764401274	27.2354934483298	30.1968001370766	13.4101895188437	15.1369720944374	15.8255827221539	0.5039	-0.9889	1.914e-14	1.501e-12	Nodiff	19	4838341	4867694	-	2739	PLIN3	GO:0005515;GO:0005737;GO:0005768;GO:0005794;GO:0005811;GO:0005829;GO:0010008;GO:0010890;GO:0016020;GO:0016192;GO:0019915;GO:0030133;GO:0042149;GO:0045296;GO:1905691	K20287	-	S;U	2R7TG;35IQ3;38FAS;3BJ03;3CWPU;3J6FB;4891T;49424;4MBE0;4N46M	perilipin 3 [Source:HGNC Symbol;Acc:HGNC:16893]	10226	O60664	GO:0010890//positive regulation of sequestering of triglyceride;GO:0016192//vesicle-mediated transport;GO:0019915//lipid storage;GO:0042149//cellular response to glucose starvation;GO:1905691//lipid droplet disassembly;	GO:0005737//cytoplasm;GO:0005768//endosome;GO:0005794//Golgi apparatus;GO:0005811//lipid droplet;GO:0005829//cytosol;GO:0010008//endosome membrane;GO:0016020//membrane;GO:0030133//transport vesicle;	GO:0005515//protein binding;GO:0045296//cadherin binding;	-	PLIN3
ENSG00000120334	562.415	8.28148301303865	7.58600080113705	8.52674594060358	4.15013240609177	4.01931075601915	4.37345630751741	0.5082	-0.9766	2.252e-14	1.757e-12	Nodiff	1	173799550	173824883	-	5165	CENPL	GO:0000775;GO:0005515;GO:0005634;GO:0005654;GO:0005694;GO:0005829	K11504	-	S	2QS38;35GH7;39VZF;3BHRC;3CWMA;3J9R2;484FK;48X6R;4MCVJ;4MZ2H	centromere protein L [Source:HGNC Symbol;Acc:HGNC:17879]	91687	Q8N0S6;A0A024R8Z8	-	GO:0000775//chromosome, centromeric region;GO:0005634//nucleus;GO:0005654//nucleoplasm;GO:0005694//chromosome;GO:0005829//cytosol;	GO:0005515//protein binding;	-	CENPL
ENSG00000182010	1299.74	12.6277479843569	10.0749160834389	11.0017541499621	3.3003793672382	2.91934317703093	5.04966605516494	0.3287	-1.605	2.34e-14	1.815e-12	Down Regulation	10	62183035	62268844	-	9793	RTKN2	GO:0005634;GO:0005737;GO:0005886;GO:0007165;GO:0008284;GO:0030097;GO:0051092;GO:1901224;GO:2001243	K24024	-	S;T	2QRWR;35HYD;38H1G;3BGZC;3CTI3;3J4FJ;4885A;48WFM;4MGQQ;4MSG6	rhotekin 2 [Source:HGNC Symbol;Acc:HGNC:19364]	219790	Q8IZC4	GO:0007165//signal transduction;GO:0008284//positive regulation of cell population proliferation;GO:0030097//hemopoiesis;GO:0051092//positive regulation of NF-kappaB transcription factor activity;GO:1901224//positive regulation of NIK/NF-kappaB signaling;GO:2001243//negative regulation of intrinsic apoptotic signaling pathway;	GO:0005634//nucleus;GO:0005737//cytoplasm;GO:0005886//plasma membrane;	-	-	RTKN2
ENSG00000146410	280.669	10.7737055368521	9.51087681022779	9.15655975139391	2.93916982375941	2.29991289237283	4.16144137377901	0.3139	-1.671	2.512e-14	1.939e-12	Down Regulation	6	136231024	136250335	-	2450	MTFR2	GO:0000266;GO:0005515;GO:0005739;GO:0007005;GO:0009060	-	-	S	2QUU8;35VQH;39UBG;3BMF8;3E4EF;3JNJ8;48R3Y;49MPX;4M7Y6;4MSJF	mitochondrial fission regulator 2 [Source:HGNC Symbol;Acc:HGNC:21115]	113115	Q6P444	GO:0000266//mitochondrial fission;GO:0007005//mitochondrion organization;GO:0009060//aerobic respiration;	GO:0005739//mitochondrion;	GO:0005515//protein binding;	-	MTFR2
ENSG00000155085	123.163	0.371966186066588	0.329617475351988	0.339050541917406	0.96177155913713	1.06892413392576	1.08210163362993	2.9536	1.5625	2.613e-14	2.007e-12	Up Regulation	6	109492855	109691217	-	10099	AK9	GO:0000166;GO:0004017;GO:0004550;GO:0005524;GO:0005634;GO:0005654;GO:0005737;GO:0005739;GO:0005829;GO:0006139;GO:0006174;GO:0006186;GO:0006756;GO:0006757;GO:0009117;GO:0009123;GO:0016301;GO:0016310;GO:0016740;GO:0016776;GO:0019205;GO:0031965;GO:0050145;GO:0061508;GO:0061565;GO:0061566;GO:0061567;GO:0061568;GO:0061569;GO:0061570;GO:0061571	K18533	-	F	KOG3079;KOG3078;35II6;38H4Z;3B9IF;3CW0X;3JCRS;47Z48;4911Q;4MKGV;4N9QI	adenylate kinase 9 [Source:HGNC Symbol;Acc:HGNC:33814]	221264	Q5TCS8	GO:0006139//nucleobase-containing compound metabolic process;GO:0006174//dADP phosphorylation;GO:0006186//dGDP phosphorylation;GO:0006756//AMP phosphorylation;GO:0006757//ATP generation from ADP;GO:0009117//nucleotide metabolic process;GO:0009123//nucleoside monophosphate metabolic process;GO:0016310//phosphorylation;GO:0061508//CDP phosphorylation;GO:0061565//dAMP phosphorylation;GO:0061566//CMP…	GO:0005634//nucleus;GO:0005654//nucleoplasm;GO:0005737//cytoplasm;GO:0005739//mitochondrion;GO:0005829//cytosol;GO:0031965//nuclear membrane;	GO:0000166//nucleotide binding;GO:0004017//adenylate kinase activity;GO:0004550//nucleoside diphosphate kinase activity;GO:0005524//ATP binding;GO:0016301//kinase activity;GO:0016740//transferase activity;GO:0016776//phosphotransferase activity, phosphate group as acceptor;GO:0019205//nucleobase-containing compound kinase activity;GO:0050145//nucleoside monophosphate kinase activity;	ko00240(Pyrimidine metabolism);ko00230(Purine metabolism)	AK9
ENSG00000119403	869.687	11.8114	9.99716263509378	11.0837449443485	3.36926510022948	3.24722308583425	5.20332276988909	0.3537	-1.499	2.8e-14	2.139e-12	Down Regulation	9	120855651	120894896	-	6594	PHF19	GO:0000122;GO:0003677;GO:0003682;GO:0005515;GO:0005634;GO:0005654;GO:0006325;GO:0006355;GO:0019827;GO:0035064;GO:0035098;GO:0046872;GO:0048863;GO:0061087	K11486	-	S;K	KOG4323;35NSN;38EMK;3BHNX;3CUD5;3J65F;484QG;48XQ9;4MHP0;4MWIN	PHD finger protein 19 [Source:HGNC Symbol;Acc:HGNC:24566]	26147	Q5T6S3	GO:0000122//negative regulation of transcription by RNA polymerase II;GO:0006325//chromatin organization;GO:0006355//regulation of transcription, DNA-templated;GO:0019827//stem cell population maintenance;GO:0048863//stem cell differentiation;GO:0061087//positive regulation of histone H3-K27 methylation;	GO:0005634//nucleus;GO:0005654//nucleoplasm;GO:0035098//ESC/E(Z) complex;	GO:0003677//DNA binding;GO:0003682//chromatin binding;GO:0005515//protein binding;GO:0035064//methylated histone binding;GO:0046872//metal ion binding;	-	PHF19
ENSG00000173207	2242.27	73.2247314032412	65.508046349835	72.0790749705852	36.1169503321765	36.5766848585257	41.5617008691679	0.5353	-0.9015	2.855e-14	2.17e-12	Nodiff	1	154974653	154979251	+	2340	CKS1B	GO:0000307;GO:0005515;GO:0005654;GO:0006355;GO:0007049;GO:0007346;GO:0016301;GO:0016310;GO:0016538;GO:0019005;GO:0019901;GO:0042393;GO:0043130;GO:0044772;GO:0045737;GO:0048144;GO:0050790;GO:0051301;GO:0061575	K02219	-	D	KOG3484;35QQQ;3A5MN;3BSNY;3D97K;3JHEW;48G04;49C2K;4MK0H;4N7DH	CDC28 protein kinase regulatory subunit 1B [Source:HGNC Symbol;Acc:HGNC:19083]	1163	P61024;Q5T178	GO:0006355//regulation of transcription, DNA-templated;GO:0007049//cell cycle;GO:0007346//regulation of mitotic cell cycle;GO:0016310//phosphorylation;GO:0044772//mitotic cell cycle phase transition;GO:0045737//positive regulation of cyclin-dependent protein serine/threonine kinase activity;GO:0048144//fibroblast proliferation;GO:0050790//regulation of catalytic activity;GO:0051301//cell division;	GO:0000307//cyclin-dependent protein kinase holoenzyme complex;GO:0005654//nucleoplasm;GO:0019005//SCF ubiquitin ligase complex;	GO:0005515//protein binding;GO:0016301//kinase activity;GO:0016538//cyclin-dependent protein serine/threonine kinase regulator activity;GO:0019901//protein kinase binding;GO:0042393//histone binding;GO:0043130//ubiquitin binding;GO:0061575//cyclin-dependent protein serine/threonine kinase activator activity;	ko05222(Small cell lung cancer);ko05200(Pathways in cancer)	CKS1B
ENSG00000140044	371.557	0.912263860024195	1.23806132930762	1.0469666519755	5.99329114643905	7.83708261262721	3.10181264661401	5.2934	2.4042	3.408e-14	2.577e-12	Up Regulation	14	75427716	75474111	+	6259	JDP2	GO:0000122;GO:0000785;GO:0000978;GO:0000981;GO:0001227;GO:0003677;GO:0003682;GO:0003700;GO:0005515;GO:0005634;GO:0006355;GO:0006357;GO:0031063;GO:0031065;GO:0035497;GO:0042803;GO:0043522;GO:0045444;GO:0045599;GO:0046982;GO:0090575;GO:1990837	K09033	-	K	KOG1414;35IEP;39HWW;3BF7C;3CV06;3J4RA;48B60;48WU9;4MI0E;4N62J	Jun dimerization protein 2 [Source:HGNC Symbol;Acc:HGNC:17546]	122953	Q8WYK2;A0A024R6D7	GO:0000122//negative regulation of transcription by RNA polymerase II;GO:0006355//regulation of transcription, DNA-templated;GO:0006357//regulation of transcription by RNA polymerase II;GO:0031063//regulation of histone deacetylation;GO:0031065//positive regulation of histone deacetylation;GO:0045444//fat cell differentiation;GO:0045599//negative regulation of fat cell differentiation;	GO:0000785//chromatin;GO:0005634//nucleus;GO:0090575//RNA polymerase II transcription regulator complex;	GO:0000978//RNA polymerase II cis-regulatory region sequence-specific DNA binding;GO:0000981//DNA-binding transcription factor activity, RNA polymerase II-specific;GO:0001227//DNA-binding transcription repressor activity, RNA polymerase II-specific;GO:0003677//DNA binding;GO:0003682//chromatin binding;GO:0003700//DNA-binding transcription factor activity;GO:0005515//protein binding;GO:0035497//cA…	-	JDP2
ENSG00000128165	224.273	0.583894693881475	0.661616097398017	0.894689070209888	6.11706176799667	7.06673361624268	2.40560352944826	7.2829	2.8645	3.597e-14	2.706e-12	Up Regulation	22	50481543	50486440	+	4289	ADM2	GO:0001525;GO:0003073;GO:0005179;GO:0005576;GO:0006468;GO:0007189;GO:0007586;GO:0007631;GO:0010460;GO:0010628;GO:0044877;GO:0045766;GO:0045776	K25343	-	S;T	2S7F2;35QU2;3A8JQ;3BU2G;3DB3H;3JH4E;48FEY;49C50;4MN84;4N7Z2	adrenomedullin 2 [Source:HGNC Symbol;Acc:HGNC:28898]	79924	Q7Z4H4	GO:0001525//angiogenesis;GO:0003073//regulation of systemic arterial blood pressure;GO:0006468//protein phosphorylation;GO:0007189//adenylate cyclase-activating G protein-coupled receptor signaling pathway;GO:0007586//digestion;GO:0007631//feeding behavior;GO:0010460//positive regulation of heart rate;GO:0010628//positive regulation of gene expression;GO:0045766//positive regulation of angiogenes…	GO:0005576//extracellular region;	GO:0005179//hormone activity;GO:0044877//protein-containing complex binding;	ko04270(Vascular smooth muscle contraction);ko04080(Neuroactive ligand-receptor interaction)	ADM2
ENSG00000163814	1466.06	20.0253593670375	16.5523007954557	18.6867810732075	5.54955028055183	8.29368840543657	7.12950605056929	0.3758	-1.412	3.878e-14	2.902e-12	Down Regulation	3	45082277	45146422	-	6508	CDCP1	GO:0005515;GO:0005576;GO:0005886;GO:0016020;GO:0016021	K06732	-	S	2QVKN;35G9B;38FZ0;3BGY2;3CVN3;3J23P;480B9;493IS;4MBBF;4MYS5	CUB domain containing protein 1 [Source:HGNC Symbol;Acc:HGNC:24357]	64866	Q9H5V8	-	GO:0005576//extracellular region;GO:0005886//plasma membrane;GO:0016020//membrane;GO:0016021//integral component of membrane;	GO:0005515//protein binding;	-	CDCP1
ENSG00000123374	456.842	9.92194362430867	9.08340139125409	9.85700501855299	3.13071120165988	3.14344992561051	4.72765034545265	0.3756	-1.413	3.947e-14	2.939e-12	Down Regulation	12	55966781	55972789	+	3887	CDK2	GO:0000082;GO:0000086;GO:0000122;GO:0000166;GO:0000287;GO:0000307;GO:0000781;GO:0000793;GO:0000805;GO:0000806;GO:0001673;GO:0004672;GO:0004674;GO:0004693;GO:0005515;GO:0005524;GO:0005634;GO:0005654;GO:0005667;GO:0005737;GO:0005768;GO:0005813;GO:0005815;GO:0005829;GO:0005856;GO:0006260;GO:0006281;GO:0006351;GO:0006468;GO:0006813;GO:0006974;GO:0007049;GO:0007099;GO:0007165;GO:0007265;GO:0008284;GO:…	K02206	EC:2.7.11.22	T;D;G	KOG0594;35JV2;38B58;3BC86;3CR7X;3JEBE;4826R;492HR;4MIM7;4MYIK	cyclin dependent kinase 2 [Source:HGNC Symbol;Acc:HGNC:1771]	1017	P24941;A0A024RB77	GO:0000082//G1/S transition of mitotic cell cycle;GO:0000086//G2/M transition of mitotic cell cycle;GO:0000122//negative regulation of transcription by RNA polymerase II;GO:0006260//DNA replication;GO:0006281//DNA repair;GO:0006351//transcription, DNA-templated;GO:0006468//protein phosphorylation;GO:0006813//potassium ion transport;GO:0006974//cellular response to DNA damage stimulus;GO:0007049//…	GO:0000307//cyclin-dependent protein kinase holoenzyme complex;GO:0000781//chromosome, telomeric region;GO:0000793//condensed chromosome;GO:0000805//X chromosome;GO:0000806//Y chromosome;GO:0001673//male germ cell nucleus;GO:0005634//nucleus;GO:0005654//nucleoplasm;GO:0005667//transcription regulator complex;GO:0005737//cytoplasm;GO:0005768//endosome;GO:0005813//centrosome;GO:0005815//microtubule…	GO:0000166//nucleotide binding;GO:0000287//magnesium ion binding;GO:0004672//protein kinase activity;GO:0004674//protein serine/threonine kinase activity;GO:0004693//cyclin-dependent protein serine/threonine kinase activity;GO:0005515//protein binding;GO:0005524//ATP binding;GO:0016301//kinase activity;GO:0016740//transferase activity;GO:0019904//protein domain specific binding;GO:0030332//cyclin…	ko05226(Gastric cancer);ko05222(Small cell lung cancer);ko05215(Prostate cancer);ko05203(Viral carcinogenesis);ko05200(Pathways in cancer);ko05169(Epstein-Barr virus infection);ko05166(Human T-cell leukemia virus 1 infection);ko05165(Human papillomavirus infection);ko05162(Measles);ko05161(Hepatitis B);ko05160(Hepatitis C);ko04934(Cushing syndrome);ko04914(Progesterone-mediated oocyte maturation)…	CDK2
ENSG00000129195	285.864	8.86407257288906	8.25290159687619	9.98351548454437	2.11550693359253	1.82372710017483	3.62333939211157	0.2744	-1.866	4.051e-14	2.987e-12	Down Regulation	17	6444441	6451469	+	2797	PIMREG	GO:0005515;GO:0005634;GO:0005654;GO:0005730;GO:0007049;GO:0051301	-	-	S	2S0SN;35FY7;39YVT;3BNQP;3D31T;3JCBR;484WG;48UYI;4MIGI;4N253	PICALM interacting mitotic regulator [Source:HGNC Symbol;Acc:HGNC:25483]	54478	Q9BSJ6;A0A0S2Z5F0	GO:0007049//cell cycle;GO:0051301//cell division;	GO:0005634//nucleus;GO:0005654//nucleoplasm;GO:0005730//nucleolus;	GO:0005515//protein binding;	-	PIMREG
ENSG00000140682	132.606	1.9467263069854	2.07051155895129	2.11973506426134	0.80586202227649	0.735518671465169	0.644070313396792	0.3533	-1.501	4.052e-14	2.987e-12	Down Regulation	16	31471585	31477960	+	5403	TGFB1I1	GO:0003712;GO:0003713;GO:0005515;GO:0005634;GO:0005737;GO:0005829;GO:0005856;GO:0005886;GO:0005925;GO:0006354;GO:0007155;GO:0008285;GO:0010718;GO:0016055;GO:0016331;GO:0016363;GO:0030154;GO:0030511;GO:0030512;GO:0030579;GO:0030855;GO:0045165;GO:0045444;GO:0045599;GO:0045893;GO:0046872;GO:0048495;GO:0050681;GO:0062023;GO:0070161;GO:0070411	K24315	-	Z;O;T;K	KOG1703;359U6;38H3P;3B96I;3CSTY;3JC6A;484UX;495QN;4MKXD;4MX0V	transforming growth factor beta 1 induced transcript 1 [Source:HGNC Symbol;Acc:HGNC:11767]	7041	O43294	GO:0006354//DNA-templated transcription, elongation;GO:0007155//cell adhesion;GO:0008285//negative regulation of cell population proliferation;GO:0010718//positive regulation of epithelial to mesenchymal transition;GO:0016055//Wnt signaling pathway;GO:0016331//morphogenesis of embryonic epithelium;GO:0030154//cell differentiation;GO:0030511//positive regulation of transforming growth factor beta …	GO:0005634//nucleus;GO:0005737//cytoplasm;GO:0005829//cytosol;GO:0005856//cytoskeleton;GO:0005886//plasma membrane;GO:0005925//focal adhesion;GO:0016363//nuclear matrix;GO:0062023//collagen-containing extracellular matrix;GO:0070161//anchoring junction;	GO:0003712//transcription coregulator activity;GO:0003713//transcription coactivator activity;GO:0005515//protein binding;GO:0046872//metal ion binding;GO:0048495//Roundabout binding;GO:0050681//androgen receptor binding;GO:0070411//I-SMAD binding;	-	TGFB1I1
ENSG00000197467	42.0127	0.548344542704429	0.232336400016817	0.405232550242668	0.0145507278797191	0.0154609982658334	0.0106092772651849	0.03376	-4.889	4.321e-14	3.169e-12	Down Regulation	10	69801880	69964275	+	11509	COL13A1	GO:0001501;GO:0001503;GO:0001763;GO:0001958;GO:0005201;GO:0005515;GO:0005576;GO:0005581;GO:0005600;GO:0005615;GO:0005788;GO:0005886;GO:0005911;GO:0007155;GO:0007160;GO:0008201;GO:0016020;GO:0016021;GO:0030020;GO:0030154;GO:0030198;GO:0030199;GO:0030903;GO:0031012;GO:0045202;GO:0045211;GO:0062023;GO:0098609	K16617	-	W;D	KOG3544;35H61;38G8F;3BG4N;3CWBZ;3J1RZ;4852Y;48ZID;4M6HC;4N1ME	collagen type XIII alpha 1 chain [Source:HGNC Symbol;Acc:HGNC:2190]	1305	Q5TAT6	GO:0001501//skeletal system development;GO:0001503//ossification;GO:0001763//morphogenesis of a branching structure;GO:0001958//endochondral ossification;GO:0007155//cell adhesion;GO:0007160//cell-matrix adhesion;GO:0030154//cell differentiation;GO:0030198//extracellular matrix organization;GO:0030199//collagen fibril organization;GO:0030903//notochord development;GO:0098609//cell-cell adhesion;	GO:0005576//extracellular region;GO:0005581//collagen trimer;GO:0005600//collagen type XIII trimer;GO:0005615//extracellular space;GO:0005788//endoplasmic reticulum lumen;GO:0005886//plasma membrane;GO:0005911//cell-cell junction;GO:0016020//membrane;GO:0016021//integral component of membrane;GO:0031012//extracellular matrix;GO:0045202//synapse;GO:0045211//postsynaptic membrane;GO:0062023//collag…	GO:0005201//extracellular matrix structural constituent;GO:0005515//protein binding;GO:0008201//heparin binding;GO:0030020//extracellular matrix structural constituent conferring tensile strength;	ko04974(Protein digestion and absorption)	COL13A1
ENSG00000133119	715.69	27.2513950447841	18.5593518959693	22.1435568957506	4.33602526606329	4.15070280012775	8.26688953488804	0.2418	-2.048	4.379e-14	3.196e-12	Down Regulation	13	33818069	33966558	+	2858	RFC3	GO:0000731;GO:0003677;GO:0003689;GO:0005515;GO:0005634;GO:0005654;GO:0005663;GO:0006260;GO:0006261;GO:0006271;GO:0006281;GO:0008094;GO:0017116;GO:0031390;GO:0032508;GO:0046683;GO:1900264	K10756	-	L	KOG2035;35FCY;38FUD;3BA76;3CSEE;3J5SQ;47Z6G;48V7K;4MFXE;4N4AK	replication factor C subunit 3 [Source:HGNC Symbol;Acc:HGNC:9971]	5983	P40938;A0A024RDQ8	GO:0000731//DNA synthesis involved in DNA repair;GO:0006260//DNA replication;GO:0006261//DNA-dependent DNA replication;GO:0006271//DNA strand elongation involved in DNA replication;GO:0006281//DNA repair;GO:0032508//DNA duplex unwinding;GO:0046683//response to organophosphorus;GO:1900264//positive regulation of DNA-directed DNA polymerase activity;	GO:0005634//nucleus;GO:0005654//nucleoplasm;GO:0005663//DNA replication factor C complex;GO:0031390//Ctf18 RFC-like complex;	GO:0003677//DNA binding;GO:0003689//DNA clamp loader activity;GO:0005515//protein binding;GO:0008094//ATP-dependent activity, acting on DNA;GO:0017116//single-stranded DNA helicase activity;	ko03430(Mismatch repair);ko03420(Nucleotide excision repair);ko03030(DNA replication)	RFC3
ENSG00000168393	926.924	29.6259795029579	26.7962368805098	29.4563359238777	14.4730876057109	14.1670113159325	16.5670100044401	0.5198	-0.9439	4.664e-14	3.387e-12	Nodiff	2	241675747	241686944	-	2399	DTYMK	GO:0000166;GO:0004550;GO:0004798;GO:0005524;GO:0005634;GO:0005737;GO:0005739;GO:0005829;GO:0006227;GO:0006233;GO:0006235;GO:0009041;GO:0009165;GO:0016301;GO:0016310;GO:0016740;GO:0046105;GO:0046940;GO:0071363	K00943	EC:2.7.4.9	F	KOG3327;35DJR;39U2H;3BEIK;3D1F2;3JE83;48350;49832;4M8DS;4N527	deoxythymidylate kinase [Source:HGNC Symbol;Acc:HGNC:3061]	1841	P23919;Q6FGU2	GO:0006227//dUDP biosynthetic process;GO:0006233//dTDP biosynthetic process;GO:0006235//dTTP biosynthetic process;GO:0009165//nucleotide biosynthetic process;GO:0016310//phosphorylation;GO:0046105//thymidine biosynthetic process;GO:0046940//nucleoside monophosphate phosphorylation;GO:0071363//cellular response to growth factor stimulus;	GO:0005634//nucleus;GO:0005737//cytoplasm;GO:0005739//mitochondrion;GO:0005829//cytosol;	GO:0000166//nucleotide binding;GO:0004550//nucleoside diphosphate kinase activity;GO:0004798//thymidylate kinase activity;GO:0005524//ATP binding;GO:0009041//uridylate kinase activity;GO:0016301//kinase activity;GO:0016740//transferase activity;	ko00240(Pyrimidine metabolism)	DTYMK
ENSG00000029993	5353.44	118.139613315668	98.0151636896784	106.155686368273	46.1518108256376	38.7947547561046	56.590020462354	0.4324	-1.209	5.056e-14	3.653e-12	Down Regulation	X	150980509	150990771	+	3914	HMGB3	GO:0000400;GO:0002376;GO:0003677;GO:0003690;GO:0003723;GO:0005515;GO:0005634;GO:0005694;GO:0005737;GO:0006310;GO:0006357;GO:0008301;GO:0032392;GO:0045087	K11296	-	K;B	KOG0381;35GVQ;3A6QT;3BB0Q;3D0S7;3J706;484ZM;48XDK;4MF9B;4N2TN	high mobility group box 3 [Source:HGNC Symbol;Acc:HGNC:5004]	3149	O15347	GO:0002376//immune system process;GO:0006310//DNA recombination;GO:0006357//regulation of transcription by RNA polymerase II;GO:0032392//DNA geometric change;GO:0045087//innate immune response;	GO:0005634//nucleus;GO:0005694//chromosome;GO:0005737//cytoplasm;	GO:0000400//four-way junction DNA binding;GO:0003677//DNA binding;GO:0003690//double-stranded DNA binding;GO:0003723//RNA binding;GO:0005515//protein binding;GO:0008301//DNA binding, bending;	-	HMGB3
ENSG00000196141	4294.1	33.886122160206	27.7055581049877	30.6445790851041	14.9419684114669	15.1220311998321	16.9550657919579	0.5032	-0.9908	5.079e-14	3.653e-12	Nodiff	2	200305881	200482264	+	10453	SPATS2L	GO:0003723;GO:0005515;GO:0005634;GO:0005654;GO:0005730;GO:0005737;GO:0005829;GO:0032991	-	-	S	2S51R;35HDD;392BJ;3BINC;3D3C1;3J8EA;480SC;490WA;4M77T;4MTAG	spermatogenesis associated serine rich 2 like [Source:HGNC Symbol;Acc:HGNC:24574]	26010	Q9NUQ6;A0A024R3V0	-	GO:0005634//nucleus;GO:0005654//nucleoplasm;GO:0005730//nucleolus;GO:0005737//cytoplasm;GO:0005829//cytosol;GO:0032991//protein-containing complex;	GO:0003723//RNA binding;GO:0005515//protein binding;	-	SPATS2L
ENSG00000145390	811.093	1.43355749432374	1.6258377483463	1.55136113939227	5.22289501976385	8.84565517203423	4.32758137593631	3.9823	1.9936	5.271e-14	3.761e-12	Up Regulation	4	119212587	119295518	+	11949	USP53	GO:0001508;GO:0004843;GO:0005515;GO:0005575;GO:0005911;GO:0005923;GO:0007605;GO:0008150;GO:0010996;GO:0016579;GO:0051402;GO:0070161;GO:1904019;GO:1905584	-	-	S;O	KOG1887;35D2X;38CTI;3BAQG;3CSHJ;3JEV5;4854S;4931C;4M7YN;4MTHR	ubiquitin specific peptidase 53 [Source:HGNC Symbol;Acc:HGNC:29255]	54532	Q70EK8;Q9H9I0	GO:0001508//action potential;GO:0007605//sensory perception of sound;GO:0008150//biological_process;GO:0010996//response to auditory stimulus;GO:0016579//protein deubiquitination;GO:0051402//neuron apoptotic process;GO:1904019//epithelial cell apoptotic process;GO:1905584//outer hair cell apoptotic process;	GO:0005575//cellular_component;GO:0005911//cell-cell junction;GO:0005923//bicellular tight junction;GO:0070161//anchoring junction;	GO:0004843//thiol-dependent deubiquitinase;GO:0005515//protein binding;	-	USP53
ENSG00000198722	2344.36	5.01424181497416	5.35651161209798	5.16191671782494	10.0297823343685	10.1836485073989	8.78440249469566	1.8507	0.8881	5.28e-14	3.761e-12	Nodiff	9	35161992	35405338	+	17910	UNC13B	GO:0005509;GO:0005515;GO:0005516;GO:0005543;GO:0005737;GO:0005794;GO:0005829;GO:0005886;GO:0006887;GO:0007268;GO:0007528;GO:0010808;GO:0016020;GO:0016081;GO:0016082;GO:0016188;GO:0017075;GO:0019992;GO:0030672;GO:0030742;GO:0031267;GO:0031594;GO:0035249;GO:0042734;GO:0043065;GO:0043195;GO:0045202;GO:0046872;GO:0048786;GO:0050714;GO:0060478;GO:0061789;GO:0070161;GO:0071333;GO:0097151;GO:0098793;GO:…	K15293	-	S;T;U	KOG1011;35D8J;38CHS;3BCSX;3CT96;3J8GI;4826H;48VZI;4MF3Q;4N5NU	unc-13 homolog B [Source:HGNC Symbol;Acc:HGNC:12566]	10497	O14795;Q4LE73	GO:0006887//exocytosis;GO:0007268//chemical synaptic transmission;GO:0007528//neuromuscular junction development;GO:0010808//positive regulation of synaptic vesicle priming;GO:0016081//synaptic vesicle docking;GO:0016082//synaptic vesicle priming;GO:0016188//synaptic vesicle maturation;GO:0035249//synaptic transmission, glutamatergic;GO:0043065//positive regulation of apoptotic process;GO:0050714…	GO:0005737//cytoplasm;GO:0005794//Golgi apparatus;GO:0005829//cytosol;GO:0005886//plasma membrane;GO:0016020//membrane;GO:0030672//synaptic vesicle membrane;GO:0031594//neuromuscular junction;GO:0042734//presynaptic membrane;GO:0043195//terminal bouton;GO:0045202//synapse;GO:0048786//presynaptic active zone;GO:0070161//anchoring junction;GO:0098793//presynapse;GO:0098831//presynaptic active zone …	GO:0005509//calcium ion binding;GO:0005515//protein binding;GO:0005516//calmodulin binding;GO:0005543//phospholipid binding;GO:0017075//syntaxin-1 binding;GO:0019992//diacylglycerol binding;GO:0030742//GTP-dependent protein binding;GO:0031267//small GTPase binding;GO:0046872//metal ion binding;	ko04721(Synaptic vesicle cycle)	UNC13B
ENSG00000152409	1061.82	2.95144645414006	3.7856257182743	3.35548199587531	10.2670704834191	11.9266128157747	7.38975876327832	2.9187	1.5453	5.567e-14	3.94e-12	Up Regulation	5	79236131	79327211	+	9096	JMY	GO:0000421;GO:0003713;GO:0003779;GO:0005515;GO:0005634;GO:0005654;GO:0005737;GO:0005856;GO:0006281;GO:0006357;GO:0006974;GO:0008017;GO:0009267;GO:0012505;GO:0016020;GO:0031252;GO:0031410;GO:0034314;GO:0043065;GO:0045893;GO:0051091;GO:0070060;GO:0070358;GO:0071933;GO:0072332	K24045	-	S;Z	2QRHU;35DFJ;38BG1;3BCMN;3CUCY;3J202;489E8;491N4;4MAK9;4N5YA	junction mediating and regulatory protein, p53 cofactor [Source:HGNC Symbol;Acc:HGNC:28916]	133746	Q8N9B5	GO:0006281//DNA repair;GO:0006357//regulation of transcription by RNA polymerase II;GO:0006974//cellular response to DNA damage stimulus;GO:0009267//cellular response to starvation;GO:0034314//Arp2/3 complex-mediated actin nucleation;GO:0043065//positive regulation of apoptotic process;GO:0045893//positive regulation of transcription, DNA-templated;GO:0051091//positive regulation of DNA-binding t…	GO:0000421//autophagosome membrane;GO:0005634//nucleus;GO:0005654//nucleoplasm;GO:0005737//cytoplasm;GO:0005856//cytoskeleton;GO:0012505//endomembrane system;GO:0016020//membrane;GO:0031252//cell leading edge;GO:0031410//cytoplasmic vesicle;	GO:0003713//transcription coactivator activity;GO:0003779//actin binding;GO:0005515//protein binding;GO:0008017//microtubule binding;GO:0071933//Arp2/3 complex binding;	-	JMY
ENSG00000147251	164.142	0.65515833757534	0.802037105362257	0.485890651741717	2.16591134490836	2.21423279328508	1.89326560122705	3.1953	1.676	5.586e-14	3.94e-12	Up Regulation	X	118495815	118686163	+	6804	DOCK11	GO:0001782;GO:0002315;GO:0005085;GO:0005515;GO:0005829;GO:0007264;GO:0031267;GO:0043547;GO:0050790;GO:0051491	K21853	-	Z;T	KOG1997;35CTJ;38C96;3BA61;3CR5D;3JD2H;47ZYV;497ZD;4M871;4MTH0	dedicator of cytokinesis 11 [Source:HGNC Symbol;Acc:HGNC:23483]	139818	Q5JSL3	GO:0001782//B cell homeostasis;GO:0002315//marginal zone B cell differentiation;GO:0007264//small GTPase mediated signal transduction;GO:0043547//positive regulation of GTPase activity;GO:0050790//regulation of catalytic activity;GO:0051491//positive regulation of filopodium assembly;	GO:0005829//cytosol;	GO:0005085//guanyl-nucleotide exchange factor activity;GO:0005515//protein binding;GO:0031267//small GTPase binding;	-	DOCK11
ENSG00000152377	220.014	2.96479688237147	3.08059864953174	2.72326036409241	1.00838734638608	0.899269845693484	1.36872596082716	0.3683	-1.441	5.682e-14	3.989e-12	Down Regulation	5	136975298	137598379	-	6200	SPOCK1	GO:0001558;GO:0001764;GO:0004867;GO:0004869;GO:0005509;GO:0005515;GO:0005576;GO:0005615;GO:0005737;GO:0007155;GO:0007399;GO:0008191;GO:0010812;GO:0010951;GO:0010977;GO:0014069;GO:0016528;GO:0021953;GO:0022008;GO:0031594;GO:0033268	K08136	-	S;I	KOG3555;359GH;38URE;3BD7M;3CU13;3J5KT;487GE;493WF;4MFW3;4MXMK	SPARC (osteonectin), cwcv and kazal like domains proteoglycan 1 [Source:HGNC Symbol;Acc:HGNC:11251]	6695	Q08629	GO:0001558//regulation of cell growth;GO:0001764//neuron migration;GO:0007155//cell adhesion;GO:0007399//nervous system development;GO:0010812//negative regulation of cell-substrate adhesion;GO:0010951//negative regulation of endopeptidase activity;GO:0010977//negative regulation of neuron projection development;GO:0021953//central nervous system neuron differentiation;GO:0022008//neurogenesis;	GO:0005576//extracellular region;GO:0005615//extracellular space;GO:0005737//cytoplasm;GO:0014069//postsynaptic density;GO:0016528//sarcoplasm;GO:0031594//neuromuscular junction;GO:0033268//node of Ranvier;	GO:0004867//serine-type endopeptidase inhibitor activity;GO:0004869//cysteine-type endopeptidase inhibitor activity;GO:0005509//calcium ion binding;GO:0005515//protein binding;GO:0008191//metalloendopeptidase inhibitor activity;	-	SPOCK1
ENSG00000130669	2858.84	29.4269572033925	27.9039382453129	29.3640533033568	16.0994668375076	15.5362892558394	18.3299416138549	0.5693	-0.8126	5.749e-14	4.017e-12	Nodiff	19	39125770	39182816	+	7101	PAK4	GO:0000166;GO:0001558;GO:0004672;GO:0004674;GO:0005515;GO:0005524;GO:0005737;GO:0005794;GO:0005829;GO:0005912;GO:0005925;GO:0006468;GO:0006915;GO:0007010;GO:0007049;GO:0007165;GO:0016043;GO:0016301;GO:0016310;GO:0016477;GO:0016740;GO:0035556;GO:0043408;GO:0045766;GO:0060996;GO:0071407;GO:0098609;GO:0098641;GO:0106310;GO:2000352	K05734	EC:2.7.11.1	F;T	KOG0578;35I86;38BDT;3BA4Y;3CS12;3JDEB;486BD;48Y0V;4MIAE;4MZCZ	p21 (RAC1) activated kinase 4 [Source:HGNC Symbol;Acc:HGNC:16059]	10298	O96013;A0A024R0J1	GO:0001558//regulation of cell growth;GO:0006468//protein phosphorylation;GO:0006915//apoptotic process;GO:0007010//cytoskeleton organization;GO:0007049//cell cycle;GO:0007165//signal transduction;GO:0016043//cellular component organization;GO:0016310//phosphorylation;GO:0016477//cell migration;GO:0035556//intracellular signal transduction;GO:0043408//regulation of MAPK cascade;GO:0045766//positi…	GO:0005737//cytoplasm;GO:0005794//Golgi apparatus;GO:0005829//cytosol;GO:0005912//adherens junction;GO:0005925//focal adhesion;	GO:0000166//nucleotide binding;GO:0004672//protein kinase activity;GO:0004674//protein serine/threonine kinase activity;GO:0005515//protein binding;GO:0005524//ATP binding;GO:0016301//kinase activity;GO:0016740//transferase activity;GO:0098641//cadherin binding involved in cell-cell adhesion;GO:0106310//protein serine kinase activity;	ko05211(Renal cell carcinoma);ko05206(MicroRNAs in cancer);ko05170(Human immunodeficiency virus 1 infection);ko04810(Regulation of actin cytoskeleton);ko04660(T cell receptor signaling pathway);ko04510(Focal adhesion);ko04360(Axon guidance);ko04014(Ras signaling pathway);ko04012(ErbB signaling pathway)	PAK4
ENSG00000131051	7824.35	28.9124600840195	27.8321933013625	28.6944927815367	46.2552489883023	44.3588422990486	46.3211221408444	1.5849	0.6644	5.849e-14	4.068e-12	Nodiff	20	35701347	35742312	-	11974	RBM39	GO:0003676;GO:0003723;GO:0005515;GO:0005634;GO:0005654;GO:0006396;GO:0006397;GO:0008380;GO:0015630;GO:0016607;GO:0032991;GO:0034451;GO:0048024;GO:0050733	K13091	-	A;S;K	KOG0147;35P9F;39R6Y;3BANI;3CXB8;3JDR6;4812T;493TA;4M83Y;4N4TJ	RNA binding motif protein 39 [Source:HGNC Symbol;Acc:HGNC:15923]	9584	Q14498;A0A384NQ03	GO:0006396//RNA processing;GO:0006397//mRNA processing;GO:0008380//RNA splicing;GO:0048024//regulation of mRNA splicing, via spliceosome;	GO:0005634//nucleus;GO:0005654//nucleoplasm;GO:0015630//microtubule cytoskeleton;GO:0016607//nuclear speck;GO:0032991//protein-containing complex;GO:0034451//centriolar satellite;	GO:0003676//nucleic acid binding;GO:0003723//RNA binding;GO:0005515//protein binding;GO:0050733//RS domain binding;	-	RBM39
ENSG00000184500	913.836	6.45326841843318	7.1966926434439	6.92297369399057	12.9543878637623	11.446275758076	14.1448531372828	1.8526	0.8895	6.06e-14	4.195e-12	Nodiff	3	93873051	93980003	-	5270	PROS1	GO:0000139;GO:0004866;GO:0005509;GO:0005515;GO:0005576;GO:0005615;GO:0005783;GO:0005789;GO:0005796;GO:0005886;GO:0007596;GO:0007599;GO:0010951;GO:0030195;GO:0031093;GO:0042730;GO:0050896;GO:0070062;GO:0072562	K03908	-	O;T	2QSNF;35KJP;39A9H;3BJNX;3CU0B;3J6TA;47ZCS;495ZG;4MEPG;4MX6D	protein S [Source:HGNC Symbol;Acc:HGNC:9456]	5627	P07225;A0A0S2Z4K3	GO:0007596//blood coagulation;GO:0007599//hemostasis;GO:0010951//negative regulation of endopeptidase activity;GO:0030195//negative regulation of blood coagulation;GO:0042730//fibrinolysis;GO:0050896//response to stimulus;	GO:0000139//Golgi membrane;GO:0005576//extracellular region;GO:0005615//extracellular space;GO:0005783//endoplasmic reticulum;GO:0005789//endoplasmic reticulum membrane;GO:0005796//Golgi lumen;GO:0005886//plasma membrane;GO:0031093//platelet alpha granule lumen;GO:0070062//extracellular exosome;GO:0072562//blood microparticle;	GO:0004866//endopeptidase inhibitor activity;GO:0005509//calcium ion binding;GO:0005515//protein binding;	ko04610(Complement and coagulation cascades)	PROS1
ENSG00000145246	512.368	2.43589331842158	2.66081288648808	2.51593667879799	4.84186990891785	4.43847896455927	4.98938431770797	1.8544	0.8909	6.091e-14	4.196e-12	Nodiff	4	47485275	47593486	+	7978	ATP10D	GO:0000166;GO:0000287;GO:0005215;GO:0005515;GO:0005524;GO:0005654;GO:0005783;GO:0005789;GO:0005886;GO:0005887;GO:0006812;GO:0006869;GO:0015914;GO:0016020;GO:0016021;GO:0016887;GO:0034220;GO:0045332;GO:0046872;GO:0140326;GO:0140351;GO:1990531	K01530	EC:7.6.2.1	P	KOG0206;35K8S;38BZ2;3BC43;3CXRU;3JD18;4841X;48WBQ;4MCIB;4MV54	ATPase phospholipid transporting 10D (putative) [Source:HGNC Symbol;Acc:HGNC:13549]	57205	Q9P241	GO:0006812//cation transport;GO:0006869//lipid transport;GO:0015914//phospholipid transport;GO:0034220//ion transmembrane transport;GO:0045332//phospholipid translocation;	GO:0005654//nucleoplasm;GO:0005783//endoplasmic reticulum;GO:0005789//endoplasmic reticulum membrane;GO:0005886//plasma membrane;GO:0005887//integral component of plasma membrane;GO:0016020//membrane;GO:0016021//integral component of membrane;GO:1990531//phospholipid-translocating ATPase complex;	GO:0000166//nucleotide binding;GO:0000287//magnesium ion binding;GO:0005215//transporter activity;GO:0005515//protein binding;GO:0005524//ATP binding;GO:0016887//ATP hydrolysis activity;GO:0046872//metal ion binding;GO:0140326//ATPase-coupled intramembrane lipid transporter activity;GO:0140351//glycosylceramide flippase activity;	-	ATP10D
ENSG00000134324	4026.6	8.1542033631453	12.6339162267715	10.7161194371292	26.1340923688888	32.6947090653732	25.1904573808403	2.6564	1.4095	6.131e-14	4.204e-12	Up Regulation	2	11677595	11827409	+	11861	LPIN1	GO:0003713;GO:0005515;GO:0005634;GO:0005635;GO:0005654;GO:0005737;GO:0005741;GO:0005783;GO:0005789;GO:0005829;GO:0006357;GO:0006629;GO:0006631;GO:0006642;GO:0006654;GO:0007077;GO:0008195;GO:0009062;GO:0016020;GO:0016787;GO:0019432;GO:0031100;GO:0031642;GO:0031965;GO:0032869;GO:0044255;GO:0045740;GO:0045944;GO:0046473;GO:0120162;GO:1903741	K15728	EC:3.1.3.4	N;C;K;I	KOG2116;35JC5;38BJ2;3BD7H;3CVIX;3J24J;48BCR;495KZ;4MD9C;4MU7T	lipin 1 [Source:HGNC Symbol;Acc:HGNC:13345]	23175	Q14693	GO:0006357//regulation of transcription by RNA polymerase II;GO:0006629//lipid metabolic process;GO:0006631//fatty acid metabolic process;GO:0006642//triglyceride mobilization;GO:0006654//phosphatidic acid biosynthetic process;GO:0007077//mitotic nuclear membrane disassembly;GO:0009062//fatty acid catabolic process;GO:0019432//triglyceride biosynthetic process;GO:0031100//animal organ regeneratio…	GO:0005634//nucleus;GO:0005635//nuclear envelope;GO:0005654//nucleoplasm;GO:0005737//cytoplasm;GO:0005741//mitochondrial outer membrane;GO:0005783//endoplasmic reticulum;GO:0005789//endoplasmic reticulum membrane;GO:0005829//cytosol;GO:0016020//membrane;GO:0031965//nuclear membrane;	GO:0003713//transcription coactivator activity;GO:0005515//protein binding;GO:0008195//phosphatidate phosphatase activity;GO:0016787//hydrolase activity;	ko04936(Alcoholic liver disease);ko04150(mTOR signaling pathway);ko00564(Glycerophospholipid metabolism);ko00561(Glycerolipid metabolism)	LPIN1
ENSG00000128944	1167.58	28.9731896283509	23.0330474167216	27.856678988491	7.76304691235492	7.25371251143104	12.173877272345	0.3349	-1.578	6.276e-14	4.283e-12	Down Regulation	15	40382721	40394288	+	3696	KNSTRN	GO:0000070;GO:0000226;GO:0000775;GO:0000776;GO:0000922;GO:0001726;GO:0005515;GO:0005634;GO:0005694;GO:0005737;GO:0005815;GO:0005856;GO:0005874;GO:0005886;GO:0007049;GO:0007051;GO:0007059;GO:0016477;GO:0034451;GO:0035371;GO:0042803;GO:0051010;GO:0051301;GO:0051988;GO:0071364;GO:0072686	K26097	-	S	2S60X;35J0F;39WFW;3BNG7;3D083;3J3Z8;48AZU;49238;4M5KM;4N4QY	kinetochore localized astrin (SPAG5) binding protein [Source:HGNC Symbol;Acc:HGNC:30767]	90417	Q9Y448	GO:0000070//mitotic sister chromatid segregation;GO:0000226//microtubule cytoskeleton organization;GO:0007049//cell cycle;GO:0007051//spindle organization;GO:0007059//chromosome segregation;GO:0016477//cell migration;GO:0051301//cell division;GO:0051988//regulation of attachment of spindle microtubules to kinetochore;GO:0071364//cellular response to epidermal growth factor stimulus;	GO:0000775//chromosome, centromeric region;GO:0000776//kinetochore;GO:0000922//spindle pole;GO:0001726//ruffle;GO:0005634//nucleus;GO:0005694//chromosome;GO:0005737//cytoplasm;GO:0005815//microtubule organizing center;GO:0005856//cytoskeleton;GO:0005874//microtubule;GO:0005886//plasma membrane;GO:0034451//centriolar satellite;GO:0035371//microtubule plus-end;GO:0072686//mitotic spindle;	GO:0005515//protein binding;GO:0042803//protein homodimerization activity;GO:0051010//microtubule plus-end binding;	-	KNSTRN
ENSG00000257335	43.1683	0.0139555549849966	0.0405465623842095	0.016449070545171	0.331807589199468	0.633515133889657	0.323201625641578	18.196	4.1856	6.331e-14	4.301e-12	Up Regulation	7	141907813	142106747	+	10767	MGAM	GO:0000025;GO:0003824;GO:0004339;GO:0004553;GO:0004558;GO:0005515;GO:0005886;GO:0005975;GO:0005983;GO:0008152;GO:0016020;GO:0016021;GO:0016160;GO:0016324;GO:0016787;GO:0016798;GO:0030246;GO:0032450;GO:0070062;GO:0070821;GO:0090599;GO:0101003;GO:0110165;GO:1901027	K12047	-	G	KOG1065;359TD;38C0A;3BACU;3CTEG;3J7QD;4808H;48V6B;4M6RZ;4N2KQ	maltase-glucoamylase [Source:HGNC Symbol;Acc:HGNC:7043]	8972	O43451	GO:0000025//maltose catabolic process;GO:0005975//carbohydrate metabolic process;GO:0005983//starch catabolic process;GO:0008152//metabolic process;GO:1901027//dextrin catabolic process;	GO:0005886//plasma membrane;GO:0016020//membrane;GO:0016021//integral component of membrane;GO:0016324//apical plasma membrane;GO:0070062//extracellular exosome;GO:0070821//tertiary granule membrane;GO:0101003//ficolin-1-rich granule membrane;GO:0110165//cellular anatomical entity;	GO:0003824//catalytic activity;GO:0004339//glucan 1,4-alpha-glucosidase activity;GO:0004553//hydrolase activity, hydrolyzing O-glycosyl compounds;GO:0004558//alpha-1,4-glucosidase activity;GO:0005515//protein binding;GO:0016160//amylase activity;GO:0016787//hydrolase activity;GO:0016798//hydrolase activity, acting on glycosyl bonds;GO:0030246//carbohydrate binding;GO:0032450//maltose alpha-glucos…	ko04973(Carbohydrate digestion and absorption);ko00500(Starch and sucrose metabolism);ko00052(Galactose metabolism)	MGAM
ENSG00000150687	8961.69	56.4982924355508	54.1128295661593	53.8409427617737	32.827534715092	33.9275124579257	34.5319538468791	0.6093	-0.7149	6.37e-14	4.308e-12	Nodiff	11	86791059	86952910	+	11444	PRSS23	GO:0004252;GO:0005515;GO:0005576;GO:0005634;GO:0005788;GO:0006508;GO:0008233;GO:0008236;GO:0016787;GO:0070062	K09627	EC:3.4.21.-	O;M	2QTW6;35HWU;39RA4;3BF4M;3D1NG;3JCDP;47ZFB;495U9;4M6RU;4MUPI	serine protease 23 [Source:HGNC Symbol;Acc:HGNC:14370]	11098	O95084	GO:0006508//proteolysis;	GO:0005576//extracellular region;GO:0005634//nucleus;GO:0005788//endoplasmic reticulum lumen;GO:0070062//extracellular exosome;	GO:0004252//serine-type endopeptidase activity;GO:0005515//protein binding;GO:0008233//peptidase activity;GO:0008236//serine-type peptidase activity;GO:0016787//hydrolase activity;	-	PRSS23
ENSG00000204217	5251.17	13.9218158513043	18.1363671665304	15.8662613715436	35.2958328336951	28.9641001519281	31.0236401776503	1.9698	0.9781	6.531e-14	4.397e-12	Nodiff	2	202376327	202567751	+	12502	BMPR2	GO:0000166;GO:0001568;GO:0001649;GO:0001707;GO:0001893;GO:0001935;GO:0001938;GO:0001946;GO:0001974;GO:0002063;GO:0003085;GO:0003148;GO:0003151;GO:0003176;GO:0003177;GO:0003183;GO:0003186;GO:0003197;GO:0003252;GO:0004672;GO:0004674;GO:0004675;GO:0005024;GO:0005515;GO:0005524;GO:0005615;GO:0005654;GO:0005886;GO:0005887;GO:0005901;GO:0005905;GO:0005912;GO:0006468;GO:0007178;GO:0009267;GO:0009952;GO:…	K04671	EC:2.7.11.30	T;K;L	KOG3653;35BHF;39RAD;3BE0E;3CY4J;3J6M5;488IV;491N3;4MGUW;4MWPZ	bone morphogenetic protein receptor type 2 [Source:HGNC Symbol;Acc:HGNC:1078]	659	Q13873	GO:0001568//blood vessel development;GO:0001649//osteoblast differentiation;GO:0001707//mesoderm formation;GO:0001893//maternal placenta development;GO:0001935//endothelial cell proliferation;GO:0001938//positive regulation of endothelial cell proliferation;GO:0001946//lymphangiogenesis;GO:0001974//blood vessel remodeling;GO:0002063//chondrocyte development;GO:0003085//negative regulation of syst…	GO:0005615//extracellular space;GO:0005654//nucleoplasm;GO:0005886//plasma membrane;GO:0005887//integral component of plasma membrane;GO:0005901//caveola;GO:0005905//clathrin-coated pit;GO:0005912//adherens junction;GO:0009986//cell surface;GO:0014069//postsynaptic density;GO:0016020//membrane;GO:0016021//integral component of membrane;GO:0030424//axon;GO:0030425//dendrite;GO:0043235//receptor co…	GO:0000166//nucleotide binding;GO:0004672//protein kinase activity;GO:0004674//protein serine/threonine kinase activity;GO:0004675//transmembrane receptor protein serine/threonine kinase activity;GO:0005024//transforming growth factor beta-activated receptor activity;GO:0005515//protein binding;GO:0005524//ATP binding;GO:0016301//kinase activity;GO:0016362//activin receptor activity, type II;GO:0…	ko05418(Fluid shear stress and atherosclerosis);ko05206(MicroRNAs in cancer);ko04550(Signaling pathways regulating pluripotency of stem cells);ko04390(Hippo signaling pathway);ko04360(Axon guidance);ko04350(TGF-beta signaling pathway);ko04060(Cytokine-cytokine receptor interaction)	BMPR2
ENSG00000013810	1487.14	15.9084898148161	13.913185321236	14.6167745606529	3.3271477276753	3.11858175166176	6.2400090189576	0.2806	-1.834	6.989e-14	4.684e-12	Down Regulation	4	1712858	1745171	+	8825	TACC3	GO:0000226;GO:0000922;GO:0005515;GO:0005737;GO:0005815;GO:0005819;GO:0005829;GO:0005856;GO:0007049;GO:0007052;GO:0007091;GO:0008283;GO:0021987;GO:0034451;GO:0043231;GO:0051301;GO:0060236;GO:0072686;GO:1902850	K14283	-	S;Z	2QQ1G;35PJ3;39V0X;3BI43;3CTIW;3J4B8;48A1M;492R7;4M8XJ;4MXME	transforming acidic coiled-coil containing protein 3 [Source:HGNC Symbol;Acc:HGNC:11524]	10460	Q9Y6A5	GO:0000226//microtubule cytoskeleton organization;GO:0007049//cell cycle;GO:0007052//mitotic spindle organization;GO:0007091//metaphase/anaphase transition of mitotic cell cycle;GO:0008283//cell population proliferation;GO:0021987//cerebral cortex development;GO:0051301//cell division;GO:0060236//regulation of mitotic spindle organization;GO:1902850//microtubule cytoskeleton organization involved…	GO:0000922//spindle pole;GO:0005737//cytoplasm;GO:0005815//microtubule organizing center;GO:0005819//spindle;GO:0005829//cytosol;GO:0005856//cytoskeleton;GO:0034451//centriolar satellite;GO:0043231//intracellular membrane-bounded organelle;GO:0072686//mitotic spindle;	GO:0005515//protein binding;	-	TACC3
ENSG00000024526	2210.53	34.8246999462962	28.6994795790435	30.6577743387826	9.54939986672112	8.4690577169131	14.7147180572539	0.3418	-1.549	7.062e-14	4.711e-12	Down Regulation	1	68474152	68497221	-	5904	DEPDC1	GO:0005096;GO:0005515;GO:0005634;GO:0007165;GO:0017053;GO:0035556;GO:0045892;GO:0050790	-	-	S;T;K	2QR00;35DW2;38G0X;3BA2Y;3CSC0;3J1XI;48988;48ZQ7;4MDW6;4MSRK	DEP domain containing 1 [Source:HGNC Symbol;Acc:HGNC:22949]	55635	Q5TB30	GO:0007165//signal transduction;GO:0035556//intracellular signal transduction;GO:0045892//negative regulation of transcription, DNA-templated;GO:0050790//regulation of catalytic activity;	GO:0005634//nucleus;GO:0017053//transcription repressor complex;	GO:0005096//GTPase activator activity;GO:0005515//protein binding;	-	DEPDC1
ENSG00000146278	1169.67	8.40354826011323	11.6910954478314	9.58935731774621	38.1720157514582	41.9278554392517	23.0778002311012	3.4649	1.7928	7.322e-14	4.842e-12	Up Regulation	6	89080751	89085160	+	2992	PNRC1	GO:0005515;GO:0005634	K18774	-	S;K	2RYBG;35ART;39SAR;3BG8D;3D0ZK;3J2NH;47YTB;499UJ;4M8C7;4N2VM	proline rich nuclear receptor coactivator 1 [Source:HGNC Symbol;Acc:HGNC:17278]	10957	Q12796	-	GO:0005634//nucleus;	GO:0005515//protein binding;	-	PNRC1
ENSG00000108179	633.234	19.5207910152154	17.8156373095453	18.9418221856728	7.18928348255142	6.99504531986336	9.96565836982884	0.423	-1.241	7.324e-14	4.842e-12	Down Regulation	10	79347469	79355334	+	2671	PPIF	GO:0000413;GO:0002931;GO:0003755;GO:0005515;GO:0005737;GO:0005739;GO:0005743;GO:0005753;GO:0005757;GO:0005759;GO:0006457;GO:0006915;GO:0006979;GO:0008637;GO:0010849;GO:0010939;GO:0012501;GO:0016018;GO:0016020;GO:0016853;GO:0032780;GO:0042277;GO:0042981;GO:0043066;GO:0043231;GO:0046902;GO:0070266;GO:0070301;GO:0071243;GO:0071277;GO:0090200;GO:0090201;GO:0090324;GO:1902445;GO:1902686;GO:2000276;GO:…	K09565	EC:5.2.1.8	O	KOG0865;35NUH;38FFS;3B9YC;3D1XY;3J9TB;480P6;48VFZ;4MA24;4N4QX	peptidylprolyl isomerase F [Source:HGNC Symbol;Acc:HGNC:9259]	10105	P30405;A0A024QZS4	GO:0000413//protein peptidyl-prolyl isomerization;GO:0002931//response to ischemia;GO:0006457//protein folding;GO:0006915//apoptotic process;GO:0006979//response to oxidative stress;GO:0008637//apoptotic mitochondrial changes;GO:0010849//regulation of proton-transporting ATPase activity, rotational mechanism;GO:0010939//regulation of necrotic cell death;GO:0012501//programmed cell death;GO:003278…	GO:0005737//cytoplasm;GO:0005739//mitochondrion;GO:0005743//mitochondrial inner membrane;GO:0005753//mitochondrial proton-transporting ATP synthase complex;GO:0005757//mitochondrial permeability transition pore complex;GO:0005759//mitochondrial matrix;GO:0016020//membrane;GO:0043231//intracellular membrane-bounded organelle;	GO:0003755//peptidyl-prolyl cis-trans isomerase activity;GO:0005515//protein binding;GO:0016018//cyclosporin A binding;GO:0016853//isomerase activity;GO:0042277//peptide binding;	ko05415(Diabetic cardiomyopathy);ko05208(Chemical carcinogenesis - reactive oxygen species);ko05145(Toxoplasmosis);ko05022(Pathways of neurodegeneration - multiple diseases);ko05020(Prion disease);ko05017(Spinocerebellar ataxia);ko05016(Huntington disease);ko05012(Parkinson disease);ko05010(Alzheimer disease);ko04613(Neutrophil extracellular trap formation);ko04022(cGMP-PKG signaling pathway);ko0…	PPIF
ENSG00000042493	810.782	23.0244619129236	24.7248378235376	23.8680977571364	14.3072733697074	13.6575624054158	14.2343168733748	0.5832	-0.7778	7.475e-14	4.92e-12	Nodiff	2	85394753	85418432	-	2419	CAPG	GO:0001726;GO:0002102;GO:0003779;GO:0005509;GO:0005515;GO:0005546;GO:0005615;GO:0005634;GO:0005654;GO:0005730;GO:0005737;GO:0005814;GO:0005856;GO:0007417;GO:0008154;GO:0008290;GO:0015629;GO:0019904;GO:0030027;GO:0030031;GO:0042470;GO:0042995;GO:0044877;GO:0045296;GO:0051014;GO:0051015;GO:0051016;GO:0051693;GO:0065003;GO:0070062;GO:0070161;GO:0072686;GO:0090543	K10368	-	S;Z	KOG0443;35BPE;38QM1;3B9JY;3D0D6;3J3W1;47YVF;48X58;4MBYX;4N2FN	capping actin protein, gelsolin like [Source:HGNC Symbol;Acc:HGNC:1474]	822	P40121;B2R9S4;V9HW69	GO:0007417//central nervous system development;GO:0008154//actin polymerization or depolymerization;GO:0030031//cell projection assembly;GO:0051014//actin filament severing;GO:0051016//barbed-end actin filament capping;GO:0051693//actin filament capping;GO:0065003//protein-containing complex assembly;	GO:0001726//ruffle;GO:0002102//podosome;GO:0005615//extracellular space;GO:0005634//nucleus;GO:0005654//nucleoplasm;GO:0005730//nucleolus;GO:0005737//cytoplasm;GO:0005814//centriole;GO:0005856//cytoskeleton;GO:0008290//F-actin capping protein complex;GO:0015629//actin cytoskeleton;GO:0030027//lamellipodium;GO:0042470//melanosome;GO:0042995//cell projection;GO:0070062//extracellular exosome;GO:007…	GO:0003779//actin binding;GO:0005509//calcium ion binding;GO:0005515//protein binding;GO:0005546//phosphatidylinositol-4,5-bisphosphate binding;GO:0019904//protein domain specific binding;GO:0044877//protein-containing complex binding;GO:0045296//cadherin binding;GO:0051015//actin filament binding;	-	CAPG
ENSG00000150990	1299.03	13.6019469186455	13.0975770856673	13.9812432555455	7.47464305298741	7.24676176949461	8.43120093593966	0.5624	-0.8304	8.42e-14	5.517e-12	Nodiff	12	124946825	124989131	-	6908	DHX37	GO:0000166;GO:0000462;GO:0003676;GO:0003723;GO:0003724;GO:0004386;GO:0005515;GO:0005524;GO:0005634;GO:0005654;GO:0005730;GO:0005737;GO:0007420;GO:0016020;GO:0016787;GO:0016887;GO:0031965;GO:0034511;GO:0042254;GO:0042255;GO:2000020	K14780	EC:3.6.4.13	A;L	KOG0926;35FWR;38F2Y;3B9XP;3CTRN;3J21V;486P6;48ZHV;4MG7T;4MWXR	DEAH-box helicase 37 [Source:HGNC Symbol;Acc:HGNC:17210]	57647	Q8IY37	GO:0000462//maturation of SSU-rRNA from tricistronic rRNA transcript (SSU-rRNA, 5.8S rRNA, LSU-rRNA);GO:0007420//brain development;GO:0042254//ribosome biogenesis;GO:0042255//ribosome assembly;GO:2000020//positive regulation of male gonad development;	GO:0005634//nucleus;GO:0005654//nucleoplasm;GO:0005730//nucleolus;GO:0005737//cytoplasm;GO:0016020//membrane;GO:0031965//nuclear membrane;	GO:0000166//nucleotide binding;GO:0003676//nucleic acid binding;GO:0003723//RNA binding;GO:0003724//RNA helicase activity;GO:0004386//helicase activity;GO:0005515//protein binding;GO:0005524//ATP binding;GO:0016787//hydrolase activity;GO:0016887//ATP hydrolysis activity;GO:0034511//U3 snoRNA binding;	-	DHX37
ENSG00000076242	859.345	8.04400290548002	7.77819408796629	7.78501074154783	4.65762348667973	4.2122290270797	4.10581958695903	0.5438	-0.8788	8.59e-14	5.604e-12	Nodiff	3	36993350	37050846	+	7970	MLH1	GO:0000166;GO:0000289;GO:0000712;GO:0000793;GO:0000794;GO:0000795;GO:0001673;GO:0002204;GO:0003682;GO:0003697;GO:0005515;GO:0005524;GO:0005634;GO:0005654;GO:0005694;GO:0005712;GO:0005715;GO:0006281;GO:0006298;GO:0006303;GO:0006974;GO:0007049;GO:0007060;GO:0007129;GO:0007131;GO:0007140;GO:0007283;GO:0008630;GO:0009617;GO:0016020;GO:0016321;GO:0016446;GO:0016447;GO:0016887;GO:0019899;GO:0030983;GO:…	K08734	-	L	KOG1979;35GBW;38E16;3BA7K;3CV1P;3J3UY;485BC;49329;4M6UB;4N4F5	mutL homolog 1 [Source:HGNC Symbol;Acc:HGNC:7127]	4292	P40692	GO:0000289//nuclear-transcribed mRNA poly(A) tail shortening;GO:0000712//resolution of meiotic recombination intermediates;GO:0002204//somatic recombination of immunoglobulin genes involved in immune response;GO:0006281//DNA repair;GO:0006298//mismatch repair;GO:0006303//double-strand break repair via nonhomologous end joining;GO:0006974//cellular response to DNA damage stimulus;GO:0007049//cell …	GO:0000793//condensed chromosome;GO:0000794//condensed nuclear chromosome;GO:0000795//synaptonemal complex;GO:0001673//male germ cell nucleus;GO:0005634//nucleus;GO:0005654//nucleoplasm;GO:0005694//chromosome;GO:0005712//chiasma;GO:0005715//late recombination nodule;GO:0016020//membrane;GO:0032300//mismatch repair complex;GO:0032389//MutLalpha complex;	GO:0000166//nucleotide binding;GO:0003682//chromatin binding;GO:0003697//single-stranded DNA binding;GO:0005515//protein binding;GO:0005524//ATP binding;GO:0016887//ATP hydrolysis activity;GO:0019899//enzyme binding;GO:0030983//mismatched DNA binding;GO:0032137//guanine/thymine mispair binding;GO:0032407//MutSalpha complex binding;GO:0140664//ATP-dependent DNA damage sensor activity;	ko05226(Gastric cancer);ko05213(Endometrial cancer);ko05210(Colorectal cancer);ko05200(Pathways in cancer);ko03460(Fanconi anemia pathway);ko03430(Mismatch repair);ko01524(Platinum drug resistance)	MLH1
ENSG00000131351	191.855	3.19546897793728	2.71225669228867	2.9981991119537	0.938260282342005	0.686077490129194	1.22477327823933	0.3147	-1.668	9.717e-14	6.311e-12	Down Regulation	19	17049729	17075625	-	5533	HAUS8	GO:0000922;GO:0003674;GO:0005515;GO:0005737;GO:0005813;GO:0005815;GO:0005819;GO:0005829;GO:0005856;GO:0005874;GO:0005880;GO:0007049;GO:0007098;GO:0008017;GO:0051225;GO:0051301;GO:0070652;GO:1990498	K16591	-	S;Z	2S04A;35JK0;39WRR;3BIPA;3D32S;3J67Z;48B7T;490ZK;4MD7F;4MYKT	HAUS augmin like complex subunit 8 [Source:HGNC Symbol;Acc:HGNC:30532]	93323	Q9BT25	GO:0007049//cell cycle;GO:0007098//centrosome cycle;GO:0051225//spindle assembly;GO:0051301//cell division;	GO:0000922//spindle pole;GO:0005737//cytoplasm;GO:0005813//centrosome;GO:0005815//microtubule organizing center;GO:0005819//spindle;GO:0005829//cytosol;GO:0005856//cytoskeleton;GO:0005874//microtubule;GO:0005880//nuclear microtubule;GO:0070652//HAUS complex;GO:1990498//mitotic spindle microtubule;	GO:0003674//molecular_function;GO:0005515//protein binding;GO:0008017//microtubule binding;	-	HAUS8
ENSG00000088325	10499.6	263.311816536347	234.176769463988	253.534237735709	64.616610011166	58.8857615662917	113.143496731308	0.3099	-1.69	1.15e-13	7.434e-12	Down Regulation	20	31739271	31801805	+	3605	TPX2	GO:0000278;GO:0000922;GO:0005515;GO:0005634;GO:0005654;GO:0005737;GO:0005819;GO:0005829;GO:0005856;GO:0005874;GO:0005880;GO:0006915;GO:0007020;GO:0007026;GO:0007049;GO:0008017;GO:0015630;GO:0019901;GO:0030295;GO:0032147;GO:0043203;GO:0045171;GO:0051301;GO:0060236;GO:0061676;GO:0072686;GO:0090307	K16812	-	S;Z	2QVQS;35MTS;38E0C;3BF83;3D056;3JAVD;4856R;4944D;4MB7Y;4MTJR	TPX2 microtubule nucleation factor [Source:HGNC Symbol;Acc:HGNC:1249]	22974	Q9ULW0;Q643R0	GO:0000278//mitotic cell cycle;GO:0006915//apoptotic process;GO:0007020//microtubule nucleation;GO:0007026//negative regulation of microtubule depolymerization;GO:0007049//cell cycle;GO:0032147//activation of protein kinase activity;GO:0051301//cell division;GO:0060236//regulation of mitotic spindle organization;GO:0090307//mitotic spindle assembly;	GO:0000922//spindle pole;GO:0005634//nucleus;GO:0005654//nucleoplasm;GO:0005737//cytoplasm;GO:0005819//spindle;GO:0005829//cytosol;GO:0005856//cytoskeleton;GO:0005874//microtubule;GO:0005880//nuclear microtubule;GO:0015630//microtubule cytoskeleton;GO:0043203//axon hillock;GO:0045171//intercellular bridge;GO:0072686//mitotic spindle;	GO:0005515//protein binding;GO:0008017//microtubule binding;GO:0019901//protein kinase binding;GO:0030295//protein kinase activator activity;GO:0061676//importin-alpha family protein binding;	-	TPX2
ENSG00000088970	231.812	1.53905087278365	1.3205101182552	1.22447803575088	4.09521624595459	3.77045952325259	3.20087314848171	2.6769	1.4205	1.209e-13	7.786e-12	Up Regulation	20	21125983	21246622	+	5207	KIZ	GO:0005515;GO:0005737;GO:0005813;GO:0005815;GO:0005856;GO:0007051;GO:0016020;GO:0016021;GO:0019901;GO:0042995	K16539	-	S;Z	2R72X;35PC8;38ZXM;3BJDG;3D0UK;3J9UH;4876X;494SB;4MDKJ;4MT8G	kizuna centrosomal protein [Source:HGNC Symbol;Acc:HGNC:15865]	55857	Q2M2Z5	GO:0007051//spindle organization;	GO:0005737//cytoplasm;GO:0005813//centrosome;GO:0005815//microtubule organizing center;GO:0005856//cytoskeleton;GO:0016020//membrane;GO:0016021//integral component of membrane;GO:0042995//cell projection;	GO:0005515//protein binding;GO:0019901//protein kinase binding;	-	KIZ
ENSG00000125648	344	1.4366130214631	2.31430345468378	2.23757572721255	6.51879167421853	4.82431398821732	6.76677679536489	2.9984	1.5842	1.243e-13	7.968e-12	Up Regulation	19	6436079	6465203	-	4881	SLC25A23	GO:0002082;GO:0005347;GO:0005509;GO:0005515;GO:0005739;GO:0005743;GO:0006851;GO:0015867;GO:0016020;GO:0016021;GO:0036444;GO:0043457;GO:0046872;GO:0051282;GO:0051503;GO:0051561;GO:0055085;GO:0071277;GO:0097274;GO:1900069	K14684	-	C;U	KOG0036;35DB1;38B6F;3BD3M;3CS5J;3J6CK;481B5;49451;4MHIN;4N1CK	solute carrier family 25 member 23 [Source:HGNC Symbol;Acc:HGNC:19375]	79085	Q9BV35	GO:0002082//regulation of oxidative phosphorylation;GO:0006851//mitochondrial calcium ion transmembrane transport;GO:0015867//ATP transport;GO:0036444//calcium import into the mitochondrion;GO:0043457//regulation of cellular respiration;GO:0051282//regulation of sequestering of calcium ion;GO:0051503//adenine nucleotide transport;GO:0051561//positive regulation of mitochondrial calcium ion concen…	GO:0005739//mitochondrion;GO:0005743//mitochondrial inner membrane;GO:0016020//membrane;GO:0016021//integral component of membrane;	GO:0005347//ATP transmembrane transporter activity;GO:0005509//calcium ion binding;GO:0005515//protein binding;GO:0046872//metal ion binding;	-	SLC25A23
ENSG00000163629	912.891	3.45478610793547	3.30434895462169	3.05249954355831	8.15336358402073	8.36985548004699	6.35198746737957	2.3104	1.2081	1.25e-13	7.977e-12	Up Regulation	4	86594315	86815171	+	9496	PTPN13	GO:0001650;GO:0001933;GO:0004721;GO:0004725;GO:0005515;GO:0005634;GO:0005654;GO:0005737;GO:0005829;GO:0005856;GO:0005886;GO:0006470;GO:0014066;GO:0016311;GO:0016787;GO:0016791;GO:0030027;GO:0031047;GO:0035335;GO:0036312;GO:0042995;GO:0043005;GO:0044297;GO:0070062;GO:0097237;GO:1904890	K02374	-	T	KOG0792;35CKZ;38CNY;3BKRY;3CWKT;3J6DS;489H8;49627;4MBQ9;4MZ88	protein tyrosine phosphatase non-receptor type 13 [Source:HGNC Symbol;Acc:HGNC:9646]	5783	Q12923	GO:0001933//negative regulation of protein phosphorylation;GO:0006470//protein dephosphorylation;GO:0014066//regulation of phosphatidylinositol 3-kinase signaling;GO:0016311//dephosphorylation;GO:0031047//gene silencing by RNA;GO:0035335//peptidyl-tyrosine dephosphorylation;GO:0097237//cellular response to toxic substance;GO:1904890//negative regulation of excitatory synapse assembly;	GO:0001650//fibrillar center;GO:0005634//nucleus;GO:0005654//nucleoplasm;GO:0005737//cytoplasm;GO:0005829//cytosol;GO:0005856//cytoskeleton;GO:0005886//plasma membrane;GO:0030027//lamellipodium;GO:0042995//cell projection;GO:0043005//neuron projection;GO:0044297//cell body;GO:0070062//extracellular exosome;	GO:0004721//phosphoprotein phosphatase activity;GO:0004725//protein tyrosine phosphatase activity;GO:0005515//protein binding;GO:0016787//hydrolase activity;GO:0016791//phosphatase activity;GO:0036312//phosphatidylinositol 3-kinase regulatory subunit binding;	ko04210(Apoptosis)	PTPN13
ENSG00000112812	199.878	0.426066523223418	0.608632452605299	0.602632999258489	4.61133654519719	4.84375247296269	1.73112720290661	6.8324	2.7724	1.303e-13	8.278e-12	Up Regulation	6	27247701	27256624	+	5290	PRSS16	GO:0005764;GO:0005768;GO:0006508;GO:0008233;GO:0008236;GO:0008239;GO:0016020;GO:0016021;GO:0016787;GO:0030163;GO:0031410	K09649	EC:3.4.-.-	S;O	KOG2182;35HCG;38H6D;3BBCG;3CS02;3J4YX;481ZB;49754;4M8H8;4N5P1	serine protease 16 [Source:HGNC Symbol;Acc:HGNC:9480]	10279	Q9NQE7	GO:0006508//proteolysis;GO:0030163//protein catabolic process;	GO:0005764//lysosome;GO:0005768//endosome;GO:0016020//membrane;GO:0016021//integral component of membrane;GO:0031410//cytoplasmic vesicle;	GO:0008233//peptidase activity;GO:0008236//serine-type peptidase activity;GO:0008239//dipeptidyl-peptidase activity;GO:0016787//hydrolase activity;	-	PRSS16
ENSG00000066135	647.126	3.87435980387777	4.14753438110457	3.5644634530115	10.4772884731327	12.1853632927709	8.17311992662413	2.6434	1.4024	1.308e-13	8.279e-12	Up Regulation	1	43650149	43705518	+	5184	KDM4A	GO:0001650;GO:0005515;GO:0005634;GO:0005654;GO:0005721;GO:0005737;GO:0005829;GO:0006325;GO:0006338;GO:0008270;GO:0010507;GO:0010628;GO:0010629;GO:0014898;GO:0016491;GO:0016577;GO:0031625;GO:0031667;GO:0032452;GO:0032454;GO:0033169;GO:0035064;GO:0043229;GO:0045666;GO:0045892;GO:0046872;GO:0048712;GO:0051213;GO:0051864;GO:0060548;GO:0070076;GO:0070544;GO:0140681;GO:0140684;GO:1900113	K06709	-	C;K;L;B	KOG0958;35FVK;38EFF;3B95Z;3CUR9;3J5SF;485UC;48YEN;4M902;4MZS0	lysine demethylase 4A [Source:HGNC Symbol;Acc:HGNC:22978]	9682	O75164	GO:0006325//chromatin organization;GO:0006338//chromatin remodeling;GO:0010507//negative regulation of autophagy;GO:0010628//positive regulation of gene expression;GO:0010629//negative regulation of gene expression;GO:0014898//cardiac muscle hypertrophy in response to stress;GO:0016577//histone demethylation;GO:0031667//response to nutrient levels;GO:0033169//histone H3-K9 demethylation;GO:004566…	GO:0001650//fibrillar center;GO:0005634//nucleus;GO:0005654//nucleoplasm;GO:0005721//pericentric heterochromatin;GO:0005737//cytoplasm;GO:0005829//cytosol;GO:0043229//intracellular organelle;	GO:0005515//protein binding;GO:0008270//zinc ion binding;GO:0016491//oxidoreductase activity;GO:0031625//ubiquitin protein ligase binding;GO:0032452//histone demethylase activity;GO:0032454//histone H3-methyl-lysine-9 demethylase activity;GO:0035064//methylated histone binding;GO:0046872//metal ion binding;GO:0051213//dioxygenase activity;GO:0051864//histone H3-methyl-lysine-36 demethylase activi…	-	KDM4A
ENSG00000188559	963.903	2.99684791211981	3.59775297195598	3.44108935811778	6.13848980175145	5.67727705901068	6.34671346667142	1.7924	0.8419	1.332e-13	8.389e-12	Nodiff	20	20389530	20712644	-	11649	RALGAPA2	GO:0005096;GO:0005515;GO:0005615;GO:0005634;GO:0005737;GO:0005829;GO:0005886;GO:0043547;GO:0046982;GO:0051056;GO:0090630	K25768	-	O;T	KOG3686;35JGK;38GAR;3BC47;3CZ41;3JC11;4824E;48WHT;4MCJZ;4N3KU	Ral GTPase activating protein catalytic subunit alpha 2 [Source:HGNC Symbol;Acc:HGNC:16207]	57186	Q2PPJ7	GO:0043547//positive regulation of GTPase activity;GO:0051056//regulation of small GTPase mediated signal transduction;GO:0090630//activation of GTPase activity;	GO:0005615//extracellular space;GO:0005634//nucleus;GO:0005737//cytoplasm;GO:0005829//cytosol;GO:0005886//plasma membrane;	GO:0005096//GTPase activator activity;GO:0005515//protein binding;GO:0046982//protein heterodimerization activity;	-	RALGAPA2
ENSG00000184216	5626.01	106.586487241234	89.5091015276836	98.3420914323527	47.0502495185013	50.3274856060086	55.4957808215842	0.5128	-0.9636	1.409e-13	8.84e-12	Nodiff	X	154010506	154019902	-	4264	IRAK1	GO:0000166;GO:0001959;GO:0002224;GO:0002376;GO:0002755;GO:0004672;GO:0004674;GO:0004704;GO:0005515;GO:0005524;GO:0005634;GO:0005654;GO:0005737;GO:0005811;GO:0005829;GO:0005886;GO:0006468;GO:0006807;GO:0007165;GO:0007250;GO:0007254;GO:0007568;GO:0010008;GO:0010468;GO:0010556;GO:0016020;GO:0016301;GO:0016310;GO:0016740;GO:0019221;GO:0019901;GO:0031072;GO:0031326;GO:0031663;GO:0032088;GO:0032481;GO:…	K04730	EC:2.7.11.1	T;K;L	KOG1187;35K7W;38G1T;3BCM7;3CUYA;3JC9B;4826W;492AB;4M6ZY;4MW13	interleukin 1 receptor associated kinase 1 [Source:HGNC Symbol;Acc:HGNC:6112]	3654	P51617	GO:0001959//regulation of cytokine-mediated signaling pathway;GO:0002224//toll-like receptor signaling pathway;GO:0002376//immune system process;GO:0002755//MyD88-dependent toll-like receptor signaling pathway;GO:0006468//protein phosphorylation;GO:0006807//nitrogen compound metabolic process;GO:0007165//signal transduction;GO:0007250//activation of NF-kappaB-inducing kinase activity;GO:0007254//…	GO:0005634//nucleus;GO:0005654//nucleoplasm;GO:0005737//cytoplasm;GO:0005811//lipid droplet;GO:0005829//cytosol;GO:0005886//plasma membrane;GO:0010008//endosome membrane;GO:0016020//membrane;GO:0032991//protein-containing complex;	GO:0000166//nucleotide binding;GO:0004672//protein kinase activity;GO:0004674//protein serine/threonine kinase activity;GO:0004704//NF-kappaB-inducing kinase activity;GO:0005515//protein binding;GO:0005524//ATP binding;GO:0016301//kinase activity;GO:0016740//transferase activity;GO:0019901//protein kinase binding;GO:0031072//heat shock protein binding;GO:0042802//identical protein binding;GO:0042…	ko05417(Lipid and atherosclerosis);ko05171(Coronavirus disease - COVID-19);ko05170(Human immunodeficiency virus 1 infection);ko05169(Epstein-Barr virus infection);ko05168(Herpes simplex virus 1 infection);ko05162(Measles);ko05161(Hepatitis B);ko05152(Tuberculosis);ko05145(Toxoplasmosis);ko05142(Chagas disease);ko05140(Leishmaniasis);ko05135(Yersinia infection);ko05133(Pertussis);ko05132(Salmonell…	IRAK1
ENSG00000125885	416.85	5.45083727552269	3.84569857231512	4.59789270547192	1.32095989011048	1.18765903317243	1.94480770712704	0.3149	-1.667	1.535e-13	9.588e-12	Down Regulation	20	5950652	5998977	+	7691	MCM8	GO:0000166;GO:0000724;GO:0003677;GO:0003682;GO:0003697;GO:0004386;GO:0005515;GO:0005524;GO:0005634;GO:0005654;GO:0005694;GO:0006259;GO:0006281;GO:0006974;GO:0007049;GO:0007292;GO:0016787;GO:0016887;GO:0017116;GO:0019899;GO:0032406;GO:0032407;GO:0032408;GO:0032508;GO:0036298;GO:0042555;GO:0048232;GO:0050821;GO:0070716;GO:0071168;GO:0097362	K10737	EC:5.6.2.4	L	KOG0480;35DJS;38B9W;3BHR8;3CS3P;3J3NH;480D1;4935I;4MGJ1;4MZ2S	minichromosome maintenance 8 homologous recombination repair factor [Source:HGNC Symbol;Acc:HGNC:16147]	84515	Q9UJA3	GO:0000724//double-strand break repair via homologous recombination;GO:0006259//DNA metabolic process;GO:0006281//DNA repair;GO:0006974//cellular response to DNA damage stimulus;GO:0007049//cell cycle;GO:0007292//female gamete generation;GO:0032508//DNA duplex unwinding;GO:0036298//recombinational interstrand cross-link repair;GO:0048232//male gamete generation;GO:0050821//protein stabilization;G…	GO:0005634//nucleus;GO:0005654//nucleoplasm;GO:0005694//chromosome;GO:0042555//MCM complex;GO:0097362//MCM8-MCM9 complex;	GO:0000166//nucleotide binding;GO:0003677//DNA binding;GO:0003682//chromatin binding;GO:0003697//single-stranded DNA binding;GO:0004386//helicase activity;GO:0005515//protein binding;GO:0005524//ATP binding;GO:0016787//hydrolase activity;GO:0016887//ATP hydrolysis activity;GO:0017116//single-stranded DNA helicase activity;GO:0019899//enzyme binding;GO:0032406//MutLbeta complex binding;GO:0032407/…	-	MCM8
ENSG00000006459	559.404	1.62361825546071	2.26359193947557	1.81299698077907	5.18452509287893	5.33809237616429	4.08179046023796	2.5478	1.3492	1.59e-13	9.892e-12	Up Regulation	7	140084746	140176983	-	9378	KDM7A	GO:0003712;GO:0005506;GO:0005634;GO:0005654;GO:0005730;GO:0006325;GO:0006354;GO:0006357;GO:0006482;GO:0007399;GO:0008270;GO:0016491;GO:0016706;GO:0030901;GO:0032452;GO:0032454;GO:0033169;GO:0035064;GO:0035574;GO:0035575;GO:0045893;GO:0046872;GO:0051213;GO:0051864;GO:0070544;GO:0071557;GO:0071558;GO:0140683	K11445	-	O;B	KOG1633;KOG1632;35H1C;38CF1;3B9VC;3CXF7;3JA7J;481KS;48VVX;4MA10;4MTBW	lysine demethylase 7A [Source:HGNC Symbol;Acc:HGNC:22224]	80853	Q6ZMT4	GO:0006325//chromatin organization;GO:0006354//DNA-templated transcription, elongation;GO:0006357//regulation of transcription by RNA polymerase II;GO:0006482//protein demethylation;GO:0007399//nervous system development;GO:0030901//midbrain development;GO:0033169//histone H3-K9 demethylation;GO:0035574//histone H4-K20 demethylation;GO:0045893//positive regulation of transcription, DNA-templated;…	GO:0005634//nucleus;GO:0005654//nucleoplasm;GO:0005730//nucleolus;	GO:0003712//transcription coregulator activity;GO:0005506//iron ion binding;GO:0008270//zinc ion binding;GO:0016491//oxidoreductase activity;GO:0016706//2-oxoglutarate-dependent dioxygenase activity;GO:0032452//histone demethylase activity;GO:0032454//histone H3-methyl-lysine-9 demethylase activity;GO:0035064//methylated histone binding;GO:0035575//histone H4-methyl-lysine-20 demethylase activity…	-	KDM7A
ENSG00000163507	1677.06	36.5886216387108	27.7798819472515	31.3808535335728	8.13122997895083	6.73575941628942	13.4395052873305	0.2902	-1.785	1.613e-13	9.989e-12	Down Regulation	3	108549864	108589644	-	4579	CIP2A	GO:0005515;GO:0005737;GO:0005829;GO:0005886;GO:0016020;GO:0016021;GO:0042803;GO:0045296	-	-	S;U	2QTAP;359RC;38GIX;3BHDB;3CTBN;3J3F6;48731;48YXB;4MR7F;4MT6M	cellular inhibitor of PP2A [Source:HGNC Symbol;Acc:HGNC:29302]	57650	Q8TCG1	-	GO:0005737//cytoplasm;GO:0005829//cytosol;GO:0005886//plasma membrane;GO:0016020//membrane;GO:0016021//integral component of membrane;	GO:0005515//protein binding;GO:0042803//protein homodimerization activity;GO:0045296//cadherin binding;	-	CIP2A
ENSG00000112029	921.509	21.3543009250144	17.0391618250034	17.4228845291421	8.75829166117315	7.22960716195487	9.19882805473969	0.4446	-1.169	1.668e-13	1.029e-11	Down Regulation	6	152970519	152983579	-	3856	FBXO5	GO:0001556;GO:0005515;GO:0005634;GO:0005654;GO:0005737;GO:0005819;GO:0005829;GO:0005856;GO:0006275;GO:0007049;GO:0007057;GO:0007088;GO:0007346;GO:0008284;GO:0010948;GO:0010971;GO:0010997;GO:0016050;GO:0016567;GO:0019901;GO:0032876;GO:0040020;GO:0045669;GO:0045835;GO:0045841;GO:0046785;GO:0046872;GO:0051225;GO:0051301;GO:0051444;GO:0051784;GO:0070169;GO:0072687;GO:0140678;GO:1904667;GO:1905322;GO:…	K10292	-	S;K	2QPWN;35MCD;39RQM;3BF5K;3D0GY;3J6IX;48AN5;48Z88;4MBAC;4MUFG	F-box protein 5 [Source:HGNC Symbol;Acc:HGNC:13584]	26271	Q9UKT4	GO:0001556//oocyte maturation;GO:0006275//regulation of DNA replication;GO:0007049//cell cycle;GO:0007057//spindle assembly involved in female meiosis I;GO:0007088//regulation of mitotic nuclear division;GO:0007346//regulation of mitotic cell cycle;GO:0008284//positive regulation of cell population proliferation;GO:0010948//negative regulation of cell cycle process;GO:0010971//positive regulation…	GO:0005634//nucleus;GO:0005654//nucleoplasm;GO:0005737//cytoplasm;GO:0005819//spindle;GO:0005829//cytosol;GO:0005856//cytoskeleton;GO:0072687//meiotic spindle;	GO:0005515//protein binding;GO:0010997//anaphase-promoting complex binding;GO:0019901//protein kinase binding;GO:0046872//metal ion binding;GO:0140678//molecular function inhibitor activity;GO:1990948//ubiquitin ligase inhibitor activity;	ko04114(Oocyte meiosis)	FBXO5
ENSG00000121068	189.1	2.38820802103492	2.71866050782653	2.87316201894757	0.670004158897358	0.76068009784255	1.14433143810683	0.3184	-1.651	1.678e-13	1.031e-11	Down Regulation	17	61399843	61409466	+	6082	TBX2	GO:0000122;GO:0000785;GO:0000978;GO:0000981;GO:0001227;GO:0001708;GO:0001947;GO:0003007;GO:0003148;GO:0003151;GO:0003203;GO:0003272;GO:0003677;GO:0003700;GO:0005515;GO:0005634;GO:0005667;GO:0005737;GO:0006355;GO:0006357;GO:0006915;GO:0007219;GO:0007521;GO:0008016;GO:0008543;GO:0022008;GO:0032526;GO:0035050;GO:0035909;GO:0036302;GO:0042733;GO:0042826;GO:0043474;GO:0043565;GO:0045892;GO:0045893;GO:…	K10176	-	K	KOG3585;35D37;38XFZ;3BAHC;3CRUC;3J5PI;48402;49298;4MFF5;4N2S5	T-box transcription factor 2 [Source:HGNC Symbol;Acc:HGNC:11597]	6909	Q13207;A0A024QZ86	GO:0000122//negative regulation of transcription by RNA polymerase II;GO:0001708//cell fate specification;GO:0001947//heart looping;GO:0003007//heart morphogenesis;GO:0003148//outflow tract septum morphogenesis;GO:0003151//outflow tract morphogenesis;GO:0003203//endocardial cushion morphogenesis;GO:0003272//endocardial cushion formation;GO:0006355//regulation of transcription, DNA-templated;GO:00…	GO:0000785//chromatin;GO:0005634//nucleus;GO:0005667//transcription regulator complex;GO:0005737//cytoplasm;	GO:0000978//RNA polymerase II cis-regulatory region sequence-specific DNA binding;GO:0000981//DNA-binding transcription factor activity, RNA polymerase II-specific;GO:0001227//DNA-binding transcription repressor activity, RNA polymerase II-specific;GO:0003677//DNA binding;GO:0003700//DNA-binding transcription factor activity;GO:0005515//protein binding;GO:0042826//histone deacetylase binding;GO:0…	-	TBX2
ENSG00000090273	3252.41	82.4281474102823	81.1852710313093	80.9668186843161	44.9237169789724	45.2973862552916	52.9052248256833	0.5783	-0.79	1.691e-13	1.034e-11	Nodiff	1	26900238	26946871	+	2848	NUDC	GO:0005515;GO:0005634;GO:0005654;GO:0005737;GO:0005794;GO:0005819;GO:0005829;GO:0005856;GO:0005874;GO:0006457;GO:0007049;GO:0007052;GO:0007080;GO:0007097;GO:0016020;GO:0016021;GO:0030496;GO:0043434;GO:0045296;GO:0051082;GO:0051301;GO:0072686	K25866	-	S;T	KOG2265;35HZK;38D01;3BAUI;3CTCC;3J3TJ;48478;491PG;4MA47;4MSXX	nuclear distribution C, dynein complex regulator [Source:HGNC Symbol;Acc:HGNC:8045]	10726	Q9Y266	GO:0006457//protein folding;GO:0007049//cell cycle;GO:0007052//mitotic spindle organization;GO:0007080//mitotic metaphase plate congression;GO:0007097//nuclear migration;GO:0043434//response to peptide hormone;GO:0051301//cell division;	GO:0005634//nucleus;GO:0005654//nucleoplasm;GO:0005737//cytoplasm;GO:0005794//Golgi apparatus;GO:0005819//spindle;GO:0005829//cytosol;GO:0005856//cytoskeleton;GO:0005874//microtubule;GO:0016020//membrane;GO:0016021//integral component of membrane;GO:0030496//midbody;GO:0072686//mitotic spindle;	GO:0005515//protein binding;GO:0045296//cadherin binding;GO:0051082//unfolded protein binding;	-	NUDC
ENSG00000001461	624.85	2.34014130728673	2.86908032104416	2.65145502200437	5.07359640276732	4.74079084752905	4.9836295209943	1.8658	0.8998	1.729e-13	1.053e-11	Nodiff	1	24415802	24472976	+	9396	NIPAL3	GO:0005515;GO:0015095;GO:0015693;GO:0016020;GO:0016021;GO:1903830	K22733	-	P;U	KOG2922;359SR;38GA7;3BKSS;3CXZ1;3J7JT;48571;495EK;4MD7C;4N3HP	NIPA like domain containing 3 [Source:HGNC Symbol;Acc:HGNC:25233]	57185	Q6P499	GO:0015693//magnesium ion transport;GO:1903830//magnesium ion transmembrane transport;	GO:0016020//membrane;GO:0016021//integral component of membrane;	GO:0005515//protein binding;GO:0015095//magnesium ion transmembrane transporter activity;	-	NIPAL3
ENSG00000177469	5374.29	105.36401013363	118.374	113.011224300099	52.6003731645286	53.382188712443	68.6952976337279	0.5129	-0.9634	1.762e-13	1.069e-11	Nodiff	17	42402449	42423256	-	3570	CAVIN1	GO:0003723;GO:0005515;GO:0005634;GO:0005654;GO:0005737;GO:0005739;GO:0005783;GO:0005829;GO:0005886;GO:0005901;GO:0006353;GO:0006361;GO:0006363;GO:0009303;GO:0009306;GO:0016020;GO:0019843;GO:0032991;GO:0042134;GO:0042802;GO:0043231;GO:0045121;GO:2000147	K19387	-	S;K	2QV3D;35DQD;38FGT;3BFRN;3CXM2;3J1WF;4815F;497YH;4MDNK;4N1QQ	caveolae associated protein 1 [Source:HGNC Symbol;Acc:HGNC:9688]	284119	Q6NZI2	GO:0006353//DNA-templated transcription, termination;GO:0006361//transcription initiation from RNA polymerase I promoter;GO:0006363//termination of RNA polymerase I transcription;GO:0009303//rRNA transcription;GO:0009306//protein secretion;GO:2000147//positive regulation of cell motility;	GO:0005634//nucleus;GO:0005654//nucleoplasm;GO:0005737//cytoplasm;GO:0005739//mitochondrion;GO:0005783//endoplasmic reticulum;GO:0005829//cytosol;GO:0005886//plasma membrane;GO:0005901//caveola;GO:0016020//membrane;GO:0032991//protein-containing complex;GO:0043231//intracellular membrane-bounded organelle;GO:0045121//membrane raft;	GO:0003723//RNA binding;GO:0005515//protein binding;GO:0019843//rRNA binding;GO:0042134//rRNA primary transcript binding;GO:0042802//identical protein binding;	-	CAVIN1
ENSG00000013573	922.887	9.16486331466538	7.74176021491366	8.69977717128012	3.41586930838835	3.84931921315971	4.5166274946733	0.4542	-1.139	1.869e-13	1.129e-11	Down Regulation	12	31073860	31104799	+	8367	DDX11	GO:0000166;GO:0000785;GO:0000922;GO:0003676;GO:0003677;GO:0003678;GO:0003682;GO:0003688;GO:0003690;GO:0003697;GO:0003723;GO:0003727;GO:0004386;GO:0005515;GO:0005524;GO:0005634;GO:0005654;GO:0005694;GO:0005730;GO:0005737;GO:0005813;GO:0005815;GO:0005856;GO:0006139;GO:0006259;GO:0006260;GO:0006281;GO:0006974;GO:0007062;GO:0008094;GO:0008186;GO:0016043;GO:0016787;GO:0016818;GO:0016887;GO:0030496;GO:…	K11273	EC:3.6.4.13	K;L	KOG1133;35RHH;38BI6;3BCM0;3CX8P;3JJ0M;48646;49FVQ;4MM6G;4MXUR	DEAD/H-box helicase 11 [Source:HGNC Symbol;Acc:HGNC:2736]	1663	Q96FC9	GO:0006139//nucleobase-containing compound metabolic process;GO:0006259//DNA metabolic process;GO:0006260//DNA replication;GO:0006281//DNA repair;GO:0006974//cellular response to DNA damage stimulus;GO:0007062//sister chromatid cohesion;GO:0016043//cellular component organization;GO:0031297//replication fork processing;GO:0032079//positive regulation of endodeoxyribonuclease activity;GO:0032091//…	GO:0000785//chromatin;GO:0000922//spindle pole;GO:0005634//nucleus;GO:0005654//nucleoplasm;GO:0005694//chromosome;GO:0005730//nucleolus;GO:0005737//cytoplasm;GO:0005813//centrosome;GO:0005815//microtubule organizing center;GO:0005856//cytoskeleton;GO:0030496//midbody;GO:0031390//Ctf18 RFC-like complex;GO:0070062//extracellular exosome;	GO:0000166//nucleotide binding;GO:0003676//nucleic acid binding;GO:0003677//DNA binding;GO:0003678//DNA helicase activity;GO:0003682//chromatin binding;GO:0003688//DNA replication origin binding;GO:0003690//double-stranded DNA binding;GO:0003697//single-stranded DNA binding;GO:0003723//RNA binding;GO:0003727//single-stranded RNA binding;GO:0004386//helicase activity;GO:0005515//protein binding;GO…	-	DDX11
ENSG00000111247	458.81	18.0013615201484	12.3568166177876	15.6997597367621	4.45349012413092	3.85062500598163	6.37490808291327	0.3131	-1.676	1.938e-13	1.166e-11	Down Regulation	12	4538798	4560047	+	2557	RAD51AP1	GO:0000217;GO:0000724;GO:0000781;GO:0000785;GO:0003677;GO:0003690;GO:0003697;GO:0003723;GO:0005515;GO:0005634;GO:0005654;GO:0005694;GO:0006281;GO:0006310;GO:0006974;GO:0010569;GO:0010845;GO:0032991;GO:0036297;GO:0051321;GO:0062037;GO:0071479;GO:1905168	K20778	-	S;L	2RXRS;35HP7;38BVB;3BMXK;3CUBD;3J7C1;489KK;499EB;4MBNU;4MWF7	RAD51 associated protein 1 [Source:HGNC Symbol;Acc:HGNC:16956]	10635	Q96B01	GO:0000724//double-strand break repair via homologous recombination;GO:0006281//DNA repair;GO:0006310//DNA recombination;GO:0006974//cellular response to DNA damage stimulus;GO:0010569//regulation of double-strand break repair via homologous recombination;GO:0010845//positive regulation of reciprocal meiotic recombination;GO:0036297//interstrand cross-link repair;GO:0051321//meiotic cell cycle;GO…	GO:0000781//chromosome, telomeric region;GO:0000785//chromatin;GO:0005634//nucleus;GO:0005654//nucleoplasm;GO:0005694//chromosome;GO:0032991//protein-containing complex;	GO:0000217//DNA secondary structure binding;GO:0003677//DNA binding;GO:0003690//double-stranded DNA binding;GO:0003697//single-stranded DNA binding;GO:0003723//RNA binding;GO:0005515//protein binding;GO:0062037//D-loop DNA binding;	-	RAD51AP1
ENSG00000185745	963.045	21.7866447963143	18.060102578845	20.2031627006222	3.25443606473833	1.58118027540107	5.80871841436505	0.1733	-2.528	2.016e-13	1.209e-11	Down Regulation	10	89392546	89406487	+	4614	IFIT1	GO:0002376;GO:0003723;GO:0005515;GO:0005737;GO:0005829;GO:0009615;GO:0019060;GO:0032091;GO:0043657;GO:0045070;GO:0045071;GO:0045087;GO:0050688;GO:0051097;GO:0051607;GO:0071357;GO:0071360;GO:0140374	K14217	-	S;O	KOG1124;35KD4;39B55;3BE34;3CVF9;3J1UD;485IB;4906T;4MDAM;4N1SK	interferon induced protein with tetratricopeptide repeats 1 [Source:HGNC Symbol;Acc:HGNC:5407]	3434	P09914	GO:0002376//immune system process;GO:0009615//response to virus;GO:0019060//intracellular transport of viral protein in host cell;GO:0032091//negative regulation of protein binding;GO:0045070//positive regulation of viral genome replication;GO:0045071//negative regulation of viral genome replication;GO:0045087//innate immune response;GO:0050688//regulation of defense response to virus;GO:0051097/…	GO:0005737//cytoplasm;GO:0005829//cytosol;GO:0043657//host cell;	GO:0003723//RNA binding;GO:0005515//protein binding;	ko05160(Hepatitis C)	IFIT1
ENSG00000110721	2489.42	24.3391646140656	26.3915098572582	25.3684549483896	46.3906854212268	51.7712224809867	44.123070166382	1.8545	0.891	2.154e-13	1.285e-11	Nodiff	11	68052859	68121444	-	3877	CHKA	GO:0000166;GO:0004103;GO:0004104;GO:0004305;GO:0004713;GO:0005524;GO:0005737;GO:0005811;GO:0005829;GO:0006629;GO:0006646;GO:0006656;GO:0006657;GO:0006869;GO:0008654;GO:0016301;GO:0016310;GO:0016740;GO:0018108;GO:0042802;GO:0042803	K14156	-	M	KOG2686;35KVH;38HR7;3BB27;3CVYN;3JAQK;47Z8I;494UA;4M5R7;4N693	choline kinase alpha [Source:HGNC Symbol;Acc:HGNC:1937]	1119	P35790	GO:0006629//lipid metabolic process;GO:0006646//phosphatidylethanolamine biosynthetic process;GO:0006656//phosphatidylcholine biosynthetic process;GO:0006657//CDP-choline pathway;GO:0006869//lipid transport;GO:0008654//phospholipid biosynthetic process;GO:0016310//phosphorylation;GO:0018108//peptidyl-tyrosine phosphorylation;	GO:0005737//cytoplasm;GO:0005811//lipid droplet;GO:0005829//cytosol;	GO:0000166//nucleotide binding;GO:0004103//choline kinase activity;GO:0004104//cholinesterase activity;GO:0004305//ethanolamine kinase activity;GO:0004713//protein tyrosine kinase activity;GO:0005524//ATP binding;GO:0016301//kinase activity;GO:0016740//transferase activity;GO:0042802//identical protein binding;GO:0042803//protein homodimerization activity;	ko05231(Choline metabolism in cancer);ko00564(Glycerophospholipid metabolism)	CHKA
ENSG00000130508	62.8558	0.591292628250785	0.49407080367322	0.508296136703533	0.128826336066036	0.0526482718035021	0.113800178099826	0.1827	-2.452	2.364e-13	1.405e-11	Down Regulation	2	1631887	1744852	-	11266	PXDN	GO:0001525;GO:0001654;GO:0001960;GO:0004601;GO:0005152;GO:0005201;GO:0005515;GO:0005576;GO:0005604;GO:0005615;GO:0005783;GO:0006955;GO:0006979;GO:0007155;GO:0009986;GO:0016491;GO:0016684;GO:0020037;GO:0030198;GO:0030199;GO:0031012;GO:0042744;GO:0043237;GO:0046872;GO:0051260;GO:0062023;GO:0070062;GO:0070207;GO:0070831;GO:0071711;GO:0098869;GO:0140825	K19511	EC:1.11.1.7	S;T;C	KOG2408;35AXH;38C9T;3BEQJ;3CRD4;3JAV6;4899T;495T1;4MAZI;4MY5Y	peroxidasin [Source:HGNC Symbol;Acc:HGNC:14966]	7837	Q92626	GO:0001525//angiogenesis;GO:0001654//eye development;GO:0001960//negative regulation of cytokine-mediated signaling pathway;GO:0006955//immune response;GO:0006979//response to oxidative stress;GO:0007155//cell adhesion;GO:0030198//extracellular matrix organization;GO:0030199//collagen fibril organization;GO:0042744//hydrogen peroxide catabolic process;GO:0051260//protein homooligomerization;GO:00…	GO:0005576//extracellular region;GO:0005604//basement membrane;GO:0005615//extracellular space;GO:0005783//endoplasmic reticulum;GO:0009986//cell surface;GO:0031012//extracellular matrix;GO:0062023//collagen-containing extracellular matrix;GO:0070062//extracellular exosome;	GO:0004601//peroxidase activity;GO:0005152//interleukin-1 receptor antagonist activity;GO:0005201//extracellular matrix structural constituent;GO:0005515//protein binding;GO:0016491//oxidoreductase activity;GO:0016684//oxidoreductase activity, acting on peroxide as acceptor;GO:0020037//heme binding;GO:0043237//laminin-1 binding;GO:0046872//metal ion binding;	-	PXDN
ENSG00000163545	203.984	4.37204367590129	5.14968843634071	4.89207776067232	1.74493450110831	2.06399235494881	2.19647080352279	0.4124	-1.278	2.899e-13	1.712e-11	Down Regulation	1	205302063	205321745	-	3391	NUAK2	GO:0000166;GO:0000287;GO:0004672;GO:0004674;GO:0005515;GO:0005524;GO:0005737;GO:0006468;GO:0006915;GO:0016301;GO:0016310;GO:0016740;GO:0030036;GO:0034504;GO:0035330;GO:0035556;GO:0042149;GO:0043066;GO:0046872;GO:0106310	K08800	EC:2.7.11.1	T	KOG0611;35KGB;38BH2;3BA9M;3CXYR;3J4C0;487UB;49634;4M6QS;4N1KH	NUAK family kinase 2 [Source:HGNC Symbol;Acc:HGNC:29558]	81788	Q9H093;B4E0Y5	GO:0006468//protein phosphorylation;GO:0006915//apoptotic process;GO:0016310//phosphorylation;GO:0030036//actin cytoskeleton organization;GO:0034504//protein localization to nucleus;GO:0035330//regulation of hippo signaling;GO:0035556//intracellular signal transduction;GO:0042149//cellular response to glucose starvation;GO:0043066//negative regulation of apoptotic process;	GO:0005737//cytoplasm;	GO:0000166//nucleotide binding;GO:0000287//magnesium ion binding;GO:0004672//protein kinase activity;GO:0004674//protein serine/threonine kinase activity;GO:0005515//protein binding;GO:0005524//ATP binding;GO:0016301//kinase activity;GO:0016740//transferase activity;GO:0046872//metal ion binding;GO:0106310//protein serine kinase activity;	-	NUAK2
ENSG00000182481	4448.45	51.1541824873255	46.7314057732905	48.390849496893	16.9548630854998	16.0182806591309	25.6721267361443	0.3949	-1.34	2.903e-13	1.712e-11	Down Regulation	17	68035636	68047364	+	7365	KPNA2	GO:0000018;GO:0000139;GO:0003723;GO:0005515;GO:0005634;GO:0005654;GO:0005737;GO:0005783;GO:0005789;GO:0005794;GO:0005829;GO:0006259;GO:0006606;GO:0006607;GO:0008139;GO:0015031;GO:0016020;GO:0042564;GO:0042826;GO:0043657;GO:0061608;GO:0075506;GO:0098892;GO:0098978;GO:0099527;GO:1903902	K15043	-	U	KOG0166;35BR5;38CKN;3BG2W;3CYCW;3J6EK;480V4;48X37;4M82R;4MSMK	karyopherin subunit alpha 2 [Source:HGNC Symbol;Acc:HGNC:6395]	3838	P52292	GO:0000018//regulation of DNA recombination;GO:0006259//DNA metabolic process;GO:0006606//protein import into nucleus;GO:0006607//NLS-bearing protein import into nucleus;GO:0015031//protein transport;GO:0075506//entry of viral genome into host nucleus through nuclear pore complex via importin;GO:0099527//postsynapse to nucleus signaling pathway;GO:1903902//positive regulation of viral life cycle;	GO:0000139//Golgi membrane;GO:0005634//nucleus;GO:0005654//nucleoplasm;GO:0005737//cytoplasm;GO:0005783//endoplasmic reticulum;GO:0005789//endoplasmic reticulum membrane;GO:0005794//Golgi apparatus;GO:0005829//cytosol;GO:0016020//membrane;GO:0042564//NLS-dependent protein nuclear import complex;GO:0043657//host cell;GO:0098892//extrinsic component of postsynaptic specialization membrane;GO:009897…	GO:0003723//RNA binding;GO:0005515//protein binding;GO:0008139//nuclear localization sequence binding;GO:0042826//histone deacetylase binding;GO:0061608//nuclear import signal receptor activity;	ko05207(Chemical carcinogenesis - receptor activation);ko05164(Influenza A);ko03013(Nucleocytoplasmic transport)	KPNA2
ENSG00000010810	255.739	0.351436690829841	0.65534797108993	0.414229812131179	2.99029990939468	5.45835060523937	1.80410036957616	7.2504	2.8581	2.943e-13	1.729e-11	Up Regulation	6	111660332	111873452	-	7411	FYN	GO:0000166;GO:0000304;GO:0001664;GO:0001764;GO:0002223;GO:0002250;GO:0002376;GO:0002862;GO:0003015;GO:0004672;GO:0004713;GO:0004715;GO:0005102;GO:0005515;GO:0005524;GO:0005634;GO:0005737;GO:0005739;GO:0005768;GO:0005829;GO:0005884;GO:0005886;GO:0006468;GO:0006816;GO:0007166;GO:0007169;GO:0007249;GO:0007411;GO:0007612;GO:0007631;GO:0008360;GO:0010629;GO:0010730;GO:0010976;GO:0014069;GO:0015631;GO:…	K05703	EC:2.7.10.2	T;K;L	KOG0197;35HYS;38E1B;3BAZR;3CTKV;3J90S;485RN;48WCB;4MCFV;4MYJF	FYN proto-oncogene, Src family tyrosine kinase [Source:HGNC Symbol;Acc:HGNC:4037]	2534	P06241	GO:0000304//response to singlet oxygen;GO:0001764//neuron migration;GO:0002223//stimulatory C-type lectin receptor signaling pathway;GO:0002250//adaptive immune response;GO:0002376//immune system process;GO:0002862//negative regulation of inflammatory response to antigenic stimulus;GO:0003015//heart process;GO:0006468//protein phosphorylation;GO:0006816//calcium ion transport;GO:0007166//cell sur…	GO:0005634//nucleus;GO:0005737//cytoplasm;GO:0005739//mitochondrion;GO:0005768//endosome;GO:0005829//cytosol;GO:0005884//actin filament;GO:0005886//plasma membrane;GO:0014069//postsynaptic density;GO:0016020//membrane;GO:0030425//dendrite;GO:0031234//extrinsic component of cytoplasmic side of plasma membrane;GO:0044297//cell body;GO:0045121//membrane raft;GO:0048471//perinuclear region of cytopla…	GO:0000166//nucleotide binding;GO:0001664//G protein-coupled receptor binding;GO:0004672//protein kinase activity;GO:0004713//protein tyrosine kinase activity;GO:0004715//non-membrane spanning protein tyrosine kinase activity;GO:0005102//signaling receptor binding;GO:0005515//protein binding;GO:0005524//ATP binding;GO:0015631//tubulin binding;GO:0016004//phospholipase activator activity;GO:001630…	ko05416(Viral myocarditis);ko05130(Pathogenic Escherichia coli infection);ko05020(Prion disease);ko04725(Cholinergic synapse);ko04664(Fc epsilon RI signaling pathway);ko04660(T cell receptor signaling pathway);ko04650(Natural killer cell mediated cytotoxicity);ko04611(Platelet activation);ko04520(Adherens junction);ko04510(Focal adhesion);ko04380(Osteoclast differentiation);ko04360(Axon guidance)…	FYN
ENSG00000155115	1591.78	133.18328585666	129.049703501836	117.109934656843	69.5192121828945	61.8895926561198	75.9658464514576	0.5397	-0.8897	2.988e-13	1.748e-11	Nodiff	6	110958706	110967890	+	921	GTF3C6	GO:0000127;GO:0000995;GO:0003677;GO:0005515;GO:0005634;GO:0005654;GO:0006383;GO:0016604;GO:0042791;GO:0042797	K15203	-	S;K	2RYMW;35D69;39XG9;3BNAH;3D3UN;3J3JG;487MK;495GZ;4MM3R;4MVCF	general transcription factor IIIC subunit 6 [Source:HGNC Symbol;Acc:HGNC:20872]	112495	Q969F1	GO:0006383//transcription by RNA polymerase III;GO:0042791//5S class rRNA transcription by RNA polymerase III;GO:0042797//tRNA transcription by RNA polymerase III;	GO:0000127//transcription factor TFIIIC complex;GO:0005634//nucleus;GO:0005654//nucleoplasm;GO:0016604//nuclear body;	GO:0000995//RNA polymerase III general transcription initiation factor activity;GO:0003677//DNA binding;GO:0005515//protein binding;	-	GTF3C6
ENSG00000157570	411.374	5.78817897482562	6.70563299559339	6.13523800575933	1.39228738915603	0.887632003865031	2.32469216813335	0.243	-2.041	3.074e-13	1.791e-11	Down Regulation	11	44726465	44932423	+	6014	TSPAN18	GO:0005887;GO:0016020;GO:0016021	K17353	-	S	KOG3882;3594D;38HTQ;3BFP7;3CXBB;3J92X;4872Q;497KY;4MDH4;4N6EA	tetraspanin 18 [Source:HGNC Symbol;Acc:HGNC:20660]	90139	Q96SJ8	-	GO:0005887//integral component of plasma membrane;GO:0016020//membrane;GO:0016021//integral component of membrane;	-	-	TSPAN18
ENSG00000149212	211.004	0.359857534498736	0.613906405106155	0.636232881194415	1.8628255968423	1.46910080068276	1.87574238583046	3.2147	1.6847	3.245e-13	1.883e-11	Up Regulation	11	95165513	95232541	-	10578	SESN3	GO:0005515;GO:0005634;GO:0005737;GO:0016239;GO:0016491;GO:0016684;GO:0031932;GO:0032868;GO:0034198;GO:0038203;GO:0042149;GO:0042593;GO:0046626;GO:0051896;GO:0061700;GO:0070728;GO:0071230;GO:0071233;GO:1901031;GO:1904262;GO:1990253	K10141	-	F;S	KOG3746;35KFF;38DSC;3BB0T;3CTXI;3J5D7;47ZEJ;48W0Z;4M6WA;4MWZC	sestrin 3 [Source:HGNC Symbol;Acc:HGNC:23060]	143686	P58005	GO:0016239//positive regulation of macroautophagy;GO:0032868//response to insulin;GO:0034198//cellular response to amino acid starvation;GO:0038203//TORC2 signaling;GO:0042149//cellular response to glucose starvation;GO:0042593//glucose homeostasis;GO:0046626//regulation of insulin receptor signaling pathway;GO:0051896//regulation of protein kinase B signaling;GO:0071230//cellular response to ami…	GO:0005634//nucleus;GO:0005737//cytoplasm;GO:0031932//TORC2 complex;GO:0061700//GATOR2 complex;	GO:0005515//protein binding;GO:0016491//oxidoreductase activity;GO:0016684//oxidoreductase activity, acting on peroxide as acceptor;GO:0070728//leucine binding;	ko04211(Longevity regulating pathway);ko04115(p53 signaling pathway)	SESN3
ENSG00000100302	253.983	6.34980990704492	6.80747316478231	7.10757800622185	1.60322680491259	0.825950120296961	2.32018922800938	0.2302	-2.119	3.483e-13	2.014e-11	Down Regulation	22	35540831	35553999	+	3447	RASD2	GO:0000166;GO:0001963;GO:0003924;GO:0005525;GO:0005886;GO:0007165;GO:0007626;GO:0016020;GO:0031681;GO:0033235;GO:0043949;GO:0045202;GO:0051897	K07844	-	S;I;G	KOG0395;35KS5;38HMX;3BHJJ;3D3CW;3JFRZ;48AZV;48XX8;4MAD8;4N3EX	RASD family member 2 [Source:HGNC Symbol;Acc:HGNC:18229]	23551	Q96D21	GO:0001963//synaptic transmission, dopaminergic;GO:0007165//signal transduction;GO:0007626//locomotory behavior;GO:0033235//positive regulation of protein sumoylation;GO:0043949//regulation of cAMP-mediated signaling;GO:0051897//positive regulation of protein kinase B signaling;	GO:0005886//plasma membrane;GO:0016020//membrane;GO:0045202//synapse;	GO:0000166//nucleotide binding;GO:0003924//GTPase activity;GO:0005525//GTP binding;GO:0031681//G-protein beta-subunit binding;	-	RASD2
ENSG00000172915	330.351	0.342766939125132	0.283709244328228	0.29439560390144	0.735895407624586	0.663934088908073	0.662331410695097	2.2105	1.1444	3.856e-13	2.22e-11	Up Regulation	13	34942270	35673022	+	37700	NBEA	GO:0005515;GO:0005634;GO:0005737;GO:0005802;GO:0005829;GO:0005886;GO:0008104;GO:0012505;GO:0016020;GO:0019901;GO:0061484	K24183	-	S;U	KOG1787;35DTG;38D1H;3BB6B;3CVKQ;3JJST;480RD;48WQQ;4M7NR;4MUC7	neurobeachin [Source:HGNC Symbol;Acc:HGNC:7648]	26960	Q8NFP9;B3KXQ8	GO:0008104//protein localization;GO:0061484//hematopoietic stem cell homeostasis;	GO:0005634//nucleus;GO:0005737//cytoplasm;GO:0005802//trans-Golgi network;GO:0005829//cytosol;GO:0005886//plasma membrane;GO:0012505//endomembrane system;GO:0016020//membrane;	GO:0005515//protein binding;GO:0019901//protein kinase binding;	-	NBEA
ENSG00000164104	3010.99	101.382892981259	92.0495413693604	95.8930801032123	40.5699362637255	40.1434849635429	55.4570673115729	0.4642	-1.107	3.914e-13	2.246e-11	Down Regulation	4	173331376	173334432	-	2401	HMGB2	GO:0000122;GO:0000400;GO:0000785;GO:0000793;GO:0000976;GO:0000987;GO:0001938;GO:0002376;GO:0002437;GO:0003677;GO:0003684;GO:0003690;GO:0003697;GO:0003713;GO:0003723;GO:0005515;GO:0005576;GO:0005615;GO:0005634;GO:0005654;GO:0005694;GO:0005730;GO:0005737;GO:0006265;GO:0006303;GO:0006310;GO:0006325;GO:0006334;GO:0006357;GO:0006935;GO:0006954;GO:0007283;GO:0007289;GO:0008134;GO:0008301;GO:0008584;GO:…	K11295	-	K;B	KOG0381;35EJ8;39V7D;3BI6Q;3D06X;3J2AM;48QDJ;49KZS;4M7DD;4MTDC	high mobility group box 2 [Source:HGNC Symbol;Acc:HGNC:5000]	3148	P26583	GO:0000122//negative regulation of transcription by RNA polymerase II;GO:0001938//positive regulation of endothelial cell proliferation;GO:0002376//immune system process;GO:0002437//inflammatory response to antigenic stimulus;GO:0006265//DNA topological change;GO:0006303//double-strand break repair via nonhomologous end joining;GO:0006310//DNA recombination;GO:0006325//chromatin organization;GO:0…	GO:0000785//chromatin;GO:0000793//condensed chromosome;GO:0005576//extracellular region;GO:0005615//extracellular space;GO:0005634//nucleus;GO:0005654//nucleoplasm;GO:0005694//chromosome;GO:0005730//nucleolus;GO:0005737//cytoplasm;GO:0032991//protein-containing complex;GO:0048471//perinuclear region of cytoplasm;	GO:0000400//four-way junction DNA binding;GO:0000976//transcription cis-regulatory region binding;GO:0000987//cis-regulatory region sequence-specific DNA binding;GO:0003677//DNA binding;GO:0003684//damaged DNA binding;GO:0003690//double-stranded DNA binding;GO:0003697//single-stranded DNA binding;GO:0003713//transcription coactivator activity;GO:0003723//RNA binding;GO:0005515//protein binding;GO…	-	HMGB2
ENSG00000101412	581.693	20.2021703429929	17.6898019530838	19.7956186603457	5.06335759961781	3.08695019402809	7.48953843398778	0.266	-1.91	4.118e-13	2.353e-11	Down Regulation	20	33675477	33686385	-	2690	E2F1	GO:0000077;GO:0000082;GO:0000083;GO:0000122;GO:0000228;GO:0000785;GO:0000976;GO:0000978;GO:0000981;GO:0000987;GO:0001216;GO:0003677;GO:0003700;GO:0005515;GO:0005634;GO:0005654;GO:0005667;GO:0005737;GO:0005813;GO:0006351;GO:0006355;GO:0006357;GO:0006915;GO:0007049;GO:0007283;GO:0008630;GO:0010628;GO:0019901;GO:0030900;GO:0032991;GO:0035189;GO:0043065;GO:0043276;GO:0043392;GO:0043433;GO:0043565;GO:…	K17454	-	K	KOG2577;35EV1;394N8;3BDJ6;3D25Q;3JEET;487T2;48ZDS;4M7Z4;4MZ9B	E2F transcription factor 1 [Source:HGNC Symbol;Acc:HGNC:3113]	1869	Q01094;Q9BSD8	GO:0000077//DNA damage checkpoint signaling;GO:0000082//G1/S transition of mitotic cell cycle;GO:0000083//regulation of transcription involved in G1/S transition of mitotic cell cycle;GO:0000122//negative regulation of transcription by RNA polymerase II;GO:0006351//transcription, DNA-templated;GO:0006355//regulation of transcription, DNA-templated;GO:0006357//regulation of transcription by RNA po…	GO:0000228//nuclear chromosome;GO:0000785//chromatin;GO:0005634//nucleus;GO:0005654//nucleoplasm;GO:0005667//transcription regulator complex;GO:0005737//cytoplasm;GO:0005813//centrosome;GO:0032991//protein-containing complex;GO:0035189//Rb-E2F complex;GO:0090575//RNA polymerase II transcription regulator complex;	GO:0000976//transcription cis-regulatory region binding;GO:0000978//RNA polymerase II cis-regulatory region sequence-specific DNA binding;GO:0000981//DNA-binding transcription factor activity, RNA polymerase II-specific;GO:0000987//cis-regulatory region sequence-specific DNA binding;GO:0001216//DNA-binding transcription activator activity;GO:0003677//DNA binding;GO:0003700//DNA-binding transcript…	ko05226(Gastric cancer);ko05225(Hepatocellular carcinoma);ko05224(Breast cancer);ko05223(Non-small cell lung cancer);ko05222(Small cell lung cancer);ko05220(Chronic myeloid leukemia);ko05219(Bladder cancer);ko05218(Melanoma);ko05215(Prostate cancer);ko05214(Glioma);ko05212(Pancreatic cancer);ko05207(Chemical carcinogenesis - receptor activation);ko05206(MicroRNAs in cancer);ko05200(Pathways in ca…	E2F1
ENSG00000143819	1378.18	19.0352924545739	24.4421650062893	22.2218439506981	42.7678821536219	37.5860052458369	43.7417716494049	1.8707	0.9036	4.159e-13	2.368e-11	Nodiff	1	225810124	225845563	+	2476	EPHX1	GO:0003824;GO:0004301;GO:0005515;GO:0005783;GO:0005789;GO:0006629;GO:0006725;GO:0006805;GO:0009636;GO:0014070;GO:0016020;GO:0016021;GO:0016787;GO:0016803;GO:0019369;GO:0019439;GO:0033961;GO:0043231;GO:0097176	K01253	EC:3.3.2.9	S;O;Q	KOG2565;35BHC;38FY7;3BB6M;3CZY0;3JBBN;4822N;498NB;4MG2G;4MW9W	epoxide hydrolase 1 [Source:HGNC Symbol;Acc:HGNC:3401]	2052	P07099;R4SBI6	GO:0006629//lipid metabolic process;GO:0006725//cellular aromatic compound metabolic process;GO:0006805//xenobiotic metabolic process;GO:0009636//response to toxic substance;GO:0014070//response to organic cyclic compound;GO:0019369//arachidonic acid metabolic process;GO:0019439//aromatic compound catabolic process;GO:0097176//epoxide metabolic process;	GO:0005783//endoplasmic reticulum;GO:0005789//endoplasmic reticulum membrane;GO:0016020//membrane;GO:0016021//integral component of membrane;GO:0043231//intracellular membrane-bounded organelle;	GO:0003824//catalytic activity;GO:0004301//epoxide hydrolase activity;GO:0005515//protein binding;GO:0016787//hydrolase activity;GO:0016803//ether hydrolase activity;GO:0033961//cis-stilbene-oxide hydrolase activity;	ko05208(Chemical carcinogenesis - reactive oxygen species);ko05207(Chemical carcinogenesis - receptor activation);ko05204(Chemical carcinogenesis - DNA adducts);ko04976(Bile secretion);ko00980(Metabolism of xenobiotics by cytochrome P450)	EPHX1
ENSG00000111912	2985.08	8.32482343077094	8.69190485972235	8.02119877597708	36.0828285249065	51.0296586227224	20.1028683934447	4.2726	2.0951	4.329e-13	2.455e-11	Up Regulation	6	125781161	125932034	+	7647	NCOA7	GO:0005515;GO:0005634;GO:0006357;GO:0006979;GO:0016922;GO:0030374;GO:0045944;GO:1900408;GO:1902083;GO:1903204	K25442	-	K;L	KOG2372;35IR1;38BSI;3BB4E;3CVQI;3JBBS;483TZ;48YTZ;4MDCE;4N5P4	nuclear receptor coactivator 7 [Source:HGNC Symbol;Acc:HGNC:21081]	135112	Q8NI08;Q8N3C8	GO:0006357//regulation of transcription by RNA polymerase II;GO:0006979//response to oxidative stress;GO:0045944//positive regulation of transcription by RNA polymerase II;GO:1900408//negative regulation of cellular response to oxidative stress;GO:1902083//negative regulation of peptidyl-cysteine S-nitrosylation;GO:1903204//negative regulation of oxidative stress-induced neuron death;	GO:0005634//nucleus;	GO:0005515//protein binding;GO:0016922//nuclear receptor binding;GO:0030374//nuclear receptor coactivator activity;	-	NCOA7
ENSG00000140961	273.419	0.720928202103677	0.559648158507437	0.573574768995575	4.45928758920794	8.16388276458735	2.13096629873448	7.9436	2.9898	4.422e-13	2.498e-11	Up Regulation	16	83931311	83966332	+	5558	OSGIN1	GO:0005515;GO:0005575;GO:0007165;GO:0008083;GO:0030154;GO:0030308;GO:0030334;GO:0042127;GO:0042981;GO:0043065	-	-	S;T	2QRUQ;35J5E;38DVN;3BEBM;3CUYN;3JBDQ;48169;497IP;4MEQT;4MYA9	oxidative stress induced growth inhibitor 1 [Source:HGNC Symbol;Acc:HGNC:30093]	29948	Q9UJX0	GO:0007165//signal transduction;GO:0030154//cell differentiation;GO:0030308//negative regulation of cell growth;GO:0030334//regulation of cell migration;GO:0042127//regulation of cell population proliferation;GO:0042981//regulation of apoptotic process;GO:0043065//positive regulation of apoptotic process;	GO:0005575//cellular_component;	GO:0005515//protein binding;GO:0008083//growth factor activity;	-	OSGIN1
ENSG00000265763	266.934	6.98019867809015	6.9842924038628	7.0520477697326	1.20660683207663	0.978437285211001	2.55247714599217	0.2212	-2.176	4.537e-13	2.553e-11	Down Regulation	10	47365496	47384293	-	3516	ZNF488	GO:0003677;GO:0005515;GO:0005634;GO:0006355;GO:0007399;GO:0014003;GO:0031643;GO:0045892;GO:0046872;GO:0048714	-	-	S;K	35KWI;39T3P;3BB0D;3D4N2;3J5FN;4835T;48VUJ;4M7TV;4N8D7	zinc finger protein 488 [Source:HGNC Symbol;Acc:HGNC:23535]	118738	Q96MN9	GO:0006355//regulation of transcription, DNA-templated;GO:0007399//nervous system development;GO:0014003//oligodendrocyte development;GO:0031643//positive regulation of myelination;GO:0045892//negative regulation of transcription, DNA-templated;GO:0048714//positive regulation of oligodendrocyte differentiation;	GO:0005634//nucleus;	GO:0003677//DNA binding;GO:0005515//protein binding;GO:0046872//metal ion binding;	-	ZNF488
ENSG00000164930	2261.31	22.8808379001282	25.2112166126781	23.6142856746474	40.0019339925768	39.4402230667578	38.177579500421	1.6249	0.7004	4.588e-13	2.572e-11	Nodiff	8	103298433	103332866	+	4065	FZD6	GO:0001736;GO:0001843;GO:0001942;GO:0004888;GO:0004930;GO:0005515;GO:0005783;GO:0005789;GO:0005886;GO:0005887;GO:0007165;GO:0007166;GO:0007186;GO:0009986;GO:0016020;GO:0016021;GO:0016055;GO:0016324;GO:0016327;GO:0017147;GO:0030168;GO:0030659;GO:0030901;GO:0031410;GO:0031625;GO:0033278;GO:0035567;GO:0035880;GO:0042472;GO:0042813;GO:0043433;GO:0045177;GO:0048105;GO:0060070;GO:0060071;GO:0090090;GO:…	K02376	-	M;T	KOG3577;35A1H;38C7N;3BBTS;3CSTD;3J2MT;47ZR4;48WMQ;4MFG9;4MXH3	frizzled class receptor 6 [Source:HGNC Symbol;Acc:HGNC:4044]	8323	O60353;A0A024R9E9	GO:0001736//establishment of planar polarity;GO:0001843//neural tube closure;GO:0001942//hair follicle development;GO:0007165//signal transduction;GO:0007166//cell surface receptor signaling pathway;GO:0007186//G protein-coupled receptor signaling pathway;GO:0016055//Wnt signaling pathway;GO:0030168//platelet activation;GO:0030901//midbrain development;GO:0033278//cell proliferation in midbrain;G…	GO:0005783//endoplasmic reticulum;GO:0005789//endoplasmic reticulum membrane;GO:0005886//plasma membrane;GO:0005887//integral component of plasma membrane;GO:0009986//cell surface;GO:0016020//membrane;GO:0016021//integral component of membrane;GO:0016324//apical plasma membrane;GO:0016327//apicolateral plasma membrane;GO:0030659//cytoplasmic vesicle membrane;GO:0031410//cytoplasmic vesicle;GO:004…	GO:0004888//transmembrane signaling receptor activity;GO:0004930//G protein-coupled receptor activity;GO:0005515//protein binding;GO:0017147//Wnt-protein binding;GO:0031625//ubiquitin protein ligase binding;GO:0042813//Wnt-activated receptor activity;	ko05226(Gastric cancer);ko05225(Hepatocellular carcinoma);ko05224(Breast cancer);ko05217(Basal cell carcinoma);ko05205(Proteoglycans in cancer);ko05200(Pathways in cancer);ko05165(Human papillomavirus infection);ko05022(Pathways of neurodegeneration - multiple diseases);ko05010(Alzheimer disease);ko04934(Cushing syndrome);ko04916(Melanogenesis);ko04550(Signaling pathways regulating pluripotency o…	FZD6
ENSG00000213462	365.716	2.26171325103277	2.81157481679961	2.46618260974536	6.24063071866855	4.75499459609542	6.30306617180841	2.2691	1.1821	5.106e-13	2.852e-11	Up Regulation	7	64990356	65006743	-	5027	ERV3-1	GO:0003674;GO:0008150	K24615	-	S;T	2SX29;35V3X;3AGW6;3BZJ8;3D2R6;3JEZX;48DA0;499GF;4MQIS;4N98I	endogenous retrovirus group 3 member 1, envelope [Source:HGNC Symbol;Acc:HGNC:3454]	2086	Q14264	GO:0008150//biological_process;	-	GO:0003674//molecular_function;	-	ERV3-1
ENSG00000012822	918.509	3.62505029508907	4.36049673020127	4.0869858326542	7.22705120615779	8.16577772442529	7.67083773580156	1.8953	0.9224	5.228e-13	2.898e-11	Nodiff	12	53708517	53727745	-	8898	CALCOCO1	GO:0000785;GO:0000976;GO:0000978;GO:0003682;GO:0003712;GO:0003713;GO:0005515;GO:0005634;GO:0005737;GO:0005829;GO:0006354;GO:0007165;GO:0008013;GO:0008022;GO:0010628;GO:0016055;GO:0030374;GO:0030518;GO:0043231;GO:0043565;GO:0045893;GO:0045944;GO:0046872;GO:0070016	K25828	-	K	2QR9J;35DM1;38D75;3BAB0;3D2H4;3JCA0;4837B;48X9V;4M5PU;4MWGI	calcium binding and coiled-coil domain 1 [Source:HGNC Symbol;Acc:HGNC:29306]	57658	Q9P1Z2;A0A024RAZ1	GO:0006354//DNA-templated transcription, elongation;GO:0007165//signal transduction;GO:0010628//positive regulation of gene expression;GO:0016055//Wnt signaling pathway;GO:0030518//intracellular steroid hormone receptor signaling pathway;GO:0045893//positive regulation of transcription, DNA-templated;GO:0045944//positive regulation of transcription by RNA polymerase II;	GO:0000785//chromatin;GO:0005634//nucleus;GO:0005737//cytoplasm;GO:0005829//cytosol;GO:0043231//intracellular membrane-bounded organelle;	GO:0000976//transcription cis-regulatory region binding;GO:0000978//RNA polymerase II cis-regulatory region sequence-specific DNA binding;GO:0003682//chromatin binding;GO:0003712//transcription coregulator activity;GO:0003713//transcription coactivator activity;GO:0005515//protein binding;GO:0008013//beta-catenin binding;GO:0008022//protein C-terminus binding;GO:0030374//nuclear receptor coactiva…	-	CALCOCO1
ENSG00000237649	1274.08	39.0608476586285	33.6969	38.7141795672644	7.99554653363877	7.4190867334125	15.6556745344843	0.2738	-1.869	5.23e-13	2.898e-11	Down Regulation	6	33391823	33409896	+	3030	KIFC1	GO:0000070;GO:0000166;GO:0003774;GO:0003777;GO:0005524;GO:0005634;GO:0005737;GO:0005768;GO:0005769;GO:0005815;GO:0005819;GO:0005856;GO:0005871;GO:0005874;GO:0007018;GO:0007049;GO:0007080;GO:0008017;GO:0016020;GO:0016887;GO:0051301;GO:0072686;GO:0090307	K10405	-	Z	KOG0239;359SK;38D7J;3BABC;3CTH1;3JC2E;4829D;494F7;4MH30;4N2TZ	kinesin family member C1 [Source:HGNC Symbol;Acc:HGNC:6389]	3833	Q9BW19;A0A024RCS7	GO:0000070//mitotic sister chromatid segregation;GO:0007018//microtubule-based movement;GO:0007049//cell cycle;GO:0007080//mitotic metaphase plate congression;GO:0051301//cell division;GO:0090307//mitotic spindle assembly;	GO:0005634//nucleus;GO:0005737//cytoplasm;GO:0005768//endosome;GO:0005769//early endosome;GO:0005815//microtubule organizing center;GO:0005819//spindle;GO:0005856//cytoskeleton;GO:0005871//kinesin complex;GO:0005874//microtubule;GO:0016020//membrane;GO:0072686//mitotic spindle;	GO:0000166//nucleotide binding;GO:0003774//cytoskeletal motor activity;GO:0003777//microtubule motor activity;GO:0005524//ATP binding;GO:0008017//microtubule binding;GO:0016887//ATP hydrolysis activity;	-	KIFC1
ENSG00000164211	3067.06	7.52530959928653	13.988277792641	9.69041543562899	61.8906984406971	62.9658547757606	27.3032830171027	4.8767	2.2859	5.249e-13	2.898e-11	Up Regulation	5	111496033	111512590	-	5684	STARD4	GO:0005515;GO:0005737;GO:0005783;GO:0005829;GO:0006869;GO:0008289;GO:0010879;GO:0015485;GO:0031410;GO:0032367;GO:0070508;GO:0070859;GO:0090205;GO:0120009;GO:0120020	-	-	S;I	KOG3845;35PIQ;39CI7;3BC0D;3CS0A;3JDPN;4896W;492RK;4MHEY;4MWN0	StAR related lipid transfer domain containing 4 [Source:HGNC Symbol;Acc:HGNC:18058]	134429	Q96DR4	GO:0006869//lipid transport;GO:0010879//cholesterol transport involved in cholesterol storage;GO:0032367//intracellular cholesterol transport;GO:0070508//cholesterol import;GO:0070859//positive regulation of bile acid biosynthetic process;GO:0090205//positive regulation of cholesterol metabolic process;GO:0120009//intermembrane lipid transfer;	GO:0005737//cytoplasm;GO:0005783//endoplasmic reticulum;GO:0005829//cytosol;GO:0031410//cytoplasmic vesicle;	GO:0005515//protein binding;GO:0008289//lipid binding;GO:0015485//cholesterol binding;GO:0120020//cholesterol transfer activity;	-	STARD4
ENSG00000092439	3817.92	13.0111584556662	12.5406599536327	13.1137491125364	21.3411055596302	23.0738306263799	21.8117086815465	1.6957	0.7619	5.333e-13	2.934e-11	Nodiff	15	50552473	50686797	-	12380	TRPM7	GO:0000166;GO:0001726;GO:0003779;GO:0004674;GO:0005216;GO:0005261;GO:0005262;GO:0005524;GO:0005886;GO:0005887;GO:0006468;GO:0006811;GO:0006812;GO:0006816;GO:0010961;GO:0012501;GO:0016020;GO:0016021;GO:0016301;GO:0016310;GO:0016340;GO:0016740;GO:0017022;GO:0030001;GO:0031032;GO:0046777;GO:0046872;GO:0051262;GO:0055085;GO:0070266;GO:0070588;GO:0072507;GO:0098655;GO:0106310	K04982	EC:2.7.11.1	-	-	transient receptor potential cation channel subfamily M member 7 [Source:HGNC Symbol;Acc:HGNC:17994]	54822	Q96QT4;A0A024R5V1	GO:0006468//protein phosphorylation;GO:0006811//ion transport;GO:0006812//cation transport;GO:0006816//calcium ion transport;GO:0010961//cellular magnesium ion homeostasis;GO:0012501//programmed cell death;GO:0016310//phosphorylation;GO:0016340//calcium-dependent cell-matrix adhesion;GO:0030001//metal ion transport;GO:0031032//actomyosin structure organization;GO:0046777//protein autophosphorylat…	GO:0001726//ruffle;GO:0005886//plasma membrane;GO:0005887//integral component of plasma membrane;GO:0016020//membrane;GO:0016021//integral component of membrane;	GO:0000166//nucleotide binding;GO:0003779//actin binding;GO:0004674//protein serine/threonine kinase activity;GO:0005216//ion channel activity;GO:0005261//cation channel activity;GO:0005262//calcium channel activity;GO:0005524//ATP binding;GO:0016301//kinase activity;GO:0016740//transferase activity;GO:0017022//myosin binding;GO:0046872//metal ion binding;GO:0106310//protein serine kinase activit…	ko04978(Mineral absorption);ko04621(NOD-like receptor signaling pathway);ko04218(Cellular senescence);ko04217(Necroptosis)	TRPM7
ENSG00000178385	220.042	0.563784995376443	0.670527278293973	0.598574864583347	1.59722807317523	1.67166541575312	1.33244336223721	2.4924	1.3175	5.687e-13	3.117e-11	Up Regulation	2	207821288	208025527	-	11638	PLEKHM3	GO:0005737;GO:0005794;GO:0005886;GO:0016020;GO:0045445;GO:0046872	-	-	S;T	KOG1829;358WI;38DQN;3BJJ4;3CXB1;3J93Z;47ZHG;4914R;4MGXV;4N0IZ	pleckstrin homology domain containing M3 [Source:HGNC Symbol;Acc:HGNC:34006]	389072	Q6ZWE6	GO:0045445//myoblast differentiation;	GO:0005737//cytoplasm;GO:0005794//Golgi apparatus;GO:0005886//plasma membrane;GO:0016020//membrane;	GO:0046872//metal ion binding;	-	PLEKHM3
ENSG00000128510	41.4262	0.835196597149089	1.37874190623668	0.954594671031731	0.0987241275201123	0.119885887850077	0.169672043013535	0.121	-3.047	5.767e-13	3.149e-11	Down Regulation	7	130293134	130324180	+	3958	CPA4	GO:0004180;GO:0004181;GO:0005575;GO:0005576;GO:0005615;GO:0006508;GO:0008233;GO:0008237;GO:0008270;GO:0016573;GO:0016787;GO:0046872	K08637	EC:3.4.17.-	O;E	KOG2650;35EIQ;38DUK;3BA6U;3CUQS;3J2BP;481VD;490AY;4M8Z9;4N7S0	carboxypeptidase A4 [Source:HGNC Symbol;Acc:HGNC:15740]	51200	Q9UI42;A4D1M3	GO:0006508//proteolysis;GO:0016573//histone acetylation;	GO:0005575//cellular_component;GO:0005576//extracellular region;GO:0005615//extracellular space;	GO:0004180//carboxypeptidase activity;GO:0004181//metallocarboxypeptidase activity;GO:0008233//peptidase activity;GO:0008237//metallopeptidase activity;GO:0008270//zinc ion binding;GO:0016787//hydrolase activity;GO:0046872//metal ion binding;	-	CPA4
ENSG00000164087	338.328	12.3564288117356	12.1427994513268	10.3325480414574	4.63951302179609	5.16450374526713	5.82589519212133	0.4431	-1.174	6.661e-13	3.624e-11	Down Regulation	3	52075226	52154690	-	2274	POC1A	GO:0000922;GO:0005515;GO:0005737;GO:0005813;GO:0005814;GO:0005815;GO:0005856;GO:0030030;GO:0036064;GO:0042995;GO:0060271	K16482	-	S;Z	2QSVJ;35GJ9;38CVK;3B94W;3CZM5;3JG17;484Q6;48WW2;4MAF4;4N3J3	POC1 centriolar protein A [Source:HGNC Symbol;Acc:HGNC:24488]	25886	Q8NBT0	GO:0030030//cell projection organization;GO:0060271//cilium assembly;	GO:0000922//spindle pole;GO:0005737//cytoplasm;GO:0005813//centrosome;GO:0005814//centriole;GO:0005815//microtubule organizing center;GO:0005856//cytoskeleton;GO:0036064//ciliary basal body;GO:0042995//cell projection;	GO:0005515//protein binding;	-	POC1A
ENSG00000113108	276.451	1.92907222801891	2.6914845185633	2.51911886526441	6.26425163968906	7.14918016376118	5.51472819155919	2.6391	1.4	6.854e-13	3.715e-11	Up Regulation	5	140558268	140564781	-	3609	APBB3	GO:0001540;GO:0005515;GO:0005634;GO:0005737;GO:0005829;GO:0006355;GO:0015629;GO:0016020;GO:0050714;GO:0050750	-	-	S;K	2QR5N;3591S;39SN5;3BGV0;3CXUV;3JATG;486Q5;48ZR0;4M5WT;4N52P	amyloid beta precursor protein binding family B member 3 [Source:HGNC Symbol;Acc:HGNC:20708]	10307	O95704;Q59EH2;Q96DX9	GO:0006355//regulation of transcription, DNA-templated;GO:0050714//positive regulation of protein secretion;	GO:0005634//nucleus;GO:0005737//cytoplasm;GO:0005829//cytosol;GO:0015629//actin cytoskeleton;GO:0016020//membrane;	GO:0001540//amyloid-beta binding;GO:0005515//protein binding;GO:0050750//low-density lipoprotein particle receptor binding;	-	APBB3
ENSG00000102900	955.508	6.54280907850357	6.36812414224622	6.57603613029043	3.32228669079113	2.63426146262967	3.72684414360172	0.4902	-1.029	6.919e-13	3.736e-11	Down Regulation	16	56730118	56850286	+	11123	NUP93	GO:0005515;GO:0005634;GO:0005635;GO:0005643;GO:0005813;GO:0005829;GO:0006606;GO:0006913;GO:0006998;GO:0015031;GO:0016020;GO:0016973;GO:0017056;GO:0031965;GO:0034399;GO:0051028;GO:0051292;GO:0060391;GO:0060395	K14309	-	D;U	KOG2168;35APP;38B6B;3BG2V;3CX76;3JBYM;483CR;48X4U;4MFXX;4MTYA	nucleoporin 93 [Source:HGNC Symbol;Acc:HGNC:28958]	9688	Q8N1F7	GO:0006606//protein import into nucleus;GO:0006913//nucleocytoplasmic transport;GO:0006998//nuclear envelope organization;GO:0015031//protein transport;GO:0016973//poly(A)+ mRNA export from nucleus;GO:0051028//mRNA transport;GO:0051292//nuclear pore complex assembly;GO:0060391//positive regulation of SMAD protein signal transduction;GO:0060395//SMAD protein signal transduction;	GO:0005634//nucleus;GO:0005635//nuclear envelope;GO:0005643//nuclear pore;GO:0005813//centrosome;GO:0005829//cytosol;GO:0016020//membrane;GO:0031965//nuclear membrane;GO:0034399//nuclear periphery;	GO:0005515//protein binding;GO:0017056//structural constituent of nuclear pore;	ko05014(Amyotrophic lateral sclerosis);ko03013(Nucleocytoplasmic transport)	NUP93
ENSG00000105323	2763.2	30.4665971369739	29.0673494198915	29.0634647333316	16.9942128451442	15.5575053040299	19.0607859364842	0.5752	-0.7978	7.295e-13	3.925e-11	Nodiff	19	41262496	41307787	+	6691	HNRNPUL1	GO:0003723;GO:0005515;GO:0005634;GO:0005654;GO:0006396;GO:0009615;GO:0019899;GO:1990904	K15047	-	A;L	KOG2242;35EFJ;38FNX;3BD0H;3CRCQ;3JAXF;481JN;4939K;4MDZF;4N5E5	heterogeneous nuclear ribonucleoprotein U like 1 [Source:HGNC Symbol;Acc:HGNC:17011]	11100	Q9BUJ2	GO:0006396//RNA processing;GO:0009615//response to virus;	GO:0005634//nucleus;GO:0005654//nucleoplasm;GO:1990904//ribonucleoprotein complex;	GO:0003723//RNA binding;GO:0005515//protein binding;GO:0019899//enzyme binding;	ko05164(Influenza A)	HNRNPUL1
ENSG00000169439	887.074	14.5574583448699	18.2792818706229	15.9442685474634	8.17365880234061	7.46502475737177	9.41777281933866	0.5083	-0.9763	7.469e-13	4.004e-11	Nodiff	8	96493813	96611790	+	4084	SDC2	GO:0005515;GO:0005788;GO:0005796;GO:0005886;GO:0007399;GO:0008150;GO:0009986;GO:0016020;GO:0016021;GO:0016477;GO:0030154;GO:0030165;GO:0042802;GO:0043202;GO:0048813;GO:0048814;GO:0062023	K16336	-	S;T	2RZ6V;35MHK;39HJY;3BBZS;3CY9M;3JAH7;4890Q;48ZSK;4M9BP;4MSYA	syndecan 2 [Source:HGNC Symbol;Acc:HGNC:10659]	6383	P34741;A0A024R9D1	GO:0007399//nervous system development;GO:0008150//biological_process;GO:0016477//cell migration;GO:0030154//cell differentiation;GO:0048813//dendrite morphogenesis;GO:0048814//regulation of dendrite morphogenesis;	GO:0005788//endoplasmic reticulum lumen;GO:0005796//Golgi lumen;GO:0005886//plasma membrane;GO:0009986//cell surface;GO:0016020//membrane;GO:0016021//integral component of membrane;GO:0043202//lysosomal lumen;GO:0062023//collagen-containing extracellular matrix;	GO:0005515//protein binding;GO:0030165//PDZ domain binding;GO:0042802//identical protein binding;	ko05418(Fluid shear stress and atherosclerosis);ko05205(Proteoglycans in cancer);ko05144(Malaria);ko04514(Cell adhesion molecules)	SDC2
ENSG00000254726	274.329	3.69322297144596	3.31183	3.22453	1.38897231859105	0.953912237819072	1.54688687084791	0.3744	-1.417	7.587e-13	4.052e-11	Down Regulation	1	156072013	156082465	-	6591	MEX3A	GO:0000932;GO:0003676;GO:0003723;GO:0005634;GO:0005737;GO:0005829;GO:0046872	K15686	EC:2.3.2.27	S;O	KOG2113;3595E;39TJN;3B9BH;3CY96;3J5IM;487YG;496QB;4MIF8;4MVAH	mex-3 RNA binding family member A [Source:HGNC Symbol;Acc:HGNC:33482]	92312	A1L020	-	GO:0000932//P-body;GO:0005634//nucleus;GO:0005737//cytoplasm;GO:0005829//cytosol;	GO:0003676//nucleic acid binding;GO:0003723//RNA binding;GO:0046872//metal ion binding;	-	MEX3A
ENSG00000173848	757.771	12.3901473118182	11.9638200868117	12.6204025707639	5.66185566442623	4.5462921461668	6.8461318639266	0.4547	-1.137	7.615e-13	4.053e-11	Down Regulation	10	5412557	5459056	+	4762	NET1	GO:0001558;GO:0005085;GO:0005515;GO:0005634;GO:0005737;GO:0005829;GO:0007165;GO:0035025;GO:0035556;GO:0043065;GO:0043547;GO:0050790;GO:0051056;GO:0051451;GO:0070301;GO:0071479	K20683	-	T	KOG4305;35B94;38CXM;3BEYI;3CTA1;3J3IW;483Z7;48YU3;4MA7K;4N2XT	neuroepithelial cell transforming 1 [Source:HGNC Symbol;Acc:HGNC:14592]	10276	Q7Z628;Q5SQI5	GO:0001558//regulation of cell growth;GO:0007165//signal transduction;GO:0035025//positive regulation of Rho protein signal transduction;GO:0035556//intracellular signal transduction;GO:0043065//positive regulation of apoptotic process;GO:0043547//positive regulation of GTPase activity;GO:0050790//regulation of catalytic activity;GO:0051056//regulation of small GTPase mediated signal transduction…	GO:0005634//nucleus;GO:0005737//cytoplasm;GO:0005829//cytosol;	GO:0005085//guanyl-nucleotide exchange factor activity;GO:0005515//protein binding;	-	NET1
ENSG00000093009	300.525	10.3940392437315	8.11779	8.52429721297717	2.02441765548581	1.59337926162056	3.52612048215954	0.2591	-1.948	7.86e-13	4.168e-11	Down Regulation	22	19479457	19520612	+	2978	CDC45	GO:0000076;GO:0000727;GO:0003682;GO:0003688;GO:0003697;GO:0005515;GO:0005634;GO:0005654;GO:0005737;GO:0005813;GO:0006260;GO:0006268;GO:0006270;GO:0007049;GO:0031261;GO:0036064;GO:0071162;GO:1902977	K06628	-	S;L	KOG2475;3598Y;38DF5;3BGTT;3CREP;3J1ZS;4839H;48WEG;4M9N8;4MXEZ	cell division cycle 45 [Source:HGNC Symbol;Acc:HGNC:1739]	8318	O75419	GO:0000076//DNA replication checkpoint signaling;GO:0000727//double-strand break repair via break-induced replication;GO:0006260//DNA replication;GO:0006268//DNA unwinding involved in DNA replication;GO:0006270//DNA replication initiation;GO:0007049//cell cycle;GO:1902977//mitotic DNA replication preinitiation complex assembly;	GO:0005634//nucleus;GO:0005654//nucleoplasm;GO:0005737//cytoplasm;GO:0005813//centrosome;GO:0031261//DNA replication preinitiation complex;GO:0036064//ciliary basal body;GO:0071162//CMG complex;	GO:0003682//chromatin binding;GO:0003688//DNA replication origin binding;GO:0003697//single-stranded DNA binding;GO:0005515//protein binding;	ko04110(Cell cycle)	CDC45
ENSG00000011426	7405.07	127.475412482327	94.9275550603272	110.560297820563	22.4979867024791	18.8216895706703	43.8362475259151	0.2507	-1.996	8.065e-13	4.262e-11	Down Regulation	7	36389821	36453791	+	5997	ANLN	GO:0000281;GO:0000915;GO:0000921;GO:0002244;GO:0003779;GO:0005515;GO:0005634;GO:0005654;GO:0005737;GO:0005826;GO:0005829;GO:0005856;GO:0005938;GO:0007049;GO:0007096;GO:0015629;GO:0030496;GO:0031106;GO:0032059;GO:0042995;GO:0045296;GO:0051301;GO:0090521;GO:1904172	K18621	-	S;Z;D	KOG3640;35H9K;38FZE;3BIFS;3CVII;3J76N;487CI;490I0;4MDE3;4N1TX	anillin, actin binding protein [Source:HGNC Symbol;Acc:HGNC:14082]	54443	Q9NQW6;A0A024RA49	GO:0000281//mitotic cytokinesis;GO:0000915//actomyosin contractile ring assembly;GO:0000921//septin ring assembly;GO:0002244//hematopoietic progenitor cell differentiation;GO:0007049//cell cycle;GO:0007096//regulation of exit from mitosis;GO:0031106//septin ring organization;GO:0051301//cell division;GO:0090521//glomerular visceral epithelial cell migration;GO:1904172//positive regulation of bleb…	GO:0005634//nucleus;GO:0005654//nucleoplasm;GO:0005737//cytoplasm;GO:0005826//actomyosin contractile ring;GO:0005829//cytosol;GO:0005856//cytoskeleton;GO:0005938//cell cortex;GO:0015629//actin cytoskeleton;GO:0030496//midbody;GO:0032059//bleb;GO:0042995//cell projection;	GO:0003779//actin binding;GO:0005515//protein binding;GO:0045296//cadherin binding;	-	ANLN
ENSG00000128872	118.96	0.263499413308351	0.334153767146891	0.24439105484758	0.755840142743336	0.895202244710605	1.00567118846906	3.1202	1.6416	8.128e-13	4.28e-11	Up Regulation	15	51751597	51816363	+	11595	TMOD2	GO:0003779;GO:0005515;GO:0005523;GO:0005737;GO:0005856;GO:0005865;GO:0006936;GO:0007015;GO:0007270;GO:0007399;GO:0007611;GO:0030016;GO:0030239;GO:0045202;GO:0045745;GO:0051694	K10370	-	Z;T	KOG3735;35HYU;38DPW;3B96P;3CXCH;3J6E3;486RS;48W7N;4MBEF;4MVC9	tropomodulin 2 [Source:HGNC Symbol;Acc:HGNC:11872]	29767	Q9NZR1	GO:0006936//muscle contraction;GO:0007015//actin filament organization;GO:0007270//neuron-neuron synaptic transmission;GO:0007399//nervous system development;GO:0007611//learning or memory;GO:0030239//myofibril assembly;GO:0045745//positive regulation of G protein-coupled receptor signaling pathway;GO:0051694//pointed-end actin filament capping;	GO:0005737//cytoplasm;GO:0005856//cytoskeleton;GO:0005865//striated muscle thin filament;GO:0030016//myofibril;GO:0045202//synapse;	GO:0003779//actin binding;GO:0005515//protein binding;GO:0005523//tropomyosin binding;	-	TMOD2
ENSG00000147408	189.831	2.61851523186845	2.00921644474925	1.95702773705641	0.570502162783003	0.427442985555608	0.839932394177566	0.2738	-1.869	8.512e-13	4.466e-11	Down Regulation	8	19404161	19758029	-	7632	CSGALNACT1	GO:0000139;GO:0001958;GO:0005515;GO:0005794;GO:0008376;GO:0008955;GO:0015014;GO:0015020;GO:0016020;GO:0016021;GO:0016740;GO:0019276;GO:0030166;GO:0030173;GO:0030198;GO:0030204;GO:0030206;GO:0030210;GO:0032580;GO:0046398;GO:0046872;GO:0047237;GO:0047238;GO:0050650;GO:0050651;GO:0050653;GO:0051216	K00746	-	M;G	KOG3588;35IR9;38DJN;3BAVK;3CYIJ;3JD3F;48776;48XH5;4MC4N;4MSD3	chondroitin sulfate N- acetylgalactosaminyltransferase 1 [Source:HGNC Symbol;Acc:HGNC:24290]	55790	Q8TDX6	GO:0001958//endochondral ossification;GO:0015014//heparan sulfate proteoglycan biosynthetic process, polysaccharide chain biosynthetic process;GO:0019276//UDP-N-acetylgalactosamine metabolic process;GO:0030166//proteoglycan biosynthetic process;GO:0030198//extracellular matrix organization;GO:0030204//chondroitin sulfate metabolic process;GO:0030206//chondroitin sulfate biosynthetic process;GO:00…	GO:0000139//Golgi membrane;GO:0005794//Golgi apparatus;GO:0016020//membrane;GO:0016021//integral component of membrane;GO:0030173//integral component of Golgi membrane;GO:0032580//Golgi cisterna membrane;	GO:0005515//protein binding;GO:0008376//acetylgalactosaminyltransferase activity;GO:0008955//peptidoglycan glycosyltransferase activity;GO:0015020//glucuronosyltransferase activity;GO:0016740//transferase activity;GO:0046872//metal ion binding;GO:0047237//glucuronylgalactosylproteoglycan 4-beta-N-acetylgalactosaminyltransferase activity;GO:0047238//glucuronosyl-N-acetylgalactosaminyl-proteoglycan…	ko00532(Glycosaminoglycan biosynthesis - chondroitin sulfate / dermatan sulfate)	CSGALNACT1
ENSG00000101104	1629.56	10.7512379674871	10.0388300433227	11.246	28.0212587042962	29.2574328014731	20.3584215568121	2.4039	1.2654	8.893e-13	4.649e-11	Up Regulation	20	44910060	44959035	+	5050	PABPC1L	GO:0001556;GO:0003676;GO:0003723;GO:0003730;GO:0005634;GO:0005737;GO:0005829;GO:0006338;GO:0006378;GO:0008143;GO:0008266;GO:0010494;GO:0045815;GO:0051647;GO:0070062;GO:1990904	K13126	-	A;J	KOG0123;35FCT;38F9F;3BIS6;3CUNM;3J4QX;48B27;4935H;4MFVX;4MW6R	poly(A) binding protein cytoplasmic 1 like [Source:HGNC Symbol;Acc:HGNC:15797]	80336	-	GO:0001556//oocyte maturation;GO:0006338//chromatin remodeling;GO:0006378//mRNA polyadenylation;GO:0045815//epigenetic maintenance of chromatin in transcription-competent conformation;GO:0051647//nucleus localization;	GO:0005634//nucleus;GO:0005737//cytoplasm;GO:0005829//cytosol;GO:0010494//cytoplasmic stress granule;GO:0070062//extracellular exosome;GO:1990904//ribonucleoprotein complex;	GO:0003676//nucleic acid binding;GO:0003723//RNA binding;GO:0003730//mRNA 3'-UTR binding;GO:0008143//poly(A) binding;GO:0008266//poly(U) RNA binding;	ko03018(RNA degradation);ko03015(mRNA surveillance pathway)	-
ENSG00000111665	536.093	10.2554622574937	8.74650806218469	10.3938672855719	2.07085080394558	1.78706514101913	3.99165739724935	0.2621	-1.932	9.052e-13	4.708e-11	Down Regulation	12	6844793	6851292	-	4879	CDCA3	GO:0005515;GO:0005737;GO:0005829;GO:0005912;GO:0007049;GO:0008150;GO:0016567;GO:0051301	-	-	S	2S7V2;35HIU;39YP7;3BPXT;3D1I7;3JEEF;489MN;48XP0;4M8K7;4MS44	cell division cycle associated 3 [Source:HGNC Symbol;Acc:HGNC:14624]	83461	Q99618	GO:0007049//cell cycle;GO:0008150//biological_process;GO:0016567//protein ubiquitination;GO:0051301//cell division;	GO:0005737//cytoplasm;GO:0005829//cytosol;GO:0005912//adherens junction;	GO:0005515//protein binding;	-	CDCA3
ENSG00000102409	122.093	0.648986491082012	0.91505587063617	0.764944467357101	9.36030283965733	16.5011000000353	3.21076595697633	12.5484	3.6494	9.069e-13	4.708e-11	Up Regulation	X	103215108	103217246	+	1312	BEX4	GO:0000922;GO:0005515;GO:0005634;GO:0005654;GO:0005737;GO:0005829;GO:0005856;GO:0005874;GO:0007059;GO:0030334;GO:0042127;GO:0042826;GO:0043014;GO:1904428	-	-	S;Z	2TDUR;35QEC;3A4KF;3BRKF;3D795;3JHAQ;48F2B;49C2C;4MJGF;4N6M1	brain expressed X-linked 4 [Source:HGNC Symbol;Acc:HGNC:25475]	56271	Q9NWD9	GO:0007059//chromosome segregation;GO:0030334//regulation of cell migration;GO:0042127//regulation of cell population proliferation;GO:1904428//negative regulation of tubulin deacetylation;	GO:0000922//spindle pole;GO:0005634//nucleus;GO:0005654//nucleoplasm;GO:0005737//cytoplasm;GO:0005829//cytosol;GO:0005856//cytoskeleton;GO:0005874//microtubule;	GO:0005515//protein binding;GO:0042826//histone deacetylase binding;GO:0043014//alpha-tubulin binding;	-	BEX4
ENSG00000121152	1211.94	18.5576364537503	15.6666411207311	15.8751500333764	3.12156576233123	2.88184975987724	6.6414626811344	0.2477	-2.014	9.945e-13	5.145e-11	Down Regulation	2	96335766	96377091	+	6545	NCAPH	GO:0000794;GO:0000796;GO:0003682;GO:0005515;GO:0005634;GO:0005654;GO:0005694;GO:0005737;GO:0005829;GO:0007049;GO:0007076;GO:0007143;GO:0010032;GO:0016020;GO:0030261;GO:0045132;GO:0051301;GO:0051309;GO:0051984;GO:1905820;GO:1905821	K06676	-	D;B	KOG2328;35KJ4;38HEG;3BF8V;3CUBK;3JDUA;4862R;48VVV;4MDSR;4MWH4	non-SMC condensin I complex subunit H [Source:HGNC Symbol;Acc:HGNC:1112]	23397	Q15003	GO:0007049//cell cycle;GO:0007076//mitotic chromosome condensation;GO:0007143//female meiotic nuclear division;GO:0010032//meiotic chromosome condensation;GO:0030261//chromosome condensation;GO:0045132//meiotic chromosome segregation;GO:0051301//cell division;GO:0051309//female meiosis chromosome separation;GO:0051984//positive regulation of chromosome segregation;GO:1905820//positive regulation …	GO:0000794//condensed nuclear chromosome;GO:0000796//condensin complex;GO:0005634//nucleus;GO:0005654//nucleoplasm;GO:0005694//chromosome;GO:0005737//cytoplasm;GO:0005829//cytosol;GO:0016020//membrane;	GO:0003682//chromatin binding;GO:0005515//protein binding;	-	NCAPH
ENSG00000116649	1501.67	54.8729990471977	56.1264719408426	55.2018214490505	36.3399358320589	32.945009107996	33.7167032626937	0.6132	-0.7055	1.003e-12	5.168e-11	Nodiff	1	11054584	11060020	-	1894	SRM	GO:0003824;GO:0004766;GO:0005515;GO:0005829;GO:0006595;GO:0006596;GO:0008295;GO:0016740;GO:0042802;GO:0042803;GO:1990830	K00797	EC:2.5.1.16	H;E	KOG1562;35GV8;39J87;3BCX8;3D093;3JCNW;4873X;48XN6;4MFBE;4N4HM	spermidine synthase [Source:HGNC Symbol;Acc:HGNC:11296]	6723	P19623	GO:0006595//polyamine metabolic process;GO:0006596//polyamine biosynthetic process;GO:0008295//spermidine biosynthetic process;GO:1990830//cellular response to leukemia inhibitory factor;	GO:0005829//cytosol;	GO:0003824//catalytic activity;GO:0004766//spermidine synthase activity;GO:0005515//protein binding;GO:0016740//transferase activity;GO:0042802//identical protein binding;GO:0042803//protein homodimerization activity;	ko00480(Glutathione metabolism);ko00330(Arginine and proline metabolism);ko00270(Cysteine and methionine metabolism)	SRM
ENSG00000172927	465.882	18.9286911460725	11.617329173549	16.1269377487937	3.74386463650444	5.56483504538152	3.24348271634266	0.2664	-1.908	1.06e-12	5.444e-11	Down Regulation	11	69294151	69341682	+	2654	MYEOV	GO:0005515	-	-	S	2TE93;35T2C;399TH;3CDXY;3DVAC;3JM86;48NMZ;49JPT;4MKUJ;4MY00	myeloma overexpressed [Source:HGNC Symbol;Acc:HGNC:7563]	26579	Q96EZ4;A0A024R5F1;A8K256	-	-	GO:0005515//protein binding;	-	MYEOV
ENSG00000278259	897.97	5.61327289032199	4.54198423025907	5.41491901084423	2.51094003403204	2.40484836270865	2.8022224306536	0.4891	-1.032	1.064e-12	5.448e-11	Down Regulation	17	36495636	36543435	-	13072	MYO19	GO:0000146;GO:0000166;GO:0003774;GO:0003779;GO:0005515;GO:0005524;GO:0005737;GO:0005739;GO:0005741;GO:0005829;GO:0005856;GO:0007015;GO:0015629;GO:0016020;GO:0016459;GO:0016887;GO:0030050;GO:0032027;GO:0032465;GO:0034642;GO:0051015;GO:0060002;GO:0090140	K25838	-	Z	KOG0160;35MVS;39P64;3BF3S;3D136;3J9GI;47YY7;48UVM;4M9P4;4MXIE	myosin XIX [Source:HGNC Symbol;Acc:HGNC:26234]	80179	Q96H55;B7Z1T7;B4E218	GO:0007015//actin filament organization;GO:0030050//vesicle transport along actin filament;GO:0032465//regulation of cytokinesis;GO:0034642//mitochondrion migration along actin filament;GO:0090140//regulation of mitochondrial fission;	GO:0005737//cytoplasm;GO:0005739//mitochondrion;GO:0005741//mitochondrial outer membrane;GO:0005829//cytosol;GO:0005856//cytoskeleton;GO:0015629//actin cytoskeleton;GO:0016020//membrane;GO:0016459//myosin complex;	GO:0000146//microfilament motor activity;GO:0000166//nucleotide binding;GO:0003774//cytoskeletal motor activity;GO:0003779//actin binding;GO:0005515//protein binding;GO:0005524//ATP binding;GO:0016887//ATP hydrolysis activity;GO:0032027//myosin light chain binding;GO:0051015//actin filament binding;GO:0060002//plus-end directed microfilament motor activity;	-	MYO19
ENSG00000164597	1280.23	6.12585709013506	5.57598889945356	5.77209971980635	11.1682771482559	12.5238670672279	10.6659453608452	1.9471	0.9613	1.1e-12	5.611e-11	Nodiff	7	107201372	107564261	-	8397	COG5	GO:0000139;GO:0000301;GO:0003674;GO:0005515;GO:0005654;GO:0005737;GO:0005794;GO:0005829;GO:0006891;GO:0007030;GO:0015031;GO:0016020;GO:0017119;GO:0032588;GO:0048219;GO:0070085	K20292	-	J;U	KOG2211;35BNP;38E8F;3BHF2;3CX8J;3J9D5;47ZAF;48WPM;4MFAD;4MY3P	component of oligomeric golgi complex 5 [Source:HGNC Symbol;Acc:HGNC:14857]	10466	Q9UP83	GO:0000301//retrograde transport, vesicle recycling within Golgi;GO:0006891//intra-Golgi vesicle-mediated transport;GO:0007030//Golgi organization;GO:0015031//protein transport;GO:0048219//inter-Golgi cisterna vesicle-mediated transport;GO:0070085//glycosylation;	GO:0000139//Golgi membrane;GO:0005654//nucleoplasm;GO:0005737//cytoplasm;GO:0005794//Golgi apparatus;GO:0005829//cytosol;GO:0016020//membrane;GO:0017119//Golgi transport complex;GO:0032588//trans-Golgi network membrane;	GO:0003674//molecular_function;GO:0005515//protein binding;	-	COG5
ENSG00000275395	405.217	0.575795582079453	0.896808794861864	0.801657719068349	2.40754465670698	3.7754550564313	2.15734876925453	3.6655	1.874	1.123e-12	5.712e-11	Up Regulation	19	39863323	39934626	-	12961	FCGBP	GO:0005515	-	-	S;W;V	KOG1216;35II4;38BA2;3BHBM;3CSSV;3J7NE;4802J;48VKX;4M8XK;4N5KZ	Fc gamma binding protein [Source:HGNC Symbol;Acc:HGNC:13572]	8857	Q9Y6R7	-	-	GO:0005515//protein binding;	-	FCGBP
ENSG00000105612	886.444	6.8062231727284	9.55056748027569	7.96074	18.5052303799453	19.631947335562	16.257996564679	2.2237	1.153	1.154e-12	5.844e-11	Up Regulation	19	12875209	12881595	-	3834	DNASE2	GO:0000737;GO:0003677;GO:0004518;GO:0004519;GO:0004520;GO:0004531;GO:0005764;GO:0006259;GO:0006308;GO:0006309;GO:0006915;GO:0016787;GO:0043353;GO:0050776;GO:0070062;GO:0090305	K01158	EC:3.1.22.1	S;L	KOG3825;35CZ4;39TVM;3BE4Y;3D0V1;3J381;480VD;48WJA;4MIUY;4N40G	deoxyribonuclease 2, lysosomal [Source:HGNC Symbol;Acc:HGNC:2960]	1777	O00115;A0A024R7F4	GO:0000737//DNA catabolic process, endonucleolytic;GO:0006259//DNA metabolic process;GO:0006308//DNA catabolic process;GO:0006309//apoptotic DNA fragmentation;GO:0006915//apoptotic process;GO:0043353//enucleate erythrocyte differentiation;GO:0050776//regulation of immune response;GO:0090305//nucleic acid phosphodiester bond hydrolysis;	GO:0005764//lysosome;GO:0070062//extracellular exosome;	GO:0003677//DNA binding;GO:0004518//nuclease activity;GO:0004519//endonuclease activity;GO:0004520//endodeoxyribonuclease activity;GO:0004531//deoxyribonuclease II activity;GO:0016787//hydrolase activity;	ko04142(Lysosome)	DNASE2
ENSG00000089723	228.628	5.31452937479812	3.43559336034954	5.02520462659027	1.38204467127306	1.63633212275821	1.42514914318042	0.3185	-1.651	1.178e-12	5.931e-11	Down Regulation	14	94026340	94048930	+	4241	OTUB2	GO:0004843;GO:0005515;GO:0005634;GO:0006508;GO:0008233;GO:0008234;GO:0016579;GO:0016787;GO:0035871;GO:0043130;GO:0070536;GO:0071108;GO:1901315;GO:2000780	K09603	EC:3.4.19.12	O	KOG3991;35DJU;38D99;3BJQN;3CUQQ;3JG4D;483PM;4970C;4M7Y5;4N5GM	OTU deubiquitinase, ubiquitin aldehyde binding 2 [Source:HGNC Symbol;Acc:HGNC:20351]	78990	Q96DC9	GO:0006508//proteolysis;GO:0016579//protein deubiquitination;GO:0035871//protein K11-linked deubiquitination;GO:0070536//protein K63-linked deubiquitination;GO:0071108//protein K48-linked deubiquitination;GO:1901315//negative regulation of histone H2A K63-linked ubiquitination;GO:2000780//negative regulation of double-strand break repair;	GO:0005634//nucleus;	GO:0004843//thiol-dependent deubiquitinase;GO:0005515//protein binding;GO:0008233//peptidase activity;GO:0008234//cysteine-type peptidase activity;GO:0016787//hydrolase activity;GO:0043130//ubiquitin binding;	-	OTUB2
ENSG00000079616	973.936	11.9958847686232	10.7177306940407	12.0147	3.30926391622575	2.68065112797872	5.36506963233074	0.3214	-1.638	1.179e-12	5.931e-11	Down Regulation	16	29790727	29805385	+	7169	KIF22	GO:0000166;GO:0000278;GO:0000776;GO:0000785;GO:0003677;GO:0003774;GO:0003777;GO:0005515;GO:0005524;GO:0005634;GO:0005737;GO:0005819;GO:0005829;GO:0005856;GO:0005871;GO:0005874;GO:0006281;GO:0007018;GO:0007062;GO:0007080;GO:0008017;GO:0016607;GO:0016887;GO:0051310;GO:0072686	K10403	-	Z	KOG0242;35AA7;38GPV;3BF94;3CWIA;3JAE3;487C8;48XUX;4M8YK;4MV84	kinesin family member 22 [Source:HGNC Symbol;Acc:HGNC:6391]	3835	Q14807	GO:0000278//mitotic cell cycle;GO:0006281//DNA repair;GO:0007018//microtubule-based movement;GO:0007062//sister chromatid cohesion;GO:0007080//mitotic metaphase plate congression;GO:0051310//metaphase plate congression;	GO:0000776//kinetochore;GO:0000785//chromatin;GO:0005634//nucleus;GO:0005737//cytoplasm;GO:0005819//spindle;GO:0005829//cytosol;GO:0005856//cytoskeleton;GO:0005871//kinesin complex;GO:0005874//microtubule;GO:0016607//nuclear speck;GO:0072686//mitotic spindle;	GO:0000166//nucleotide binding;GO:0003677//DNA binding;GO:0003774//cytoskeletal motor activity;GO:0003777//microtubule motor activity;GO:0005515//protein binding;GO:0005524//ATP binding;GO:0008017//microtubule binding;GO:0016887//ATP hydrolysis activity;	ko04914(Progesterone-mediated oocyte maturation)	KIF22
ENSG00000131016	15239.9	162.320172397574	113.998148583252	136.835030295343	53.7539815599985	64.9846612575406	55.5338767671392	0.417	-1.262	1.209e-12	6.064e-11	Down Regulation	6	151239967	151358559	+	8775	AKAP12	GO:0005515;GO:0005516;GO:0005737;GO:0005829;GO:0005856;GO:0005886;GO:0005925;GO:0005938;GO:0007165;GO:0007186;GO:0007193;GO:0008179;GO:0010738;GO:0010739;GO:0016020;GO:0032496;GO:0032760;GO:0035733;GO:0043025;GO:0043116;GO:0050804;GO:0051018;GO:0051602;GO:0051770;GO:0061870;GO:0070374;GO:0071347;GO:0071356;GO:0090036;GO:0098685;GO:0110165;GO:1900143	K16528	-	S;T;U	2RDV6;35NY9;39UHP;3BEY2;3CT26;3J697;488R8;492KF;4MAEN;4MWP1	A-kinase anchoring protein 12 [Source:HGNC Symbol;Acc:HGNC:370]	9590	Q02952;Q86TJ9	GO:0007165//signal transduction;GO:0007186//G protein-coupled receptor signaling pathway;GO:0007193//adenylate cyclase-inhibiting G protein-coupled receptor signaling pathway;GO:0010738//regulation of protein kinase A signaling;GO:0010739//positive regulation of protein kinase A signaling;GO:0032496//response to lipopolysaccharide;GO:0032760//positive regulation of tumor necrosis factor productio…	GO:0005737//cytoplasm;GO:0005829//cytosol;GO:0005856//cytoskeleton;GO:0005886//plasma membrane;GO:0005925//focal adhesion;GO:0005938//cell cortex;GO:0016020//membrane;GO:0043025//neuronal cell body;GO:0098685//Schaffer collateral - CA1 synapse;GO:0110165//cellular anatomical entity;	GO:0005515//protein binding;GO:0005516//calmodulin binding;GO:0008179//adenylate cyclase binding;GO:0051018//protein kinase A binding;	-	AKAP12
ENSG00000105048	796.244	26.4732728938609	27.7874858027876	26.0214049317139	15.2000812923951	15.3952093712147	16.7105379391476	0.5828	-0.7789	1.232e-12	6.158e-11	Nodiff	19	55132698	55149206	-	2119	TNNT1	GO:0003009;GO:0005515;GO:0005523;GO:0005829;GO:0005861;GO:0006936;GO:0006937;GO:0014883;GO:0031014;GO:0031444;GO:0044057;GO:0045214;GO:0045932	K10372	-	S;Z	KOG3634;35H3S;38ZQX;3BH6Z;3CWIE;3JN7Q;483NM;48V9F;4M8A4;4MUQ7	troponin T1, slow skeletal type [Source:HGNC Symbol;Acc:HGNC:11948]	7138	P13805	GO:0003009//skeletal muscle contraction;GO:0006936//muscle contraction;GO:0006937//regulation of muscle contraction;GO:0014883//transition between fast and slow fiber;GO:0031444//slow-twitch skeletal muscle fiber contraction;GO:0044057//regulation of system process;GO:0045214//sarcomere organization;GO:0045932//negative regulation of muscle contraction;	GO:0005829//cytosol;GO:0005861//troponin complex;	GO:0005515//protein binding;GO:0005523//tropomyosin binding;GO:0031014//troponin T binding;	-	TNNT1
ENSG00000205707	516.055	7.59192908869538	8.24955785718235	7.80302285328387	17.9603347380058	14.0012567178958	15.4972037276209	1.9854	0.9895	1.292e-12	6.437e-11	Nodiff	12	25195216	25209645	+	2474	ETFRF1	GO:0005515;GO:0005739;GO:0022904	-	-	S	2S4S4;35QKJ;3A8BY;3BSM9;3D9AI;3JHDC;48G09;49CX4;4MJWF;4N7C6	electron transfer flavoprotein regulatory factor 1 [Source:HGNC Symbol;Acc:HGNC:27052]	144363	Q6IPR1	GO:0022904//respiratory electron transport chain;	GO:0005739//mitochondrion;	GO:0005515//protein binding;	-	ETFRF1
ENSG00000165490	815.398	14.2125917895386	11.1716933660219	11.8204117747697	4.28671874500543	4.07718117364187	6.18629659827234	0.3848	-1.378	1.3e-12	6.452e-11	Down Regulation	11	82899975	82958277	+	5339	DDIAS	GO:0003674;GO:0005575;GO:0005634;GO:0005737;GO:0006915;GO:0007049;GO:0051726;GO:0097752;GO:1902230	-	-	S	2R2XT;35P2V;39V54;3BFXK;3CVUA;3J5H9;4865K;48VD2;4MBRS;4MS5J	DNA damage induced apoptosis suppressor [Source:HGNC Symbol;Acc:HGNC:26351]	220042	Q8IXT1	GO:0006915//apoptotic process;GO:0007049//cell cycle;GO:0051726//regulation of cell cycle;GO:0097752//regulation of DNA stability;GO:1902230//negative regulation of intrinsic apoptotic signaling pathway in response to DNA damage;	GO:0005575//cellular_component;GO:0005634//nucleus;GO:0005737//cytoplasm;	GO:0003674//molecular_function;	-	DDIAS
[truncated: 16,762 more rows]
